# Supplementary material for: TSA-seq reveals a largely conserved genome organization relative to nuclear speckles with small position changes tightly correlated with gene expression changes
Source: HighWire-hosted journal article supplement (doi:10.1101/gr.266239.120), 2020-12-18
Supplement: Supplemental_Table_S6.xlsx [file Supplemental_Table_S6.xlsx]

## Sheet: README
Supplemental Table S6: Results of RNA-seq data analysis and correlation with TSA-seq data in H1, HCT116, K562 and HFF

## Sheet: RNA-seq
Cell	Source	data_id
K562	ENCODE	ENCSR000EYO
H1	ENCODE	ENCSR000EYP
HCT116	ENCODE	ENCSR000CWM
HFF	GEO	GSE100576

## Sheet: H1
gene_id	transcript_id(s)	length	effective_length	expected_count	TPM	FPKM	posterior_mean_count	posterior_standard_deviation_of_count	pme_TPM	pme_FPKM	TPM_ci_lower_bound	TPM_ci_upper_bound	TPM_coefficient_of_quartile_variation	FPKM_ci_lower_bound	FPKM_ci_upper_bound	FPKM_coefficient_of_quartile_variation	#chrom	start	stop	mid	strand	gene_type	gene_status	gene_name	isoform_count	exon_count	H1_SON_TSA_2.0	H1_SON_TSA_2.0.deciles	H1_SON_TSA_2.0.vigintiles	FPKM_percentile
ENSG00000000003.14	ENST00000373020.8,ENST00000494424.1,ENST00000496771.5,ENST00000612152.4,ENST00000614008.4	2141.66	1921.54	2141	41.51	34.94	2141	0	39.5	34.92	37.69	41.3715	0.0160994	33.3324	36.5904	0.0160966	chrX	100627109	100639991	100633550	-	protein_coding	KNOWN	TSPAN6	5	8	-0.037474	Decile 7	Vigintile 14	Expr 80-90%
ENSG00000000005.5	ENST00000373031.4,ENST00000485971.1	976.4	756.32	28	1.38	1.16	28	0	1.45	1.28	0.850681	2.06749	0.147502	0.762016	1.83807	0.147486	chrX	100584802	100599885	100592343	+	protein_coding	KNOWN	TNMD	2	7	-0.596778	Decile 2	Vigintile 4	Expr 20-30%
ENSG00000000419.12	ENST00000371582.8,ENST00000371584.8,ENST00000371588.9,ENST00000413082.1,ENST00000466152.5,ENST00000494752.1	991.89	771.78	786	37.94	31.93	786	0	36.06	31.88	32.9856	39.3157	0.0300742	29.1475	34.7486	0.0300265	chr20	50934867	50958555	50946711	-	protein_coding	KNOWN	DPM1	6	10	0.372938	Decile 9	Vigintile 17	Expr 80-90%
ENSG00000000457.13	ENST00000367770.5,ENST00000367771.10,ENST00000367772.8,ENST00000423670.1,ENST00000470238.1	3383.1	3162.98	222.9	2.63	2.21	223.25	3.41	2.59	2.29	2.12203	3.05199	0.0613205	1.88378	2.70667	0.0613062	chr1	169849631	169894267	169871949	-	protein_coding	KNOWN	SCYL3	5	14	-0.384155	Decile 4	Vigintile 8	Expr 30-40%
ENSG00000000460.16	ENST00000286031.10,ENST00000359326.8,ENST00000413811.3,ENST00000459772.5,ENST00000466580.6,ENST00000472795.5,ENST00000481744.5,ENST00000496973.5,ENST00000498289.5	2297.61	2077.5	1025.1	18.38	15.47	1024.75	3.41	17.8	15.74	16.1893	19.3784	0.0305067	14.3481	17.168	0.0304409	chr1	169662007	169854080	169758043	+	protein_coding	KNOWN	C1orf112	9	29	-0.339095	Decile 5	Vigintile 9	Expr 60-70%
ENSG00000000938.12	ENST00000374003.7,ENST00000374004.5,ENST00000374005.7,ENST00000399173.5,ENST00000457296.5,ENST00000468038.1,ENST00000475472.5	2241.42	2021.3	17	0.31	0.26	17	0	0.56	0.5	0.306998	0.861104	0.168935	0.269771	0.760001	0.169038	chr1	27612064	27635277	27623670	-	protein_coding	KNOWN	FGR	7	13	1.03466	Decile 10	Vigintile 20	Expr 10-20%
ENSG00000000971.15	ENST00000359637.2,ENST00000367429.8,ENST00000466229.5,ENST00000470918.1,ENST00000496761.1,ENST00000630130.2	2587.83	2367.73	0	0	0	0	0	0.24	0.21	0.0443359	0.50486	0.35248	0.0391859	0.446715	0.352369	chr1	196651878	196747504	196699691	+	protein_coding	KNOWN	CFH	6	22	-0.544419	Decile 3	Vigintile 5	Non-expressed
ENSG00000001036.13	ENST00000002165.10,ENST00000367585.1,ENST00000451668.1	2304.72	2084.61	2132.24	38.11	32.07	2132.08	0.94	36.33	32.12	34.6119	37.9946	0.0158806	30.6427	33.629	0.015871	chr6	143494811	143511690	143503250	-	protein_coding	KNOWN	FUCA2	3	7	-0.49738	Decile 3	Vigintile 6	Expr 80-90%
ENSG00000001084.10	ENST00000229416.10,ENST00000504353.1,ENST00000504525.1,ENST00000505197.1,ENST00000505294.5,ENST00000509541.5,ENST00000510837.5,ENST00000513939.5,ENST00000514004.5,ENST00000514373.2,ENST00000514933.1,ENST00000515580.1,ENST00000616923.4	2535.31	2315.21	1540	24.78	20.86	1540	0.04	25.02	22.12	21.2226	29.2189	0.0577956	18.801	25.8766	0.0578961	chr6	53497341	53616970	53557155	-	protein_coding	KNOWN	GCLC	13	16	-0.142545	Decile 6	Vigintile 12	Expr 70-80%
ENSG00000001167.14	ENST00000341376.10,ENST00000353205.5	2669.32	2449.21	1474	22.42	18.87	1474	0	21.25	18.79	19.9438	22.5993	0.021537	17.6509	19.9977	0.0215005	chr6	41072945	41099976	41086460	+	protein_coding	KNOWN	NFYA	2	10	0.217637	Decile 8	Vigintile 16	Expr 70-80%
ENSG00000001460.17	ENST00000003583.12,ENST00000337248.8,ENST00000374409.5,ENST00000435187.1,ENST00000438866.1,ENST00000468303.5,ENST00000475760.1,ENST00000483261.1,ENST00000483528.1,ENST00000492753.1,ENST00000497384.1,ENST00000498488.5	2189.85	1969.74	335	6.34	5.33	335	0	7.01	6.2	5.82293	8.27016	0.0590631	5.15216	7.31694	0.0589724	chr1	24356999	24416934	24386966	-	protein_coding	KNOWN	STPG1	12	10	0.773368	Decile 10	Vigintile 19	Expr 40-50%
ENSG00000001461.16	ENST00000003912.7,ENST00000339255.2,ENST00000358028.8,ENST00000374399.8,ENST00000432012.1,ENST00000475663.2,ENST00000488155.1	3468.83	3248.72	563	6.46	5.43	563	0	6.44	5.7	5.68263	7.21643	0.0409121	5.03058	6.38643	0.0408152	chr1	24415794	24472976	24444385	+	protein_coding	KNOWN	NIPAL3	7	13	0.707715	Decile 10	Vigintile 19	Expr 40-50%
ENSG00000001497.16	ENST00000374804.9,ENST00000374807.9,ENST00000374811.7,ENST00000469091.1,ENST00000484069.1	2416.35	2196.24	3041	51.58	43.42	3041	0	49.02	43.34	47.1275	51.0057	0.013531	41.7063	45.1381	0.0135637	chrX	65512582	65534775	65523678	-	protein_coding	KNOWN	LAS1L	5	14	0.18312	Decile 8	Vigintile 16	Expr 80-90%
ENSG00000001561.6	ENST00000321037.4	4651	4430.89	153	1.29	1.08	153	0	1.23	1.08	1.03172	1.41732	0.0546225	0.913484	1.25479	0.0545956	chr6	46129993	46146699	46138346	+	protein_coding	KNOWN	ENPP4	1	4	0.053547	Decile 8	Vigintile 15	Expr 20-30%
ENSG00000001617.11	ENST00000002829.7,ENST00000413852.5,ENST00000414301.5,ENST00000420831.1,ENST00000426511.5,ENST00000434342.5,ENST00000450338.5,ENST00000470737.1,ENST00000493743.1	3034.46	2814.36	1600	21.18	17.83	1600	0	21.2	18.75	18.8761	23.7003	0.0401482	16.7176	20.9827	0.040134	chr3	50155045	50189075	50172060	+	protein_coding	KNOWN	SEMA3F	9	19	1.68325	Decile 10	Vigintile 20	Expr 60-70%
ENSG00000001626.14	ENST00000003084.10,ENST00000426809.5,ENST00000429014.1,ENST00000446805.1,ENST00000468795.1,ENST00000472848.1,ENST00000546407.1,ENST00000600166.1,ENST00000608965.5,ENST00000610149.1,ENST00000621535.1	2073.54	1853.45	98	1.97	1.66	98	0	35.37	31.27	2.8332	94.3614	0.527869	2.53156	83.4945	0.527694	chr7	117465784	117715971	117590877	+	protein_coding	KNOWN	CFTR	11	27	-0.536126	Decile 3	Vigintile 5	Expr 20-30%
ENSG00000001629.9	ENST00000265742.7,ENST00000413588.1,ENST00000422095.1,ENST00000439883.1,ENST00000442183.1,ENST00000465883.1,ENST00000486698.1	4680.14	4460.03	1819	15.19	12.79	1819	0	15.29	13.52	13.896	16.7698	0.0319696	12.2798	14.8213	0.0319495	chr7	92246234	92401384	92323809	+	protein_coding	KNOWN	ANKIB1	7	20	-0.202803	Decile 6	Vigintile 11	Expr 60-70%
ENSG00000001630.15	ENST00000003100.12,ENST00000422867.1,ENST00000435873.1,ENST00000450723.5,ENST00000482924.1	2548.82	2328.7	2221.79	35.54	29.92	2218.91	3.2	34.02	30.08	32.2824	35.7844	0.0177053	28.5279	31.6245	0.0176021	chr7	92112151	92142952	92127551	-	protein_coding	KNOWN	CYP51A1	5	10	-0.051347	Decile 7	Vigintile 13	Expr 70-80%
ENSG00000001631.14	ENST00000340022.6,ENST00000394503.6,ENST00000394505.6,ENST00000394507.5,ENST00000412043.6,ENST00000413688.5,ENST00000422347.5,ENST00000425073.1,ENST00000425919.5,ENST00000430102.5,ENST00000433016.5,ENST00000440209.5,ENST00000444960.5,ENST00000445516.1,ENST00000452773.5,ENST00000454017.5,ENST00000458177.5,ENST00000458493.5,ENST00000466166.1,ENST00000470309.5,ENST00000475770.5,ENST00000486261.5,ENS…	1821.55	1601.45	727.49	16.92	14.24	727.39	0.77	18.96	16.77	16.3119	21.7773	0.0498186	14.4017	19.2291	0.0497557	chr7	92198969	92246166	92222567	-	protein_coding	KNOWN	KRIT1	25	20	-0.343088	Decile 5	Vigintile 9	Expr 60-70%
ENSG00000002016.16	ENST00000228345.9,ENST00000358495.7,ENST00000397230.6,ENST00000430095.6,ENST00000461568.5,ENST00000463750.5,ENST00000468231.5,ENST00000481052.5,ENST00000488642.6,ENST00000535376.5,ENST00000536177.5,ENST00000539046.5,ENST00000541619.1,ENST00000542297.1,ENST00000542584.5,ENST00000542785.5,ENST00000543912.5,ENST00000544742.5,ENST00000545564.5,ENST00000545967.1	1351.74	1131.68	395.97	13.03	10.97	395.84	0.78	14.13	12.5	11.6135	16.8141	0.0631479	10.2535	14.8528	0.0631726	chr12	912077	990053	951065	-	protein_coding	KNOWN	RAD52	20	14	0.56262	Decile 9	Vigintile 18	Expr 50-60%
ENSG00000002330.13	ENST00000309032.7,ENST00000394531.3,ENST00000394532.7,ENST00000492141.1,ENST00000493798.1,ENST00000544271.1,ENST00000544785.1	937.73	717.64	383.09	19.89	16.74	382.92	1.54	19.94	17.63	17.5293	22.6675	0.0434193	15.4625	20.0086	0.0433997	chr11	64269830	64284704	64277267	-	protein_coding	KNOWN	BAD	7	5	1.85819	Decile 10	Vigintile 20	Expr 60-70%
ENSG00000002549.12	ENST00000226299.8,ENST00000503467.1,ENST00000504614.5,ENST00000507960.1,ENST00000508014.5,ENST00000508497.5,ENST00000509583.1,ENST00000512397.1,ENST00000513105.1,ENST00000606142.5,ENST00000618908.4	1892.29	1672.17	1889	42.08	35.42	1889	0	41.08	36.32	39.043	43.3009	0.0176878	34.5328	38.2879	0.0177074	chr4	17577192	17607972	17592582	+	protein_coding	KNOWN	LAP3	11	13	0.003865	Decile 7	Vigintile 14	Expr 80-90%
ENSG00000002586.18	ENST00000381177.6,ENST00000381180.8,ENST00000381184.6,ENST00000381187.8,ENST00000381192.8,ENST00000449611.6,ENST00000482293.6,ENST00000482405.7,ENST00000497752.6,ENST00000611428.5,ENST00000623253.4,ENST00000624481.4	1190.21	970.1	1596	61.29	51.58	1596	0	59.39	52.52	56.2783	62.5981	0.0183234	49.7764	55.36	0.0182983	chrX	2691179	2741309	2716244	+	protein_coding	KNOWN	CD99	12	11	0.625412	Decile 9	Vigintile 18	Expr 80-90%
ENSG00000002587.9	ENST00000002596.5,ENST00000510712.1,ENST00000514690.5	3850.48	3630.42	60	0.62	0.52	60	0	0.89	0.79	0.366765	1.4967	0.229975	0.328096	1.32732	0.230053	chr4	11393150	11429765	11411457	-	protein_coding	KNOWN	HS3ST1	3	2	-0.339667	Decile 5	Vigintile 9	Expr 10-20%
ENSG00000002726.19	ENST00000360937.8,ENST00000416793.6,ENST00000460213.1,ENST00000467291.5,ENST00000480582.1,ENST00000483043.1,ENST00000493429.5,ENST00000619575.1,ENST00000622116.4	2009.96	1789.85	8	0.17	0.14	8	0	0.38	0.34	0.175692	0.612243	0.201002	0.155552	0.541823	0.201023	chr7	150824627	150861504	150843065	+	protein_coding	KNOWN	AOC1	9	12	0.770463	Decile 10	Vigintile 19	Expr 0-10%
ENSG00000002745.12	ENST00000222462.2,ENST00000361301.6	2554.64	2334.53	23	0.37	0.31	23	0	0.41	0.36	0.217862	0.62865	0.175464	0.194142	0.55756	0.175464	chr7	121325367	121341104	121333235	+	protein_coding	KNOWN	WNT16	2	4	-0.479177	Decile 4	Vigintile 7	Expr 10-20%
ENSG00000002746.14	ENST00000395891.6,ENST00000429529.1,ENST00000453890.5,ENST00000461842.1,ENST00000464944.1,ENST00000471043.1,ENST00000471527.1,ENST00000481031.5,ENST00000490954.2,ENST00000492310.5,ENST00000493057.1	4694.3	4474.19	307	2.56	2.15	307	0	3.43	3.03	2.57378	4.38202	0.0911716	2.25074	3.85168	0.0912046	chr7	43112599	43566001	43339300	+	protein_coding	KNOWN	HECW1	11	30	0.091757	Decile 8	Vigintile 15	Expr 30-40%
ENSG00000002822.15	ENST00000265854.11,ENST00000399654.6,ENST00000402746.5,ENST00000406869.5,ENST00000421113.5,ENST00000429625.5,ENST00000429779.1,ENST00000437877.1,ENST00000438959.5,ENST00000444373.6,ENST00000445959.5,ENST00000450235.5,ENST00000455998.5,ENST00000459731.1,ENST00000464742.5,ENST00000468372.5,ENST00000469871.1,ENST00000477172.1,ENST00000481633.1,ENST00000483165.5,ENST00000486340.5,ENST00000491858.5,EN…	1516.41	1296.34	971.78	27.93	23.5	971.16	0.77	28.95	25.6	25.1146	32.7466	0.0452449	22.2751	29.0297	0.0452358	chr7	1815793	2233243	2024518	-	protein_coding	KNOWN	MAD1L1	23	19	1.21196	Decile 10	Vigintile 20	Expr 70-80%
ENSG00000002834.17	ENST00000318008.10,ENST00000419929.1,ENST00000433206.6,ENST00000435347.7,ENST00000443937.7,ENST00000579123.1,ENST00000581485.1,ENST00000584106.1,ENST00000585841.5	4081.85	3861.74	10138.1	97.8	82.31	10137.5	6.19	93.11	82.33	91.1992	95.0199	0.00702055	80.6823	84.0294	0.00694846	chr17	38869859	38921770	38895814	+	protein_coding	KNOWN	LASP1	9	8	1.39972	Decile 10	Vigintile 20	Expr 93-94%
ENSG00000002919.14	ENST00000359238.6,ENST00000393405.6,ENST00000452859.6,ENST00000577310.1,ENST00000578861.5,ENST00000580219.5,ENST00000580875.1,ENST00000581298.5,ENST00000581705.5,ENST00000582104.5,ENST00000582481.1,ENST00000583320.5,ENST00000584335.5	2092.85	1872.73	834	16.59	13.96	834	0	17.54	15.51	15.6785	19.4992	0.0369847	13.8798	17.2576	0.0369205	chr17	48103357	48123074	48113215	+	protein_coding	KNOWN	SNX11	13	8	0.82665	Decile 10	Vigintile 19	Expr 60-70%
ENSG00000002933.7	ENST00000004103.7,ENST00000461345.5,ENST00000462826.1,ENST00000468689.1,ENST00000474166.1,ENST00000475007.5,ENST00000475536.5,ENST00000475710.1,ENST00000481305.1,ENST00000484928.5,ENST00000494349.5	1118.44	898.32	11	0.46	0.38	11	0	1.18	1.04	0.623898	1.77288	0.170849	0.552504	1.56876	0.170876	chr7	150800403	150805120	150802761	+	protein_coding	KNOWN	TMEM176A	11	7	0.684452	Decile 10	Vigintile 19	Expr 10-20%
ENSG00000003056.7	ENST00000000412.7,ENST00000536844.5,ENST00000537621.1,ENST00000539143.5,ENST00000540837.1,ENST00000541507.5,ENST00000543159.1,ENST00000543258.1,ENST00000543704.5,ENST00000543834.1,ENST00000543845.1,ENST00000544193.1,ENST00000544245.1	2241.13	2021.02	6268.29	115.54	97.25	6261.73	68.63	111.95	98.99	106.716	117.69	0.0164783	94.2982	103.989	0.0164577	chr12	8940363	8949955	8945159	-	protein_coding	KNOWN	M6PR	13	7	1.07713	Decile 10	Vigintile 20	Expr 94-95%
ENSG00000003096.13	ENST00000262820.7,ENST00000371876.5,ENST00000371878.5,ENST00000371882.5,ENST00000447671.6,ENST00000453826.1,ENST00000469946.5,ENST00000539496.5,ENST00000540167.5,ENST00000541812.5,ENST00000545703.5	3247.72	3027.6	541	6.66	5.6	540.77	0.51	6.87	6.07	5.99492	7.88043	0.0436914	5.30357	6.97239	0.0435932	chrX	117897813	118117340	118007576	-	protein_coding	KNOWN	KLHL13	11	8	-0.586631	Decile 2	Vigintile 4	Expr 40-50%
ENSG00000003137.8	ENST00000001146.6,ENST00000412253.1,ENST00000461519.1,ENST00000474509.1,ENST00000546307.5	2634.17	2414.1	13	0.2	0.17	13	0	0.48	0.42	0.14163	0.879758	0.287162	0.125718	0.77881	0.287207	chr2	72129238	72148038	72138638	-	protein_coding	KNOWN	CYP26B1	5	6	0.441174	Decile 9	Vigintile 17	Expr 10-20%
ENSG00000003147.17	ENST00000265577.11,ENST00000317367.9,ENST00000339809.10,ENST00000396675.7,ENST00000401396.5,ENST00000402384.7,ENST00000406470.6,ENST00000407906.5,ENST00000422063.6,ENST00000430867.5,ENST00000446305.1,ENST00000447326.5,ENST00000455539.5,ENST00000457755.5,ENST00000470696.1,ENST00000476942.1,ENST00000486677.1,ENST00000490041.1	1541.34	1321.27	922	26	21.88	922	0	27.02	23.89	22.562	32.1191	0.0637084	19.9498	28.4018	0.0637233	chr7	8113184	8262687	8187935	-	protein_coding	KNOWN	ICA1	18	15	-0.171278	Decile 6	Vigintile 12	Expr 70-80%
ENSG00000003249.13	ENST00000002501.10,ENST00000304733.7,ENST00000392973.7,ENST00000568330.2,ENST00000568662.1,ENST00000568838.1,ENST00000623401.1	2099.66	1879.54	2473	49.02	41.26	2473	0	46.79	41.37	44.8986	48.7538	0.0141099	39.7136	43.1144	0.0140889	chr16	90004865	90020128	90012496	-	protein_coding	KNOWN	DBNDD1	7	5	1.62372	Decile 10	Vigintile 20	Expr 80-90%
ENSG00000003393.14	ENST00000264276.10,ENST00000409632.6,ENST00000410052.1,ENST00000439495.5,ENST00000462747.1,ENST00000467448.5,ENST00000482789.5,ENST00000482891.5,ENST00000483703.1,ENST00000489440.5,ENST00000494017.5,ENST00000496244.5	5780.54	5560.42	1951	13.07	11	1951	0	13.86	12.26	12.2729	15.5515	0.0415198	10.8545	13.7545	0.0415029	chr2	201700554	201781189	201740871	-	protein_coding	KNOWN	ALS2	12	34	-0.116125	Decile 7	Vigintile 13	Expr 50-60%
ENSG00000003400.14	ENST00000272879.9,ENST00000286186.10,ENST00000313728.11,ENST00000346817.9,ENST00000360132.7,ENST00000374650.7,ENST00000438843.5,ENST00000448480.1,ENST00000460140.5,ENST00000471191.1,ENST00000484926.1,ENST00000485408.1,ENST00000492363.5	3882.42	3662.32	211	2.15	1.81	211	0	2.87	2.54	2.15576	3.6498	0.0894319	1.91546	3.23703	0.0895268	chr2	201182881	201229406	201206143	+	protein_coding	KNOWN	CASP10	13	10	0.003238	Decile 7	Vigintile 14	Expr 20-30%
ENSG00000003402.19	ENST00000309955.7,ENST00000340870.6,ENST00000341222.10,ENST00000341582.10,ENST00000342795.9,ENST00000395148.6,ENST00000417748.1,ENST00000423241.6,ENST00000425030.1,ENST00000433445.1,ENST00000439154.6,ENST00000440180.5,ENST00000441224.5,ENST00000443227.5,ENST00000457277.5,ENST00000460961.1,ENST00000461422.1,ENST00000461820.5,ENST00000462763.5,ENST00000470178.6,ENST00000470664.1,ENST00000474842.1,E…	3004.58	2784.48	389.79	5.22	4.39	387.31	3.34	7.31	6.47	5.81371	8.84822	0.0718797	5.14268	7.82611	0.0718424	chr2	201116104	201176687	201146395	+	protein_coding	KNOWN	CFLAR	25	10	0.130494	Decile 8	Vigintile 15	Expr 40-50%
ENSG00000003436.14	ENST00000233156.7,ENST00000339091.8,ENST00000392365.5,ENST00000409676.5,ENST00000417013.5,ENST00000420747.1,ENST00000421427.5,ENST00000426055.5,ENST00000435414.5,ENST00000437725.5,ENST00000453013.5,ENST00000481132.5,ENST00000481389.1	1570.24	1350.14	86	2.37	2	86	0	3.13	2.76	2.23393	4.0744	0.102834	1.96795	3.59678	0.102815	chr2	187464230	187565760	187514995	-	protein_coding	KNOWN	TFPI	13	8	-0.728493	Decile 1	Vigintile 2	Expr 30-40%
ENSG00000003509.15	ENST00000002125.8,ENST00000336237.10,ENST00000416653.5,ENST00000419278.2,ENST00000431821.5,ENST00000432075.1,ENST00000439218.5,ENST00000441905.1,ENST00000455230.5,ENST00000469831.1,ENST00000474154.5,ENST00000474257.5,ENST00000483999.5	1490.33	1270.22	1536.79	45.07	37.93	1537.03	2.77	43.95	38.86	40.527	47.3878	0.0265352	35.8058	41.8692	0.0264614	chr2	37231631	37253403	37242517	+	protein_coding	KNOWN	NDUFAF7	13	10	0.439001	Decile 9	Vigintile 17	Expr 80-90%
ENSG00000003756.16	ENST00000347869.7,ENST00000395174.6,ENST00000404526.6,ENST00000417905.1,ENST00000433556.6,ENST00000437500.5,ENST00000438369.5,ENST00000441305.5,ENST00000441812.6,ENST00000461242.1,ENST00000462025.1,ENST00000464087.6,ENST00000464988.1,ENST00000469838.5,ENST00000471995.5,ENST00000474470.1,ENST00000474818.5,ENST00000475128.5,ENST00000475590.5,ENST00000479275.1,ENST00000489437.1,ENST00000492430.1,ENS…	2205.61	1985.52	3678.68	69.02	58.09	3678.14	5.41	68.99	61.01	63.0033	75.3448	0.031145	55.7945	66.6992	0.0311385	chr3	50088908	50119021	50103964	+	protein_coding	KNOWN	RBM5	26	25	1.01079	Decile 10	Vigintile 19	Expr 80-90%
ENSG00000003987.13	ENST00000180173.9,ENST00000517317.5,ENST00000518272.5,ENST00000519122.5,ENST00000519590.5,ENST00000519763.1,ENST00000521177.1,ENST00000521857.5,ENST00000523571.1	2949.38	2729.28	195.14	2.66	2.24	193.84	2.63	3.69	3.26	2.68605	4.80587	0.0999901	2.36991	4.24622	0.0999798	chr8	17298030	17413528	17355779	-	protein_coding	KNOWN	MTMR7	9	14	-0.258655	Decile 6	Vigintile 11	Expr 30-40%
ENSG00000003989.16	ENST00000004531.14,ENST00000398090.3,ENST00000470360.5,ENST00000494857.5,ENST00000522656.5	6590.09	6369.98	1538	8.99	7.57	1538	0	8.57	7.58	7.89166	9.24456	0.0275751	6.9686	8.16348	0.0275666	chr8	17497088	17570573	17533830	+	protein_coding	KNOWN	SLC7A2	5	14	-0.335274	Decile 5	Vigintile 9	Expr 50-60%
ENSG00000004059.10	ENST00000000233.9,ENST00000415666.1,ENST00000459680.1,ENST00000463733.5,ENST00000467281.5,ENST00000489673.1	1115.85	895.74	3320.78	138.11	116.24	3320.57	0.71	132.03	116.74	127.445	136.791	0.0121582	112.757	121.014	0.0121333	chr7	127588345	127591705	127590025	+	protein_coding	KNOWN	ARF5	6	6	0.18336	Decile 8	Vigintile 16	Expr 95-96%
ENSG00000004139.13	ENST00000379061.8,ENST00000577870.2,ENST00000578128.5,ENST00000579593.1,ENST00000580711.1,ENST00000582323.1,ENST00000585453.5,ENST00000585482.5	3035.99	2815.88	377.48	4.99	4.2	378.8	19.77	5.37	4.75	4.23725	6.5214	0.0732243	3.74889	5.77003	0.0732472	chr17	28364356	28404049	28384202	+	protein_coding	KNOWN	SARM1	8	11	1.22225	Decile 10	Vigintile 20	Expr 40-50%
ENSG00000004142.11	ENST00000540200.5,ENST00000618887.2	2121	1900.89	2919	57.21	48.15	2919	0	54.22	47.94	52.2157	56.1908	0.0125429	46.1489	49.6542	0.0125559	chr17	28347177	28357522	28352349	-	protein_coding	KNOWN	POLDIP2	2	11	1.13722	Decile 10	Vigintile 20	Expr 80-90%
ENSG00000004399.12	ENST00000324093.8,ENST00000501038.6,ENST00000503166.1,ENST00000504524.5,ENST00000504689.1,ENST00000504767.5,ENST00000504979.1,ENST00000505237.2,ENST00000505505.1,ENST00000505665.5,ENST00000506979.1,ENST00000508630.1,ENST00000511018.1,ENST00000512744.5,ENST00000512807.1,ENST00000514990.1,ENST00000515191.1	2535.69	2315.6	2537	40.82	34.35	2537	0	41.21	36.43	36.7746	45.7201	0.0367231	32.4482	40.3538	0.0366512	chr3	129555175	129606818	129580996	-	protein_coding	KNOWN	PLXND1	17	36	1.11047	Decile 10	Vigintile 20	Expr 80-90%
ENSG00000004455.16	ENST00000354858.10,ENST00000373449.6,ENST00000466029.1,ENST00000467905.5,ENST00000469238.1,ENST00000480134.5,ENST00000482191.1,ENST00000487289.1,ENST00000491241.1,ENST00000548033.5,ENST00000548559.1,ENST00000550338.5,ENST00000551979.1,ENST00000626911.1,ENST00000629371.2	861.69	667.25	2922.31	163.16	137.32	2922.1	1.42	188.52	166.69	98.466	297.151	0.199758	86.6242	262.397	0.199763	chr1	33007940	33080996	33044468	-	protein_coding	KNOWN	AK2	15	8	0.601573	Decile 9	Vigintile 18	Expr 95-96%
ENSG00000004468.12	ENST00000226279.7,ENST00000502843.5,ENST00000506191.1,ENST00000510674.1,ENST00000511430.1	1868.15	1648.14	7	0.16	0.13	7	0	0.45	0.4	0.106088	0.912776	0.332544	0.0953076	0.808655	0.332544	chr4	15778275	15853230	15815752	+	protein_coding	KNOWN	CD38	5	8	-0.329258	Decile 5	Vigintile 9	Expr 0-10%
ENSG00000004478.7	ENST00000001008.5,ENST00000538622.1,ENST00000539181.1,ENST00000540260.1,ENST00000543037.1,ENST00000543769.1,ENST00000544366.1,ENST00000630279.1	3591.32	3371.21	11377.9	125.73	105.82	11377.9	0.36	144.81	128.04	117.609	194.649	0.0951197	104.505	172.615	0.095181	chr12	2794953	2805423	2800188	+	protein_coding	KNOWN	FKBP4	8	10	0.771276	Decile 10	Vigintile 19	Expr 94-95%
ENSG00000004487.15	ENST00000356634.7,ENST00000400181.8,ENST00000465864.1,ENST00000481879.1,ENST00000494920.1,ENST00000602503.1	2507.09	2286.97	11112	181.01	152.35	11112	0.1	172.14	152.2	166.284	177.997	0.0116785	147.022	157.357	0.0116754	chr1	23019448	23083689	23051568	+	protein_coding	KNOWN	KDM1A	6	21	0.41476	Decile 9	Vigintile 17	Expr 96-97%
ENSG00000004534.14	ENST00000266022.8,ENST00000419610.5,ENST00000421682.1,ENST00000422955.5,ENST00000425608.5,ENST00000433811.1,ENST00000434592.5,ENST00000438912.1,ENST00000441115.5,ENST00000442092.5,ENST00000443081.5,ENST00000446471.1,ENST00000454079.5,ENST00000464013.5,ENST00000466247.1,ENST00000478026.1,ENST00000483350.1,ENST00000488807.2,ENST00000491874.5,ENST00000493652.1	2404.4	2184.29	3739.9	63.79	53.69	3740.13	1.63	62.3	55.08	58.7284	65.8898	0.0198067	51.9153	58.243	0.0198238	chr3	49940007	50100045	50020026	+	protein_coding	KNOWN	RBM6	20	21	1.05715	Decile 10	Vigintile 20	Expr 80-90%
ENSG00000004660.14	ENST00000158166.5,ENST00000348335.6,ENST00000381769.6,ENST00000573483.1	3472.83	3252.71	516	5.91	4.97	516	0	5.65	5	5.14996	6.1321	0.0301257	4.56421	5.43277	0.0301167	chr17	3860315	3894891	3877603	-	protein_coding	KNOWN	CAMKK1	4	16	1.35435	Decile 10	Vigintile 20	Expr 40-50%
ENSG00000004700.15	ENST00000314748.10,ENST00000396093.7,ENST00000421138.6,ENST00000444129.6,ENST00000536240.5,ENST00000536964.5,ENST00000539672.1,ENST00000542432.5	2595.17	2375.06	1321.99	20.74	17.45	1322.24	5.09	20.3	17.95	18.622	21.9798	0.0282835	16.4855	19.4529	0.0282473	chr12	21468911	21501669	21485290	-	protein_coding	KNOWN	RECQL	8	16	-0.611842	Decile 2	Vigintile 4	Expr 60-70%
ENSG00000004766.15	ENST00000251739.9,ENST00000305866.9,ENST00000436177.5,ENST00000438395.5,ENST00000441602.5,ENST00000443443.1,ENST00000458530.1,ENST00000458707.1,ENST00000467326.5,ENST00000471188.5,ENST00000474412.1,ENST00000476413.1,ENST00000477572.1,ENST00000477935.1,ENST00000480943.5,ENST00000484954.1,ENST00000485140.1,ENST00000485994.5,ENST00000495039.1,ENST00000544910.5	3158.1	2937.99	297	3.77	3.17	297	0	5.77	5.1	4.51083	7.09966	0.0784765	3.99346	6.28177	0.0785316	chr7	93232340	93361121	93296730	+	protein_coding	KNOWN	VPS50	20	29	-0.598435	Decile 2	Vigintile 4	Expr 30-40%
ENSG00000004776.11	ENST00000004982.4,ENST00000587965.1,ENST00000592984.5	1458	1237.89	54.47	1.64	1.38	54.6	4.29	1.67	1.48	1.18554	2.18245	0.103484	1.05552	1.93744	0.103533	chr19	35754568	35758079	35756323	-	protein_coding	KNOWN	HSPB6	3	4	1.67005	Decile 10	Vigintile 20	Expr 20-30%
ENSG00000004777.18	ENST00000007510.8,ENST00000221905.1,ENST00000314737.9,ENST00000378944.9,ENST00000586918.1,ENST00000587447.3,ENST00000587984.1,ENST00000588248.6,ENST00000589133.5,ENST00000590893.5,ENST00000591438.1,ENST00000593034.5,ENST00000601474.5	1743.44	1529.26	847	20.63	17.37	847	0	26.53	23.46	14.8306	42.6134	0.193933	13.0898	37.6626	0.193961	chr19	35774532	35788822	35781677	+	protein_coding	KNOWN	ARHGAP33	13	21	1.56991	Decile 10	Vigintile 20	Expr 60-70%
ENSG00000004779.9	ENST00000007516.7,ENST00000484769.1,ENST00000562133.5,ENST00000567761.1,ENST00000570319.5	716.78	496.69	1786	133.96	112.75	1786	0	127.25	112.51	121.359	133.066	0.015985	107.369	117.701	0.0160141	chr16	23581002	23596356	23588679	-	protein_coding	KNOWN	NDUFAB1	5	6	0.936933	Decile 10	Vigintile 19	Expr 95-96%
ENSG00000004799.7	ENST00000005178.5,ENST00000468445.1,ENST00000473301.1,ENST00000473796.1,ENST00000498190.1	2674.15	2454.04	6	0.09	0.08	6	0	0.46	0.41	0.122797	0.90873	0.307905	0.108666	0.804243	0.308008	chr7	95583499	95596491	95589995	-	protein_coding	KNOWN	PDK4	5	11	-0.396958	Decile 4	Vigintile 8	Expr 0-10%
ENSG00000004809.13	ENST00000330550.8,ENST00000368919.7,ENST00000424139.1,ENST00000434949.5,ENST00000437378.5,ENST00000451557.5,ENST00000460159.1,ENST00000461487.1	1391.75	1171.65	0	0	0	0	0	0.37	0.33	0.103849	0.716186	0.297627	0.0915829	0.633144	0.297458	chr6	110424687	110476641	110450664	-	protein_coding	KNOWN	SLC22A16	8	10	-0.185299	Decile 6	Vigintile 12	Non-expressed
ENSG00000004838.13	ENST00000231749.7,ENST00000360165.7,ENST00000431869.1,ENST00000442887.1,ENST00000443080.5,ENST00000468182.1,ENST00000475688.1,ENST00000478269.5,ENST00000490675.5	880.47	660.4	5	0.28	0.24	5	0	0.84	0.75	0.340143	1.42057	0.227474	0.303271	1.25948	0.227444	chr3	50341110	50346852	50343981	-	protein_coding	KNOWN	ZMYND10	9	12	1.70458	Decile 10	Vigintile 20	Expr 10-20%
ENSG00000004846.16	ENST00000258738.10,ENST00000404938.6,ENST00000406935.5,ENST00000441315.1,ENST00000443026.6,ENST00000477094.5	2770.5	2550.39	3	0.04	0.04	3	0	0.2	0.18	0.0575431	0.386276	0.284842	0.0500224	0.340969	0.284992	chr7	20615207	20777038	20696122	+	protein_coding	KNOWN	ABCB5	6	28	-0.441904	Decile 4	Vigintile 7	Expr 0-10%
ENSG00000004848.6	ENST00000379044.4	2876	2655.89	1	0.01	0.01	1	0	0.03	0.02	0.000527903	0.0631374	0.475443	0.000467103	0.0558409	0.475538	chrX	25003694	25015948	25009821	-	protein_coding	KNOWN	ARX	1	5	0.200961	Decile 8	Vigintile 16	Expr 0-10%
ENSG00000004864.13	ENST00000265631.9,ENST00000416240.6,ENST00000472162.2,ENST00000484495.5,ENST00000487710.1,ENST00000490072.5,ENST00000492869.1,ENST00000494085.1	3031.6	2811.49	3184	42.19	35.51	3184	0	47.68	42.16	39.4948	61.3579	0.077403	34.8661	54.2125	0.0774022	chr7	96120220	96322147	96221183	-	protein_coding	KNOWN	SLC25A13	8	18	-0.177508	Decile 6	Vigintile 12	Expr 80-90%
ENSG00000004866.18	ENST00000265437.9,ENST00000323984.7,ENST00000393443.5,ENST00000393444.7,ENST00000393446.6,ENST00000393447.8,ENST00000393449.5,ENST00000393451.7,ENST00000417919.5,ENST00000420755.5,ENST00000421345.5,ENST00000422922.5,ENST00000432298.5,ENST00000434836.5,ENST00000438863.5,ENST00000443979.5,ENST00000446490.5,ENST00000449366.5,ENST00000462544.1,ENST00000464020.1,ENST00000465133.5,ENST00000465641.5,ENS…	2445.37	2225.25	583.67	9.77	8.22	583.66	0.56	11.55	10.21	10.1762	12.892	0.03989	9.0347	11.4356	0.0398847	chr7	116953238	117230103	117091670	+	protein_coding	KNOWN	ST7	30	16	-0.324324	Decile 5	Vigintile 9	Expr 50-60%
ENSG00000004897.11	ENST00000066544.7,ENST00000525495.6,ENST00000526866.5,ENST00000527547.5,ENST00000528147.1,ENST00000528748.5,ENST00000531206.5,ENST00000532575.1,ENST00000532893.5,ENST00000533415.5,ENST00000570740.1,ENST00000570818.5,ENST00000571643.5,ENST00000573502.1,ENST00000573550.5,ENST00000574304.5,ENST00000575483.5,ENST00000575830.2,ENST00000576484.1	1474.26	1254.17	1396	41.47	34.9	1396	0	41.16	36.4	37.2345	45.153	0.033301	32.9391	39.9423	0.0333363	chr17	47117703	47189422	47153562	-	protein_coding	KNOWN	CDC27	19	19	0.294712	Decile 9	Vigintile 17	Expr 80-90%
ENSG00000004939.13	ENST00000262418.10,ENST00000399246.3,ENST00000471005.5,ENST00000497360.5,ENST00000498270.1,ENST00000631130.1	4965	4744.89	1	0.01	0.01	1	0	0.4	0.35	0.0603046	0.85849	0.382411	0.0525004	0.758738	0.382373	chr17	44248385	44268141	44258263	-	protein_coding	KNOWN	SLC4A1	6	20	1.39818	Decile 10	Vigintile 20	Expr 0-10%
ENSG00000004948.13	ENST00000359558.6,ENST00000360249.8,ENST00000394441.5,ENST00000415529.2,ENST00000421592.5,ENST00000423724.5,ENST00000426151.5	1956.08	1735.97	49	1.05	0.89	49	0	1.18	1.04	0.853078	1.51031	0.0965293	0.753346	1.33489	0.0966599	chr7	93424487	93574730	93499608	-	protein_coding	KNOWN	CALCR	7	16	-0.389073	Decile 4	Vigintile 8	Expr 20-30%
ENSG00000004961.14	ENST00000321143.8,ENST00000380762.4,ENST00000380763.7	1234.96	1014.84	671	24.63	20.73	671	0	23.44	20.73	21.5331	25.3826	0.0282793	19.0546	22.4598	0.028217	chrX	11111301	11123078	11117189	+	protein_coding	KNOWN	HCCS	3	7	-0.178008	Decile 6	Vigintile 12	Expr 70-80%
ENSG00000004975.11	ENST00000005340.9,ENST00000571745.1,ENST00000572285.5,ENST00000573354.1,ENST00000574143.1,ENST00000574591.1,ENST00000574642.5,ENST00000575086.1,ENST00000575458.5,ENST00000575756.5,ENST00000576285.1,ENST00000576439.1,ENST00000576840.5,ENST00000576949.1,ENST00000577154.1	2309.93	2089.82	2051.88	36.58	30.79	2051.88	0.45	36.2	32.01	33.6502	38.663	0.0237542	29.8362	34.265	0.0237367	chr17	7225341	7234545	7229943	-	protein_coding	KNOWN	DVL2	15	15	1.96754	Decile 10	Vigintile 20	Expr 80-90%
ENSG00000005001.9	ENST00000161006.7,ENST00000570950.1,ENST00000571228.1,ENST00000572061.1,ENST00000574768.5,ENST00000575164.1,ENST00000576381.1,ENST00000577177.1	844.56	624.47	54	3.22	2.71	54	0	3.74	3.31	2.68809	4.88997	0.101861	2.37492	4.32172	0.101731	chr16	2852727	2858170	2855448	-	protein_coding	KNOWN	PRSS22	8	6	1.82058	Decile 10	Vigintile 20	Expr 30-40%
ENSG00000005007.12	ENST00000262803.9,ENST00000594243.1,ENST00000594504.5,ENST00000596842.5,ENST00000598209.5,ENST00000598471.1,ENST00000599848.5,ENST00000600012.5,ENST00000600310.5,ENST00000600689.1,ENST00000600868.5,ENST00000601689.1,ENST00000601981.5	4771.84	4551.73	4209	34.45	28.99	4209	0	34.82	30.79	32.2609	37.4857	0.0259479	28.569	33.1884	0.0258578	chr19	18831938	18868236	18850087	+	protein_coding	KNOWN	UPF1	13	24	1.51551	Decile 10	Vigintile 20	Expr 70-80%
ENSG00000005020.12	ENST00000345317.6,ENST00000432747.1,ENST00000468712.5,ENST00000481204.5,ENST00000487720.1,ENST00000489977.5,ENST00000490456.6,ENST00000495802.5,ENST00000497511.5	3845.16	3625.05	116	1.19	1	116	0	2.2	1.95	1.46357	3.01306	0.123566	1.29289	2.66367	0.123666	chr7	26667062	26995239	26831150	-	protein_coding	KNOWN	SKAP2	9	13	-0.260659	Decile 6	Vigintile 11	Expr 20-30%
ENSG00000005022.5	ENST00000317881.8,ENST00000460013.1,ENST00000463551.1,ENST00000475354.1	1264.6	1044.49	13512	481.93	405.62	13512	0.2	456.7	403.82	448.6	464.672	0.00604375	397.185	411.214	0.006013	chrX	119468400	119471319	119469859	+	protein_coding	KNOWN	SLC25A5	4	4	0.108835	Decile 8	Vigintile 15	Expr 98-99%
ENSG00000005059.15	ENST00000394650.6,ENST00000452915.3,ENST00000472310.5,ENST00000494604.1,ENST00000515114.3	1247.14	1027.09	385	13.96	11.75	385	0	13.52	11.95	10.7909	16.33	0.0714986	9.52014	14.4202	0.0714808	chr4	109560205	109688726	109624465	+	protein_coding	KNOWN	CCDC109B	5	8	-0.267487	Decile 5	Vigintile 10	Expr 60-70%
ENSG00000005073.5	ENST00000006015.3,ENST00000517402.1	2295	2074.89	1.35	0.02	0.02	1.27	0.44	0.06	0.05	0.0059376	0.122818	0.385218	0.00513937	0.108535	0.385242	chr7	27181510	27185223	27183366	-	protein_coding	KNOWN	HOXA11	2	3	0.586644	Decile 9	Vigintile 18	Expr 0-10%
ENSG00000005075.15	ENST00000292614.9,ENST00000393794.4	923.07	702.96	1221.06	64.71	54.46	1220.75	8.86	61.33	54.23	57.6975	64.8923	0.0201767	51.118	57.4754	0.0201697	chr7	102473118	102478907	102476012	-	protein_coding	KNOWN	POLR2J	2	4	1.28358	Decile 10	Vigintile 20	Expr 80-90%
ENSG00000005100.12	ENST00000225296.7,ENST00000433302.7,ENST00000572490.1,ENST00000574023.1,ENST00000575153.5	4320.91	4100.79	4465	40.56	34.14	4465	0	38.47	34.01	36.9187	39.9973	0.0138936	32.6849	35.4042	0.0139142	chr17	5440912	5469060	5454986	-	protein_coding	KNOWN	DHX33	5	12	1.00779	Decile 10	Vigintile 19	Expr 80-90%
ENSG00000005102.12	ENST00000318579.8,ENST00000329168.3,ENST00000393661.2,ENST00000549132.1	2707	2486.89	2	0.03	0.03	2	0	0.14	0.12	0.0352723	0.256806	0.294592	0.0313165	0.227336	0.294614	chr17	43640388	43661954	43651171	-	protein_coding	KNOWN	MEOX1	4	4	1.12764	Decile 10	Vigintile 20	Expr 0-10%
ENSG00000005108.15	ENST00000408005.2,ENST00000423059.8,ENST00000480061.1,ENST00000497575.1,ENST00000617773.1	10663	10442.9	173	0.62	0.52	173	0	1	0.89	0.625668	1.49551	0.157521	0.553268	1.32253	0.15749	chr7	11370357	11832198	11601277	-	protein_coding	KNOWN	THSD7A	5	28	-0.579242	Decile 3	Vigintile 5	Expr 10-20%
ENSG00000005156.11	ENST00000262327.9,ENST00000378526.8,ENST00000585370.1,ENST00000585740.5,ENST00000585941.5,ENST00000586058.1,ENST00000586119.1,ENST00000586407.1,ENST00000586435.1,ENST00000588109.5,ENST00000588713.1,ENST00000590181.5,ENST00000590630.5,ENST00000592244.1,ENST00000592690.1,ENST00000593099.5	3345.79	3125.69	3990.12	47.56	40.03	3984.2	17.4	48.97	43.3	42.4879	55.6902	0.0451642	37.5567	49.2345	0.0451843	chr17	34980494	35009743	34995118	+	protein_coding	KNOWN	LIG3	16	20	0.651124	Decile 9	Vigintile 18	Expr 80-90%
ENSG00000005175.9	ENST00000005386.7,ENST00000380650.4,ENST00000432584.7,ENST00000547706.1,ENST00000548211.1,ENST00000548296.1,ENST00000551293.1	2232.36	2012.26	779	14.42	12.14	779	0	14.31	12.65	12.8694	15.7639	0.0349112	11.3917	13.9526	0.0349214	chr12	47661249	47706061	47683655	-	protein_coding	KNOWN	RPAP3	7	17	0.238273	Decile 8	Vigintile 16	Expr 60-70%
ENSG00000005187.11	ENST00000289416.9,ENST00000440284.6,ENST00000501740.6,ENST00000561499.1,ENST00000561584.5,ENST00000561795.5,ENST00000562251.5,ENST00000563914.1,ENST00000564701.1,ENST00000567006.1,ENST00000567387.5,ENST00000567711.1,ENST00000568235.5,ENST00000569141.1,ENST00000614721.1	1563.41	1343.3	140.26	3.89	3.27	140.31	0.46	5.05	4.46	3.83252	6.34908	0.0876898	3.39016	5.61489	0.0876924	chr16	20610243	20797581	20703912	+	protein_coding	KNOWN	ACSM3	15	14	0.154886	Decile 8	Vigintile 16	Expr 30-40%
ENSG00000005189.19	ENST00000261377.10,ENST00000348433.10,ENST00000561474.1,ENST00000563045.1,ENST00000563068.1,ENST00000563617.1,ENST00000564200.1,ENST00000564274.5,ENST00000565340.5,ENST00000566276.5,ENST00000566518.5,ENST00000566993.5,ENST00000567297.5,ENST00000568046.5,ENST00000568334.1,ENST00000568476.5,ENST00000568501.5,ENST00000568647.5,ENST00000568894.5	1724.18	1504.09	177	4.38	3.69	177	0	5.96	5.27	4.63183	7.30022	0.0776421	4.09685	6.45758	0.077611	chr16	20806429	20849668	20828048	+	protein_coding	KNOWN	AC004381.6	19	20	0.185068	Decile 8	Vigintile 16	Expr 30-40%
ENSG00000005194.14	ENST00000394391.8,ENST00000563341.1,ENST00000563561.1,ENST00000564885.1,ENST00000565368.5,ENST00000565786.5,ENST00000565961.5,ENST00000566284.1,ENST00000567518.5,ENST00000567751.5,ENST00000568940.5,ENST00000569246.5,ENST00000569370.5,ENST00000569979.5,ENST00000570000.5	1898.33	1678.22	2544	56.47	47.53	2543.99	0.07	55.3	48.9	52.1861	58.5917	0.020022	46.1874	51.8488	0.0200055	chr16	57428169	57447528	57437848	-	protein_coding	KNOWN	CIAPIN1	15	9	0.476725	Decile 9	Vigintile 18	Expr 80-90%
ENSG00000005206.16	ENST00000585725.2,ENST00000586111.3,ENST00000586332.5,ENST00000587851.1,ENST00000589515.2,ENST00000593243.5,ENST00000610743.4,ENST00000612623.1,ENST00000613503.4,ENST00000614784.1,ENST00000614794.4,ENST00000618220.4,ENST00000621568.4,ENST00000622308.4	1728.53	1508.44	2077	51.3	43.17	2074.93	2.6	49.59	43.84	45.6154	53.621	0.0279382	40.4049	47.4935	0.0278835	chr19	2328615	2354806	2341710	+	protein_coding	KNOWN	SPPL2B	14	15	1.98254	Decile 10	Vigintile 20	Expr 80-90%
ENSG00000005238.19	ENST00000322813.9,ENST00000378557.1,ENST00000378561.5,ENST00000378566.5,ENST00000488109.6,ENST00000603301.5,ENST00000605104.1,ENST00000605244.5,ENST00000605392.1	2697.92	2477.81	324	4.87	4.1	324	0	4.94	4.37	4.22986	5.6994	0.0509338	3.74259	5.04237	0.0509042	chr9	35104112	35116341	35110226	-	protein_coding	KNOWN	FAM214B	9	10	1.29178	Decile 10	Vigintile 20	Expr 40-50%
ENSG00000005243.9	ENST00000579263.1,ENST00000580174.1,ENST00000580409.5,ENST00000581637.5,ENST00000581756.5,ENST00000583414.5,ENST00000584955.5,ENST00000585182.1,ENST00000612370.4,ENST00000621465.4	666.7	446.64	3	0.25	0.21	3	0	22.96	20.3	0.591495	66.6485	0.619572	0.56549	59.0091	0.619719	chr17	48026167	48038030	48032098	-	protein_coding	KNOWN	COPZ2	10	9	1.10249	Decile 10	Vigintile 20	Expr 10-20%
ENSG00000005249.12	ENST00000265717.4,ENST00000393613.6,ENST00000488792.1	3745	3524.89	1162	12.28	10.34	1162	0	12.14	10.73	11.1583	13.1609	0.0269778	9.88044	11.651	0.026973	chr7	107044649	107161811	107103230	+	protein_coding	KNOWN	PRKAR2B	3	11	-0.211283	Decile 6	Vigintile 11	Expr 50-60%
ENSG00000005302.17	ENST00000312196.8,ENST00000337339.6,ENST00000361672.6,ENST00000380691.2,ENST00000380692.6,ENST00000380693.7,ENST00000398527.6,ENST00000421368.2,ENST00000467141.1,ENST00000468149.5,ENST00000473380.1,ENST00000473806.5,ENST00000476743.5,ENST00000478462.5,ENST00000482871.5,ENST00000483645.5,ENST00000494268.1	2224.05	2003.95	389	7.23	6.09	389	0	8.6	7.6	7.23996	9.95664	0.0547696	6.43175	8.83549	0.0548006	chrX	11758159	11775753	11766956	+	protein_coding	KNOWN	MSL3	17	13	-0.252451	Decile 6	Vigintile 11	Expr 40-50%
ENSG00000005339.13	ENST00000262367.9,ENST00000382070.7,ENST00000570939.2,ENST00000571763.5,ENST00000571826.5,ENST00000572134.1,ENST00000572569.1,ENST00000573517.6,ENST00000573672.1,ENST00000574740.1,ENST00000575237.2,ENST00000576720.1,ENST00000634839.1	7890.36	7670.25	4411	21.42	18.03	4411	0	21.92	19.39	20.1684	23.7575	0.0282351	17.8241	21.0006	0.0281785	chr16	3725054	3880726	3802890	-	protein_coding	KNOWN	CREBBP	13	31	0.892844	Decile 10	Vigintile 19	Expr 60-70%
ENSG00000005379.15	ENST00000268893.10,ENST00000343736.8,ENST00000577871.1,ENST00000578486.1,ENST00000578511.5,ENST00000580669.5,ENST00000581675.5,ENST00000581692.2,ENST00000582679.1,ENST00000583624.1,ENST00000585149.1	1631.72	1411.64	474	12.51	10.53	474	0	12.68	11.21	10.7647	14.5969	0.0520259	9.52337	12.9152	0.0520713	chr17	58301228	58328760	58314994	-	protein_coding	KNOWN	BZRAP1	11	32	0.907159	Decile 10	Vigintile 19	Expr 50-60%
ENSG00000005381.7	ENST00000225275.3,ENST00000577220.1,ENST00000578493.1,ENST00000580005.1,ENST00000581022.1	967.4	747.47	0	0	0	0	0	1.35	1.2	0.128772	3.14249	0.42108	0.105731	2.77273	0.421067	chr17	58269856	58280935	58275395	-	protein_coding	KNOWN	MPO	5	12	0.673635	Decile 9	Vigintile 18	Non-expressed
ENSG00000005421.8	ENST00000222381.7,ENST00000433729.1,ENST00000462594.1,ENST00000470502.1	638.19	418.15	5	0.45	0.37	5	0	0.67	0.59	0.206606	1.16883	0.260743	0.186753	1.03797	0.2608	chr7	95297676	95324707	95311191	-	protein_coding	KNOWN	PON1	4	9	-0.467907	Decile 4	Vigintile 7	Expr 10-20%
ENSG00000005436.13	ENST00000321027.7,ENST00000409857.7,ENST00000427862.1,ENST00000442309.5,ENST00000470197.5,ENST00000470285.1,ENST00000470503.1,ENST00000472230.5,ENST00000486016.1,ENST00000492826.1,ENST00000541687.5	2092.17	1872.08	302	6.01	5.06	302	0	6.78	6	4.96572	8.66907	0.0951488	4.38116	7.65802	0.0952193	chr2	75652000	75710989	75681494	-	protein_coding	KNOWN	GCFC2	11	17	-0.206269	Decile 6	Vigintile 11	Expr 40-50%
ENSG00000005448.16	ENST00000348227.4,ENST00000409791.5,ENST00000426787.5,ENST00000461531.5,ENST00000465134.5,ENST00000468778.5,ENST00000469321.5,ENST00000469932.5,ENST00000475328.5,ENST00000480089.5,ENST00000482605.1,ENST00000482880.5,ENST00000493982.5	1037.52	817.42	1291	58.84	49.52	1291	0	57.23	50.61	53.3467	61.2227	0.0237589	47.172	54.132	0.0238184	chr2	74421678	74425755	74423716	+	protein_coding	KNOWN	WDR54	13	10	0.70346	Decile 10	Vigintile 19	Expr 80-90%
ENSG00000005469.11	ENST00000331536.7,ENST00000412227.6,ENST00000419147.6,ENST00000442291.1,ENST00000469785.1,ENST00000479014.1,ENST00000488850.1	2675.08	2454.97	160	2.43	2.04	160	0	2.87	2.54	2.22577	3.59814	0.0811091	1.9648	3.17868	0.0810921	chr7	87345681	87399795	87372738	+	protein_coding	KNOWN	CROT	7	19	-0.453882	Decile 4	Vigintile 7	Expr 30-40%
ENSG00000005471.15	ENST00000265723.8,ENST00000358400.7,ENST00000359206.7,ENST00000417608.1,ENST00000440025.1,ENST00000453593.5,ENST00000467079.1,ENST00000467983.1,ENST00000469770.1,ENST00000473795.1	3864.62	3644.51	33	0.34	0.28	33	0	0.86	0.76	0.441907	1.36173	0.18665	0.390553	1.20418	0.186543	chr7	87401697	87480435	87441066	-	protein_coding	KNOWN	ABCB4	10	28	-0.440388	Decile 4	Vigintile 7	Expr 10-20%
ENSG00000005483.19	ENST00000257745.8,ENST00000311117.7,ENST00000334884.9,ENST00000334914.11,ENST00000468607.1,ENST00000473063.1,ENST00000474203.5,ENST00000476671.5,ENST00000478079.1,ENST00000478990.5,ENST00000479838.2,ENST00000480368.5,ENST00000482560.6,ENST00000485619.1,ENST00000495267.5,ENST00000496191.1,ENST00000622386.1	3478.54	3258.44	1917	21.92	18.45	1917	0	22.43	19.83	20.132	24.9121	0.036746	17.8168	22.0485	0.0366899	chr7	105014179	105114361	105064270	+	protein_coding	KNOWN	KMT2E	17	27	-0.029541	Decile 7	Vigintile 14	Expr 70-80%
ENSG00000005486.16	ENST00000006777.10,ENST00000318622.8,ENST00000428119.1,ENST00000454791.1,ENST00000466232.5,ENST00000467406.2,ENST00000468304.1,ENST00000468644.5,ENST00000476218.1	1526.12	1306.01	819	23.36	19.66	819	0	34.04	30.1	21.5468	56.2245	0.187586	18.9756	49.6577	0.187537	chr7	75842602	75888926	75865764	+	protein_coding	KNOWN	RHBDD2	9	5	0.691122	Decile 10	Vigintile 19	Expr 70-80%
ENSG00000005513.9	ENST00000293894.3,ENST00000566034.1	3229.08	3008.96	207	2.56	2.16	207	0	2.44	2.16	2.10913	2.77886	0.0474667	1.8705	2.46311	0.0474857	chr16	981808	986979	984393	+	protein_coding	KNOWN	SOX8	2	3	1.80991	Decile 10	Vigintile 20	Expr 30-40%
ENSG00000005700.14	ENST00000306270.11,ENST00000369751.2,ENST00000445419.6,ENST00000471036.1,ENST00000503400.5,ENST00000503631.5,ENST00000505222.5,ENST00000508381.1,ENST00000510291.5,ENST00000610980.4	5439.51	5219.39	1125	8.03	6.76	1125	0	7.81	6.91	7.21566	8.4705	0.0279885	6.3887	7.49812	0.0279493	chr6	82169983	82247754	82208868	-	protein_coding	KNOWN	IBTK	10	29	-0.501133	Decile 3	Vigintile 6	Expr 40-50%
ENSG00000005801.16	ENST00000005082.13,ENST00000330692.11,ENST00000343338.11,ENST00000354599.10,ENST00000399602.8,ENST00000427810.6,ENST00000429541.6,ENST00000438262.6,ENST00000524857.5,ENST00000525313.6,ENST00000525502.5,ENST00000526501.5,ENST00000526540.5,ENST00000526598.1,ENST00000526601.5,ENST00000527386.1,ENST00000528218.5,ENST00000528410.5,ENST00000528636.1,ENST00000528796.5,ENST00000529085.5,ENST00000529228.5…	1389.14	1169.08	1497	47.7	40.15	1497	0	46.52	41.14	42.2929	50.9176	0.0319122	37.4454	45.0669	0.0319358	chr11	3339261	3379222	3359241	-	protein_coding	KNOWN	ZNF195	30	7	0.706719	Decile 10	Vigintile 19	Expr 80-90%
ENSG00000005810.17	ENST00000357337.10,ENST00000429715.1,ENST00000462987.2,ENST00000466564.2,ENST00000474882.2,ENST00000482517.5,ENST00000485061.2,ENST00000486679.2,ENST00000491491.1,ENST00000498073.2,ENST00000544440.6,ENST00000612956.4	3750.66	3530.57	2873	30.32	25.51	2869.6	2.84	29.74	26.3	26.9704	32.5966	0.0327988	23.8279	28.8045	0.0327896	chr13	77044655	77327050	77185852	-	protein_coding	KNOWN	MYCBP2	12	84	-0.468863	Decile 4	Vigintile 7	Expr 70-80%
ENSG00000005812.10	ENST00000355619.9,ENST00000417323.1,ENST00000470210.1,ENST00000472949.1,ENST00000477982.2,ENST00000485797.2	2670.74	2450.63	403.28	6.13	5.16	403.16	6.71	6.52	5.77	5.36299	7.72966	0.0612041	4.73931	6.83459	0.0610854	chr13	76992598	77027195	77009896	-	protein_coding	KNOWN	FBXL3	6	5	-0.307394	Decile 5	Vigintile 10	Expr 40-50%
ENSG00000005844.17	ENST00000356798.10,ENST00000358164.9,ENST00000433423.2,ENST00000562020.1,ENST00000562652.1,ENST00000562857.5,ENST00000563615.5,ENST00000564118.1,ENST00000564632.1,ENST00000564935.1,ENST00000565348.5,ENST00000565864.5,ENST00000566149.1,ENST00000566267.1,ENST00000568012.5,ENST00000568926.5,ENST00000568987.1,ENST00000569570.5,ENST00000569725.1	964	743.89	1	0.05	0.04	1	0	1.7	1.5	0.90787	2.5098	0.16577	0.793929	2.21124	0.165871	chr16	30472658	30523185	30497921	+	protein_coding	KNOWN	ITGAL	19	31	1.13821	Decile 10	Vigintile 20	Expr 0-10%
ENSG00000005882.11	ENST00000007708.7,ENST00000503076.1,ENST00000503176.5,ENST00000503614.5,ENST00000505440.5,ENST00000505897.5,ENST00000506242.5,ENST00000506647.1,ENST00000508030.5,ENST00000508960.1,ENST00000510219.2,ENST00000511026.1,ENST00000512204.5,ENST00000512238.1,ENST00000515040.5,ENST00000614357.4	2021.89	1801.8	860.74	17.8	14.98	858.71	5.54	18.54	16.39	15.9165	21.3518	0.0508281	14.0477	18.8544	0.0508924	chr17	50094737	50112152	50103444	+	protein_coding	KNOWN	PDK2	16	12	1.2409	Decile 10	Vigintile 20	Expr 60-70%
ENSG00000005884.17	ENST00000007722.11,ENST00000320031.12,ENST00000504417.1,ENST00000505306.5,ENST00000505552.1,ENST00000505612.1,ENST00000506401.6,ENST00000506437.1,ENST00000506827.1,ENST00000507771.5,ENST00000508100.1,ENST00000510809.1,ENST00000512553.5,ENST00000514834.1,ENST00000515147.1,ENST00000570989.1	2838.95	2618.85	1303	18.54	15.6	1303	0	22.33	19.75	17.2858	28.5205	0.0813118	15.2937	25.2363	0.0813779	chr17	50055968	50090481	50073224	+	protein_coding	KNOWN	ITGA3	16	26	1.05611	Decile 10	Vigintile 20	Expr 60-70%
ENSG00000005889.15	ENST00000304543.9,ENST00000338565.3,ENST00000379177.5,ENST00000379188.7,ENST00000419690.5,ENST00000428571.5,ENST00000459724.1,ENST00000474385.1,ENST00000480195.1,ENST00000497813.1,ENST00000539115.5	3030.03	2809.93	465	6.16	5.19	465	0	7.16	6.33	5.69001	8.81799	0.0742335	4.99492	7.764	0.0742285	chrX	24149173	24216255	24182714	+	protein_coding	KNOWN	ZFX	11	11	0.074195	Decile 8	Vigintile 15	Expr 40-50%
ENSG00000005893.15	ENST00000200639.8,ENST00000371335.4,ENST00000434600.6,ENST00000486593.5	2386.75	2166.64	901	15.49	13.04	901	0	14.81	13.1	13.5758	16.0489	0.0288018	12.0251	14.2102	0.0287431	chrX	120427827	120469365	120448596	-	protein_coding	KNOWN	LAMP2	4	9	-0.378684	Decile 5	Vigintile 9	Expr 60-70%
ENSG00000005961.17	ENST00000262407.5,ENST00000587295.5,ENST00000588098.1,ENST00000589645.5,ENST00000591990.5,ENST00000592075.5,ENST00000592226.5,ENST00000592253.5,ENST00000592462.5,ENST00000592944.1	1071.51	851.61	381	16.67	14.03	381	0	17.13	15.14	12.4827	22.3361	0.0989707	10.9661	19.6835	0.0989991	chr17	44372180	44389505	44380842	-	protein_coding	KNOWN	ITGA2B	10	30	1.58364	Decile 10	Vigintile 20	Expr 60-70%
ENSG00000005981.12	ENST00000257621.4,ENST00000325885.5,ENST00000428113.5	1984.67	1764.57	0	0	0	0	0	0.13	0.12	0.005583	0.333027	0.473768	0.00500369	0.294731	0.473715	chr7	95478444	95540232	95509338	+	protein_coding	KNOWN	ASB4	3	5	-0.315488	Decile 5	Vigintile 10	Non-expressed
ENSG00000006007.11	ENST00000353258.7,ENST00000563645.1,ENST00000564172.1,ENST00000569773.1,ENST00000569899.5	2267.6	2047.49	2084.89	37.93	31.93	2083.73	2.11	36.01	31.84	32.934	39.2561	0.0297164	29.1548	34.747	0.0297062	chr16	19501689	19522145	19511917	-	protein_coding	KNOWN	GDE1	5	6	0.290594	Decile 9	Vigintile 17	Expr 80-90%
ENSG00000006015.17	ENST00000358607.10,ENST00000450195.6,ENST00000595077.1,ENST00000595490.1,ENST00000597371.1,ENST00000598375.5,ENST00000600997.5,ENST00000601736.1	829.15	609.08	679.99	41.59	35.01	680	0.07	39.85	35.23	35.7981	43.8089	0.0348581	31.7258	38.8164	0.0348284	chr19	18588685	18592336	18590510	+	protein_coding	KNOWN	C19orf60	8	5	1.54097	Decile 10	Vigintile 20	Expr 80-90%
ENSG00000006016.10	ENST00000392386.7,ENST00000593286.1,ENST00000594325.1,ENST00000596360.1,ENST00000597131.1	964.52	744.47	149.52	7.48	6.3	149.58	1.68	7.79	6.89	5.93109	9.82274	0.0862113	5.22793	8.6687	0.0862169	chr19	18572220	18607741	18589980	-	protein_coding	KNOWN	CRLF1	5	9	1.5028	Decile 10	Vigintile 20	Expr 40-50%
ENSG00000006025.11	ENST00000007414.7,ENST00000392507.7,ENST00000578461.1,ENST00000579728.5,ENST00000580140.5,ENST00000580226.5,ENST00000580808.1,ENST00000583167.5,ENST00000584698.1,ENST00000585051.1,ENST00000613735.4	2529.57	2309.48	539	8.69	7.32	539	0	9	7.96	7.44473	10.6379	0.0622875	6.57569	9.4004	0.0622468	chr17	47807372	47821834	47814603	-	protein_coding	KNOWN	OSBPL7	11	24	1.05865	Decile 10	Vigintile 20	Expr 50-60%
ENSG00000006042.11	ENST00000261713.8,ENST00000394642.7,ENST00000395149.6,ENST00000439138.5,ENST00000578289.5,ENST00000579849.5,ENST00000582227.5,ENST00000583120.1,ENST00000583437.2	1250.11	1030.01	1949	70.49	59.33	1949	0	68.12	60.23	63.4104	72.9556	0.0242659	56.1346	64.5808	0.0242146	chr17	32927910	32945106	32936508	+	protein_coding	KNOWN	TMEM98	9	9	0.49194	Decile 9	Vigintile 18	Expr 80-90%
ENSG00000006047.12	ENST00000007699.9,ENST00000570627.1,ENST00000570720.1,ENST00000571127.1,ENST00000571464.1,ENST00000571485.5,ENST00000571834.5	1952.4	1732.29	1087	23.38	19.67	1087	0	22.85	20.21	20.3745	25.3973	0.0383272	18.0773	22.5207	0.0383619	chr17	7288252	7294615	7291433	-	protein_coding	KNOWN	YBX2	7	9	1.82944	Decile 10	Vigintile 20	Expr 70-80%
ENSG00000006059.3	ENST00000007735.3	1287	1066.89	0	0	0	0	0	0.03	0.03	2.63993e-06	0.0997357	0.66395	2.33075e-06	0.0882145	0.664001	chr17	41346092	41350812	41348452	-	protein_coding	KNOWN	KRT33A	1	7	0.813272	Decile 10	Vigintile 19	Non-expressed
ENSG00000006062.13	ENST00000344686.6,ENST00000376926.8,ENST00000586644.1,ENST00000592267.1,ENST00000617331.1	4090.63	3870.52	555.97	5.35	4.5	555.92	1.39	5.27	4.66	4.7289	5.83722	0.0361955	4.18418	5.1644	0.0361787	chr17	45263121	45317040	45290080	-	protein_coding	KNOWN	MAP3K14	5	16	1.04933	Decile 10	Vigintile 20	Expr 40-50%
ENSG00000006071.11	ENST00000302539.8,ENST00000389817.7,ENST00000524561.1,ENST00000525022.1,ENST00000526002.1,ENST00000526037.5,ENST00000526168.5,ENST00000526921.5,ENST00000527905.5,ENST00000528202.5,ENST00000528374.1,ENST00000529967.5,ENST00000530147.5,ENST00000531137.1,ENST00000531642.5,ENST00000531891.1,ENST00000531911.1,ENST00000532220.1,ENST00000532728.5,ENST00000612903.1	1345.59	1125.52	97	3.21	2.7	97	0	15.12	13.37	3.7254	36.4342	0.429891	3.14752	32.0973	0.430011	chr11	17392885	17476845	17434865	-	protein_coding	KNOWN	ABCC8	20	39	0.361202	Decile 9	Vigintile 17	Expr 30-40%
ENSG00000006116.3	ENST00000005284.3	3088	2867.89	3	0.04	0.03	3	0	0.05	0.04	0.00810673	0.0968422	0.335339	0.0072884	0.0857599	0.335107	chr16	24255553	24362801	24309177	+	protein_coding	KNOWN	CACNG3	1	4	0.339846	Decile 9	Vigintile 17	Expr 0-10%
ENSG00000006118.14	ENST00000005286.8,ENST00000453848.6,ENST00000534983.5,ENST00000535480.1,ENST00000536409.1,ENST00000536928.1,ENST00000537065.1,ENST00000537110.1,ENST00000538090.1,ENST00000540112.1,ENST00000540276.1,ENST00000543732.1,ENST00000544065.5,ENST00000544098.1	1948.69	1728.6	3330.95	71.79	60.42	3330.93	0.25	69.49	61.45	65.4638	73.6236	0.020228	57.98	65.1753	0.0201801	chr11	60924463	60937159	60930811	+	protein_coding	KNOWN	TMEM132A	14	11	1.22204	Decile 10	Vigintile 20	Expr 80-90%
ENSG00000006125.16	ENST00000587805.1,ENST00000588093.1,ENST00000588116.1,ENST00000589774.5,ENST00000590432.5,ENST00000590538.5,ENST00000591561.5,ENST00000591610.5,ENST00000592167.5,ENST00000593014.3,ENST00000610402.4,ENST00000612035.4,ENST00000612116.4,ENST00000614600.4,ENST00000616681.4,ENST00000616784.4,ENST00000618940.4,ENST00000619183.1,ENST00000620039.4,ENST00000621668.4,ENST00000621914.4,ENST00000628168.1	5088.26	4868.14	11604	88.8	74.74	11604	0.15	94.38	83.45	84.3481	111.741	0.048732	74.451	98.6629	0.0487049	chr17	35578046	35726409	35652227	+	protein_coding	KNOWN	AP2B1	22	22	0.436951	Decile 9	Vigintile 17	Expr 92-93%
ENSG00000006128.11	ENST00000319273.9,ENST00000346867.4,ENST00000350485.8,ENST00000491437.1,ENST00000495916.1	1081.2	861.1	44	1.9	1.6	44	0	2.17	1.92	1.52035	2.87338	0.1076	1.34977	2.54641	0.107634	chr7	97731908	97740472	97736190	+	protein_coding	KNOWN	TAC1	5	7	-0.424978	Decile 4	Vigintile 8	Expr 20-30%
ENSG00000006194.9	ENST00000219069.5,ENST00000538765.2,ENST00000572748.1,ENST00000573578.1,ENST00000574253.1,ENST00000574674.1,ENST00000575332.1,ENST00000575823.1	2298.14	2078.03	1165.5	20.89	17.59	1166.36	18.42	20.32	17.97	18.3876	22.3435	0.0336819	16.2619	19.7639	0.0336509	chr16	3263800	3301401	3282600	+	protein_coding	KNOWN	ZNF263	8	6	0.875468	Decile 10	Vigintile 19	Expr 60-70%
ENSG00000006210.6	ENST00000006053.6,ENST00000563383.1,ENST00000564948.1,ENST00000565912.1	3321	3100.89	134	1.61	1.35	134	0	1.71	1.51	1.34561	2.12988	0.0742035	1.18921	1.88275	0.0741737	chr16	57372458	57385048	57378753	+	protein_coding	KNOWN	CX3CL1	4	3	0.493155	Decile 9	Vigintile 18	Expr 20-30%
ENSG00000006282.20	ENST00000006658.10,ENST00000356488.8,ENST00000502911.5,ENST00000503063.5,ENST00000503127.5,ENST00000504265.5,ENST00000504271.1,ENST00000504334.5,ENST00000505085.5,ENST00000505336.1,ENST00000505456.6,ENST00000505559.5,ENST00000505656.5,ENST00000508528.1,ENST00000508598.5,ENST00000510917.5,ENST00000511347.5,ENST00000511605.1,ENST00000511845.5,ENST00000511937.5,ENST00000512181.5,ENST00000512416.5,EN…	1933.37	1713.26	772	16.79	14.13	772.83	1.07	17.96	15.88	16.0186	19.9489	0.038199	14.1777	17.6512	0.0380907	chr17	50543058	50555852	50549455	+	protein_coding	KNOWN	SPATA20	28	18	0.978357	Decile 10	Vigintile 19	Expr 60-70%
ENSG00000006283.17	ENST00000352832.9,ENST00000354983.8,ENST00000358244.9,ENST00000359106.9,ENST00000360761.8,ENST00000416767.8,ENST00000429973.6,ENST00000442258.6,ENST00000502264.5,ENST00000503436.5,ENST00000503485.5,ENST00000503607.5,ENST00000504076.5,ENST00000505165.5,ENST00000506406.5,ENST00000506520.1,ENST00000507336.5,ENST00000507510.6,ENST00000507609.5,ENST00000507896.5,ENST00000510115.5,ENST00000510366.5,ENS…	5469.03	5248.92	491.07	3.49	2.93	490.6	0.65	3.52	3.12	3.00871	4.06092	0.051172	2.65418	3.58454	0.0510941	chr17	50561068	50627474	50594271	+	protein_coding	KNOWN	CACNA1G	34	38	1.00863	Decile 10	Vigintile 19	Expr 30-40%
ENSG00000006327.13	ENST00000326577.8,ENST00000341627.5,ENST00000571351.1,ENST00000573001.5,ENST00000574699.1,ENST00000575124.1,ENST00000575836.1	1070.98	850.87	953	41.73	35.12	953	0	59.75	52.83	37.9981	98.6997	0.187192	33.4854	87.1846	0.187132	chr16	3018445	3022383	3020414	+	protein_coding	KNOWN	TNFRSF12A	7	4	1.83804	Decile 10	Vigintile 20	Expr 80-90%
ENSG00000006377.10	ENST00000493273.2,ENST00000518156.2,ENST00000555308.1	1527.33	1307.23	0	0	0	0	0	0.12	0.11	0.00837852	0.286284	0.438983	0.00740125	0.253239	0.438947	chr7	97005548	97011039	97008293	+	protein_coding	KNOWN	DLX6	3	3	-0.043455	Decile 7	Vigintile 14	Non-expressed
ENSG00000006432.15	ENST00000381250.8,ENST00000553414.5,ENST00000554024.1,ENST00000554146.1,ENST00000554752.6,ENST00000555993.6,ENST00000611979.4	9919.67	9699.56	2136	8.2	6.9	2136	0	7.98	7.05	7.4551	8.51542	0.0224837	6.59472	7.53215	0.0225131	chr14	70722526	70809534	70766030	-	protein_coding	KNOWN	MAP3K9	7	13	0.251099	Decile 8	Vigintile 16	Expr 40-50%
ENSG00000006451.7	ENST00000005257.6,ENST00000434466.1,ENST00000436179.1,ENST00000466491.1,ENST00000468201.1	2808.49	2588.37	1903	27.39	23.05	1903	0.05	26.8	23.7	25.2821	28.4333	0.0197926	22.3999	25.1852	0.0198137	chr7	39623483	39708124	39665803	+	protein_coding	KNOWN	RALA	5	5	-0.09254	Decile 7	Vigintile 13	Expr 70-80%
ENSG00000006453.13	ENST00000005260.8,ENST00000462558.5,ENST00000473569.1,ENST00000479789.1,ENST00000480580.1	3574.11	3354	2069.36	22.98	19.35	2069.11	0.94	22.12	19.56	21.0752	23.1583	0.0161694	18.6289	20.4665	0.0161191	chr7	98291651	98401068	98346359	-	protein_coding	KNOWN	BAIAP2L1	5	14	0.533231	Decile 9	Vigintile 18	Expr 70-80%
ENSG00000006459.10	ENST00000397560.6,ENST00000472616.1,ENST00000478996.1	6371.26	6151.16	546	3.31	2.78	546	0	3.26	2.88	2.34958	4.2293	0.103542	2.07661	3.73869	0.103512	chr7	140084746	140177035	140130890	-	protein_coding	KNOWN	KDM7A	3	20	-0.056303	Decile 7	Vigintile 13	Expr 30-40%
ENSG00000006468.13	ENST00000242066.9,ENST00000399357.7,ENST00000403527.5,ENST00000403685.5,ENST00000405192.6,ENST00000405218.6,ENST00000405358.8,ENST00000420159.6,ENST00000421381.5,ENST00000430479.5,ENST00000431887.5,ENST00000433547.1,ENST00000438956.5,ENST00000443137.5,ENST00000443608.5,ENST00000460438.5,ENST00000472931.6,ENST00000476355.5,ENST00000476720.6,ENST00000483075.1,ENST00000485475.1,ENST00000493831.1,ENS…	2311.26	2091.17	1794	31.96	26.9	1794	0	32.07	28.36	27.7381	36.1617	0.0449492	24.6264	32.0749	0.0450419	chr7	13891228	13991425	13941326	-	protein_coding	KNOWN	ETV1	23	15	-0.464303	Decile 4	Vigintile 7	Expr 70-80%
ENSG00000006530.15	ENST00000355413.8,ENST00000465241.5,ENST00000473247.5,ENST00000473884.5,ENST00000492693.5,ENST00000494053.1,ENST00000494688.1,ENST00000495028.5,ENST00000496273.1,ENST00000496784.1,ENST00000629555.2	2378.97	2158.85	770	13.29	11.18	770	0	13.88	12.27	12.2501	15.6694	0.0415839	10.8334	13.8606	0.0416121	chr7	141551189	141655244	141603216	+	protein_coding	KNOWN	AGK	11	17	-0.025949	Decile 7	Vigintile 14	Expr 50-60%
ENSG00000006534.15	ENST00000342456.10,ENST00000527514.1,ENST00000612297.4,ENST00000614849.4,ENST00000615368.4,ENST00000615463.4,ENST00000616697.1,ENST00000617288.4,ENST00000617449.4,ENST00000619675.4	3010.4	2790.3	36	0.48	0.4	36	0	0.88	0.78	0.535904	1.28157	0.14582	0.474291	1.13404	0.145854	chr11	68008578	68029282	68018930	+	protein_coding	KNOWN	ALDH3B1	10	10	1.25111	Decile 10	Vigintile 20	Expr 10-20%
ENSG00000006555.10	ENST00000371274.8,ENST00000371276.8,ENST00000448308.2,ENST00000474654.1,ENST00000488771.1	2338.95	2118.85	40	0.7	0.59	40	0	0.89	0.79	0.522967	1.28282	0.148932	0.463324	1.13564	0.148983	chr1	54779712	54801267	54790489	-	protein_coding	KNOWN	TTC22	5	7	0.228139	Decile 8	Vigintile 16	Expr 10-20%
ENSG00000006576.16	ENST00000248550.7,ENST00000275575.11,ENST00000307305.12,ENST00000415251.6,ENST00000416283.6,ENST00000422959.6,ENST00000424760.5,ENST00000450574.5,ENST00000454592.5,ENST00000468351.1,ENST00000470215.1,ENST00000479515.1	2716.34	2496.23	509	7.6	6.39	509	0	7.94	7.02	6.77269	9.22153	0.0510365	6.00491	8.17123	0.050979	chr7	77798792	77957503	77878147	+	protein_coding	KNOWN	PHTF2	12	20	-0.258223	Decile 6	Vigintile 11	Expr 40-50%
ENSG00000006606.8	ENST00000005180.8,ENST00000394905.2	529.48	309.46	91	10.96	9.22	91	0	10.47	9.26	8.29996	12.62	0.0712395	7.3479	11.1675	0.0712005	chr7	75769533	75789896	75779714	-	protein_coding	KNOWN	CCL26	2	4	0.960634	Decile 10	Vigintile 19	Expr 50-60%
ENSG00000006607.13	ENST00000264042.7,ENST00000373287.8,ENST00000412332.1,ENST00000413432.2,ENST00000418082.1,ENST00000422951.1,ENST00000444371.1,ENST00000445489.1,ENST00000464142.5,ENST00000467260.1,ENST00000470617.1,ENST00000471447.5,ENST00000473082.5,ENST00000473510.1,ENST00000476799.1,ENST00000478489.5,ENST00000479427.5,ENST00000485051.1,ENST00000486736.5,ENST00000491425.1,ENST00000492868.1,ENST00000496470.1,ENS…	3326.4	3106.3	996.65	11.95	10.06	997.46	3.38	14.89	13.16	12.4233	17.5994	0.0594223	10.9283	15.5061	0.0594618	chr2	241356243	241494841	241425542	+	protein_coding	KNOWN	FARP2	23	27	1.00944	Decile 10	Vigintile 19	Expr 50-60%
ENSG00000006611.15	ENST00000005226.11,ENST00000318024.8,ENST00000526181.1,ENST00000526313.5,ENST00000527020.5,ENST00000527551.1,ENST00000527720.5,ENST00000529563.5,ENST00000530700.1,ENST00000534556.1,ENST00000624811.1	1793.68	1573.57	47	1.11	0.94	47	0	3.27	2.89	1.26078	6.22955	0.263951	1.09891	5.49221	0.263704	chr11	17493895	17544416	17519155	-	protein_coding	KNOWN	USH1C	11	27	0.409059	Decile 9	Vigintile 17	Expr 20-30%
ENSG00000006625.17	ENST00000005374.10,ENST00000275428.8,ENST00000409144.5,ENST00000409390.5,ENST00000409436.2,ENST00000426081.5,ENST00000440082.5,ENST00000447901.1	1100.54	880.43	1611	68.17	57.37	1610.31	1.12	65	57.47	61.7377	68.2557	0.0173162	54.6172	60.3815	0.0172755	chr7	30496621	30504844	30500732	-	protein_coding	KNOWN	GGCT	8	4	0.229152	Decile 8	Vigintile 16	Expr 80-90%
ENSG00000006634.7	ENST00000265728.5,ENST00000413643.5,ENST00000430279.5,ENST00000431138.5,ENST00000486925.1,ENST00000495067.1,ENST00000498144.5,ENST00000498726.1	1689.91	1469.82	796.74	20.19	17	796.68	0.6	19.82	17.53	16.9078	22.9144	0.0524409	14.9759	20.2902	0.0523871	chr7	87876216	87909541	87892878	+	protein_coding	KNOWN	DBF4	8	12	-0.314502	Decile 5	Vigintile 10	Expr 60-70%
ENSG00000006638.11	ENST00000375190.8,ENST00000411851.3,ENST00000587717.1,ENST00000589966.1	1691.59	1471.48	14	0.35	0.3	14	0	0.54	0.47	0.244476	0.888475	0.208714	0.214712	0.78451	0.208672	chr19	3594506	3606840	3600673	-	protein_coding	KNOWN	TBXA2R	4	4	1.65912	Decile 10	Vigintile 20	Expr 10-20%
ENSG00000006652.13	ENST00000005558.8,ENST00000403825.7,ENST00000417662.1,ENST00000421296.1,ENST00000429071.5,ENST00000432734.1,ENST00000440625.5,ENST00000443101.6,ENST00000445335.1,ENST00000462155.2,ENST00000466459.5,ENST00000470441.1,ENST00000476927.5,ENST00000486688.1,ENST00000489994.5,ENST00000535603.5,ENST00000621379.4	2266.22	2046.1	1237	22.52	18.96	1237	0	23.29	20.59	21.5349	25.1142	0.0263019	19.0863	22.248	0.0263369	chr7	112422968	112481017	112451992	+	protein_coding	KNOWN	IFRD1	17	13	-0.343198	Decile 5	Vigintile 9	Expr 70-80%
ENSG00000006659.12	ENST00000360675.7,ENST00000392052.7,ENST00000601802.1	774	553.9	15	1.01	0.85	15	0	1.31	1.16	0.68491	1.99488	0.171192	0.603672	1.76215	0.171196	chr19	39704306	39709444	39706875	+	protein_coding	KNOWN	LGALS14	3	5	0.786574	Decile 10	Vigintile 19	Expr 20-30%
ENSG00000006695.10	ENST00000261643.7,ENST00000429152.6,ENST00000580561.1,ENST00000581931.5	2751.95	2531.84	712.99	10.49	8.83	712.6	0.49	10.15	8.97	9.2917	11.0326	0.0294311	8.22002	9.7601	0.0294283	chr17	14069496	14208677	14139086	+	protein_coding	KNOWN	COX10	4	7	-0.089242	Decile 7	Vigintile 13	Expr 50-60%
ENSG00000006704.10	ENST00000265755.7,ENST00000424337.6,ENST00000455841.6,ENST00000470715.1,ENST00000476977.5,ENST00000486086.1,ENST00000489094.1	2319.86	2099.78	1684	29.88	25.15	1684	0	28.78	25.45	25.2569	32.217	0.0415237	22.3658	28.5265	0.0414816	chr7	74453790	74602604	74528197	+	protein_coding	KNOWN	GTF2IRD1	7	27	1.08089	Decile 10	Vigintile 20	Expr 70-80%
ENSG00000006712.14	ENST00000221265.7,ENST00000416728.3,ENST00000595379.1,ENST00000595564.5,ENST00000595797.5,ENST00000597365.1,ENST00000598127.1,ENST00000598594.1	2064.43	1844.32	1444.07	29.17	24.55	1444.05	0.23	29.24	25.86	27.0999	31.4392	0.024737	23.9897	27.8229	0.024747	chr19	39385852	39391195	39388523	-	protein_coding	KNOWN	PAF1	8	14	1.55151	Decile 10	Vigintile 20	Expr 70-80%
ENSG00000006715.15	ENST00000265745.13,ENST00000310301.8,ENST00000395969.6,ENST00000413141.5,ENST00000414632.5,ENST00000418457.6,ENST00000439468.1,ENST00000448833.5,ENST00000457055.1,ENST00000462429.1,ENST00000466017.1,ENST00000482217.1,ENST00000485955.1,ENST00000490924.1	3509.89	3289.81	1678	19	15.99	1678	0	21.31	18.84	17.7362	25.0184	0.0591446	15.7213	22.1613	0.0592725	chr7	38722963	38932394	38827678	-	protein_coding	KNOWN	VPS41	14	29	-0.3731	Decile 5	Vigintile 9	Expr 60-70%
ENSG00000006740.16	ENST00000262444.13,ENST00000340825.7,ENST00000379672.9,ENST00000538915.2,ENST00000544416.6,ENST00000578087.1,ENST00000578442.1,ENST00000580768.5,ENST00000581437.1,ENST00000583608.1,ENST00000584974.1,ENST00000616670.4	3986.6	3766.49	1014.27	10.03	8.44	1011.67	3.26	10.2	9.02	9.30228	11.1504	0.0309791	8.2302	9.86615	0.0309725	chr17	12789539	12991643	12890591	+	protein_coding	KNOWN	ARHGAP44	12	22	0.170415	Decile 8	Vigintile 16	Expr 50-60%
ENSG00000006744.18	ENST00000338034.8,ENST00000395962.6,ENST00000426905.7,ENST00000446899.5,ENST00000465825.5,ENST00000476042.1,ENST00000480891.5,ENST00000484122.5,ENST00000487229.6,ENST00000491478.5,ENST00000492559.5,ENST00000578071.1,ENST00000578104.1,ENST00000578991.5,ENST00000580504.5,ENST00000581499.6,ENST00000583371.5,ENST00000584650.5,ENST00000609101.5,ENST00000609345.1,ENST00000609757.5	2514.17	2294.07	4528	73.53	61.89	4528	0	72.31	63.94	67.6156	77.3323	0.0235369	59.8178	68.4038	0.023537	chr17	12992391	13018187	13005289	-	protein_coding	KNOWN	ELAC2	21	24	0.753371	Decile 10	Vigintile 19	Expr 90-91%
ENSG00000006747.14	ENST00000297029.9,ENST00000341757.9,ENST00000417018.1,ENST00000436854.1,ENST00000473722.5,ENST00000476649.1,ENST00000486980.5,ENST00000518849.1,ENST00000519209.5,ENST00000523729.5	2748.79	2528.68	78	1.15	0.97	78	0	1.86	1.64	1.26249	2.51116	0.117341	1.11622	2.22125	0.11717	chr7	12570577	12660179	12615378	+	protein_coding	KNOWN	SCIN	10	16	-0.430131	Decile 4	Vigintile 8	Expr 20-30%
ENSG00000006756.15	ENST00000217890.10,ENST00000381154.5,ENST00000458014.1,ENST00000481340.1,ENST00000494870.5,ENST00000495294.1,ENST00000559324.1	3183.62	2963.55	129	1.62	1.36	128.59	0.68	2.3	2.03	1.40646	3.33339	0.145529	1.24184	2.94604	0.145636	chrX	2903970	2929351	2916660	-	protein_coding	KNOWN	ARSD	7	10	0.64237	Decile 9	Vigintile 18	Expr 20-30%
ENSG00000006757.11	ENST00000381042.8,ENST00000442940.1,ENST00000444736.5,ENST00000537427.5	1209.89	989.81	298	11.22	9.44	298	0	10.74	9.5	9.0021	12.6188	0.0581911	7.95043	11.1492	0.0582166	chrX	7898247	7927739	7912993	-	protein_coding	KNOWN	PNPLA4	4	7	-0.472162	Decile 4	Vigintile 7	Expr 50-60%
ENSG00000006788.12	ENST00000252172.8,ENST00000418404.7,ENST00000621918.1	6296	6075.89	1	0.01	0.01	1	0	0.02	0.02	0.00406163	0.0477247	0.335534	0.0036736	0.0422896	0.335383	chr17	10298084	10373130	10335607	-	protein_coding	KNOWN	MYH13	3	41	0.224691	Decile 8	Vigintile 16	Expr 0-10%
ENSG00000006831.9	ENST00000357103.4,ENST00000535774.1,ENST00000537190.1,ENST00000537545.1,ENST00000540974.1,ENST00000543456.1,ENST00000544470.1	3945.84	3725.73	2208	22.08	18.58	2208	0	21.89	19.35	20.6465	23.2248	0.0198681	18.2663	20.5444	0.0198505	chr12	1688574	1788678	1738626	+	protein_coding	KNOWN	ADIPOR2	7	8	0.155857	Decile 8	Vigintile 16	Expr 70-80%
ENSG00000006837.11	ENST00000265334.8,ENST00000518990.5,ENST00000519312.5,ENST00000520592.1,ENST00000520693.5,ENST00000521118.5,ENST00000521755.1,ENST00000522501.1,ENST00000523054.5,ENST00000523832.1	826.35	606.29	19.77	1.21	1.02	21.17	1.8	1.84	1.63	1.06868	2.71095	0.157515	0.947777	2.40163	0.157459	chr5	134286350	134371047	134328698	-	protein_coding	KNOWN	CDKL3	10	13	0.114706	Decile 8	Vigintile 15	Expr 20-30%
ENSG00000007001.12	ENST00000005756.4,ENST00000460456.1,ENST00000489438.1,ENST00000605860.5	1640.75	1420.64	0	0	0	0	0	0.13	0.12	0.0184189	0.274575	0.36836	0.0155489	0.242132	0.368372	chr2	157876702	158136154	158006428	+	protein_coding	KNOWN	UPP2	4	10	-0.519647	Decile 3	Vigintile 6	Non-expressed
ENSG00000007038.10	ENST00000005995.7,ENST00000450020.7,ENST00000570594.5,ENST00000570629.5,ENST00000571141.1,ENST00000574265.1,ENST00000574813.5,ENST00000575199.1,ENST00000575739.1,ENST00000577043.1	872.85	652.76	7	0.4	0.34	7	0	1.22	1.08	0.592843	1.92664	0.190035	0.523101	1.70372	0.189884	chr16	2817180	2826304	2821742	+	protein_coding	KNOWN	PRSS21	10	6	1.31289	Decile 10	Vigintile 20	Expr 10-20%
ENSG00000007047.14	ENST00000262891.8,ENST00000300843.8,ENST00000587566.5,ENST00000588533.5,ENST00000588621.5,ENST00000590897.1,ENST00000590909.1,ENST00000592207.5,ENST00000592762.5,ENST00000620044.4,ENST00000622871.1	2623.31	2403.21	1983.42	30.75	25.88	1983.43	0.5	31.19	27.58	27.4517	34.9398	0.0415408	24.3059	30.9284	0.0416297	chr19	45079288	45305283	45192285	+	protein_coding	KNOWN	MARK4	11	18	1.48319	Decile 10	Vigintile 20	Expr 70-80%
ENSG00000007062.11	ENST00000447510.6,ENST00000502501.1,ENST00000502943.1,ENST00000503884.5,ENST00000504842.5,ENST00000505450.5,ENST00000508167.5,ENST00000508322.1,ENST00000508940.1,ENST00000510224.5,ENST00000511153.5,ENST00000511270.1,ENST00000512304.2,ENST00000513108.1,ENST00000513448.5,ENST00000513946.1,ENST00000514693.5,ENST00000514967.5,ENST00000539194.5,ENST00000540805.5	3510.42	3290.32	3180	36	30.3	3180	0	36.45	32.23	33.467	39.5897	0.0298136	29.6339	35.0523	0.0298264	chr4	15963076	16084378	16023727	-	protein_coding	KNOWN	PROM1	20	28	-0.076905	Decile 7	Vigintile 13	Expr 80-90%
ENSG00000007080.10	ENST00000445755.6,ENST00000596123.1,ENST00000597436.5,ENST00000602080.1	962.2	742.08	1799	90.31	76.01	1799	0	85.78	75.84	81.7155	89.893	0.0164697	72.2744	79.4911	0.0164518	chr19	17933016	17943991	17938503	+	protein_coding	KNOWN	CCDC124	4	5	1.40518	Decile 10	Vigintile 20	Expr 92-93%
ENSG00000007129.17	ENST00000187608.13,ENST00000401445.3,ENST00000407170.6,ENST00000457737.5,ENST00000482870.6,ENST00000618577.4,ENST00000632983.1	710	489.91	1	0.08	0.06	1	0	0.43	0.38	0.121327	0.816587	0.287487	0.107845	0.72267	0.28748	chr19	41549518	41586844	41568181	+	protein_coding	KNOWN	CEACAM21	7	8	0.594881	Decile 9	Vigintile 18	Expr 0-10%
ENSG00000007168.12	ENST00000397193.7,ENST00000397195.9,ENST00000570400.1,ENST00000571289.1,ENST00000571495.1,ENST00000572915.6,ENST00000574213.1,ENST00000574468.1,ENST00000574816.5,ENST00000575477.5,ENST00000576586.5,ENST00000609078.1,ENST00000610190.1	2051.4	1831.3	4008	81.53	68.62	4007.72	0.6	78.29	69.22	73.0898	83.4249	0.0225092	64.634	73.7849	0.0225886	chr17	2593210	2685615	2639412	+	protein_coding	KNOWN	PAFAH1B1	13	11	0.975418	Decile 10	Vigintile 19	Expr 91-92%
ENSG00000007171.16	ENST00000313735.10,ENST00000621962.1	4176	3955.89	83	0.78	0.66	83	0	0.77	0.68	0.609625	0.941723	0.0740023	0.539725	0.833471	0.0739175	chr17	27756766	27800499	27778632	-	protein_coding	KNOWN	NOS2	2	27	0.57945	Decile 9	Vigintile 18	Expr 20-30%
ENSG00000007174.17	ENST00000262442.8,ENST00000396001.6,ENST00000454412.6,ENST00000578834.1,ENST00000579406.1,ENST00000579602.1,ENST00000579703.1,ENST00000579813.1,ENST00000579828.5,ENST00000580255.1,ENST00000581682.1,ENST00000583192.1,ENST00000584663.1,ENST00000585197.1,ENST00000608377.5	2654.03	2433.94	29	0.44	0.37	29	0	1.66	1.47	0.796898	2.679	0.196908	0.710432	2.37491	0.196832	chr17	11598431	11969748	11784089	+	protein_coding	KNOWN	DNAH9	15	69	0.016993	Decile 7	Vigintile 14	Expr 10-20%
ENSG00000007202.14	ENST00000389003.7,ENST00000528896.6,ENST00000544884.5,ENST00000577261.1,ENST00000577417.5,ENST00000577580.1,ENST00000579253.1,ENST00000579924.6,ENST00000580395.1,ENST00000580882.5,ENST00000581064.1,ENST00000581267.1,ENST00000582417.1,ENST00000582901.1,ENST00000583403.5,ENST00000583860.1	6402.56	6182.45	8794.91	53	44.6	8794.51	1.32	53.07	46.92	49.8495	56.5096	0.0216043	44.1103	49.9981	0.0215683	chr17	28614440	28645454	28629947	-	protein_coding	KNOWN	KIAA0100	16	39	1.35424	Decile 10	Vigintile 20	Expr 80-90%
ENSG00000007216.14	ENST00000314669.9,ENST00000444914.7,ENST00000459818.2,ENST00000541739.6,ENST00000545060.2,ENST00000577903.5,ENST00000579281.5	2153.57	1933.46	0	0	0	0	0	0.15	0.13	0.0428816	0.263395	0.270841	0.0377399	0.232767	0.270668	chr17	28473293	28497781	28485537	+	protein_coding	KNOWN	SLC13A2	7	14	0.994618	Decile 10	Vigintile 19	Non-expressed
ENSG00000007237.18	ENST00000323816.8,ENST00000396115.6,ENST00000432992.6,ENST00000437099.6,ENST00000542249.5,ENST00000578456.1,ENST00000578599.5,ENST00000578655.1,ENST00000579140.5,ENST00000579158.5,ENST00000580043.1,ENST00000580811.5,ENST00000580865.5,ENST00000581112.5,ENST00000581871.5,ENST00000583882.5,ENST00000584146.6,ENST00000584389.5,ENST00000585266.5	7615.56	7395.45	872	4.39	3.7	872	0	6.32	5.59	5.23369	7.50488	0.0630822	4.66677	6.67561	0.0631013	chr17	9910609	10198551	10054580	-	protein_coding	KNOWN	GAS7	19	15	0.344994	Decile 9	Vigintile 17	Expr 30-40%
ENSG00000007255.10	ENST00000006275.8,ENST00000585934.1,ENST00000587818.1,ENST00000588062.5,ENST00000592647.1	708.83	488.75	734	55.95	47.09	734	0	53.54	47.34	49.4128	57.6902	0.0268782	43.7425	51.0586	0.026838	chr19	45162928	45178237	45170582	-	protein_coding	KNOWN	TRAPPC6A	5	6	1.56922	Decile 10	Vigintile 20	Expr 80-90%
ENSG00000007264.13	ENST00000310132.10,ENST00000395040.6,ENST00000395045.6,ENST00000585778.5,ENST00000587180.1,ENST00000588983.5,ENST00000590028.5,ENST00000590493.5,ENST00000590821.1,ENST00000590849.1,ENST00000590980.1,ENST00000591059.1,ENST00000592300.1,ENST00000592612.1,ENST00000612526.4,ENST00000619596.4	1748.44	1528.33	519	12.65	10.65	519	0	13.29	11.75	11.7003	14.8753	0.0414069	10.3455	13.1543	0.0413455	chr19	3777970	3802129	3790049	-	protein_coding	KNOWN	MATK	16	17	1.77723	Decile 10	Vigintile 20	Expr 50-60%
ENSG00000007306.14	ENST00000006724.7,ENST00000401731.5,ENST00000599715.1,ENST00000602225.1	1197.75	977.68	0	0	0	0	0	0.28	0.24	0.0275584	0.594376	0.39103	0.0243308	0.525728	0.390878	chr19	41673307	41706976	41690141	-	protein_coding	KNOWN	CEACAM7	4	5	0.547352	Decile 9	Vigintile 18	Non-expressed
ENSG00000007312.12	ENST00000006750.7,ENST00000349817.2,ENST00000392795.7,ENST00000558969.1,ENST00000559358.1,ENST00000583260.1	1028.13	808.07	30	1.38	1.16	30	0	1.94	1.71	1.08028	2.87633	0.160132	0.959745	2.54871	0.160069	chr17	63928740	63932354	63930547	-	protein_coding	KNOWN	CD79B	6	6	1.09992	Decile 10	Vigintile 20	Expr 20-30%
ENSG00000007314.11	ENST00000435607.3,ENST00000578147.5,ENST00000581514.1,ENST00000584310.1	3970.58	3750.51	682	6.77	5.7	682	0	6.7	5.93	5.5093	8.03521	0.0646953	4.88074	7.11379	0.0647276	chr17	63938554	63972918	63955736	-	protein_coding	KNOWN	SCN4A	4	24	1.24738	Decile 10	Vigintile 20	Expr 40-50%
ENSG00000007341.18	ENST00000343210.11,ENST00000358039.8,ENST00000360743.8,ENST00000361846.7,ENST00000369664.1,ENST00000369666.5,ENST00000369669.5,ENST00000418497.5,ENST00000459630.5,ENST00000463235.5,ENST00000466360.5,ENST00000467335.5,ENST00000470519.5,ENST00000470683.1,ENST00000473206.5,ENST00000477332.5,ENST00000477682.1,ENST00000479436.5,ENST00000480988.5,ENST00000485753.5,ENST00000490067.5,ENST00000490715.5,EN…	1554.85	1334.74	216.66	6.05	5.09	216.57	3.93	8.64	7.64	6.838	10.5127	0.0721171	6.08049	9.33128	0.0721356	chr1	112523518	112620825	112572171	-	protein_coding	KNOWN	ST7L	28	17	0.229322	Decile 8	Vigintile 16	Expr 40-50%
ENSG00000007350.16	ENST00000369912.2,ENST00000369915.7,ENST00000426203.5,ENST00000426989.5,ENST00000439635.5,ENST00000463884.1,ENST00000465168.1,ENST00000482044.1	1059.5	839.45	0	0	0	0	0	0.7	0.62	0.220011	1.26509	0.2689	0.196807	1.12158	0.268831	chrX	154295671	154330350	154313010	+	protein_coding	KNOWN	TKTL1	8	13	1.3896	Decile 10	Vigintile 20	Non-expressed
ENSG00000007372.20	ENST00000241001.12,ENST00000379107.6,ENST00000379109.6,ENST00000379111.6,ENST00000379115.8,ENST00000379123.9,ENST00000379129.6,ENST00000379132.7,ENST00000419022.5,ENST00000423822.6,ENST00000438681.5,ENST00000455099.5,ENST00000464174.5,ENST00000470027.6,ENST00000471303.5,ENST00000474783.1,ENST00000481563.5,ENST00000494377.6,ENST00000524853.5,ENST00000525535.1,ENST00000527769.5,ENST00000530373.5,EN…	1410.01	1189.98	28	0.88	0.74	28	0	2.9	2.56	1.89226	3.97984	0.126639	1.67393	3.52035	0.126462	chr11	31784792	31817961	31801376	-	protein_coding	KNOWN	PAX6	31	14	-0.023775	Decile 7	Vigintile 14	Expr 20-30%
ENSG00000007376.7	ENST00000007264.6,ENST00000561734.5,ENST00000562070.1,ENST00000563560.1,ENST00000565377.1,ENST00000565503.5,ENST00000565809.5,ENST00000567114.5,ENST00000567283.5,ENST00000569601.5	1850.49	1630.38	1074	24.54	20.65	1074	0	23.95	21.17	22.2727	25.5887	0.0238873	19.7183	22.6489	0.0238696	chr16	784974	788397	786685	-	protein_coding	KNOWN	RPUSD1	10	6	2.13598	Decile 10	Vigintile 20	Expr 70-80%
ENSG00000007384.15	ENST00000262316.10,ENST00000417043.5,ENST00000419764.1,ENST00000428730.5,ENST00000448893.1,ENST00000450643.5,ENST00000472390.1,ENST00000482904.1,ENST00000486045.1,ENST00000487201.1,ENST00000493647.1	1839.5	1619.39	1404	32.3	27.18	1404	0	31.98	28.28	29.4947	34.5519	0.0273393	26.056	30.5285	0.0273679	chr16	58059	76355	67207	-	protein_coding	KNOWN	RHBDF1	11	18	1.60346	Decile 10	Vigintile 20	Expr 70-80%
ENSG00000007392.16	ENST00000293872.12,ENST00000337351.8,ENST00000397780.5,ENST00000397783.5,ENST00000418978.5,ENST00000419516.5,ENST00000426094.5,ENST00000428363.1,ENST00000429378.5,ENST00000430864.5,ENST00000442701.1,ENST00000443357.5,ENST00000464711.5,ENST00000467552.1,ENST00000468732.5,ENST00000469109.1,ENST00000490762.5,ENST00000494366.5,ENST00000494545.1,ENST00000495349.5,ENST00000629543.2	1477.29	1257.19	2259	66.94	56.34	2259	0	66.38	58.69	61.7746	71.0376	0.0238616	54.6037	62.8061	0.0238493	chr16	188969	229463	209216	-	protein_coding	KNOWN	LUC7L	21	11	1.57638	Decile 10	Vigintile 20	Expr 80-90%
ENSG00000007402.11	ENST00000266039.7,ENST00000360963.7,ENST00000423994.6,ENST00000424201.6,ENST00000429770.5,ENST00000479441.1,ENST00000483620.1,ENST00000487413.1	4710.79	4490.68	1642	13.62	11.46	1642	0	13.1	11.58	12.2983	13.9011	0.0212869	10.9018	12.3179	0.0212447	chr3	50362799	50504244	50433521	-	protein_coding	KNOWN	CACNA2D2	8	39	1.33674	Decile 10	Vigintile 20	Expr 50-60%
ENSG00000007516.13	ENST00000324385.9,ENST00000397488.6,ENST00000421665.6,ENST00000426824.7,ENST00000561602.1,ENST00000561793.1,ENST00000562208.5,ENST00000564213.1,ENST00000565665.5,ENST00000566162.1,ENST00000566389.1,ENST00000567203.1,ENST00000567825.3,ENST00000568198.1,ENST00000568887.5,ENST00000628027.2	3019.46	2799.42	281.11	3.74	3.15	281.11	0.33	4.98	4.4	3.60377	6.55678	0.102823	3.18575	5.79967	0.102796	chr16	1333601	1349441	1341521	+	protein_coding	KNOWN	BAIAP3	16	34	1.93049	Decile 10	Vigintile 20	Expr 30-40%
ENSG00000007520.3	ENST00000007390.2,ENST00000566296.1	1210.47	990.36	1037.89	39.04	32.86	1037.89	0.33	37.13	32.83	34.7267	39.4976	0.0220129	30.7043	34.9191	0.0220099	chr16	1349240	1351911	1350575	-	protein_coding	KNOWN	TSR3	2	6	1.92246	Decile 10	Vigintile 20	Expr 80-90%
ENSG00000007541.15	ENST00000026218.9,ENST00000293874.2,ENST00000321878.9,ENST00000409527.6,ENST00000420990.6,ENST00000422307.6,ENST00000439574.1,ENST00000443147.5,ENST00000470411.2,ENST00000476438.1,ENST00000480424.6,ENST00000537901.1,ENST00000540241.1,ENST00000540548.1,ENST00000544860.1,ENST00000634341.1,ENST00000635205.1	2027.33	1807.22	1316.47	27.14	22.84	1314.26	4.87	36.3	32.1	25.2808	55.6852	0.147819	22.3189	49.2114	0.147735	chr16	566995	584136	575565	+	protein_coding	KNOWN	PIGQ	17	12	2.02841	Decile 10	Vigintile 20	Expr 70-80%
ENSG00000007545.15	ENST00000293925.9,ENST00000397412.7,ENST00000415022.1,ENST00000466562.5,ENST00000467286.1,ENST00000468839.1,ENST00000492778.5,ENST00000498594.5	5332.52	5112.43	2054.34	14.97	12.6	2052.44	12.98	14.99	13.25	13.3077	16.6781	0.0388814	11.8087	14.7872	0.0388958	chr16	1612325	1677908	1645116	+	protein_coding	KNOWN	CRAMP1	8	21	1.69909	Decile 10	Vigintile 20	Expr 60-70%
ENSG00000007866.18	ENST00000338863.11,ENST00000402886.7,ENST00000433586.1	2769.96	2549.85	1362	19.9	16.75	1362	0	19.06	16.85	17.6562	20.5516	0.0259426	15.6178	18.1767	0.0258789	chr6	35473597	35497076	35485336	-	protein_coding	KNOWN	TEAD3	3	13	1.46344	Decile 10	Vigintile 20	Expr 60-70%
ENSG00000007908.15	ENST00000333360.11,ENST00000367774.1,ENST00000367775.5,ENST00000367776.5,ENST00000367777.5,ENST00000461085.1,ENST00000609271.1	2433.14	2213.05	0	0	0	0	0	0.28	0.25	0.0506758	0.582213	0.357171	0.0437068	0.513995	0.357069	chr1	169722641	169764705	169743673	-	protein_coding	KNOWN	SELE	7	14	-0.325996	Decile 5	Vigintile 9	Non-expressed
ENSG00000007923.15	ENST00000294401.11,ENST00000377577.9,ENST00000426784.1,ENST00000451196.5,ENST00000460594.5,ENST00000465508.5,ENST00000465911.1,ENST00000469318.5,ENST00000472414.1,ENST00000473993.5,ENST00000485073.5	2893.83	2673.72	4013.34	55.92	47.06	4009.65	20.74	54.94	48.58	51.5256	58.3899	0.0216557	45.5884	51.647	0.0216406	chr1	6634168	6701924	6668046	-	protein_coding	KNOWN	DNAJC11	11	16	0.881599	Decile 10	Vigintile 19	Expr 80-90%
ENSG00000007933.12	ENST00000367755.8,ENST00000472784.5,ENST00000478457.1,ENST00000479749.1,ENST00000530212.5,ENST00000534514.1	1012.5	792.41	0	0	0	0	0	0.35	0.31	0.0880405	0.661392	0.296336	0.0767258	0.584016	0.296193	chr1	171090877	171117819	171104348	+	protein_coding	KNOWN	FMO3	6	9	-0.341202	Decile 5	Vigintile 9	Non-expressed
ENSG00000007944.14	ENST00000349606.4,ENST00000356840.7	2130.09	1909.98	935	18.24	15.35	935	0	17.29	15.29	16.0959	18.4818	0.0236723	14.2474	16.3563	0.0236385	chr6	16129125	16148248	16138686	+	protein_coding	KNOWN	MYLIP	2	7	-0.079575	Decile 7	Vigintile 13	Expr 60-70%
ENSG00000007952.17	ENST00000217885.5,ENST00000372960.8,ENST00000372964.5,ENST00000372966.7,ENST00000427768.5	1607.4	1387.3	0	0	0	0	0	0.21	0.18	0.0336177	0.431904	0.354218	0.0297657	0.382158	0.354293	chrX	100843324	100874345	100858834	-	protein_coding	KNOWN	NOX1	5	13	-0.346537	Decile 5	Vigintile 9	Non-expressed
ENSG00000007968.6	ENST00000361729.2,ENST00000487237.1	5191	4970.89	387	2.9	2.44	387	0	2.89	2.55	2.52363	3.2793	0.0427504	2.22801	2.89657	0.0427721	chr1	23506430	23531220	23518825	-	protein_coding	KNOWN	E2F2	2	7	1.00943	Decile 10	Vigintile 19	Expr 30-40%
ENSG00000008018.8	ENST00000262193.6,ENST00000462957.1	931.86	711.75	6347	332.21	279.61	6347	0	314.41	278	306.793	322.335	0.00856047	271.429	285.068	0.00847961	chr6	170535117	170553341	170544229	-	protein_coding	KNOWN	PSMB1	2	6	0.103934	Decile 8	Vigintile 15	Expr 98-99%
ENSG00000008056.12	ENST00000295987.11,ENST00000340666.4	3185.81	2965.69	563	7.07	5.95	563	0	6.72	5.94	6.16903	7.27646	0.0288236	5.45549	6.43339	0.028769	chrX	47571898	47619853	47595875	-	protein_coding	KNOWN	SYN1	2	13	1.17552	Decile 10	Vigintile 20	Expr 40-50%
ENSG00000008083.13	ENST00000341776.6,ENST00000397311.4,ENST00000474854.1	5656.83	5436.72	11987.2	82.14	69.13	11987.2	0.49	77.86	68.84	76.373	79.317	0.00647747	67.5982	70.1783	0.00641572	chr6	15246296	15522040	15384168	+	protein_coding	KNOWN	JARID2	3	18	0.086492	Decile 8	Vigintile 15	Expr 91-92%
ENSG00000008086.10	ENST00000379989.6,ENST00000379996.7,ENST00000463994.4,ENST00000623364.3,ENST00000623535.1,ENST00000623610.1,ENST00000624700.3,ENST00000624953.1	7455.95	7235.87	976.97	5.03	4.23	976.97	0.16	5.04	4.46	4.00122	6.17903	0.0753552	3.54197	5.46718	0.0753454	chrX	18425583	18653629	18539606	+	protein_coding	KNOWN	CDKL5	8	22	0.053901	Decile 8	Vigintile 15	Expr 40-50%
ENSG00000008118.9	ENST00000009105.5,ENST00000361322.2,ENST00000423146.5,ENST00000494990.1	2440	2219.89	43	0.72	0.61	43	0	1.03	0.91	0.635413	1.49819	0.14685	0.553687	1.31679	0.146871	chr1	209583717	209613938	209598827	+	protein_coding	KNOWN	CAMK1G	4	13	0.155405	Decile 8	Vigintile 16	Expr 20-30%
ENSG00000008128.22	ENST00000356200.7,ENST00000356937.7,ENST00000357760.6,ENST00000358779.9,ENST00000378633.5,ENST00000378638.6,ENST00000401096.2,ENST00000404249.7,ENST00000460465.5,ENST00000463652.5,ENST00000464748.1,ENST00000468397.1,ENST00000468800.5,ENST00000474916.1,ENST00000478901.1,ENST00000479362.1,ENST00000487462.1,ENST00000489300.1,ENST00000491311.1,ENST00000492390.5,ENST00000495016.5,ENST00000498810.1,ENS…	1484.7	1264.61	1221.83	35.99	30.29	1224.75	19.15	36.54	32.31	32.8762	40.5198	0.0356386	29.1278	35.8817	0.0355874	chr1	1702730	1724324	1713527	-	protein_coding	KNOWN	CDK11A	23	20	1.61861	Decile 10	Vigintile 20	Expr 80-90%
ENSG00000008130.15	ENST00000341426.9,ENST00000341991.7,ENST00000342348.9,ENST00000378625.5,ENST00000460602.5,ENST00000464373.1,ENST00000469045.5,ENST00000477235.5,ENST00000480499.5,ENST00000480542.1,ENST00000489538.1,ENST00000492768.5,ENST00000492845.6,ENST00000497186.5,ENST00000497615.1,ENST00000497747.5,ENST00000498806.1	1882.27	1662.22	3245.13	72.73	61.21	3245.14	0.34	71.33	63.07	65.1026	77.7829	0.0301628	57.6791	68.8912	0.0301994	chr1	1751232	1780457	1765844	-	protein_coding	KNOWN	NADK	17	14	1.54592	Decile 10	Vigintile 20	Expr 90-91%
ENSG00000008196.12	ENST00000344788.7,ENST00000393655.3,ENST00000489228.1	1634.79	1414.68	5	0.13	0.11	5	0	0.25	0.22	0.0536663	0.486262	0.3222	0.0476758	0.430384	0.322059	chr6	50818723	50847613	50833168	+	protein_coding	KNOWN	TFAP2B	3	7	-0.273679	Decile 5	Vigintile 10	Expr 0-10%
ENSG00000008197.4	ENST00000008391.3,ENST00000492804.1	1711	1490.89	1	0.02	0.02	1	0	0.12	0.11	0.00761574	0.280469	0.42374	0.00693428	0.248226	0.423647	chr6	50713828	50772988	50743408	+	protein_coding	KNOWN	TFAP2D	2	8	-0.376655	Decile 5	Vigintile 9	Expr 0-10%
ENSG00000008226.19	ENST00000308059.10,ENST00000346219.7,ENST00000440294.6,ENST00000447130.1,ENST00000469151.1,ENST00000477260.1,ENST00000478428.1	4444.33	4224.22	36.65	0.32	0.27	36.87	2.82	4.12	3.65	0.357842	11.1859	0.551747	0.315109	9.89586	0.55174	chr3	38039205	38124025	38081615	+	protein_coding	KNOWN	DLEC1	7	37	0.372844	Decile 9	Vigintile 17	Expr 10-20%
ENSG00000008256.15	ENST00000350796.7,ENST00000396741.3,ENST00000461891.5,ENST00000465320.1,ENST00000466543.1,ENST00000478541.1,ENST00000481329.1,ENST00000482460.1,ENST00000488964.5,ENST00000491641.5,ENST00000495176.5	3485.6	3265.51	655	7.47	6.29	655	0	8.41	7.44	7.13303	9.78525	0.0549903	6.29673	8.64572	0.0549855	chr7	6161776	6272644	6217210	-	protein_coding	KNOWN	CYTH3	11	13	0.597726	Decile 9	Vigintile 18	Expr 40-50%
ENSG00000008277.14	ENST00000265727.11,ENST00000398201.8,ENST00000398203.7,ENST00000398204.8,ENST00000398209.7,ENST00000412441.5,ENST00000413139.1,ENST00000426930.5,ENST00000439864.5,ENST00000476330.1,ENST00000478920.1	5358.62	5138.51	804	5.83	4.91	804	0	6.18	5.46	5.23961	7.19823	0.0541515	4.60535	6.33651	0.0541527	chr7	87934143	88202889	88068516	+	protein_coding	KNOWN	ADAM22	11	31	-0.425131	Decile 4	Vigintile 8	Expr 40-50%
ENSG00000008282.8	ENST00000011473.6,ENST00000455385.6,ENST00000460770.1,ENST00000464029.5,ENST00000470347.1,ENST00000483448.1,ENST00000634737.1	1647.89	1427.77	1286	33.55	28.24	1286	0	32.23	28.5	29.5352	35.0223	0.0291604	26.1137	30.9623	0.0291061	chr7	106090503	106112576	106101539	-	protein_coding	KNOWN	SYPL1	7	6	-0.29188	Decile 5	Vigintile 10	Expr 70-80%
ENSG00000008283.15	ENST00000360793.7,ENST00000392975.6,ENST00000392976.5,ENST00000448884.6,ENST00000542042.5,ENST00000577368.5,ENST00000577989.5,ENST00000578016.1,ENST00000578072.1,ENST00000580592.1,ENST00000580691.5,ENST00000581163.5,ENST00000581573.5,ENST00000582034.5,ENST00000582143.1,ENST00000582297.5,ENST00000582997.5,ENST00000583478.1,ENST00000584031.5,ENST00000584291.5,ENST00000585153.1	2569.43	2349.33	935	14.83	12.48	935	0	16.48	14.57	14.6581	18.3587	0.0386823	12.9802	16.2565	0.0386356	chr17	63432304	63446378	63439341	-	protein_coding	KNOWN	CYB561	21	6	1.02117	Decile 10	Vigintile 19	Expr 60-70%
ENSG00000008294.20	ENST00000262013.11,ENST00000357122.8,ENST00000502329.1,ENST00000505173.5,ENST00000505279.5,ENST00000506483.1,ENST00000506500.1,ENST00000509724.1,ENST00000510283.5,ENST00000510855.1,ENST00000511312.2,ENST00000511795.1,ENST00000511987.5,ENST00000513547.5,ENST00000513746.6,ENST00000513827.5,ENST00000513906.1,ENST00000514205.1,ENST00000514613.5,ENST00000515685.1,ENST00000576492.1,ENST00000618113.4	4536.99	4316.88	2570	22.18	18.67	2570	0	24.29	21.48	21.631	27.0303	0.0379676	19.1153	23.8855	0.0380161	chr17	50962174	51120865	51041519	-	protein_coding	KNOWN	SPAG9	22	30	0.248732	Decile 8	Vigintile 16	Expr 70-80%
ENSG00000008300.14	ENST00000164024.4,ENST00000461362.5,ENST00000470999.1,ENST00000498057.1	7234.49	7014.38	2981	15.83	13.33	2981	0	15.42	13.63	14.4214	16.5227	0.0230692	12.7531	14.6114	0.0230945	chr3	48636469	48662915	48649692	-	protein_coding	KNOWN	CELSR3	4	35	1.78411	Decile 10	Vigintile 20	Expr 60-70%
ENSG00000008311.14	ENST00000358954.6,ENST00000393376.5,ENST00000417368.6,ENST00000426162.1,ENST00000431170.5,ENST00000460376.5,ENST00000473553.5	3036.77	2816.65	20210	267.3	224.98	20210	0.19	253.05	223.75	249.179	257.157	0.00544483	220.322	227.272	0.00535809	chr7	122075647	122144280	122109963	-	protein_coding	KNOWN	AASS	7	24	-0.13592	Decile 6	Vigintile 12	Expr 97-98%
ENSG00000008323.15	ENST00000011684.11,ENST00000304581.8,ENST00000396988.7,ENST00000449001.6,ENST00000535616.1,ENST00000536531.5,ENST00000538208.1,ENST00000543000.1,ENST00000544743.1	2277.52	2057.42	933	16.89	14.22	933	0	18.61	16.45	15.5728	21.9794	0.0576319	13.7711	19.4387	0.0575618	chr12	6310436	6328506	6319471	+	protein_coding	KNOWN	PLEKHG6	9	16	1.36519	Decile 10	Vigintile 20	Expr 60-70%
ENSG00000008324.10	ENST00000011691.4,ENST00000447630.5,ENST00000474941.1	811.05	590.94	952	60.02	50.51	952	0	56.96	50.37	53.304	60.605	0.0219556	47.1154	53.573	0.021998	chr3	42581840	42595114	42588477	+	protein_coding	KNOWN	SS18L2	3	4	0.386016	Decile 9	Vigintile 17	Expr 80-90%
ENSG00000008382.15	ENST00000262966.12,ENST00000359935.8,ENST00000594162.1,ENST00000594716.5,ENST00000596722.5,ENST00000597036.5,ENST00000599840.5,ENST00000601877.1	1145.02	924.98	671.96	27.06	22.78	671.95	0.21	26.21	23.18	22.7864	29.7326	0.0460018	20.1486	26.2955	0.045962	chr19	4343527	4360086	4351806	+	protein_coding	KNOWN	MPND	8	13	1.89745	Decile 10	Vigintile 20	Expr 70-80%
ENSG00000008394.12	ENST00000010404.6,ENST00000359720.3,ENST00000396207.1,ENST00000396209.5,ENST00000396210.7,ENST00000534835.5,ENST00000535309.5,ENST00000535624.1,ENST00000536371.5,ENST00000537878.5,ENST00000538857.1,ENST00000538885.5,ENST00000539036.5,ENST00000539708.5,ENST00000540056.5,ENST00000540126.5,ENST00000542256.5,ENST00000543076.5,ENST00000624056.1	750.6	531.11	4270	299.51	252.09	4270	0	291.89	258.09	261.906	322.63	0.0348494	232.285	286.006	0.0348875	chr12	16347142	16609259	16478200	+	protein_coding	KNOWN	MGST1	19	5	-0.425404	Decile 4	Vigintile 8	Expr 98-99%
ENSG00000008405.11	ENST00000008527.9,ENST00000546722.1,ENST00000549356.1,ENST00000550633.1,ENST00000552790.5	3187.9	2967.79	593	7.44	6.27	593	0	7.55	6.68	6.70212	8.44575	0.0390986	5.93933	7.48389	0.0390744	chr12	106991364	107093829	107042596	-	protein_coding	KNOWN	CRY1	5	13	-0.283372	Decile 5	Vigintile 10	Expr 40-50%
ENSG00000008438.4	ENST00000008938.4	720	499.91	4	0.3	0.25	4	0	0.35	0.31	0.0869072	0.664173	0.3018	0.0774279	0.587752	0.301703	chr19	46019153	46023065	46021109	-	protein_coding	KNOWN	PGLYRP1	1	3	1.73003	Decile 10	Vigintile 20	Expr 10-20%
ENSG00000008441.16	ENST00000358552.7,ENST00000360105.8,ENST00000397661.6,ENST00000585382.5,ENST00000585575.5,ENST00000586797.5,ENST00000586873.1,ENST00000587260.1,ENST00000587760.5,ENST00000588228.5,ENST00000588680.1,ENST00000590027.1,ENST00000591028.1,ENST00000592199.5	2653.59	2433.52	6	0.09	0.08	6	0	1	0.89	0.371025	1.84274	0.256456	0.326807	1.62888	0.256434	chr19	12995608	13098796	13047202	+	protein_coding	KNOWN	NFIX	14	11	1.56866	Decile 10	Vigintile 20	Expr 0-10%
ENSG00000008513.14	ENST00000399640.3,ENST00000517668.5,ENST00000518298.5,ENST00000519435.5,ENST00000519924.5,ENST00000520020.5,ENST00000521180.5,ENST00000521627.1,ENST00000522204.1,ENST00000522285.1,ENST00000522652.5,ENST00000522873.1,ENST00000523634.1,ENST00000523854.5,ENST00000523855.1	6389.66	6169.55	247	1.49	1.26	247	0	2.8	2.47	2.03921	3.63921	0.10013	1.80358	3.21938	0.100056	chr8	133454848	133571940	133513394	-	protein_coding	KNOWN	ST3GAL1	15	10	-0.012807	Decile 7	Vigintile 14	Expr 20-30%
ENSG00000008516.16	ENST00000336577.8,ENST00000570755.1,ENST00000575441.1,ENST00000612971.1	3209.09	2988.98	1385.64	17.27	14.54	1385.16	1.34	16.61	14.69	15.4196	17.8483	0.0250848	13.6413	15.7912	0.0250487	chr16	3046681	3060726	3053703	+	protein_coding	KNOWN	MMP25	4	10	1.83815	Decile 10	Vigintile 20	Expr 60-70%
ENSG00000008517.16	ENST00000008180.13,ENST00000325568.9,ENST00000382213.7,ENST00000396887.7,ENST00000396890.6,ENST00000440815.7,ENST00000444393.7,ENST00000525003.1,ENST00000525228.5,ENST00000525377.6,ENST00000525643.6,ENST00000526464.6,ENST00000528163.6,ENST00000528652.2,ENST00000529550.5,ENST00000529699.5,ENST00000530538.6,ENST00000530890.5,ENST00000531965.5,ENST00000532086.1,ENST00000532247.5,ENST00000533097.6,EN…	898.2	678.09	39	2.14	1.8	39	0	4.49	3.97	3.38834	5.62663	0.0861422	2.99634	4.97616	0.0861046	chr16	3065297	3082192	3073744	+	protein_coding	KNOWN	IL32	35	8	1.71313	Decile 10	Vigintile 20	Expr 20-30%
ENSG00000008710.17	ENST00000262304.8,ENST00000415938.7,ENST00000423118.5,ENST00000468674.5,ENST00000469241.2,ENST00000469851.1,ENST00000471603.6,ENST00000472577.1,ENST00000472659.1,ENST00000473780.2,ENST00000474088.1,ENST00000475889.1,ENST00000480227.5,ENST00000483024.1,ENST00000483558.5,ENST00000483731.5,ENST00000483814.1,ENST00000485120.1,ENST00000486339.6,ENST00000487932.5,ENST00000488185.2,ENST00000496574.6,ENS…	2910.32	2690.25	3053.97	42.29	35.59	3054.89	13.99	44.45	39.3	39.8761	48.969	0.0350228	35.3383	43.3787	0.0350225	chr16	2088710	2135898	2112304	-	protein_coding	KNOWN	PKD1	40	46	2.13004	Decile 10	Vigintile 20	Expr 80-90%
ENSG00000008735.13	ENST00000008876.7,ENST00000329492.5	3983.21	3763.1	193	1.91	1.61	193	0	1.83	1.61	1.55445	2.11625	0.0525942	1.37395	1.87104	0.0525569	chr22	50600685	50613981	50607333	+	protein_coding	KNOWN	MAPK8IP2	2	12	1.42846	Decile 10	Vigintile 20	Expr 20-30%
ENSG00000008838.17	ENST00000356271.7,ENST00000394126.5,ENST00000394127.6,ENST00000394128.6,ENST00000422942.6,ENST00000428757.6,ENST00000470126.1,ENST00000479829.5,ENST00000491466.5,ENST00000492176.2,ENST00000495586.1,ENST00000501516.7,ENST00000535071.6,ENST00000535508.6,ENST00000537674.6,ENST00000543759.6,ENST00000577488.5,ENST00000578161.2,ENST00000578901.1,ENST00000579364.1,ENST00000580008.5,ENST00000580302.1,ENS…	2447.65	2227.54	4067.01	68.02	57.25	4067.01	0.12	68.94	60.95	64.3088	73.8478	0.0241477	56.8336	65.2564	0.0241149	chr17	40019097	40061215	40040156	-	protein_coding	KNOWN	MED24	34	26	1.29295	Decile 10	Vigintile 20	Expr 80-90%
ENSG00000008853.16	ENST00000251822.6,ENST00000517528.1,ENST00000518534.1,ENST00000519210.1,ENST00000519685.5,ENST00000522948.5,ENST00000523918.1,ENST00000524077.5	5133.79	4913.67	660.24	5.01	4.21	659.85	3.09	6.33	5.6	5.09305	7.70536	0.0730881	4.52021	6.82982	0.0730575	chr8	22987417	23020199	23003808	+	protein_coding	KNOWN	RHOBTB2	8	12	0.624271	Decile 9	Vigintile 18	Expr 40-50%
ENSG00000008869.11	ENST00000233099.5,ENST00000425467.5,ENST00000467978.1,ENST00000471051.1,ENST00000478810.1	6807.62	6587.51	1054	5.96	5.02	1054	0	6.27	5.54	5.56819	7.0655	0.0407589	4.93248	6.25623	0.0407129	chr2	36968383	37084342	37026362	-	protein_coding	KNOWN	HEATR5B	5	36	-0.16271	Decile 6	Vigintile 12	Expr 40-50%
ENSG00000008952.16	ENST00000337002.8,ENST00000460513.5,ENST00000461933.1,ENST00000469515.6,ENST00000469890.1,ENST00000470355.1,ENST00000480708.5,ENST00000481435.5,ENST00000487736.5,ENST00000497277.1	1790.42	1570.32	1596	37.86	31.87	1596	0	37.88	33.49	33.8938	42.1798	0.0374537	30.015	37.3408	0.0374291	chr3	169966635	169998373	169982504	+	protein_coding	KNOWN	SEC62	10	9	-0.259124	Decile 6	Vigintile 11	Expr 80-90%
ENSG00000008988.9	ENST00000009589.7,ENST00000518875.5,ENST00000519369.1,ENST00000519606.5,ENST00000519807.5,ENST00000520490.1,ENST00000520627.1,ENST00000521262.5,ENST00000521289.5,ENST00000523936.5,ENST00000524349.5,ENST00000618656.1	627.99	407.92	28193	2574.74	2167.04	28193	0.04	2437.58	2155.31	2408.6	2466.99	0.00412949	2131.19	2181.28	0.00404543	chr8	56067295	56074581	56070938	-	protein_coding	KNOWN	RPS20	12	6	0.15373	Decile 8	Vigintile 16	Expr 99-100%
ENSG00000009307.15	ENST00000261443.9,ENST00000339438.10,ENST00000358528.8,ENST00000369530.5,ENST00000438362.6,ENST00000483030.1,ENST00000483407.1,ENST00000524652.1,ENST00000525132.1,ENST00000525878.5,ENST00000525970.5,ENST00000529046.5,ENST00000530784.1,ENST00000530886.5,ENST00000533818.5,ENST00000534389.2,ENST00000534699.5,ENST00000610726.4	3175.05	2954.95	21975.2	277.05	233.18	21975.2	0.5	264.04	233.47	252.085	276.271	0.0151518	223.155	244.522	0.0150865	chr1	114716913	114758676	114737794	-	protein_coding	KNOWN	CSDE1	18	21	0.101278	Decile 8	Vigintile 15	Expr 97-98%
ENSG00000009335.17	ENST00000348165.9,ENST00000389103.4,ENST00000430750.1,ENST00000469336.1,ENST00000470408.5,ENST00000474153.1,ENST00000494532.1,ENST00000497368.1,ENST00000611269.4	4735.29	4515.19	2654	21.9	18.43	2654	0	21.61	19.1	20.203	23.1406	0.0231477	17.8758	20.4688	0.0231199	chr7	157138913	157269372	157204142	+	protein_coding	KNOWN	UBE3C	9	23	0.320109	Decile 9	Vigintile 17	Expr 70-80%
ENSG00000009413.15	ENST00000358835.7,ENST00000368802.7,ENST00000368805.5,ENST00000413831.1,ENST00000422377.5,ENST00000434009.5,ENST00000435970.5,ENST00000460981.1,ENST00000462119.5,ENST00000467500.1,ENST00000470871.1,ENST00000492520.1,ENST00000494858.1,ENST00000619481.1	7319.01	7098.9	307.46	1.61	1.36	307.49	0.65	3.24	2.86	1.9306	4.7859	0.150985	1.71091	4.23668	0.150943	chr6	111299028	111483715	111391371	-	protein_coding	KNOWN	REV3L	14	34	-0.352985	Decile 5	Vigintile 9	Expr 20-30%
ENSG00000009694.13	ENST00000371130.7,ENST00000422452.2,ENST00000461429.1	12875	12654.9	159	0.47	0.39	159	0	0.63	0.56	0.390633	0.999835	0.166403	0.3466	0.885425	0.166276	chrX	124375903	124963817	124669860	-	protein_coding	KNOWN	TENM1	3	32	-0.505469	Decile 3	Vigintile 6	Expr 10-20%
ENSG00000009709.11	ENST00000375375.7,ENST00000400661.3,ENST00000420770.6	5392.16	5172.05	9	0.06	0.05	9	0	0.13	0.11	0.049492	0.22106	0.236618	0.0440248	0.195751	0.236528	chr1	18631006	18748866	18689936	+	protein_coding	KNOWN	PAX7	3	9	0.977764	Decile 10	Vigintile 19	Expr 0-10%
ENSG00000009724.16	ENST00000400897.7,ENST00000400898.3,ENST00000478645.1,ENST00000480221.1	2312.76	2092.64	113	2.01	1.69	113	0	2.17	1.92	1.69304	2.68287	0.0767001	1.49754	2.37285	0.0765924	chr1	11026523	11047233	11036878	-	protein_coding	KNOWN	MASP2	4	11	1.07013	Decile 10	Vigintile 20	Expr 20-30%
ENSG00000009765.14	ENST00000229447.9,ENST00000344419.7,ENST00000367335.7,ENST00000392255.7,ENST00000392256.6,ENST00000422583.2,ENST00000425615.3,ENST00000500320.7,ENST00000546121.1	2567.11	2347.03	0	0	0	0	0	0.54	0.48	0.144571	1.03071	0.297277	0.126846	0.910282	0.297261	chr6	150368892	150405969	150387430	+	protein_coding	KNOWN	IYD	9	6	-0.222314	Decile 6	Vigintile 11	Non-expressed
ENSG00000009780.15	ENST00000010299.10,ENST00000234549.11,ENST00000373949.5,ENST00000373954.10,ENST00000419687.6,ENST00000446647.1,ENST00000530324.5	1656.06	1435.95	272	7.06	5.94	272	0	7	6.19	5.78982	8.26955	0.0607288	5.12182	7.31496	0.0606852	chr1	27725979	27763122	27744550	+	protein_coding	KNOWN	FAM76A	7	10	0.676285	Decile 10	Vigintile 19	Expr 40-50%
ENSG00000009790.14	ENST00000367023.5,ENST00000367024.5,ENST00000367025.7,ENST00000367026.7,ENST00000400959.7,ENST00000460314.1,ENST00000467830.1,ENST00000468672.5,ENST00000471368.1,ENST00000474496.5,ENST00000476050.5,ENST00000477431.1,ENST00000478359.5,ENST00000479796.5,ENST00000487271.5,ENST00000488702.1	3302	3081.89	5.02	0.06	0.05	5.96	1.05	1.03	0.91	0.506505	1.63998	0.193893	0.439116	1.44202	0.193762	chr1	209756032	209782320	209769176	+	protein_coding	KNOWN	TRAF3IP3	16	17	0.049749	Decile 8	Vigintile 15	Expr 0-10%
ENSG00000009830.11	ENST00000261534.8,ENST00000452340.7,ENST00000553863.5,ENST00000553880.5,ENST00000554564.1,ENST00000554767.5,ENST00000554884.5,ENST00000554948.1,ENST00000555134.1,ENST00000555675.5,ENST00000555710.1,ENST00000555788.5,ENST00000556171.1,ENST00000556326.5,ENST00000556394.1,ENST00000556404.1,ENST00000556446.1,ENST00000556851.1,ENST00000556880.5,ENST00000557289.1,ENST00000557525.1,ENST00000557675.5,ENS…	3338.72	3118.61	1440	17.2	14.48	1440	0	21.02	18.59	18.0982	24.2647	0.0504086	15.9297	21.3843	0.0504361	chr14	77274956	77320884	77297920	-	protein_coding	KNOWN	POMT2	23	21	0.454378	Decile 9	Vigintile 18	Expr 60-70%
ENSG00000009844.15	ENST00000367621.1,ENST00000367630.8,ENST00000452973.6,ENST00000491881.1,ENST00000620996.4	1759.6	1539.49	1361	32.93	27.72	1361	0	31.38	27.74	29.4743	33.3604	0.0213646	26.0706	29.509	0.0213738	chr6	142147162	142224689	142185925	+	protein_coding	KNOWN	VTA1	5	8	-0.690594	Decile 2	Vigintile 3	Expr 70-80%
ENSG00000009950.15	ENST00000313375.7,ENST00000345114.9,ENST00000354613.5,ENST00000414749.6,ENST00000429400.6,ENST00000434326.5,ENST00000453275.1,ENST00000456640.1,ENST00000467221.1,ENST00000476404.5,ENST00000488212.1	1788.66	1568.58	638	15.15	12.75	638	0	14.69	12.99	12.7697	16.6892	0.0460127	11.346	14.8106	0.0460736	chr7	73593194	73624543	73608868	-	protein_coding	KNOWN	MLXIPL	11	17	1.06301	Decile 10	Vigintile 20	Expr 60-70%
ENSG00000009954.10	ENST00000339594.8,ENST00000404251.1,ENST00000466844.1	5795.3	5575.19	6341	42.37	35.66	6341	0	40.17	35.52	39.1183	41.2198	0.00899419	34.6109	36.4632	0.00891844	chr7	73440398	73522278	73481338	-	protein_coding	KNOWN	BAZ1B	3	20	0.719045	Decile 10	Vigintile 19	Expr 80-90%
ENSG00000010017.12	ENST00000011619.5,ENST00000469916.1	2775	2554.89	1212	17.67	14.87	1212.01	0.08	16.92	14.96	15.2429	18.729	0.034909	13.4774	16.5625	0.034864	chr6	13621498	13711564	13666531	-	protein_coding	KNOWN	RANBP9	2	14	-0.14941	Decile 6	Vigintile 12	Expr 60-70%
ENSG00000010030.13	ENST00000339796.9,ENST00000340181.8,ENST00000373737.8,ENST00000373738.4,ENST00000538992.3,ENST00000615781.4,ENST00000620358.4,ENST00000627426.2	1507.99	1287.88	55	1.59	1.34	55	0	1.71	1.51	1.29351	2.14487	0.0862334	1.14299	1.89654	0.0861933	chr6	36354091	36387800	36370945	-	protein_coding	KNOWN	ETV7	8	8	0.667742	Decile 9	Vigintile 18	Expr 20-30%
ENSG00000010072.15	ENST00000008440.9,ENST00000295050.11,ENST00000366644.3,ENST00000391858.8,ENST00000469904.1,ENST00000492437.1	1988.08	1767.99	242.91	5.12	4.31	243.11	1.92	5.13	4.54	3.69826	6.51933	0.095571	3.28376	5.77827	0.0956158	chr1	231337104	231355023	231346063	+	protein_coding	KNOWN	SPRTN	6	6	-0.095558	Decile 7	Vigintile 13	Expr 40-50%
ENSG00000010165.19	ENST00000361735.3,ENST00000362019.7,ENST00000367737.9,ENST00000466643.1,ENST00000476386.1,ENST00000478330.1,ENST00000485629.1	2638.53	2418.42	3160	48.68	40.97	3160	0	47.15	41.69	43.8208	50.477	0.024504	38.791	44.6651	0.0245155	chr1	171781664	171814023	171797843	+	protein_coding	KNOWN	METTL13	7	8	-0.054439	Decile 7	Vigintile 13	Expr 80-90%
ENSG00000010219.13	ENST00000010132.6,ENST00000536137.1,ENST00000536157.5,ENST00000536645.1,ENST00000537719.5,ENST00000538520.5,ENST00000539309.5,ENST00000539490.1,ENST00000539701.5,ENST00000540644.1,ENST00000540757.6,ENST00000541024.1,ENST00000542905.1,ENST00000543431.5,ENST00000544050.1,ENST00000544671.1,ENST00000545571.5	750.1	530.05	91	6.4	5.38	91	0	7.87	6.96	5.95638	9.82441	0.0854472	5.27739	8.69769	0.0854169	chr12	4562204	4615302	4588753	+	protein_coding	KNOWN	DYRK4	17	15	0.16343	Decile 8	Vigintile 16	Expr 40-50%
ENSG00000010244.16	ENST00000321233.10,ENST00000342555.10,ENST00000394670.8,ENST00000394673.6,ENST00000394679.9,ENST00000577324.1,ENST00000577908.5,ENST00000578918.1,ENST00000579416.1,ENST00000579634.5,ENST00000579810.2,ENST00000580759.5,ENST00000581531.5,ENST00000582165.1,ENST00000582705.1,ENST00000584416.1,ENST00000584696.1	2266.54	2046.43	9118	165.99	139.7	9117.02	1.11	160.27	141.71	155.449	164.991	0.0101426	137.639	145.999	0.0100813	chr17	32350117	32381886	32366001	+	protein_coding	KNOWN	ZNF207	17	14	0.806551	Decile 10	Vigintile 19	Expr 95-96%
ENSG00000010256.10	ENST00000203407.5,ENST00000412343.5,ENST00000415995.5,ENST00000460105.1,ENST00000463708.1,ENST00000467690.5,ENST00000471189.5,ENST00000472438.5,ENST00000480561.5,ENST00000493806.1	1239.86	1019.78	8380	306.13	257.66	8380	0	291.46	257.71	272.984	310.344	0.020839	241.341	274.367	0.0208288	chr3	48599002	48610976	48604989	-	protein_coding	KNOWN	UQCRC1	10	13	1.91958	Decile 10	Vigintile 20	Expr 98-99%
ENSG00000010270.13	ENST00000009041.11,ENST00000396013.5,ENST00000429075.1,ENST00000434197.5,ENST00000440144.5,ENST00000453225.5,ENST00000471550.1	1527.62	1307.51	697	19.86	16.71	697	0	19.29	17.06	17.5856	20.9011	0.0294642	15.5836	18.5151	0.0294687	chr7	38178222	38230671	38204446	+	protein_coding	KNOWN	STARD3NL	7	10	-0.375355	Decile 5	Vigintile 9	Expr 60-70%
ENSG00000010278.11	ENST00000009180.8,ENST00000382515.6,ENST00000382518.5,ENST00000382519.8,ENST00000481267.5,ENST00000536586.5,ENST00000538418.1,ENST00000538834.5,ENST00000540891.1,ENST00000543916.5,ENST00000546073.5,ENST00000610354.4,ENST00000617871.4	1076.81	856.7	4082	177.51	149.4	4082	0	168.44	148.94	162.127	174.611	0.0127438	143.509	154.509	0.0127062	chr12	6199715	6238271	6218993	+	protein_coding	KNOWN	CD9	13	9	1.10594	Decile 10	Vigintile 20	Expr 96-97%
ENSG00000010282.14	ENST00000310417.9,ENST00000416756.5,ENST00000417472.5,ENST00000426666.5,ENST00000441594.5,ENST00000442469.1,ENST00000455195.5,ENST00000457462.5,ENST00000466007.1,ENST00000480939.1,ENST00000490003.5,ENST00000497000.1	999.68	779.6	10	0.48	0.4	10	0	1.5	1.33	0.815734	2.24059	0.167883	0.722429	1.98307	0.167888	chr3	42692663	42702827	42697745	-	protein_coding	KNOWN	HHATL	12	13	0.495764	Decile 9	Vigintile 18	Expr 10-20%
ENSG00000010292.12	ENST00000315579.9,ENST00000382457.8,ENST00000535804.1,ENST00000536090.1,ENST00000536538.1,ENST00000538600.1,ENST00000539084.5,ENST00000539714.5,ENST00000539885.1,ENST00000541399.1,ENST00000542472.1,ENST00000542492.1,ENST00000545732.1	4434.97	4214.87	8841.27	78.15	65.77	8840.66	6.42	76.21	67.38	72.0041	80.5888	0.0191971	63.6699	71.2492	0.0192046	chr12	6493356	6531955	6512655	+	protein_coding	KNOWN	NCAPD2	13	32	1.34169	Decile 10	Vigintile 20	Expr 90-91%
ENSG00000010295.19	ENST00000336604.8,ENST00000356896.8,ENST00000396830.2,ENST00000396840.6,ENST00000436152.6,ENST00000465801.5,ENST00000471408.5,ENST00000472558.6,ENST00000487279.6,ENST00000488007.5,ENST00000615885.4,ENST00000619571.4	2479.93	2259.82	599	9.87	8.31	599	0	9.36	8.28	8.55599	10.2449	0.0307965	7.54477	9.03617	0.0307909	chr12	6538375	6556083	6547229	-	protein_coding	KNOWN	IFFO1	12	12	2.00893	Decile 10	Vigintile 20	Expr 50-60%
ENSG00000010310.8	ENST00000263281.7,ENST00000304207.12,ENST00000585889.1,ENST00000588816.1,ENST00000590918.5,ENST00000591224.1,ENST00000591322.1,ENST00000593127.1	2215.62	1995.52	32	0.6	0.5	32	0	25.79	22.8	0.611517	74.9747	0.627017	0.554055	66.3111	0.627132	chr19	45668244	45683724	45675984	+	protein_coding	KNOWN	GIPR	8	14	1.64954	Decile 10	Vigintile 20	Expr 10-20%
ENSG00000010318.19	ENST00000327906.7,ENST00000347025.6,ENST00000459935.1,ENST00000461861.5,ENST00000465863.1,ENST00000472337.5,ENST00000473145.5,ENST00000482327.5,ENST00000498509.2,ENST00000614886.4,ENST00000615126.1,ENST00000620464.4	1251.54	1031.44	231	8.34	7.02	231	0	8.82	7.8	7.34805	10.4207	0.0596326	6.51219	9.23014	0.0596744	chr3	52410561	52423641	52417101	+	protein_coding	KNOWN	PHF7	12	12	1.29323	Decile 10	Vigintile 20	Expr 40-50%
ENSG00000010319.6	ENST00000231721.6,ENST00000465657.1,ENST00000475739.1	3464.3	3244.21	115	1.32	1.11	115	0	1.47	1.3	0.991431	1.99246	0.118672	0.874233	1.75979	0.118597	chr3	52433053	52445085	52439069	-	protein_coding	KNOWN	SEMA3G	3	16	1.25001	Decile 10	Vigintile 20	Expr 20-30%
ENSG00000010322.15	ENST00000345716.8,ENST00000420808.2,ENST00000460759.1,ENST00000464280.5,ENST00000467594.1,ENST00000474188.1,ENST00000479054.5,ENST00000481211.1,ENST00000485765.5,ENST00000488157.5,ENST00000488243.1,ENST00000488380.5,ENST00000489895.5,ENST00000490425.1	3848.59	3628.48	4636	47.6	40.06	4636	0	46.24	40.88	44.0012	48.5561	0.0170528	38.9423	42.9664	0.0170645	chr3	52455118	52493071	52474094	+	protein_coding	KNOWN	NISCH	14	22	1.37461	Decile 10	Vigintile 20	Expr 80-90%
ENSG00000010327.10	ENST00000321725.10,ENST00000461325.1,ENST00000462681.1,ENST00000462741.5,ENST00000469989.1,ENST00000479355.1,ENST00000481607.1,ENST00000481626.5,ENST00000484850.1	1985.37	1765.27	45.01	0.95	0.8	45.01	0.09	1.36	1.2	0.79677	1.9719	0.152131	0.704804	1.74445	0.151925	chr3	52495338	52524495	52509916	+	protein_coding	KNOWN	STAB1	9	69	1.61671	Decile 10	Vigintile 20	Expr 20-30%
ENSG00000010361.13	ENST00000313777.8,ENST00000377092.8,ENST00000525130.5,ENST00000525370.5,ENST00000525800.5,ENST00000526435.1,ENST00000526575.1,ENST00000527111.2,ENST00000527585.5,ENST00000527973.1,ENST00000528043.5,ENST00000528094.5,ENST00000529302.1,ENST00000529634.2,ENST00000531017.5,ENST00000533418.5,ENST00000534008.5,ENST00000534138.1	1222.25	1002.15	797.15	29.63	24.94	797.37	2.84	30.08	26.59	27.2504	32.9993	0.032768	24.0682	29.1594	0.0327868	chr19	49806869	49817376	49812122	-	protein_coding	KNOWN	FUZ	18	11	1.98231	Decile 10	Vigintile 20	Expr 70-80%
ENSG00000010379.15	ENST00000343164.8,ENST00000436453.1,ENST00000445055.6,ENST00000534887.1,ENST00000536842.5,ENST00000539260.1,ENST00000539668.1,ENST00000542272.5,ENST00000542379.1,ENST00000542947.1,ENST00000543722.1,ENST00000546319.5	851.58	631.55	0	0	0	0	0	1.27	1.12	0.513614	2.16976	0.231509	0.45437	1.92016	0.23139	chr12	220621	262873	241747	-	protein_coding	KNOWN	SLC6A13	12	15	0.553919	Decile 9	Vigintile 18	Non-expressed
ENSG00000010404.17	ENST00000340855.10,ENST00000370441.8,ENST00000428056.6,ENST00000464251.5,ENST00000466019.1,ENST00000466323.5,ENST00000490775.5,ENST00000521702.1	3575.59	3355.48	1139.21	12.65	10.65	1141.32	15.87	12.48	11.04	11.1537	13.8819	0.0380908	9.85755	12.2718	0.0380853	chrX	149476990	149521096	149499043	-	protein_coding	KNOWN	IDS	8	9	-0.024261	Decile 7	Vigintile 14	Expr 50-60%
ENSG00000010438.16	ENST00000342836.8,ENST00000361005.9,ENST00000379405.3,ENST00000429677.7,ENST00000457896.5,ENST00000468152.2,ENST00000477653.2,ENST00000495682.1	786	565.9	2	0.13	0.11	2	0	8.73	7.72	0.287118	24.5985	0.593599	0.254072	21.7556	0.593441	chr9	33750466	33799231	33774848	+	protein_coding	KNOWN	PRSS3	8	6	0.2662	Decile 8	Vigintile 16	Expr 0-10%
ENSG00000010539.11	ENST00000396868.7,ENST00000396870.8,ENST00000396871.8,ENST00000414144.6,ENST00000431561.7,ENST00000575285.1,ENST00000575617.1,ENST00000575630.1,ENST00000575948.1,ENST00000577015.1	2885.48	2665.37	350	4.89	4.12	349.76	0.43	5.18	4.58	4.43164	5.97957	0.0515659	3.90822	5.27714	0.0515943	chr16	3222325	3236221	3229273	-	protein_coding	KNOWN	ZNF200	10	5	1.04205	Decile 10	Vigintile 20	Expr 40-50%
ENSG00000010610.9	ENST00000011653.8,ENST00000437800.6,ENST00000535466.5,ENST00000535707.5,ENST00000536563.1,ENST00000536590.1,ENST00000536610.5,ENST00000538827.5,ENST00000539492.1,ENST00000541982.5,ENST00000543755.1,ENST00000544344.5	2227.81	2007.72	280	5.2	4.37	280	0	5.73	5.07	4.70856	6.76821	0.0616578	4.16099	5.98498	0.0616349	chr12	6786858	6820808	6803833	+	protein_coding	KNOWN	CD4	12	10	1.35043	Decile 10	Vigintile 20	Expr 40-50%
ENSG00000010626.14	ENST00000007969.12,ENST00000323702.9,ENST00000415834.5,ENST00000428946.5,ENST00000429740.1,ENST00000431207.5,ENST00000433346.5,ENST00000436789.5,ENST00000443597.6,ENST00000449039.5,ENST00000451681.5,ENST00000457146.5,ENST00000472633.1,ENST00000486401.1,ENST00000622489.4	1021.64	801.56	49.99	2.32	1.96	50.67	1.37	3.14	2.78	2.19157	4.19899	0.111718	1.93741	3.71446	0.111658	chr12	6873569	6914243	6893906	+	protein_coding	KNOWN	LRRC23	15	8	1.592	Decile 10	Vigintile 20	Expr 30-40%
ENSG00000010671.15	ENST00000308731.7,ENST00000372880.5,ENST00000464006.1,ENST00000464567.1,ENST00000470069.1,ENST00000470329.1,ENST00000478995.1,ENST00000488970.1,ENST00000618050.4,ENST00000621635.4	2417	2196.89	1	0.02	0.01	1	0	1.15	1.01	0.311121	2.16623	0.293433	0.295976	1.93692	0.29344	chrX	101349447	101390796	101370121	-	protein_coding	KNOWN	BTK	10	19	0.108997	Decile 8	Vigintile 15	Expr 0-10%
ENSG00000010704.18	ENST00000309234.10,ENST00000317896.11,ENST00000336625.12,ENST00000349999.8,ENST00000352392.8,ENST00000353147.9,ENST00000357618.9,ENST00000397022.7,ENST00000461397.5,ENST00000470149.5,ENST00000483782.1,ENST00000485729.1,ENST00000486147.1,ENST00000488199.5	1862.47	1642.35	63	1.43	1.2	63	0	2.34	2.07	1.64164	3.09219	0.108457	1.45102	2.73474	0.10846	chr6	26087281	26098343	26092812	+	protein_coding	KNOWN	HFE	14	7	0.403201	Decile 9	Vigintile 17	Expr 20-30%
ENSG00000010803.16	ENST00000326197.11,ENST00000337495.9,ENST00000361191.9,ENST00000361705.7,ENST00000372595.5,ENST00000372596.5,ENST00000372597.5,ENST00000397171.6,ENST00000397174.6,ENST00000402904.6,ENST00000456518.3,ENST00000460215.5,ENST00000472037.5,ENST00000482530.1,ENST00000488592.1,ENST00000489421.1,ENST00000498793.5	2622.6	2402.5	960	14.89	12.53	960	0	15.53	13.73	13.6324	17.5646	0.0438526	12.0422	15.5204	0.0438671	chr1	41027200	41242154	41134677	-	protein_coding	KNOWN	SCMH1	17	16	0.244078	Decile 8	Vigintile 16	Expr 60-70%
ENSG00000010810.17	ENST00000229471.8,ENST00000354650.7,ENST00000368667.6,ENST00000368678.8,ENST00000368682.7,ENST00000462598.7,ENST00000462856.6,ENST00000467899.5,ENST00000467921.6,ENST00000471959.2,ENST00000476769.6,ENST00000484067.6,ENST00000487824.2,ENST00000491885.6,ENST00000495927.5,ENST00000495935.1,ENST00000496864.6,ENST00000517419.5,ENST00000518295.5,ENST00000518630.5,ENST00000520518.5,ENST00000521062.5,ENS…	1440.44	1220.35	2302	70.27	59.15	2302	0	69.23	61.21	62.0039	76.8264	0.037151	54.8094	67.9195	0.0371067	chr6	111660332	111873452	111766892	-	protein_coding	KNOWN	FYN	29	14	-0.195986	Decile 6	Vigintile 11	Expr 80-90%
ENSG00000010818.8	ENST00000012134.6,ENST00000367603.6,ENST00000367604.5,ENST00000474532.1	9613.29	9393.18	729	2.89	2.43	728.26	0.96	3.66	3.24	2.56598	5.5353	0.142954	2.26729	4.89644	0.143022	chr6	142751467	142945201	142848334	-	protein_coding	KNOWN	HIVEP2	4	10	-0.581258	Decile 3	Vigintile 5	Expr 30-40%
ENSG00000010932.15	ENST00000354841.4,ENST00000367750.7,ENST00000402921.6,ENST00000433267.5,ENST00000459868.1,ENST00000469112.5,ENST00000469711.1,ENST00000472893.1,ENST00000617670.4	647	426.93	1	0.09	0.07	1	0	0.6	0.53	0.160343	1.13	0.289156	0.140509	0.998895	0.289119	chr1	171248471	171285978	171267224	+	protein_coding	KNOWN	FMO1	9	9	-0.015556	Decile 7	Vigintile 14	Expr 0-10%
ENSG00000011007.12	ENST00000418390.6,ENST00000487554.1,ENST00000609199.1,ENST00000613537.4	3657.18	3437.06	2381.22	25.81	21.72	2380.37	11.92	24.54	21.7	23.3041	25.795	0.0173441	20.6187	22.8197	0.0173215	chr1	23743155	23762059	23752607	+	protein_coding	KNOWN	TCEB3	4	11	0.958949	Decile 10	Vigintile 19	Expr 70-80%
ENSG00000011009.10	ENST00000374501.1,ENST00000374502.7,ENST00000374503.7,ENST00000374505.6,ENST00000374514.7,ENST00000420982.5,ENST00000421070.1,ENST00000472213.1,ENST00000492577.1,ENST00000495365.5	1672.12	1452.01	4878	125.15	105.34	4878	0	119.89	106.01	115.882	124.154	0.0117807	102.462	109.769	0.0117799	chr1	23790970	23795539	23793254	+	protein_coding	KNOWN	LYPLA2	10	10	1.15928	Decile 10	Vigintile 20	Expr 94-95%
ENSG00000011021.21	ENST00000312413.10,ENST00000346436.10,ENST00000376490.7,ENST00000376491.7,ENST00000376492.3,ENST00000376496.4,ENST00000376497.7,ENST00000494028.1	4751.61	4531.5	1748	14.37	12.09	1748	0	14.02	12.4	13.0123	15.081	0.0254577	11.5183	13.347	0.0254555	chr1	11806096	11843144	11824620	+	protein_coding	KNOWN	CLCN6	8	23	1.17355	Decile 10	Vigintile 20	Expr 60-70%
ENSG00000011028.13	ENST00000303375.9,ENST00000446119.2,ENST00000579432.1,ENST00000580916.1,ENST00000583597.5,ENST00000584265.1,ENST00000584682.1	4321.08	4100.96	1512.77	13.74	11.57	1512.77	0.46	18.31	16.19	12.0834	28.7115	0.157377	10.7163	25.4173	0.157326	chr17	62627401	62693597	62660499	+	protein_coding	KNOWN	MRC2	7	30	0.768642	Decile 10	Vigintile 19	Expr 60-70%
ENSG00000011052.21	ENST00000376392.10,ENST00000393193.6,ENST00000555572.1	1021	800.89	206.39	9.6	8.08	214.03	32.83	9.55	8.44	6.61595	12.7176	0.11256	5.85263	11.2483	0.112551	chr17	51153590	51171744	51162667	+	protein_coding	KNOWN	NME1-NME2	3	9	0.722504	Decile 10	Vigintile 19	Expr 50-60%
ENSG00000011083.8	ENST00000230671.6,ENST00000513403.1,ENST00000524041.1	3739	3518.89	9	0.1	0.08	9	0	0.21	0.19	0.0618753	0.417315	0.289668	0.0535244	0.368122	0.289558	chr5	150189957	150222788	150206372	+	protein_coding	KNOWN	SLC6A7	3	16	0.863223	Decile 10	Vigintile 19	Expr 0-10%
ENSG00000011105.11	ENST00000011898.9,ENST00000407263.1,ENST00000431374.6,ENST00000444315.6,ENST00000492305.1,ENST00000537971.5,ENST00000539631.1	4090.86	3870.75	1230	11.84	9.96	1230	0	11.91	10.53	10.9143	12.9233	0.0286545	9.65874	11.4346	0.0286401	chr12	3077355	3286564	3181959	+	protein_coding	KNOWN	TSPAN9	7	9	0.771191	Decile 10	Vigintile 19	Expr 50-60%
ENSG00000011114.14	ENST00000298896.7,ENST00000334746.9,ENST00000355125.3,ENST00000553975.1,ENST00000554565.5,ENST00000554644.1,ENST00000554968.1,ENST00000555525.1	5390.26	5170.16	1301	9.37	7.89	1301	0	9.53	8.43	8.11925	11.1533	0.0528104	7.17925	9.86526	0.0527879	chr14	93237550	93333092	93285321	-	protein_coding	KNOWN	BTBD7	8	11	0.046828	Decile 8	Vigintile 15	Expr 50-60%
ENSG00000011132.11	ENST00000316757.3,ENST00000586991.1,ENST00000588984.5,ENST00000589934.1,ENST00000590064.1,ENST00000590238.1,ENST00000591678.1,ENST00000592826.1	1708.09	1487.99	659	16.5	13.89	659	0	16.24	14.36	14.3122	18.194	0.0414999	12.6603	16.092	0.0415182	chr19	3750819	3761699	3756259	-	protein_coding	KNOWN	APBA3	8	11	1.62749	Decile 10	Vigintile 20	Expr 60-70%
ENSG00000011143.16	ENST00000313863.10,ENST00000393119.6,ENST00000393120.6,ENST00000537529.6,ENST00000577315.5,ENST00000577824.5,ENST00000578789.1,ENST00000579358.1,ENST00000580127.5,ENST00000581180.1,ENST00000581761.5,ENST00000583577.1,ENST00000585134.1	1746.97	1526.86	495	12.08	10.17	495	0	12.66	11.2	11.0625	14.3831	0.0452855	9.79168	12.7272	0.0451913	chr17	58205437	58219605	58212521	-	protein_coding	KNOWN	MKS1	13	18	0.62131	Decile 9	Vigintile 18	Expr 50-60%
ENSG00000011198.7	ENST00000013894.2,ENST00000413300.1,ENST00000454293.1,ENST00000456453.5,ENST00000458276.6,ENST00000463153.1,ENST00000486764.1	1616.66	1396.54	437	11.66	9.81	437	0	11.76	10.4	10.5237	13.0144	0.0363161	9.32096	11.5244	0.0362853	chr3	43690113	43734371	43712242	+	protein_coding	KNOWN	ABHD5	7	7	0.009311	Decile 7	Vigintile 14	Expr 50-60%
ENSG00000011201.10	ENST00000262648.7,ENST00000481896.1,ENST00000488294.1,ENST00000619786.1	3236.57	3016.46	2741.45	33.86	28.5	2741.47	0.72	32.25	28.51	30.2599	34.2467	0.0213411	26.7638	30.2882	0.021416	chrX	8528874	8732187	8630530	-	protein_coding	KNOWN	ANOS1	4	17	-0.17158	Decile 6	Vigintile 12	Expr 70-80%
ENSG00000011243.17	ENST00000397410.9,ENST00000593845.5,ENST00000594594.6,ENST00000594893.5,ENST00000595067.1,ENST00000595087.5,ENST00000595136.5,ENST00000595465.6,ENST00000595879.5,ENST00000596195.5,ENST00000596213.5,ENST00000596750.2,ENST00000597994.5,ENST00000598292.1,ENST00000599137.5,ENST00000599488.5,ENST00000600065.5,ENST00000600247.5,ENST00000601147.2,ENST00000609519.5	1714.07	1493.97	3436.53	85.69	72.12	3438.21	8.86	83.83	74.12	79.4449	88.3414	0.0184631	70.1578	78.0243	0.0184254	chr19	15380048	15419141	15399594	-	protein_coding	KNOWN	AKAP8L	20	16	1.50842	Decile 10	Vigintile 20	Expr 91-92%
ENSG00000011258.15	ENST00000376381.3,ENST00000405860.7,ENST00000415868.5,ENST00000586178.5,ENST00000586898.1,ENST00000591270.1,ENST00000593259.1	4777.31	4557.2	2394	19.57	16.47	2394	0	18.85	16.67	17.535	20.2419	0.0241002	15.5181	17.914	0.0240709	chr17	51177425	51260163	51218794	-	protein_coding	KNOWN	MBTD1	7	17	0.21899	Decile 8	Vigintile 16	Expr 60-70%
ENSG00000011260.13	ENST00000225298.11,ENST00000508506.3,ENST00000579261.6,ENST00000582150.1,ENST00000582832.1,ENST00000583205.5,ENST00000583725.5	1842.72	1622.6	1922	44.13	37.14	1922	0	42.78	37.82	40.5027	45.0263	0.0181543	35.8377	39.8354	0.0181121	chr17	51260528	51297936	51279232	+	protein_coding	KNOWN	UTP18	7	14	0.110663	Decile 8	Vigintile 15	Expr 80-90%
ENSG00000011275.18	ENST00000389900.8,ENST00000389902.7,ENST00000411812.1,ENST00000416985.5,ENST00000425013.6,ENST00000469375.1,ENST00000476345.1,ENST00000479541.1,ENST00000484458.2	4946.88	4726.76	1541	12.15	10.22	1541	0	12.31	10.89	11.4002	13.2678	0.0256885	10.0706	11.7241	0.0255881	chr7	5620047	5781739	5700893	-	protein_coding	KNOWN	RNF216	9	17	0.765899	Decile 10	Vigintile 19	Expr 50-60%
ENSG00000011295.15	ENST00000261647.9,ENST00000465567.1,ENST00000466729.5,ENST00000470399.1,ENST00000470649.1,ENST00000475723.5,ENST00000481107.1,ENST00000497842.6,ENST00000578103.1,ENST00000583704.1	2815.42	2595.31	2006.48	28.8	24.24	2006.7	1.35	28.07	24.82	26.61	29.5319	0.0179693	23.5424	26.1228	0.0178865	chr17	15999380	16045015	16022197	+	protein_coding	KNOWN	TTC19	10	10	0.461664	Decile 9	Vigintile 18	Expr 70-80%
ENSG00000011304.17	ENST00000349038.8,ENST00000350092.8,ENST00000356948.10,ENST00000394601.8,ENST00000585535.2,ENST00000585856.2,ENST00000585932.5,ENST00000585956.5,ENST00000586481.5,ENST00000586944.5,ENST00000587094.2,ENST00000587136.1,ENST00000587191.3,ENST00000589575.5,ENST00000589883.1,ENST00000590887.5,ENST00000592113.5,ENST00000592804.1,ENST00000621737.4,ENST00000627714.2,ENST00000635647.1	1793.36	1573.3	20526	486.03	409.07	20526	0	464.87	411.04	442.709	488.347	0.017299	391.562	431.8	0.0172636	chr19	797075	812327	804701	+	protein_coding	KNOWN	PTBP1	21	15	1.98504	Decile 10	Vigintile 20	Expr 98-99%
ENSG00000011332.19	ENST00000355526.8,ENST00000412732.5,ENST00000414789.5,ENST00000416611.5,ENST00000418517.5,ENST00000420980.6,ENST00000438060.5,ENST00000438365.5,ENST00000456296.5,ENST00000471976.5,ENST00000472656.5,ENST00000473716.5,ENST00000475938.1,ENST00000488378.1,ENST00000494031.5,ENST00000586624.1,ENST00000614244.4	1593.92	1373.83	274	7.43	6.25	274	0	8.38	7.41	6.87714	10.0372	0.0654991	6.08316	8.87622	0.0654268	chr19	38211006	38229714	38220360	-	protein_coding	KNOWN	DPF1	17	12	1.62959	Decile 10	Vigintile 20	Expr 40-50%
ENSG00000011347.9	ENST00000263846.8,ENST00000535826.5,ENST00000539008.5,ENST00000539246.5,ENST00000539468.5,ENST00000540677.5,ENST00000540831.1,ENST00000542670.5,ENST00000542836.5,ENST00000545053.1	4069.44	3849.33	897	8.68	7.31	897	0	8.81	7.79	7.91687	9.7436	0.0352119	6.99759	8.61524	0.0351599	chr11	61515313	61581148	61548230	-	protein_coding	KNOWN	SYT7	10	14	1.30572	Decile 10	Vigintile 20	Expr 50-60%
ENSG00000011376.9	ENST00000265537.7,ENST00000414984.5,ENST00000415258.5,ENST00000430399.1,ENST00000431023.5,ENST00000467936.5,ENST00000474585.1,ENST00000485461.1	3990.52	3770.41	2881	28.47	23.96	2881	0	27.87	24.64	25.7697	30.0166	0.0265307	22.794	26.5479	0.0264959	chr3	45388506	45549421	45468963	+	protein_coding	KNOWN	LARS2	8	22	0.32258	Decile 9	Vigintile 17	Expr 70-80%
ENSG00000011405.13	ENST00000265970.11,ENST00000503729.2,ENST00000531428.1,ENST00000532035.1,ENST00000533645.1	5873.17	5653.07	3165	20.86	17.55	3165	0	22.67	20.04	18.4035	28.7851	0.0727145	16.2935	25.474	0.0726969	chr11	17077730	17207983	17142856	-	protein_coding	KNOWN	PIK3C2A	5	32	0.126886	Decile 8	Vigintile 15	Expr 60-70%
ENSG00000011422.11	ENST00000221264.8,ENST00000339082.7,ENST00000340093.7,ENST00000593396.1,ENST00000593447.5,ENST00000593714.5,ENST00000593939.5,ENST00000594364.1,ENST00000595038.5,ENST00000597107.1,ENST00000598875.1,ENST00000599546.1,ENST00000599892.5,ENST00000601723.5,ENST00000601876.1,ENST00000602141.5	1165.14	945.03	494	19.47	16.39	494	0	19.81	17.51	17.814	21.8552	0.034926	15.8062	19.3833	0.0349031	chr19	43646095	43670547	43658321	-	protein_coding	KNOWN	PLAUR	16	7	1.07831	Decile 10	Vigintile 20	Expr 60-70%
ENSG00000011426.10	ENST00000265748.6,ENST00000396068.6,ENST00000418118.1,ENST00000424865.1,ENST00000428612.5,ENST00000429082.1,ENST00000441696.5,ENST00000446635.5,ENST00000452877.5,ENST00000457743.1,ENST00000460598.1,ENST00000491782.1,ENST00000495714.1	3218.61	2998.52	2355	29.26	24.63	2355	0	31.3	27.68	26.9404	35.8855	0.0500156	23.8133	31.7277	0.0499386	chr7	36389806	36453791	36421798	+	protein_coding	KNOWN	ANLN	13	24	-0.409563	Decile 4	Vigintile 8	Expr 70-80%
ENSG00000011451.17	ENST00000263381.11,ENST00000389282.8,ENST00000545156.5,ENST00000595214.2,ENST00000596159.1,ENST00000599686.3,ENST00000599910.6,ENST00000600632.1	4034.9	3814.78	1971	19.25	16.2	1971	0	18.91	16.72	17.7131	20.1146	0.0212669	15.6727	17.7957	0.0212393	chr19	15419980	15449951	15434965	-	protein_coding	KNOWN	WIZ	8	9	1.36814	Decile 10	Vigintile 20	Expr 60-70%
ENSG00000011454.16	ENST00000317419.7,ENST00000373647.8,ENST00000402311.5,ENST00000426918.2,ENST00000456584.5,ENST00000459903.5,ENST00000468760.1,ENST00000474707.1,ENST00000475607.1,ENST00000480054.1,ENST00000485090.1,ENST00000493854.5,ENST00000616002.1	4398.55	4178.45	1576	14.05	11.83	1576.73	0.78	14.88	13.16	13.2485	16.6662	0.0402222	11.6804	14.7059	0.0401735	chr9	122940833	123104866	123022849	+	protein_coding	KNOWN	RABGAP1	13	28	0.101479	Decile 8	Vigintile 15	Expr 60-70%
ENSG00000011465.16	ENST00000052754.9,ENST00000393155.5,ENST00000420120.6,ENST00000425043.5,ENST00000441303.6,ENST00000456569.2,ENST00000546370.5,ENST00000546391.5,ENST00000546745.5,ENST00000547568.6,ENST00000547937.5,ENST00000548218.1,ENST00000548768.1,ENST00000549513.5,ENST00000550099.5,ENST00000550563.5,ENST00000550758.1,ENST00000551354.1,ENST00000552145.5,ENST00000552962.5	1438	1217.89	1	0.03	0.03	1	0	3.91	3.46	0.807705	9.24825	0.406617	0.683828	8.15209	0.40674	chr12	91140484	91183123	91161803	-	protein_coding	KNOWN	DCN	20	9	-0.657174	Decile 2	Vigintile 3	Expr 0-10%
ENSG00000011478.11	ENST00000012049.9,ENST00000366382.8,ENST00000591606.1,ENST00000592769.1	2058.1	1838	917	18.59	15.64	917	0	18.08	15.98	16.3508	19.8005	0.032441	14.4665	17.5197	0.0323845	chr19	45692483	45703989	45698236	+	protein_coding	KNOWN	QPCTL	4	7	1.4205	Decile 10	Vigintile 20	Expr 60-70%
ENSG00000011485.14	ENST00000012443.8,ENST00000391919.1,ENST00000467502.6,ENST00000467902.2,ENST00000478046.5,ENST00000486994.5,ENST00000487483.6,ENST00000491003.5,ENST00000492109.6,ENST00000493347.5,ENST00000525507.5,ENST00000527193.1,ENST00000527623.1,ENST00000532058.1,ENST00000595055.1	1939.77	1719.67	3562	77.17	64.95	3561.45	0.85	74.73	66.08	71.0971	78.5712	0.0171469	62.8103	69.4101	0.0171172	chr19	46346994	46392981	46369987	+	protein_coding	KNOWN	PPP5C	15	14	1.31237	Decile 10	Vigintile 20	Expr 90-91%
ENSG00000011523.13	ENST00000260569.4,ENST00000377990.6,ENST00000475851.1,ENST00000497039.1,ENST00000537589.1	4498.35	4278.25	1597	13.91	11.7	1597	0	13.28	11.75	11.3434	15.3247	0.0538045	10.006	13.528	0.0538042	chr2	65056366	65087004	65071685	+	protein_coding	KNOWN	CEP68	5	7	0.302977	Decile 9	Vigintile 17	Expr 60-70%
ENSG00000011566.14	ENST00000263881.7,ENST00000341681.9,ENST00000414968.1,ENST00000429397.5,ENST00000437545.5,ENST00000437968.1,ENST00000465701.1,ENST00000474502.5,ENST00000475457.1,ENST00000479708.1,ENST00000484274.1,ENST00000495648.3,ENST00000497566.5	4014.62	3794.51	1090	10.7	9.01	1090	0	18.4	16.27	10.7967	31.6981	0.206125	9.55737	28.045	0.206084	chr2	39249266	39437312	39343289	-	protein_coding	KNOWN	MAP4K3	13	34	-0.274044	Decile 5	Vigintile 10	Expr 50-60%
ENSG00000011590.13	ENST00000262630.7,ENST00000392197.6,ENST00000426659.6,ENST00000442282.1,ENST00000451726.1,ENST00000481182.1	1259.66	1039.56	8	0.29	0.24	8	0	0.81	0.72	0.286659	1.47714	0.259778	0.253147	1.30657	0.25976	chr19	35704527	35717038	35710782	+	protein_coding	KNOWN	ZBTB32	6	7	1.36114	Decile 10	Vigintile 20	Expr 10-20%
ENSG00000011600.11	ENST00000262629.8,ENST00000424586.7,ENST00000544690.6,ENST00000585626.1,ENST00000585901.6,ENST00000586946.1,ENST00000587837.5,ENST00000588439.1,ENST00000589517.1	533.33	313.31	0	0	0	0	0	1.06	0.94	0.422666	1.79554	0.228047	0.372587	1.58735	0.228289	chr19	35904401	35908295	35906348	-	protein_coding	KNOWN	TYROBP	9	5	1.40122	Decile 10	Vigintile 20	Non-expressed
ENSG00000011638.10	ENST00000233047.8,ENST00000261388.7,ENST00000451578.6,ENST00000572258.5,ENST00000572599.5,ENST00000573487.5,ENST00000573688.1,ENST00000574092.1,ENST00000577162.1	1112.64	892.55	733	30.59	25.75	733	0	29.94	26.47	26.6497	33.2451	0.0379762	23.6068	29.4347	0.037928	chr16	21158377	21180616	21169496	+	protein_coding	KNOWN	TMEM159	9	7	0.582731	Decile 9	Vigintile 18	Expr 70-80%
ENSG00000011677.12	ENST00000370314.8,ENST00000417858.1,ENST00000497894.1,ENST00000535043.1	3344.15	3124.03	282	3.36	2.83	282	0	3.8	3.36	2.92716	4.72708	0.0797521	2.59962	4.19126	0.0797538	chrX	152166234	152451358	152308796	-	protein_coding	KNOWN	GABRA3	4	10	-0.186175	Decile 6	Vigintile 12	Expr 30-40%
ENSG00000012048.20	ENST00000352993.7,ENST00000354071.7,ENST00000357654.7,ENST00000412061.3,ENST00000461221.5,ENST00000461574.1,ENST00000461798.5,ENST00000468300.5,ENST00000470026.5,ENST00000471181.6,ENST00000472490.1,ENST00000473961.5,ENST00000476777.5,ENST00000477152.5,ENST00000478531.5,ENST00000484087.5,ENST00000487825.5,ENST00000489037.1,ENST00000491747.6,ENST00000492859.5,ENST00000493795.5,ENST00000493919.5,ENS…	2540.33	2320.23	1467	23.55	19.82	1467	0	24.83	21.96	22.1449	27.687	0.0379754	19.5987	24.4998	0.0380075	chr17	43044295	43170245	43107270	-	protein_coding	KNOWN	BRCA1	30	24	0.859941	Decile 10	Vigintile 19	Expr 70-80%
ENSG00000012061.15	ENST00000013807.9,ENST00000300853.7,ENST00000340192.11,ENST00000423698.6,ENST00000587888.5,ENST00000588300.1,ENST00000588738.5,ENST00000589165.5,ENST00000589214.1,ENST00000589381.5,ENST00000590701.5,ENST00000591636.5,ENST00000592023.5,ENST00000592083.5,ENST00000592410.5,ENST00000592444.5,ENST00000592905.5	1427.84	1207.73	1170.5	36.11	30.39	1170.74	18.97	36.22	32.03	32.9853	39.3305	0.0301078	29.1853	34.803	0.0301107	chr19	45407333	45478828	45443080	-	protein_coding	KNOWN	ERCC1	17	10	1.55557	Decile 10	Vigintile 20	Expr 80-90%
ENSG00000012124.14	ENST00000085219.9,ENST00000270311.10,ENST00000341773.10,ENST00000419549.6,ENST00000536635.6,ENST00000544992.6,ENST00000593704.1,ENST00000593867.5,ENST00000594125.1,ENST00000594250.5,ENST00000594349.1,ENST00000594954.5,ENST00000595419.5,ENST00000595780.5,ENST00000596492.5,ENST00000597433.1,ENST00000597916.5,ENST00000598028.5,ENST00000598138.5,ENST00000598537.5,ENST00000598815.5,ENST00000599717.5,E…	1776.46	1556.35	4	0.1	0.08	4	0	2.63	2.32	1.72462	3.59206	0.12468	1.51543	3.16713	0.124499	chr19	35319261	35347355	35333308	+	protein_coding	KNOWN	CD22	35	14	1.37244	Decile 10	Vigintile 20	Expr 0-10%
ENSG00000012171.17	ENST00000416295.1,ENST00000418576.3,ENST00000419007.5,ENST00000433753.4,ENST00000434030.1,ENST00000439487.5,ENST00000441915.5,ENST00000456210.5,ENST00000456560.6,ENST00000611067.4,ENST00000611418.4,ENST00000612509.4,ENST00000616701.4,ENST00000618865.4,ENST00000619119.4,ENST00000621029.4	2017	1796.89	176	3.65	3.07	176	0	3.86	3.42	3.10984	4.65241	0.0694783	2.74788	4.11252	0.0695484	chr3	50267558	50277546	50272552	+	protein_coding	KNOWN	SEMA3B	16	18	1.63721	Decile 10	Vigintile 20	Expr 30-40%
ENSG00000012174.11	ENST00000365779.2,ENST00000379484.9,ENST00000465888.1	4176.93	3956.81	327.02	3.08	2.59	327.46	4.19	2.97	2.63	2.5555	3.4035	0.0499876	2.26317	3.01373	0.0500616	chrX	21839636	21885424	21862530	+	protein_coding	KNOWN	MBTPS2	3	11	-0.430575	Decile 4	Vigintile 8	Expr 30-40%
ENSG00000012211.12	ENST00000376310.7,ENST00000376317.4,ENST00000432913.5,ENST00000453382.5,ENST00000540849.5,ENST00000599218.5,ENST00000611313.1,ENST00000614014.1	1667.16	1447.06	335.18	8.63	7.26	335.19	0.39	8.76	7.75	7.46453	10.1252	0.0523844	6.59141	8.94482	0.0524359	chrX	49175264	49186528	49180896	-	protein_coding	KNOWN	PRICKLE3	8	9	1.39018	Decile 10	Vigintile 20	Expr 50-60%
ENSG00000012223.12	ENST00000231751.8,ENST00000417439.5,ENST00000426532.6,ENST00000431944.1,ENST00000443496.5,ENST00000462667.1,ENST00000478874.2,ENST00000493056.5,ENST00000498301.1	2489.8	2269.68	24	0.39	0.33	24	0	1.13	1	0.558966	1.75559	0.188318	0.496329	1.55484	0.188298	chr3	46435645	46485234	46460439	-	protein_coding	KNOWN	LTF	9	20	0.703212	Decile 10	Vigintile 19	Expr 10-20%
ENSG00000012232.8	ENST00000220562.8,ENST00000454906.6,ENST00000517738.1,ENST00000518223.1,ENST00000519288.5,ENST00000519886.5,ENST00000520679.1,ENST00000520940.1,ENST00000521473.5,ENST00000521532.5,ENST00000522698.1,ENST00000522725.5,ENST00000523149.5,ENST00000523271.1	5084.36	4864.27	5925	45.38	38.19	5925.68	0.74	44.8	39.61	40.1368	49.4108	0.035201	35.5475	43.7405	0.035199	chr8	28600469	28755599	28678034	+	protein_coding	KNOWN	EXTL3	14	7	0.216327	Decile 8	Vigintile 16	Expr 80-90%
ENSG00000012504.13	ENST00000188403.7,ENST00000321046.9,ENST00000392986.7,ENST00000546380.1,ENST00000548621.1,ENST00000548884.5,ENST00000549996.5,ENST00000551184.1,ENST00000551379.5	1394.22	1174.17	0	0	0	0	0	0.84	0.74	0.161535	1.8724	0.371444	0.142468	1.65655	0.371418	chr12	100473708	100564413	100519060	+	protein_coding	KNOWN	NR1H4	9	11	-0.350126	Decile 5	Vigintile 9	Non-expressed
ENSG00000012660.13	ENST00000304434.10,ENST00000370913.5,ENST00000370918.8,ENST00000465983.5,ENST00000485336.5,ENST00000486973.1,ENST00000542638.5	2546.57	2326.46	5375	86.07	72.44	5375	0	81.85	72.37	79.0439	84.589	0.011727	69.9177	74.8056	0.0116683	chr6	53267398	53349179	53308288	-	protein_coding	KNOWN	ELOVL5	7	9	0.022039	Decile 7	Vigintile 14	Expr 91-92%
ENSG00000012779.10	ENST00000374391.6,ENST00000475300.1,ENST00000481117.1,ENST00000483623.2,ENST00000493336.1,ENST00000498461.1,ENST00000542434.5,ENST00000612635.4	1742.24	1522.17	78	1.91	1.61	78	0	2.58	2.28	1.71531	3.5366	0.122635	1.52102	3.13225	0.122582	chr10	45374176	45446119	45410147	+	protein_coding	KNOWN	ALOX5	8	14	0.08568	Decile 8	Vigintile 15	Expr 20-30%
ENSG00000012817.15	ENST00000317961.8,ENST00000382806.6,ENST00000415360.1,ENST00000440077.5,ENST00000447300.1,ENST00000469599.6,ENST00000478891.1,ENST00000485154.1,ENST00000492117.1,ENST00000541639.5	4382.3	4162.19	1728	15.47	13.02	1728	0	15.06	13.32	13.5711	16.6239	0.0351293	11.977	14.6775	0.0350721	chrY	19703865	19744939	19724402	-	protein_coding	KNOWN	KDM5D	10	1	-0.389167	Decile 4	Vigintile 8	Expr 60-70%
ENSG00000012822.15	ENST00000262059.8,ENST00000430117.6,ENST00000546443.5,ENST00000546619.5,ENST00000546774.1,ENST00000547885.5,ENST00000547949.6,ENST00000547988.5,ENST00000548177.5,ENST00000548263.5,ENST00000548431.1,ENST00000549173.5,ENST00000549349.5,ENST00000549613.1,ENST00000549688.1,ENST00000549784.5,ENST00000549935.6,ENST00000550804.5,ENST00000551900.5,ENST00000552282.1,ENST00000552623.5,ENST00000553154.5	2077.53	1857.44	795	15.94	13.42	795	0	16.98	15.01	14.6586	19.431	0.0484348	12.9682	17.1934	0.048466	chr12	53708517	53727745	53718131	-	protein_coding	KNOWN	CALCOCO1	22	15	0.860945	Decile 10	Vigintile 19	Expr 60-70%
ENSG00000012963.13	ENST00000013070.10,ENST00000416753.5,ENST00000553674.1,ENST00000553857.5,ENST00000554232.5,ENST00000555113.5,ENST00000555329.1,ENST00000556871.5	3277.22	3057.11	1619	19.73	16.61	1616.17	2.83	19.85	17.55	18.0979	21.8093	0.0323718	15.9938	19.2778	0.032343	chr14	93207056	93229215	93218135	+	protein_coding	KNOWN	UBR7	8	11	0.122795	Decile 8	Vigintile 15	Expr 60-70%
ENSG00000012983.11	ENST00000013125.8,ENST00000554066.1,ENST00000554091.5,ENST00000554273.1,ENST00000554990.5,ENST00000555216.5,ENST00000557124.1,ENST00000557210.5,ENST00000557390.5,ENST00000557578.1	3595.27	3375.17	886	9.78	8.23	886	0	10.81	9.56	9.26342	12.5346	0.0519788	8.15501	11.0493	0.0519363	chr14	50418501	50561126	50489813	-	protein_coding	KNOWN	MAP4K5	10	32	-0.106707	Decile 7	Vigintile 13	Expr 50-60%
ENSG00000013016.14	ENST00000322054.9,ENST00000541626.2	4495.05	4274.93	820	7.15	6.01	820	0	6.9	6.1	6.27042	7.53916	0.032143	5.56212	6.68344	0.0320887	chr2	31234337	31269447	31251892	+	protein_coding	KNOWN	EHD3	2	7	0.038183	Decile 7	Vigintile 14	Expr 40-50%
ENSG00000013275.7	ENST00000157812.6,ENST00000455878.2,ENST00000593455.5,ENST00000596386.1,ENST00000601194.1,ENST00000601697.5	1555.79	1335.67	4363.99	121.72	102.44	4363.99	0.09	115.82	102.41	112.168	119.547	0.0110977	99.225	105.737	0.0110219	chr19	39971005	39981441	39976223	+	protein_coding	KNOWN	PSMC4	6	11	1.07805	Decile 10	Vigintile 20	Expr 94-95%
ENSG00000013288.8	ENST00000285599.7,ENST00000504248.5,ENST00000504960.1,ENST00000505907.1,ENST00000510427.1	5549.71	5329.6	360	2.52	2.12	360	0	18.7	16.54	2.23204	51.5044	0.555701	1.97255	45.5713	0.555797	chr4	6575175	6623362	6599268	+	protein_coding	KNOWN	MAN2B2	5	19	0.730226	Decile 10	Vigintile 19	Expr 30-40%
ENSG00000013293.5	ENST00000231706.5,ENST00000466168.1	10103	9882.89	54	0.2	0.17	54	0	0.34	0.3	0.153401	0.626146	0.248953	0.135811	0.554091	0.248845	chr3	170459584	170586074	170522829	-	protein_coding	KNOWN	SLC7A14	2	8	-0.216176	Decile 6	Vigintile 11	Expr 10-20%
ENSG00000013297.10	ENST00000064724.7,ENST00000468358.5,ENST00000471373.5,ENST00000477531.3,ENST00000480067.1,ENST00000486429.1,ENST00000486975.1,ENST00000488989.1,ENST00000489485.5	2111.23	1891.11	168	3.31	2.79	168	0	3.72	3.29	3.08416	4.38712	0.0597598	2.72708	3.87916	0.0598032	chr3	170418865	170860380	170639622	+	protein_coding	KNOWN	CLDN11	9	6	-0.21945	Decile 6	Vigintile 11	Expr 30-40%
ENSG00000013306.15	ENST00000225308.12,ENST00000377095.9,ENST00000537904.6,ENST00000585523.1,ENST00000585636.5,ENST00000585695.5,ENST00000586016.5,ENST00000586633.5,ENST00000588049.5,ENST00000588315.5,ENST00000588767.5,ENST00000590194.5,ENST00000591006.5,ENST00000591151.1,ENST00000592372.5,ENST00000592857.5,ENST00000593166.1	1537.75	1317.63	5793	163.79	137.85	5793	0	157.47	139.24	152.555	162.426	0.0110038	134.92	143.622	0.0109458	chr17	44319625	44324870	44322247	-	protein_coding	KNOWN	SLC25A39	17	12	1.72525	Decile 10	Vigintile 20	Expr 95-96%
ENSG00000013364.18	ENST00000357402.9,ENST00000395353.5,ENST00000562463.5,ENST00000563096.1,ENST00000563123.1,ENST00000563558.5,ENST00000563915.5,ENST00000565164.1,ENST00000565830.5,ENST00000566066.5,ENST00000566252.1,ENST00000566554.1,ENST00000566859.5,ENST00000568068.1,ENST00000569612.1,ENST00000569887.1,ENST00000570061.1,ENST00000570234.5,ENST00000629059.1	2354.24	2134.13	112	1.96	1.65	112	0	8.75	7.74	2.93407	18.5447	0.335354	2.60074	16.4088	0.335316	chr16	29820394	29848039	29834216	+	protein_coding	KNOWN	MVP	19	15	1.5258	Decile 10	Vigintile 20	Expr 20-30%
ENSG00000013374.15	ENST00000413040.6,ENST00000460712.1,ENST00000468404.5,ENST00000470229.5,ENST00000470316.5,ENST00000477666.1,ENST00000480714.1,ENST00000480907.5,ENST00000483358.5,ENST00000493588.5,ENST00000497987.1,ENST00000568733.5	2297.76	2077.66	1278.93	22.93	19.3	1278.93	0.25	23.34	20.63	21.3098	25.4699	0.0308382	18.8215	22.5016	0.0308307	chr7	151341699	151378449	151360074	+	protein_coding	KNOWN	NUB1	12	15	0.582248	Decile 9	Vigintile 18	Expr 70-80%
ENSG00000013375.15	ENST00000283977.8,ENST00000503094.1,ENST00000504780.5,ENST00000505470.5,ENST00000506587.5,ENST00000507404.1,ENST00000507554.1,ENST00000508748.5,ENST00000509219.1,ENST00000510258.1,ENST00000512866.5,ENST00000513973.5,ENST00000515333.1,ENST00000605602.1,ENST00000616566.4	2048.84	1828.75	1689.07	34.41	28.96	1689.08	6.04	71.88	63.56	31.8183	143.224	0.291906	27.8521	126.373	0.2918	chr6	83161150	83193936	83177543	-	protein_coding	KNOWN	PGM3	15	14	-0.344753	Decile 5	Vigintile 9	Expr 70-80%
ENSG00000013392.7	ENST00000369724.4	3744	3523.89	216	2.28	1.92	216	0	2.17	1.92	1.89131	2.478	0.0459187	1.66974	2.18834	0.0460024	chr6	83193379	83198932	83196155	+	protein_coding	KNOWN	RWDD2A	1	3	0.10604	Decile 8	Vigintile 15	Expr 30-40%
ENSG00000013441.15	ENST00000321356.8,ENST00000409403.6,ENST00000409769.6,ENST00000432425.5,ENST00000434813.3,ENST00000461326.1,ENST00000461981.5,ENST00000464454.1,ENST00000472679.1,ENST00000473565.5,ENST00000481641.1,ENST00000482590.1,ENST00000492793.1,ENST00000496205.1,ENST00000621181.4	1697.9	1477.79	520	13.11	11.03	520	0	13.71	12.12	12.145	15.3021	0.0392055	10.7642	13.5541	0.0392566	chr2	200853009	200864744	200858876	-	protein_coding	KNOWN	CLK1	15	13	0.169194	Decile 8	Vigintile 16	Expr 50-60%
ENSG00000013503.9	ENST00000228347.8,ENST00000539066.5,ENST00000549195.1,ENST00000549569.1	4272.87	4052.76	535	4.92	4.14	535	0	4.95	4.38	4.42653	5.48992	0.0362182	3.92432	4.86528	0.0361929	chr12	106357658	106510198	106433928	+	protein_coding	KNOWN	POLR3B	4	28	-0.130103	Decile 6	Vigintile 12	Expr 40-50%
ENSG00000013523.9	ENST00000251089.6,ENST00000554941.1,ENST00000555079.1,ENST00000556298.1,ENST00000557179.5,ENST00000557497.1	4191.6	3971.49	1459.5	13.69	11.52	1459.56	2.81	13.53	11.96	12.1596	14.9713	0.035766	10.7877	13.2747	0.0356671	chr14	76786178	76826246	76806212	-	protein_coding	KNOWN	ANGEL1	6	10	0.332804	Decile 9	Vigintile 17	Expr 50-60%
ENSG00000013561.17	ENST00000347642.7,ENST00000356143.5,ENST00000394514.6,ENST00000394519.5,ENST00000394520.6,ENST00000502341.5,ENST00000506004.5,ENST00000506822.5,ENST00000506938.5,ENST00000507163.5,ENST00000507291.1,ENST00000511961.5,ENST00000512565.5,ENST00000513019.5,ENST00000514620.5,ENST00000515613.5	1735.46	1515.36	311	7.65	6.44	311	0	8.8	7.78	7.27645	10.4385	0.0618173	6.44602	9.24126	0.0618123	chr5	141958328	141990291	141974309	+	protein_coding	KNOWN	RNF14	16	9	0.512716	Decile 9	Vigintile 18	Expr 40-50%
ENSG00000013563.13	ENST00000014935.7,ENST00000309585.9,ENST00000369807.5,ENST00000369808.7,ENST00000369809.5,ENST00000393638.5,ENST00000412184.1,ENST00000424626.5,ENST00000432135.1,ENST00000447892.1,ENST00000451865.5,ENST00000497242.1	1878.93	1658.82	499.31	11.21	9.44	499.18	3.1	12.75	11.28	9.83175	16.6744	0.0849925	8.68591	14.7385	0.0850679	chrX	154401238	154412112	154406675	-	protein_coding	KNOWN	DNASE1L1	12	10	1.77001	Decile 10	Vigintile 20	Expr 50-60%
ENSG00000013573.16	ENST00000228264.10,ENST00000350437.8,ENST00000415475.6,ENST00000435753.6,ENST00000438391.6,ENST00000535158.5,ENST00000535317.5,ENST00000536265.5,ENST00000536580.5,ENST00000537136.1,ENST00000538345.1,ENST00000538740.1,ENST00000539049.5,ENST00000539673.5,ENST00000539699.5,ENST00000539702.1,ENST00000540935.5,ENST00000542129.5,ENST00000542242.1,ENST00000542244.5,ENST00000542661.1,ENST00000542777.1,EN…	2235.24	2015.14	4814.23	89	74.91	4814.15	9.51	88.11	77.91	81.6542	94.7741	0.0257557	72.216	83.8223	0.0257603	chr12	31073845	31104791	31089318	+	protein_coding	KNOWN	DDX11	30	27	0.456761	Decile 9	Vigintile 18	Expr 92-93%
ENSG00000013583.8	ENST00000014930.8,ENST00000535636.1,ENST00000536942.1,ENST00000540916.1	1177.84	957.72	1165	45.32	38.14	1165	0	43.16	38.17	40.6478	45.6085	0.0197984	35.9961	40.384	0.0197674	chr12	12974864	13000273	12987568	-	protein_coding	KNOWN	HEBP1	4	4	0.273321	Decile 8	Vigintile 16	Expr 80-90%
ENSG00000013588.5	ENST00000014914.5,ENST00000534831.1,ENST00000537783.1,ENST00000540125.1,ENST00000542056.1	5328.64	5108.53	42	0.31	0.26	42	0	0.57	0.51	0.280309	0.925957	0.200817	0.247293	0.818399	0.200862	chr12	12890782	12917937	12904359	+	protein_coding	KNOWN	GPRC5A	5	4	0.184912	Decile 8	Vigintile 16	Expr 10-20%
ENSG00000013619.13	ENST00000262858.7,ENST00000358892.7,ENST00000370401.6,ENST00000426613.4,ENST00000432680.6,ENST00000464149.1,ENST00000468306.1	3035.71	2815.6	8	0.11	0.09	8	0	0.31	0.27	0.108462	0.561957	0.262926	0.0936702	0.494687	0.262931	chrX	150361422	150514178	150437800	+	protein_coding	KNOWN	MAMLD1	7	8	0.165183	Decile 8	Vigintile 16	Expr 0-10%
ENSG00000013725.14	ENST00000313421.11,ENST00000344931.9,ENST00000352009.9,ENST00000419282.2,ENST00000433107.6,ENST00000452451.6,ENST00000505761.2,ENST00000538288.1,ENST00000538611.1,ENST00000541964.1,ENST00000542157.5,ENST00000542254.5,ENST00000545105.5,ENST00000545320.1	1268	1047.89	1	0.04	0.03	1	0	1.11	0.98	0.459108	1.82704	0.21974	0.418322	1.62868	0.219715	chr11	60971680	61020377	60996028	+	protein_coding	KNOWN	CD6	14	13	0.885609	Decile 10	Vigintile 19	Expr 0-10%
ENSG00000013810.18	ENST00000313288.8,ENST00000404054.3,ENST00000458173.3,ENST00000466077.1,ENST00000467746.5,ENST00000470136.1,ENST00000470808.1,ENST00000484264.1,ENST00000484651.5,ENST00000485989.6,ENST00000493975.5,ENST00000612220.4,ENST00000617535.4	2233.17	2013.06	6058	112.11	94.36	6058	0	107.4	94.96	103.468	111.324	0.0124872	91.5625	98.4936	0.0125237	chr4	1721490	1745176	1733333	+	protein_coding	KNOWN	TACC3	13	16	1.55495	Decile 10	Vigintile 20	Expr 93-94%
ENSG00000014123.9	ENST00000369278.4,ENST00000461673.1	4224	4003.89	404	3.76	3.16	404	0	3.71	3.28	3.28088	4.17647	0.0393944	2.90209	3.69426	0.0393939	chr6	96521595	96555276	96538435	+	protein_coding	KNOWN	UFL1	2	19	-0.713313	Decile 1	Vigintile 2	Expr 30-40%
ENSG00000014138.8	ENST00000265465.7,ENST00000525924.1,ENST00000527618.5,ENST00000527850.5,ENST00000532391.1,ENST00000532469.1,ENST00000533192.1,ENST00000534785.1	2696.59	2476.49	1475	22.19	18.68	1475	0	22.17	19.61	19.5349	24.9082	0.0421783	17.2796	22.0393	0.0421864	chr11	65261762	65305589	65283675	+	protein_coding	KNOWN	POLA2	8	18	1.46187	Decile 10	Vigintile 20	Expr 70-80%
ENSG00000014164.6	ENST00000262577.5,ENST00000528401.1	3280	3059.89	897	10.92	9.19	897	0	10.45	9.24	9.73394	11.1614	0.0232242	8.60733	9.86937	0.0232056	chr8	143437655	143541453	143489554	-	protein_coding	KNOWN	ZC3H3	2	12	1.58664	Decile 10	Vigintile 20	Expr 50-60%
ENSG00000014216.15	ENST00000279247.10,ENST00000524773.5,ENST00000525013.1,ENST00000526468.1,ENST00000526954.5,ENST00000526966.5,ENST00000527189.5,ENST00000527323.5,ENST00000527469.1,ENST00000527699.5,ENST00000527739.5,ENST00000527887.1,ENST00000527897.1,ENST00000528165.5,ENST00000528396.5,ENST00000528739.5,ENST00000529133.5,ENST00000530442.5,ENST00000530495.1,ENST00000530567.1,ENST00000531068.5,ENST00000532285.1,EN…	2548.93	2328.83	6735	107.74	90.68	6735	0	106.65	94.3	101.951	111.279	0.0149626	90.2476	98.4805	0.0149131	chr11	65180566	65212006	65196286	+	protein_coding	KNOWN	CAPN1	28	22	1.58396	Decile 10	Vigintile 20	Expr 93-94%
ENSG00000014257.15	ENST00000336375.9,ENST00000351273.11,ENST00000475741.5,ENST00000483689.1,ENST00000489084.5,ENST00000493235.5,ENST00000495911.5,ENST00000507647.1,ENST00000512463.1	2067.77	1847.67	78	1.57	1.32	78	0	2.51	2.22	1.72655	3.3729	0.114042	1.52184	2.97888	0.11404	chr3	132317367	132368298	132342832	+	protein_coding	KNOWN	ACPP	9	11	-0.202958	Decile 6	Vigintile 11	Expr 20-30%
ENSG00000014641.17	ENST00000233114.12,ENST00000409476.5,ENST00000409908.5,ENST00000421012.1,ENST00000432309.5,ENST00000436321.5,ENST00000442225.5,ENST00000454035.5,ENST00000462944.1,ENST00000472098.5,ENST00000484538.1,ENST00000485155.1,ENST00000485781.5,ENST00000495083.1,ENST00000539945.5,ENST00000544381.3	1466.09	1245.97	8224	245.89	206.96	8224	0	234.87	207.68	227.822	242.223	0.0105345	201.393	214.075	0.0105276	chr2	63588609	63607197	63597903	+	protein_coding	KNOWN	MDH1	16	9	-0.109807	Decile 7	Vigintile 13	Expr 97-98%
ENSG00000014824.13	ENST00000264451.11,ENST00000505523.1,ENST00000509683.5,ENST00000510460.1,ENST00000513699.5	2659.83	2439.71	1929	29.46	24.79	1929	0	28.69	25.37	26.0445	31.2918	0.0316808	23.0433	27.6854	0.0317271	chr4	41990472	42090457	42040464	+	protein_coding	KNOWN	SLC30A9	5	19	-0.34314	Decile 5	Vigintile 9	Expr 70-80%
ENSG00000014914.19	ENST00000369140.7,ENST00000439741.2,ENST00000466496.5,ENST00000479272.1,ENST00000482025.5,ENST00000482343.5,ENST00000490310.1,ENST00000492824.5,ENST00000493562.1,ENST00000495054.1	2456.82	2236.71	109	1.82	1.53	109	0	2.23	1.98	1.64027	2.89084	0.0960639	1.45232	2.55875	0.0959737	chr1	149928651	149936898	149932774	-	protein_coding	KNOWN	MTMR11	10	17	0.870885	Decile 10	Vigintile 19	Expr 20-30%
ENSG00000014919.12	ENST00000016171.5,ENST00000370483.9,ENST00000497381.1	2343.82	2123.73	1274	22.35	18.81	1274	0	21.42	18.94	19.6428	23.3919	0.0298317	17.311	20.6295	0.0298224	chr10	99711844	99732100	99721972	-	protein_coding	KNOWN	COX15	3	9	-0.089859	Decile 7	Vigintile 13	Expr 70-80%
ENSG00000015133.18	ENST00000331194.8,ENST00000334448.5,ENST00000389856.9,ENST00000389857.10,ENST00000553403.1,ENST00000553437.1,ENST00000554051.1,ENST00000554165.1,ENST00000554872.5,ENST00000555995.1,ENST00000556726.5,ENST00000556767.1,ENST00000557455.1,ENST00000557507.1	5650.7	5430.59	3227.61	22.14	18.64	3227.62	0.49	22.2	19.63	20.4928	24.0033	0.027031	18.1138	21.2168	0.0269857	chr14	91271323	91417844	91344583	-	protein_coding	KNOWN	CCDC88C	14	30	0.613728	Decile 9	Vigintile 18	Expr 70-80%
ENSG00000015153.14	ENST00000327791.8,ENST00000380790.4,ENST00000534854.6,ENST00000541702.2,ENST00000546726.5,ENST00000546782.1,ENST00000546972.5,ENST00000547254.5,ENST00000547351.5,ENST00000547622.5,ENST00000547724.1,ENST00000548661.5,ENST00000548917.1,ENST00000550315.1,ENST00000551268.5,ENST00000551528.5,ENST00000552109.5,ENST00000552928.5,ENST00000555248.2	1776.05	1555.98	23	0.55	0.46	23	0	2.67	2.36	1.32376	4.3728	0.193839	1.17971	3.87509	0.193847	chr12	42157104	42238349	42197726	-	protein_coding	KNOWN	YAF2	19	7	-0.312866	Decile 5	Vigintile 10	Expr 10-20%
ENSG00000015171.18	ENST00000309776.8,ENST00000381584.5,ENST00000381591.5,ENST00000381604.8,ENST00000381607.8,ENST00000397955.6,ENST00000397959.7,ENST00000397962.7,ENST00000402736.5,ENST00000403354.5,ENST00000439456.5,ENST00000473115.1,ENST00000488275.1,ENST00000509513.6,ENST00000558098.4,ENST00000602682.5,ENST00000627286.1	2782.78	2562.66	807	11.73	9.87	807	0	12.08	10.68	10.8539	13.4114	0.0363508	9.58673	11.8449	0.0363763	chr10	134465	254637	194551	+	protein_coding	KNOWN	ZMYND11	17	15	0.022817	Decile 7	Vigintile 14	Expr 50-60%
ENSG00000015285.10	ENST00000376701.4,ENST00000450772.5,ENST00000465982.5,ENST00000470107.1,ENST00000474174.1,ENST00000483750.5,ENST00000490627.1	1492.01	1271.9	16	0.47	0.39	16	0	2.39	2.11	0.63473	5.04636	0.337421	0.561636	4.46409	0.337336	chrX	48676596	48691427	48684011	+	protein_coding	KNOWN	WAS	7	12	1.21514	Decile 10	Vigintile 20	Expr 10-20%
ENSG00000015413.9	ENST00000261615.5,ENST00000393092.7,ENST00000421184.5,ENST00000561484.1,ENST00000564281.5,ENST00000564645.1,ENST00000565249.5,ENST00000568281.5,ENST00000570029.5	1520.05	1299.94	42	1.2	1.01	42	0	1.85	1.64	1.22059	2.56536	0.125982	1.08135	2.27033	0.125917	chr16	89613308	89638456	89625882	+	protein_coding	KNOWN	DPEP1	9	11	1.68621	Decile 10	Vigintile 20	Expr 20-30%
ENSG00000015475.18	ENST00000317361.11,ENST00000342111.9,ENST00000399765.5,ENST00000399767.5,ENST00000399774.7,ENST00000473439.5,ENST00000494097.5,ENST00000550946.5,ENST00000551952.5,ENST00000552886.1,ENST00000611040.1,ENST00000614949.4,ENST00000615414.4,ENST00000617586.1,ENST00000622694.4	1052.6	832.55	746	33.38	28.1	746	0	32.45	28.69	27.7399	37.1929	0.050677	24.5348	32.895	0.0507361	chr22	17734138	17774770	17754454	-	protein_coding	KNOWN	BID	15	7	0.645005	Decile 9	Vigintile 18	Expr 70-80%
ENSG00000015479.17	ENST00000394805.7,ENST00000502422.5,ENST00000502499.5,ENST00000502944.1,ENST00000503340.1,ENST00000503811.5,ENST00000504023.1,ENST00000504045.5,ENST00000504311.5,ENST00000504643.5,ENST00000505625.5,ENST00000507860.1,ENST00000508689.1,ENST00000509918.5,ENST00000510056.5,ENST00000511249.5,ENST00000511333.5,ENST00000511378.1,ENST00000511978.5,ENST00000512040.1,ENST00000512876.5,ENST00000513121.1,ENS…	2258.32	2038.22	9807.42	179.26	150.87	9621.76	327.91	169.34	149.73	155.708	182.971	0.0292279	137.657	161.797	0.0292102	chr5	139293648	139331359	139312503	+	protein_coding	KNOWN	MATR3	27	15	0.424509	Decile 9	Vigintile 17	Expr 96-97%
ENSG00000015520.14	ENST00000289547.8,ENST00000381160.7,ENST00000423141.1,ENST00000546276.5	4141	3920.89	7	0.07	0.06	7	0	0.1	0.09	0.0446455	0.172678	0.216187	0.0395199	0.15277	0.216212	chr7	44512535	44541315	44526925	-	protein_coding	KNOWN	NPC1L1	4	20	0.653241	Decile 9	Vigintile 18	Expr 0-10%
ENSG00000015532.9	ENST00000017003.6,ENST00000376550.7,ENST00000507602.5,ENST00000509778.1,ENST00000511654.1,ENST00000571021.1,ENST00000574840.1	3232.86	3012.74	1508	18.65	15.69	1508	0	50.71	44.84	17.2788	116.583	0.397334	15.2706	103.113	0.397482	chr17	50346092	50363138	50354615	+	protein_coding	KNOWN	XYLT2	7	11	1.008	Decile 10	Vigintile 19	Expr 60-70%
ENSG00000015568.12	ENST00000016946.7,ENST00000272454.10,ENST00000393283.5,ENST00000413468.1,ENST00000430736.5,ENST00000432606.1,ENST00000441344.1,ENST00000472794.1,ENST00000477523.1,ENST00000482778.1,ENST00000493394.1,ENST00000495473.1,ENST00000495582.1	5830.02	5609.91	484.05	3.21	2.71	576.75	182.22	9.93	8.78	3.33606	20.0317	0.303129	2.95452	17.7262	0.303139	chr2	109792758	109857695	109825226	+	protein_coding	KNOWN	RGPD5	13	23	-0.055596	Decile 7	Vigintile 13	Expr 30-40%
ENSG00000015592.16	ENST00000265770.11,ENST00000350889.8,ENST00000519614.5,ENST00000519997.5,ENST00000522750.1,ENST00000522908.1,ENST00000523048.5	1337.14	1117.03	0	0	0	0	0	0.26	0.23	0.0765829	0.476445	0.275631	0.0677238	0.421348	0.275796	chr8	27235323	27258420	27246871	-	protein_coding	KNOWN	STMN4	7	8	-0.219653	Decile 6	Vigintile 11	Non-expressed
ENSG00000015676.17	ENST00000338427.10,ENST00000355451.7,ENST00000460110.5,ENST00000464812.1,ENST00000472246.5,ENST00000475952.1,ENST00000478769.1,ENST00000480209.1,ENST00000487118.1,ENST00000493613.5,ENST00000497978.1	2515.44	2295.34	2815	45.69	38.45	2815	0	45.1	39.88	41.0097	49.1213	0.0312314	36.3391	43.5102	0.0312155	chr7	44379121	44490880	44435000	-	protein_coding	KNOWN	NUDCD3	11	7	0.627483	Decile 9	Vigintile 18	Expr 80-90%
ENSG00000016082.14	ENST00000230658.11,ENST00000505475.3,ENST00000511384.1	2459	2238.89	11	0.18	0.15	11	0	0.28	0.25	0.132131	0.447647	0.197923	0.114612	0.393555	0.197826	chr5	51383391	51394738	51389064	+	protein_coding	KNOWN	ISL1	3	6	-0.103067	Decile 7	Vigintile 13	Expr 10-20%
ENSG00000016391.10	ENST00000315251.10,ENST00000467802.1,ENST00000481668.5	7665	7444.89	1215.6	6.08	5.12	1215.98	1.65	6.04	5.34	5.58158	6.5701	0.0271091	4.92638	5.79973	0.0270487	chr3	53812335	53846390	53829362	-	protein_coding	KNOWN	CHDH	3	9	0.711981	Decile 10	Vigintile 19	Expr 40-50%
ENSG00000016402.13	ENST00000316649.9,ENST00000367746.3,ENST00000367748.4,ENST00000460306.1,ENST00000461799.1,ENST00000468393.5,ENST00000541547.5,ENST00000635289.1	2218.42	1998.36	76	1.42	1.19	76	0	1.96	1.74	1.17406	2.84047	0.147723	1.04699	2.52054	0.14781	chr6	136999971	137045180	137022575	-	protein_coding	KNOWN	IL20RA	8	7	-0.265252	Decile 5	Vigintile 10	Expr 20-30%
ENSG00000016490.15	ENST00000234701.7,ENST00000394711.1	3214	2993.89	0	0	0	0	0	0.02	0.02	0.00066857	0.0557359	0.471783	0.000566353	0.0492745	0.471718	chr1	86468368	86500289	86484328	+	protein_coding	KNOWN	CLCA1	2	15	-0.535976	Decile 3	Vigintile 5	Non-expressed
ENSG00000016602.9	ENST00000370563.3,ENST00000496322.1	1846.5	1626.44	0	0	0	0	0	0.15	0.13	0.000794844	0.41119	0.592959	0.000336682	0.363319	0.593055	chr1	86547078	86580754	86563916	+	protein_coding	KNOWN	CLCA4	2	14	-0.535888	Decile 3	Vigintile 5	Non-expressed
ENSG00000016864.16	ENST00000266014.9,ENST00000394783.7,ENST00000407584.7,ENST00000463762.1,ENST00000463827.1,ENST00000464705.1,ENST00000478968.6,ENST00000479553.5,ENST00000480080.1,ENST00000481643.5,ENST00000484163.5,ENST00000485899.1,ENST00000487642.5,ENST00000489119.5,ENST00000491606.5,ENST00000497436.5,ENST00000497953.5	1312.45	1092.34	966.17	32.95	27.73	965.9	1.1	32.75	28.96	29.7092	35.7217	0.0316729	26.3611	31.6782	0.0316539	chr3	52694485	52706083	52700284	-	protein_coding	KNOWN	GLT8D1	17	13	1.24242	Decile 10	Vigintile 20	Expr 70-80%
ENSG00000017260.19	ENST00000328560.12,ENST00000359644.7,ENST00000422190.6,ENST00000428331.6,ENST00000504381.5,ENST00000504571.5,ENST00000504612.5,ENST00000504948.5,ENST00000505072.5,ENST00000505330.5,ENST00000507194.1,ENST00000507488.6,ENST00000508297.2,ENST00000508532.5,ENST00000508660.5,ENST00000509150.1,ENST00000509662.5,ENST00000510168.5,ENST00000510774.1,ENST00000513636.1,ENST00000513801.5,ENST00000514654.5,EN…	3238.24	3018.13	3296.43	40.69	34.25	3296.46	0.69	41	36.25	37.2272	44.8263	0.0325345	32.9269	39.6478	0.0325094	chr3	130850595	131016712	130933653	+	protein_coding	KNOWN	ATP2C1	24	28	-0.331676	Decile 5	Vigintile 9	Expr 80-90%
ENSG00000017427.15	ENST00000307046.8,ENST00000337514.10,ENST00000392904.5,ENST00000392905.6,ENST00000424202.6,ENST00000456098.5,ENST00000481539.1	2572.29	2352.23	0	0	0	0	0	0.61	0.54	0.118489	1.23406	0.337342	0.104604	1.09209	0.337185	chr12	102395867	102480645	102438256	-	protein_coding	KNOWN	IGF1	7	6	-0.371915	Decile 5	Vigintile 9	Non-expressed
ENSG00000017483.14	ENST00000413668.5,ENST00000416711.5,ENST00000429543.2,ENST00000440085.5,ENST00000441948.5,ENST00000480105.1,ENST00000488083.5,ENST00000494034.5,ENST00000497336.1,ENST00000595796.5,ENST00000615300.4,ENST00000619100.4,ENST00000620913.4,ENST00000622196.4	1807.97	1587.86	1908	44.76	37.68	1908	0	44.55	39.39	41.8382	47.3551	0.021337	37.0235	41.8997	0.0212457	chrX	48458537	48470256	48464396	-	protein_coding	KNOWN	SLC38A5	14	17	0.509046	Decile 9	Vigintile 18	Expr 80-90%
ENSG00000017797.11	ENST00000019317.8,ENST00000383432.7,ENST00000458039.3,ENST00000577221.1,ENST00000585015.5	4070.73	3850.62	2875	27.81	23.41	2875	0	26.63	23.55	25.4749	27.7805	0.0149776	22.5601	24.5889	0.014925	chr18	9475009	9538116	9506562	+	protein_coding	KNOWN	RALBP1	5	10	0.182283	Decile 8	Vigintile 16	Expr 70-80%
ENSG00000018189.12	ENST00000226328.8,ENST00000381006.7,ENST00000417478.6,ENST00000502653.5,ENST00000503025.5,ENST00000503876.5,ENST00000504805.6,ENST00000507333.5,ENST00000512103.5,ENST00000512331.5,ENST00000513593.1,ENST00000513597.5,ENST00000514898.1,ENST00000515442.1,ENST00000515479.5	1790.37	1570.28	595.53	14.13	11.89	595.5	0.5	15.46	13.67	13.1179	17.8038	0.0523784	11.61	15.7561	0.0523693	chr4	70704204	70807315	70755759	+	protein_coding	KNOWN	RUFY3	15	19	-0.420396	Decile 4	Vigintile 8	Expr 60-70%
ENSG00000018236.14	ENST00000347616.5,ENST00000348761.2,ENST00000547702.5,ENST00000547849.5,ENST00000548005.5,ENST00000548481.1,ENST00000550305.1,ENST00000551295.6,ENST00000551424.5,ENST00000552248.5,ENST00000552913.5	4110.78	3890.66	807	7.73	6.5	807	0	8.48	7.5	7.40008	9.64852	0.0455057	6.53134	8.52206	0.0454562	chr12	40692442	41072418	40882430	+	protein_coding	KNOWN	CNTN1	11	24	-0.505686	Decile 3	Vigintile 6	Expr 40-50%
ENSG00000018280.16	ENST00000233202.10,ENST00000354352.9,ENST00000460592.1,ENST00000465984.5,ENST00000468221.5,ENST00000468721.1,ENST00000469449.1,ENST00000469799.5,ENST00000471875.5,ENST00000473367.5,ENST00000475225.5,ENST00000481524.5,ENST00000483487.2,ENST00000490536.1,ENST00000490872.1,ENST00000492413.5,ENST00000494322.5,ENST00000539932.5	4230.32	4010.21	5	0.05	0.04	5	0	1.84	1.62	0.667856	3.3583	0.253111	0.611641	2.99162	0.253113	chr2	218382029	218396894	218389461	+	protein_coding	KNOWN	SLC11A1	18	16	0.893119	Decile 10	Vigintile 19	Expr 0-10%
ENSG00000018408.14	ENST00000360632.7,ENST00000460517.1,ENST00000465804.5,ENST00000467467.5,ENST00000471586.5,ENST00000472417.1,ENST00000474080.1,ENST00000475579.1,ENST00000479238.1,ENST00000485244.1,ENST00000485352.1,ENST00000494754.1	2055	1834.91	477.88	9.7	8.17	477.72	0.61	10.56	9.34	8.55885	12.7706	0.0690877	7.53643	11.2613	0.0690802	chr3	149517235	149736714	149626974	-	protein_coding	KNOWN	WWTR1	12	8	-0.261037	Decile 6	Vigintile 11	Expr 50-60%
ENSG00000018510.12	ENST00000264167.8,ENST00000409888.1,ENST00000460342.1	7672.57	7452.46	1646.01	8.23	6.93	1646.01	0.09	8.06	7.12	7.51868	8.6354	0.0231351	6.66309	7.64936	0.0230787	chr2	177392644	177543836	177468240	+	protein_coding	KNOWN	AGPS	3	20	-0.286938	Decile 5	Vigintile 10	Expr 40-50%
ENSG00000018610.13	ENST00000320339.8,ENST00000469448.1,ENST00000536133.2	1596.83	1376.73	645.66	17.47	14.7	645.66	0.55	16.77	14.83	15.0162	18.575	0.0364193	13.2696	16.4169	0.0364055	chrX	119538149	119565408	119551778	-	protein_coding	KNOWN	CXorf56	3	7	0.118998	Decile 8	Vigintile 15	Expr 60-70%
ENSG00000018625.14	ENST00000361216.7,ENST00000392233.7,ENST00000447527.1,ENST00000459972.1,ENST00000463989.1,ENST00000468587.1,ENST00000472488.5,ENST00000478587.1	4566.83	4346.74	3701	31.72	26.7	3701	0	31.1	27.5	28.238	34.2764	0.0338123	24.9909	30.3353	0.03383	chr1	160115759	160143591	160129675	+	protein_coding	KNOWN	ATP1A2	8	23	0.987512	Decile 10	Vigintile 19	Expr 70-80%
ENSG00000018699.11	ENST00000317907.8,ENST00000428527.1,ENST00000433416.5,ENST00000438654.1,ENST00000448773.5,ENST00000454690.1	2876	2655.89	1044.95	14.66	12.34	1044.95	0.22	15.22	13.46	13.7838	16.7346	0.0326506	12.2042	14.8152	0.0325882	chr2	32628032	32821051	32724541	+	protein_coding	KNOWN	TTC27	6	20	-0.234631	Decile 6	Vigintile 11	Expr 60-70%
ENSG00000018869.16	ENST00000301310.8,ENST00000586929.5,ENST00000587778.5,ENST00000589143.5,ENST00000589895.1,ENST00000593145.5,ENST00000619584.4	1434.5	1214.41	83	2.55	2.14	83	0	2.88	2.55	2.05107	3.8024	0.1058	1.81714	3.36641	0.105871	chr19	56375846	56393545	56384695	-	protein_coding	KNOWN	ZNF582	7	5	0.747697	Decile 10	Vigintile 19	Expr 30-40%
ENSG00000019102.11	ENST00000326621.9,ENST00000403470.1	1148	927.89	3	0.12	0.1	3	0	0.19	0.17	0.0432367	0.352243	0.301969	0.0383024	0.311613	0.301829	chr11	124747472	124752238	124749855	-	protein_coding	KNOWN	VSIG2	2	7	0.242945	Decile 8	Vigintile 16	Expr 0-10%
ENSG00000019144.16	ENST00000356063.9,ENST00000361417.6,ENST00000392852.7,ENST00000524713.5,ENST00000525226.5,ENST00000525427.1,ENST00000526374.5,ENST00000526537.2,ENST00000526699.5,ENST00000526826.1,ENST00000527259.5,ENST00000527500.5,ENST00000527898.5,ENST00000528594.5,ENST00000528875.5,ENST00000529005.5,ENST00000530708.4,ENST00000530994.5,ENST00000531987.2,ENST00000532517.5,ENST00000532639.3,ENST00000534140.2,ENS…	2660.05	2439.96	3570.25	54.51	45.88	3570.14	1.95	53.4	47.22	50.233	56.7938	0.021221	44.4453	50.245	0.0212305	chr11	118606440	118658038	118632239	+	protein_coding	KNOWN	PHLDB1	29	24	1.19318	Decile 10	Vigintile 20	Expr 80-90%
ENSG00000019169.10	ENST00000327097.4,ENST00000412481.1,ENST00000494979.1	987.67	767.6	0	0	0	0	0	0.23	0.2	0.0182561	0.519593	0.430156	0.0161467	0.459514	0.430228	chr2	118942166	118994660	118968413	+	protein_coding	KNOWN	MARCO	3	17	-0.364498	Decile 5	Vigintile 9	Non-expressed
ENSG00000019186.9	ENST00000216862.7,ENST00000395954.3,ENST00000395955.7,ENST00000460643.1,ENST00000472970.1,ENST00000487593.1	1399.33	1179.29	0	0	0	0	0	0.55	0.49	0.0872003	1.16621	0.368127	0.0769045	1.03153	0.368237	chr20	54153449	54173973	54163711	-	protein_coding	KNOWN	CYP24A1	6	12	-0.254201	Decile 6	Vigintile 11	Non-expressed
ENSG00000019485.12	ENST00000424263.6,ENST00000526442.5,ENST00000528980.1,ENST00000530656.5,ENST00000534751.2,ENST00000622142.4	7008.52	6788.41	560	3.07	2.59	560	0	3.32	2.93	2.67061	4.01134	0.0703674	2.35661	3.54293	0.0703018	chr11	45095806	45235124	45165465	+	protein_coding	KNOWN	PRDM11	6	8	0.59883	Decile 9	Vigintile 18	Expr 30-40%
ENSG00000019505.7	ENST00000020926.7,ENST00000528101.1,ENST00000533332.1	5144	4923.89	580	4.39	3.69	579.98	0.14	4.78	4.22	4.01358	5.76826	0.0642731	3.55498	5.10707	0.064287	chr11	45240301	45286319	45263310	-	protein_coding	KNOWN	SYT13	3	8	0.412266	Decile 9	Vigintile 17	Expr 30-40%
ENSG00000019549.8	ENST00000020945.2,ENST00000396822.5	2099	1878.89	25	0.5	0.42	25	0	0.5	0.44	0.320217	0.69133	0.129119	0.28286	0.611049	0.129052	chr8	48917690	48921740	48919715	-	protein_coding	KNOWN	SNAI2	2	4	-0.236806	Decile 6	Vigintile 11	Expr 10-20%
ENSG00000019582.14	ENST00000009530.11,ENST00000353334.10,ENST00000377795.7,ENST00000517752.5,ENST00000517791.1,ENST00000518797.5,ENST00000522153.1,ENST00000522246.5,ENST00000523208.5,ENST00000523813.1,ENST00000523836.5,ENST00000524315.5	1285.86	1065.75	1899	66.38	55.87	1899	0	63.9	56.5	60.9103	66.9146	0.0162866	53.9335	59.2459	0.016253	chr5	150401637	150412929	150407283	-	protein_coding	KNOWN	CD74	12	9	1.03848	Decile 10	Vigintile 20	Expr 80-90%
ENSG00000019991.15	ENST00000222390.9,ENST00000354224.10,ENST00000412881.5,ENST00000421558.1,ENST00000423064.6,ENST00000444829.6,ENST00000453018.1,ENST00000453411.5,ENST00000457544.6,ENST00000465234.1	1358.55	1138.43	4	0.13	0.11	4	0	0.62	0.55	0.270409	1.03883	0.220472	0.24022	0.919932	0.220562	chr7	81699006	81770438	81734722	-	protein_coding	KNOWN	HGF	10	18	-0.658866	Decile 2	Vigintile 3	Expr 0-10%
ENSG00000019995.6	ENST00000359653.4,ENST00000471421.1	5695	5474.89	926.73	6.31	5.31	927.06	13.25	6.09	5.38	5.62403	6.56587	0.0262056	4.97446	5.80712	0.0261796	chr10	124942123	124988189	124965156	+	protein_coding	KNOWN	ZRANB1	2	9	0.123367	Decile 8	Vigintile 15	Expr 40-50%
ENSG00000020129.15	ENST00000356090.8,ENST00000373243.6,ENST00000373253.7,ENST00000423723.1,ENST00000437806.1,ENST00000459931.1	3185.55	2965.43	1896	23.82	20.05	1896	0	22.78	20.14	21.4737	24.0587	0.0194523	19.0044	21.2838	0.0194213	chr1	35557473	35567274	35562373	+	protein_coding	KNOWN	NCDN	6	8	0.7712	Decile 10	Vigintile 19	Expr 70-80%
ENSG00000020181.17	ENST00000315215.11,ENST00000412232.2,ENST00000428068.5	5803.25	5583.13	239.25	1.6	1.34	239.98	3.36	1.77	1.56	1.37421	2.24662	0.082616	1.21627	1.98749	0.0826746	chr8	37784191	37844896	37814543	+	protein_coding	KNOWN	ADGRA2	3	19	0.774893	Decile 10	Vigintile 19	Expr 20-30%
ENSG00000020256.19	ENST00000216923.4,ENST00000346617.8,ENST00000361387.6,ENST00000371515.8,ENST00000371518.6,ENST00000371523.8,ENST00000395979.1,ENST00000395989.7,ENST00000456175.5,ENST00000461898.1,ENST00000467811.5,ENST00000477786.5	2502.24	2282.13	1136	18.54	15.61	1136	0	18.52	16.37	17.0502	20.0297	0.0273001	15.0681	17.7013	0.0272949	chr20	52051663	52204308	52127985	-	protein_coding	KNOWN	ZFP64	12	9	0.199749	Decile 8	Vigintile 16	Expr 60-70%
ENSG00000020426.10	ENST00000261245.8,ENST00000539616.6,ENST00000553354.5,ENST00000554002.5,ENST00000554641.1,ENST00000555545.1,ENST00000556525.1,ENST00000556764.5,ENST00000557134.1	906.98	686.89	462	25.06	21.09	462	0	24.99	22.1	22.2031	27.8282	0.0378416	19.6515	24.619	0.0378521	chr14	60734742	60969953	60852347	+	protein_coding	KNOWN	MNAT1	9	8	-0.340663	Decile 5	Vigintile 9	Expr 70-80%
ENSG00000020577.13	ENST00000251091.9,ENST00000392067.7,ENST00000553988.5,ENST00000554335.5,ENST00000554587.1,ENST00000555091.1,ENST00000555112.1,ENST00000555192.1,ENST00000555719.1,ENST00000556069.5,ENST00000557013.1,ENST00000557692.2,ENST00000631086.2	5660.24	5440.12	676	4.63	3.9	676	0	5.75	5.09	4.67044	6.99523	0.0692691	4.12491	6.18269	0.0692072	chr14	54567097	54793315	54680206	+	protein_coding	KNOWN	SAMD4A	13	13	-0.052036	Decile 7	Vigintile 13	Expr 30-40%
ENSG00000020633.18	ENST00000308873.10,ENST00000338888.3,ENST00000399916.5,ENST00000479341.1,ENST00000496967.1	3861	3640.89	43	0.44	0.37	43	0	1.11	0.98	0.388894	2.24804	0.302095	0.343657	1.98717	0.302033	chr1	24899511	24965121	24932316	-	protein_coding	KNOWN	RUNX3	5	7	0.925439	Decile 10	Vigintile 19	Expr 10-20%
ENSG00000020922.12	ENST00000323929.7,ENST00000323977.7,ENST00000393241.8,ENST00000407439.7,ENST00000535120.1,ENST00000536144.1,ENST00000536754.5,ENST00000538923.1,ENST00000540013.5,ENST00000541157.5	3399.28	3179.17	1266	14.84	12.49	1266	0	17.16	15.17	13.5403	21.7209	0.0770482	12.0083	19.246	0.0771171	chr11	94415578	94493908	94454743	-	protein_coding	KNOWN	MRE11A	10	20	-0.239964	Decile 6	Vigintile 11	Expr 60-70%
ENSG00000021300.13	ENST00000227214.10,ENST00000354190.9,ENST00000398492.8,ENST00000398494.8,ENST00000426191.2,ENST00000535129.5,ENST00000535582.5,ENST00000536527.5,ENST00000538227.5,ENST00000539157.5,ENST00000540157.1,ENST00000540431.1,ENST00000541597.5,ENST00000541760.1,ENST00000542389.5,ENST00000543085.5,ENST00000543524.5,ENST00000544282.1,ENST00000544532.5,ENST00000545106.1,ENST00000545798.5,ENST00000546251.5	1538.54	1318.49	415	11.73	9.87	415	0	13.91	12.3	11.0003	16.7944	0.0729332	9.7976	14.9228	0.0728604	chr11	73646178	73662819	73654498	+	protein_coding	KNOWN	PLEKHB1	22	8	0.859655	Decile 10	Vigintile 19	Expr 50-60%
ENSG00000021355.12	ENST00000380739.5,ENST00000460260.1,ENST00000468511.5,ENST00000476896.5,ENST00000490094.5	2475.88	2255.76	487	8.04	6.77	487	0	8.44	7.46	7.39052	9.61857	0.0450052	6.53134	8.50356	0.0450262	chr6	2832332	2842006	2837169	-	protein_coding	KNOWN	SERPINB1	5	7	-0.056921	Decile 7	Vigintile 13	Expr 40-50%
ENSG00000021461.16	ENST00000222382.5,ENST00000312017.9,ENST00000342499.8,ENST00000354829.6,ENST00000415413.5,ENST00000417625.5,ENST00000433277.5,ENST00000434806.5,ENST00000436834.5,ENST00000444905.5,ENST00000463915.5,ENST00000472352.1,ENST00000477658.5,ENST00000481362.5,ENST00000491648.5,ENST00000495115.5,ENST00000631161.2	1131.06	910.97	0	0	0	0	0	1.1	0.97	0.459014	1.92673	0.231477	0.406449	1.70403	0.231587	chr7	99828013	99866102	99847057	+	protein_coding	KNOWN	CYP3A43	17	14	0.705704	Decile 10	Vigintile 19	Non-expressed
ENSG00000021488.12	ENST00000023064.8,ENST00000587772.1,ENST00000589659.1,ENST00000590341.5,ENST00000590465.5,ENST00000592232.5	1568	1347.89	2	0.06	0.05	2	0	0.23	0.21	0.0807242	0.410464	0.248139	0.0717997	0.363482	0.248277	chr19	32830509	32869766	32850137	-	protein_coding	KNOWN	SLC7A9	6	13	0.460592	Decile 9	Vigintile 18	Expr 0-10%
ENSG00000021574.11	ENST00000315285.7,ENST00000345662.5,ENST00000615843.4,ENST00000621856.1	2875.25	2655.13	620	8.7	7.32	620	0	8.28	7.32	7.39089	9.16449	0.0370918	6.53786	8.10694	0.0371033	chr2	32063611	32157637	32110624	+	protein_coding	KNOWN	SPAST	4	17	0.011586	Decile 7	Vigintile 14	Expr 50-60%
ENSG00000021645.18	ENST00000281127.11,ENST00000335750.6,ENST00000428277.6,ENST00000553363.5,ENST00000553631.1,ENST00000553803.5,ENST00000554719.5,ENST00000554738.5,ENST00000555073.5,ENST00000555387.1,ENST00000556003.1,ENST00000556088.1,ENST00000556496.2,ENST00000557081.1,ENST00000557594.5,ENST00000634266.1,ENST00000634499.1,ENST00000635466.1	4104.44	3884.32	160	1.53	1.29	160	0	2.4	2.12	1.7938	3.05173	0.090611	1.59718	2.70969	0.0905608	chr14	78170373	79868290	79019331	+	protein_coding	KNOWN	NRXN3	18	20	-0.406491	Decile 4	Vigintile 8	Expr 20-30%
ENSG00000021762.19	ENST00000263650.11,ENST00000348039.9,ENST00000389989.7,ENST00000459995.5,ENST00000465323.1,ENST00000471998.6,ENST00000477622.1,ENST00000478260.5,ENST00000498536.5,ENST00000525498.5,ENST00000526122.5,ENST00000528124.1,ENST00000530372.5,ENST00000532951.1,ENST00000533234.5,ENST00000533721.5,ENST00000534157.1,ENST00000534454.5,ENST00000534491.5	3428.14	3208.03	418	4.85	4.09	418	0	6.57	5.81	5.39886	7.83562	0.0649694	4.75803	6.91538	0.0649498	chr11	3087116	3166739	3126927	-	protein_coding	KNOWN	OSBPL5	19	22	1.04473	Decile 10	Vigintile 20	Expr 40-50%
ENSG00000021776.10	ENST00000156471.9,ENST00000543879.6,ENST00000558202.1,ENST00000559090.5,ENST00000559767.1,ENST00000560117.1	7327.49	7107.38	3082	16.15	13.6	3082	0	15.74	13.92	14.303	17.3272	0.0351379	12.6636	15.3378	0.0350608	chr15	34851782	34969839	34910810	-	protein_coding	KNOWN	AQR	6	35	-0.084556	Decile 7	Vigintile 13	Expr 60-70%
ENSG00000021826.14	ENST00000233072.9,ENST00000417946.5,ENST00000430249.6,ENST00000451903.2,ENST00000467353.1,ENST00000470791.1,ENST00000479988.1,ENST00000497121.1,ENST00000497163.1,ENST00000518043.5,ENST00000523702.5,ENST00000619804.1	3534.15	3314.06	544	6.12	5.15	544	0	7.46	6.59	5.85645	9.17391	0.077029	5.22093	8.15429	0.076976	chr2	210477682	210679107	210578394	+	protein_coding	KNOWN	CPS1	12	39	-0.503212	Decile 3	Vigintile 6	Expr 40-50%
ENSG00000021852.12	ENST00000371237.8,ENST00000465658.1,ENST00000468990.1,ENST00000494324.1,ENST00000535057.5,ENST00000543257.5	1367.17	1147.12	0	0	0	0	0	0.56	0.5	0.080424	1.23773	0.384207	0.0679835	1.09204	0.384324	chr1	56929210	56966140	56947675	-	protein_coding	KNOWN	C8B	6	13	-0.305144	Decile 5	Vigintile 10	Non-expressed
ENSG00000022267.16	ENST00000345434.7,ENST00000370674.3,ENST00000370676.7,ENST00000370683.5,ENST00000370690.7,ENST00000394153.6,ENST00000394155.6,ENST00000420362.5,ENST00000434885.5,ENST00000449474.5,ENST00000452016.5,ENST00000456445.5,ENST00000458357.5,ENST00000477080.1,ENST00000477204.5,ENST00000535737.5,ENST00000539015.5,ENST00000543669.5,ENST00000618438.4,ENST00000625935.2,ENST00000626004.1,ENST00000627383.2,ENS…	1694.77	1474.68	1498	37.84	31.85	1498	0	38.33	33.89	34.2025	42.611	0.0375193	30.2568	37.695	0.0374511	chrX	136146702	136211359	136179030	+	protein_coding	KNOWN	FHL1	33	8	0.045142	Decile 8	Vigintile 15	Expr 80-90%
ENSG00000022277.12	ENST00000023939.8,ENST00000357348.9,ENST00000395881.7,ENST00000449062.1,ENST00000466260.1,ENST00000477485.1,ENST00000477573.1,ENST00000484084.5,ENST00000487211.5	1745.82	1525.71	1367	33.38	28.09	1366.97	0.17	32.58	28.81	30.2104	35.0554	0.025513	26.7148	30.9968	0.0255269	chr20	56468585	56519449	56494017	+	protein_coding	KNOWN	RTFDC1	9	10	0.127922	Decile 8	Vigintile 15	Expr 70-80%
ENSG00000022355.15	ENST00000023897.10,ENST00000393943.9,ENST00000428797.7,ENST00000437025.6,ENST00000519542.1,ENST00000519621.2,ENST00000521339.5,ENST00000522651.6,ENST00000634335.1,ENST00000635096.1	2580.91	2360.8	366	5.78	4.86	366	0	7.35	6.5	5.87952	9.00015	0.0758397	5.19913	7.9578	0.0758583	chr5	161847191	161899981	161873586	+	protein_coding	KNOWN	GABRA1	10	11	-0.712918	Decile 1	Vigintile 2	Expr 40-50%
ENSG00000022556.15	ENST00000263437.10,ENST00000339757.11,ENST00000381637.3,ENST00000391721.8,ENST00000397169.3,ENST00000427260.6,ENST00000433772.6,ENST00000448584.6,ENST00000537859.5,ENST00000539848.5,ENST00000540005.1,ENST00000540597.5,ENST00000542755.1,ENST00000543010.5,ENST00000543277.1,ENST00000585500.5,ENST00000586512.1,ENST00000588107.5,ENST00000588619.5	3282.97	3062.85	59	0.72	0.6	59	0	2.03	1.79	1.2841	2.85105	0.135072	1.13982	2.52562	0.135009	chr19	54953130	55001142	54977136	+	protein_coding	KNOWN	NLRP2	19	14	1.04155	Decile 10	Vigintile 20	Expr 10-20%
ENSG00000022567.9	ENST00000024061.7,ENST00000517878.5,ENST00000519067.5,ENST00000519986.1,ENST00000520137.1,ENST00000521804.1	4906.77	4686.66	1180	9.38	7.89	1180	0	9.17	8.11	8.29814	10.0798	0.0336463	7.34178	8.91761	0.0336303	chr8	141207166	141308305	141257735	-	protein_coding	KNOWN	SLC45A4	6	8	0.710066	Decile 10	Vigintile 19	Expr 50-60%
ENSG00000022840.15	ENST00000325954.8,ENST00000366112.6,ENST00000413266.6,ENST00000535395.1,ENST00000535417.1,ENST00000535470.5,ENST00000536869.5,ENST00000537376.1,ENST00000537740.1,ENST00000537997.1,ENST00000538254.1,ENST00000538796.5,ENST00000539486.1,ENST00000540046.5,ENST00000542207.5,ENST00000542438.1,ENST00000542701.1,ENST00000543578.1,ENST00000543675.5,ENST00000543757.5,ENST00000544124.1,ENST00000544805.1,ENS…	2049.58	1829.5	6020	122.58	103.17	6020	0	121.79	107.69	110.939	132.966	0.0304027	98.1809	117.631	0.0304099	chr12	120533480	120577594	120555537	+	protein_coding	KNOWN	RNF10	25	17	1.0823	Decile 10	Vigintile 20	Expr 94-95%
ENSG00000022976.15	ENST00000420933.2,ENST00000442396.6,ENST00000557803.5,ENST00000558462.5,ENST00000558490.5,ENST00000558850.5,ENST00000559098.5,ENST00000559155.5,ENST00000559185.5,ENST00000560112.1,ENST00000560568.5,ENST00000561251.5	2205.59	1985.49	305.77	5.74	4.83	307.63	5.43	6.05	5.35	5.1149	7.09339	0.0559453	4.51808	6.27085	0.0558688	chr14	102317377	102342702	102330039	+	protein_coding	KNOWN	ZNF839	12	9	0.927079	Decile 10	Vigintile 19	Expr 40-50%
ENSG00000023041.11	ENST00000369404.3,ENST00000369405.7,ENST00000471035.1,ENST00000482410.5,ENST00000626395.2	1999.22	1779.11	688	14.41	12.13	688	0	14.37	12.7	12.809	16.0315	0.0376985	11.3567	14.2091	0.0377332	chr10	112424428	112446917	112435672	-	protein_coding	KNOWN	ZDHHC6	5	12	-0.106623	Decile 7	Vigintile 13	Expr 60-70%
ENSG00000023171.14	ENST00000322282.11,ENST00000450171.2,ENST00000456860.6,ENST00000525757.1,ENST00000525945.1,ENST00000529432.5,ENST00000529750.5,ENST00000532581.5,ENST00000534764.1,ENST00000632815.1,ENST00000633087.1,ENST00000633646.1	4118.86	3898.76	860	8.22	6.92	860	0	8.24	7.29	7.04239	9.43966	0.0504108	6.24257	8.36257	0.0503543	chr11	123454398	123627774	123541086	+	protein_coding	KNOWN	GRAMD1B	12	21	0.358884	Decile 9	Vigintile 17	Expr 40-50%
ENSG00000023191.16	ENST00000354420.6,ENST00000356187.9,ENST00000397604.7,ENST00000397614.5,ENST00000397615.6,ENST00000438658.6,ENST00000524464.5,ENST00000524780.5,ENST00000525522.5,ENST00000525701.5,ENST00000526295.1,ENST00000527485.5,ENST00000528713.5,ENST00000529115.5,ENST00000529306.5,ENST00000529368.5,ENST00000529768.5,ENST00000531149.1,ENST00000531223.1,ENST00000531540.5,ENST00000532055.5,ENST00000533410.5,ENS…	1750.79	1530.68	1643	39.99	33.66	1643	0	39.44	34.88	37.1749	41.7566	0.0199463	32.9066	36.9628	0.0198953	chr11	494512	507300	500906	-	protein_coding	KNOWN	RNH1	24	11	2.0039	Decile 10	Vigintile 20	Expr 80-90%
ENSG00000023228.13	ENST00000233190.10,ENST00000423725.5,ENST00000432169.5,ENST00000440274.5,ENST00000449699.5,ENST00000454195.1,ENST00000455934.6,ENST00000456284.5,ENST00000457011.5,ENST00000498520.1	2391.21	2171.11	3587.24	61.55	51.81	3583.66	3.87	58.76	51.95	55.429	62.0919	0.0194305	49.0474	54.9369	0.0193932	chr2	206114817	206159603	206137210	-	protein_coding	KNOWN	NDUFS1	10	19	0.131231	Decile 8	Vigintile 15	Expr 80-90%
ENSG00000023287.12	ENST00000025008.9,ENST00000435644.6,ENST00000517963.1,ENST00000518211.1,ENST00000518468.1,ENST00000518710.5,ENST00000519912.1,ENST00000521611.1,ENST00000522957.1,ENST00000523594.1	5645.73	5425.62	2089	14.34	12.07	2089	0	14.67	12.97	13.3527	16.0719	0.0319004	11.8118	14.2122	0.0319743	chr8	52622456	52745843	52684149	-	protein_coding	KNOWN	RB1CC1	10	24	-0.287372	Decile 5	Vigintile 10	Expr 60-70%
ENSG00000023318.7	ENST00000262455.6	4854	4633.89	1191	9.57	8.06	1191	0	9.07	8.02	8.56325	9.5887	0.0196388	7.58144	8.48722	0.0196347	chr9	99979179	100099040	100039109	-	protein_coding	KNOWN	ERP44	1	12	-0.4139	Decile 4	Vigintile 8	Expr 50-60%
ENSG00000023330.14	ENST00000310271.6,ENST00000394965.6,ENST00000459884.1,ENST00000469224.5,ENST00000484952.5,ENST00000493402.1	1943.52	1723.41	2094	45.26	38.1	2094	0	43.41	38.38	40.4179	46.4168	0.0235229	35.7952	41.0943	0.0235642	chr3	52198086	52214327	52206206	+	protein_coding	KNOWN	ALAS1	6	12	1.09806	Decile 10	Vigintile 20	Expr 80-90%
ENSG00000023445.13	ENST00000263464.7,ENST00000526421.5,ENST00000527309.1,ENST00000527336.1,ENST00000528940.1,ENST00000532808.5,ENST00000615299.4	4580.13	4360.01	4	0.03	0.03	4	0	0.42	0.37	0.115579	0.78811	0.293324	0.101615	0.696531	0.293274	chr11	102317450	102339403	102328426	+	protein_coding	KNOWN	BIRC3	7	10	-0.472177	Decile 4	Vigintile 7	Expr 0-10%
ENSG00000023516.8	ENST00000025301.3	9920	9699.89	1261	4.84	4.08	1261	0	4.59	4.06	4.33046	4.84136	0.0190059	3.84029	4.29215	0.0189347	chr13	42272153	42323267	42297710	+	protein_coding	KNOWN	AKAP11	1	13	-0.339889	Decile 5	Vigintile 9	Expr 40-50%
ENSG00000023572.8	ENST00000367439.7,ENST00000367440.3,ENST00000472197.1	704.86	484.77	74	5.69	4.79	74	0	5.5	4.86	4.2819	6.73403	0.0775626	3.80352	5.97376	0.0775308	chr1	193096468	193106114	193101291	-	protein_coding	KNOWN	GLRX2	3	4	-0.659326	Decile 2	Vigintile 3	Expr 40-50%
ENSG00000023608.4	ENST00000216294.4	2656	2435.89	369	5.64	4.75	366.5	2.68	5.32	4.7	4.76926	5.8659	0.0352657	4.21326	5.18323	0.0352934	chr14	61762357	61796428	61779392	+	protein_coding	KNOWN	SNAPC1	1	10	-0.062908	Decile 7	Vigintile 13	Expr 40-50%
ENSG00000023697.12	ENST00000428559.6,ENST00000524480.5,ENST00000526521.5,ENST00000526530.1,ENST00000528821.5,ENST00000530274.5,ENST00000531803.5,ENST00000532573.1,ENST00000532964.5,ENST00000533447.5	1514.94	1294.82	448	12.89	10.85	448	0	13.87	12.26	12.0634	15.7454	0.0460574	10.6614	13.9228	0.0460054	chr12	15911172	16037282	15974227	+	protein_coding	KNOWN	DERA	10	9	-0.325368	Decile 5	Vigintile 9	Expr 50-60%
ENSG00000023734.10	ENST00000025399.10,ENST00000419869.6,ENST00000536737.1,ENST00000538718.1,ENST00000539887.1,ENST00000541731.1	1847.4	1627.28	5307	121.49	102.26	5307	0	115.56	102.18	112.353	118.786	0.00956862	99.332	104.999	0.00953412	chr12	15882391	15903478	15892934	+	protein_coding	KNOWN	STRAP	6	11	-0.083913	Decile 7	Vigintile 13	Expr 94-95%
ENSG00000023839.10	ENST00000370434.1,ENST00000370449.8,ENST00000496621.1	5312	5091.89	29	0.21	0.18	29	0	0.35	0.31	0.168159	0.603188	0.209775	0.149747	0.534783	0.209623	chr10	99782732	99852192	99817462	+	protein_coding	KNOWN	ABCC2	3	32	0.280568	Decile 9	Vigintile 17	Expr 10-20%
ENSG00000023892.10	ENST00000316637.6,ENST00000444278.2,ENST00000468102.1	2170.54	1950.44	168	3.21	2.7	168	0	3.58	3.16	2.76751	4.54602	0.0834912	2.44399	4.01844	0.0834716	chr6	35297852	35321771	35309811	+	protein_coding	KNOWN	DEF6	3	11	1.0014	Decile 10	Vigintile 19	Expr 30-40%
ENSG00000023902.13	ENST00000369124.4,ENST00000369126.5,ENST00000441340.1,ENST00000477309.1,ENST00000479194.5,ENST00000485470.1,ENST00000492304.1,ENST00000502767.1,ENST00000607609.2	1931.47	1711.35	1021	22.23	18.71	1021	0	21.91	19.37	20.2277	23.6318	0.0265085	17.8853	20.8944	0.0265244	chr1	150149183	150164720	150156951	+	protein_coding	KNOWN	PLEKHO1	9	6	0.736779	Decile 10	Vigintile 19	Expr 70-80%
ENSG00000023909.9	ENST00000370238.7,ENST00000462183.1,ENST00000467772.1,ENST00000615724.1	1873.31	1653.23	271	6.11	5.14	271	0	5.96	5.27	4.59425	7.43826	0.0819003	4.06676	6.58145	0.0819789	chr1	93885205	93909456	93897330	-	protein_coding	KNOWN	GCLM	4	7	-0.202605	Decile 6	Vigintile 11	Expr 40-50%
ENSG00000024048.10	ENST00000372899.5,ENST00000372901.1,ENST00000372903.6	7778.04	7557.93	1370	6.75	5.68	1370	0	6.44	5.69	6.08336	6.80007	0.0190328	5.38192	6.01449	0.0189847	chr6	42564062	42693504	42628783	+	protein_coding	KNOWN	UBR2	3	47	0.370816	Decile 9	Vigintile 17	Expr 40-50%
ENSG00000024422.11	ENST00000263277.7,ENST00000538399.1,ENST00000540884.1,ENST00000596225.5,ENST00000602215.1	3528.14	3308.02	853	9.61	8.09	853	0	11.65	10.3	8.97053	15.8864	0.10046	7.91923	14.0342	0.100529	chr19	47713343	47743134	47728238	+	protein_coding	KNOWN	EHD2	5	6	1.52682	Decile 10	Vigintile 20	Expr 50-60%
ENSG00000024526.16	ENST00000370966.9,ENST00000456315.6,ENST00000488146.5,ENST00000489862.1,ENST00000525124.1	4003.23	3783.13	664	6.54	5.5	664	0	6.39	5.65	5.4021	7.43497	0.0552878	4.77103	6.56813	0.0552286	chr1	68474152	68497221	68485686	-	protein_coding	KNOWN	DEPDC1	5	13	-0.611167	Decile 2	Vigintile 4	Expr 40-50%
ENSG00000024862.16	ENST00000332797.10,ENST00000610978.1,ENST00000611852.4,ENST00000617445.4	1244.08	1023.96	221	8.04	6.77	221	0	7.69	6.8	6.68636	8.69956	0.0452812	5.90619	7.68763	0.0451982	chr6	138773509	138793319	138783414	+	protein_coding	KNOWN	CCDC28A	4	7	-0.407678	Decile 4	Vigintile 8	Expr 40-50%
ENSG00000025039.14	ENST00000359203.3,ENST00000369415.8,ENST00000492783.1	2744.13	2524.02	587	8.66	7.29	587	0	8.33	7.37	7.10775	9.6646	0.0528167	6.28234	8.5423	0.0527931	chr6	89364636	89412270	89388453	-	protein_coding	KNOWN	RRAGD	3	7	0.036407	Decile 7	Vigintile 14	Expr 50-60%
ENSG00000025156.12	ENST00000368455.8,ENST00000452194.5,ENST00000465214.2	1899.08	1678.98	463	10.27	8.65	463	0.07	9.83	8.69	8.07574	11.6358	0.0622442	7.17548	10.3263	0.0622819	chr6	122399546	122433119	122416332	+	protein_coding	KNOWN	HSF2	3	13	-0.745785	Decile 1	Vigintile 2	Expr 50-60%
ENSG00000025293.15	ENST00000339089.10,ENST00000374000.8,ENST00000374012.7,ENST00000420233.1,ENST00000439301.5,ENST00000449988.1,ENST00000452270.5,ENST00000461122.5,ENST00000461405.1,ENST00000473943.1,ENST00000480940.1,ENST00000481202.5,ENST00000485604.1,ENST00000486408.5,ENST00000495338.5,ENST00000496305.5,ENST00000617560.1	3860.74	3640.65	2846	29.12	24.51	2846	0	30.45	26.92	27.1548	34.1522	0.0396269	23.8961	30.081	0.039722	chr20	35771974	35950381	35861177	+	protein_coding	KNOWN	PHF20	17	18	0.649531	Decile 9	Vigintile 18	Expr 70-80%
ENSG00000025423.11	ENST00000322165.1,ENST00000553476.1,ENST00000554150.5,ENST00000554155.1,ENST00000554643.5,ENST00000555159.5,ENST00000555805.5,ENST00000556481.5,ENST00000556650.5,ENST00000556875.5	1265.6	1045.54	85.03	3.03	2.55	85.03	0.16	3.83	3.39	2.61344	5.21514	0.11447	2.31987	4.6214	0.114543	chr12	56752161	56787790	56769975	+	protein_coding	KNOWN	HSD17B6	10	6	1.14755	Decile 10	Vigintile 20	Expr 30-40%
ENSG00000025434.18	ENST00000395397.7,ENST00000405576.5,ENST00000405853.7,ENST00000407404.5,ENST00000412937.5,ENST00000419652.5,ENST00000420369.5,ENST00000436029.5,ENST00000436778.5,ENST00000437276.1,ENST00000441012.6,ENST00000444396.5,ENST00000449369.5,ENST00000457932.5,ENST00000461778.5,ENST00000462051.5,ENST00000467728.5,ENST00000473222.1,ENST00000476086.6,ENST00000481020.5,ENST00000481889.6,ENST00000483882.1,ENS…	950.11	730.04	419.02	21.38	18	419.05	0.21	23.25	20.55	20.3405	26.3322	0.0442744	17.8988	23.1974	0.0442452	chr11	47248300	47269032	47258666	+	protein_coding	KNOWN	NR1H3	35	10	1.26629	Decile 10	Vigintile 20	Expr 60-70%
ENSG00000025708.13	ENST00000252029.7,ENST00000395678.7,ENST00000395680.5,ENST00000395681.5,ENST00000425169.1,ENST00000476284.1,ENST00000487162.1,ENST00000487577.5	1829.8	1609.68	14	0.32	0.27	14	0	0.51	0.45	0.303788	0.724454	0.144987	0.27038	0.642498	0.145059	chr22	50525752	50530056	50527904	-	protein_coding	KNOWN	TYMP	8	10	1.44362	Decile 10	Vigintile 20	Expr 10-20%
ENSG00000025770.18	ENST00000299821.15,ENST00000395698.7,ENST00000395701.7,ENST00000418794.1,ENST00000420993.6,ENST00000518394.5,ENST00000520297.5,ENST00000522048.1,ENST00000522304.1,ENST00000523045.5	1708.83	1488.73	1876	46.94	39.51	1876	0	45.7	40.41	42.0712	49.2979	0.0279129	37.2516	43.6377	0.0278583	chr22	50508216	50523472	50515844	+	protein_coding	KNOWN	NCAPH2	10	20	1.4746	Decile 10	Vigintile 20	Expr 80-90%
ENSG00000025772.7	ENST00000372813.3	2062	1841.89	1393	28.17	23.71	1393	0	26.68	23.59	25.291	28.0898	0.0180374	22.3453	24.8169	0.0179915	chr20	44942130	44960486	44951308	-	protein_coding	KNOWN	TOMM34	1	7	0.756549	Decile 10	Vigintile 19	Expr 70-80%
ENSG00000025796.13	ENST00000369002.8,ENST00000429168.1,ENST00000446496.1,ENST00000459782.1,ENST00000460009.1,ENST00000465210.1,ENST00000466419.1,ENST00000473746.1,ENST00000484803.5,ENST00000489455.1	5218.89	4998.79	3184.51	23.73	19.97	3184.71	2.47	24.31	21.5	22.0407	26.8105	0.0332011	19.5102	23.7267	0.033179	chr6	107867756	107958189	107912972	-	protein_coding	KNOWN	SEC63	10	21	-0.105767	Decile 7	Vigintile 13	Expr 70-80%
ENSG00000025800.13	ENST00000373625.7,ENST00000446515.1,ENST00000469790.1,ENST00000471599.5	7366.41	7146.29	4558.73	23.76	20	4556.31	4.15	22.79	20.15	22.0352	23.5533	0.0114037	19.5116	20.8522	0.0113916	chr1	32108038	32176568	32142303	+	protein_coding	KNOWN	KPNA6	4	14	0.949278	Decile 10	Vigintile 19	Expr 70-80%
ENSG00000026025.13	ENST00000224237.9,ENST00000421459.2,ENST00000469543.5,ENST00000478317.5,ENST00000478746.1,ENST00000485947.1,ENST00000487938.5,ENST00000495528.1,ENST00000497849.1,ENST00000544301.5	1864.71	1644.6	15494.8	350.99	295.41	15493.7	1.61	332.62	294.1	327.244	337.944	0.00550895	289.476	298.817	0.00542672	chr10	17228259	17237593	17232926	+	protein_coding	KNOWN	VIM	10	10	-0.194191	Decile 6	Vigintile 12	Expr 98-99%
ENSG00000026036.21	ENST00000480273.5,ENST00000482936.5,ENST00000492259.6,ENST00000496281.1	5608.52	5388.41	609.93	4.22	3.55	613.61	26.2	4.05	3.58	3.57991	4.53764	0.0403125	3.16106	4.00791	0.040375	chr20	63659300	63698684	63678992	+	protein_coding	KNOWN	RTEL1-TNFRSF6B	4	37	1.91604	Decile 10	Vigintile 20	Expr 30-40%
ENSG00000026103.19	ENST00000313771.9,ENST00000352159.8,ENST00000355279.2,ENST00000355740.6,ENST00000357339.6,ENST00000371857.7,ENST00000460510.5,ENST00000466081.5,ENST00000477270.5,ENST00000479522.5,ENST00000484444.5,ENST00000487314.1,ENST00000488877.5,ENST00000492756.5,ENST00000494410.5,ENST00000494799.5,ENST00000612663.4,ENST00000615406.4,ENST00000626542.2	1401.41	1181.29	230.89	7.28	6.13	231.06	1.01	8.06	7.12	6.85813	9.28467	0.0517149	6.07563	8.221	0.0516393	chr10	88990531	89015785	89003158	+	protein_coding	KNOWN	FAS	19	10	-0.368342	Decile 5	Vigintile 9	Expr 40-50%
ENSG00000026297.15	ENST00000028008.9,ENST00000358165.7,ENST00000366855.10,ENST00000421787.5,ENST00000467705.6,ENST00000476238.6,ENST00000478180.6,ENST00000496851.6,ENST00000499370.6,ENST00000508775.5,ENST00000509073.1,ENST00000510083.1,ENST00000611959.1,ENST00000620173.4	1221.99	1001.89	365.38	13.59	11.43	364.81	1.36	13.48	11.92	11.4325	15.6287	0.0545644	10.1258	13.8371	0.0545804	chr6	166929504	166957191	166943347	-	protein_coding	KNOWN	RNASET2	14	14	0.02261	Decile 7	Vigintile 14	Expr 50-60%
ENSG00000026508.16	ENST00000263398.10,ENST00000278385.10,ENST00000278386.10,ENST00000279452.10,ENST00000352818.8,ENST00000415148.6,ENST00000425428.6,ENST00000428726.6,ENST00000433892.6,ENST00000434472.6,ENST00000442151.6,ENST00000524922.1,ENST00000525209.5,ENST00000525211.5,ENST00000525241.1,ENST00000525293.5,ENST00000525348.1,ENST00000525469.1,ENST00000525685.5,ENST00000525688.5,ENST00000526000.5,ENST00000526025.1…	1275.86	1055.78	286	10.09	8.49	286	0	12.72	11.25	10.1658	15.346	0.0708708	9.00712	13.5928	0.0708117	chr11	35138870	35232402	35185636	+	protein_coding	KNOWN	CD44	38	18	-0.112991	Decile 7	Vigintile 13	Expr 50-60%
ENSG00000026559.13	ENST00000371571.4,ENST00000424171.5,ENST00000433903.5,ENST00000439216.5,ENST00000447736.1,ENST00000506387.1	1749.58	1529.47	490	11.94	10.05	489.77	0.5	11.59	10.25	10.3516	12.873	0.037599	9.14221	11.3718	0.0375749	chr20	51003656	51023129	51013392	-	protein_coding	KNOWN	KCNG1	6	4	0.383291	Decile 9	Vigintile 17	Expr 50-60%
ENSG00000026652.13	ENST00000320285.8,ENST00000366905.3,ENST00000366911.9,ENST00000436279.1,ENST00000437165.1	4990.46	4770.35	1550	12.1	10.19	1550	0	11.77	10.4	10.3473	13.2102	0.0419027	9.16565	11.6975	0.0418956	chr6	161129979	161274061	161202020	-	protein_coding	KNOWN	AGPAT4	5	9	-0.113587	Decile 7	Vigintile 13	Expr 50-60%
ENSG00000026751.16	ENST00000359331.8,ENST00000368042.7,ENST00000368043.7,ENST00000441662.6,ENST00000444090.6,ENST00000458104.6,ENST00000458602.6,ENST00000484221.1,ENST00000488819.1,ENST00000495334.1,ENST00000621377.4	2243.55	2023.44	0	0	0	0	0	0.32	0.29	0.101854	0.617641	0.283429	0.0867825	0.543115	0.283513	chr1	160739057	160754821	160746939	+	protein_coding	KNOWN	SLAMF7	11	7	0.351319	Decile 9	Vigintile 17	Non-expressed
ENSG00000026950.16	ENST00000082468.11,ENST00000289361.10,ENST00000414912.2,ENST00000425234.6,ENST00000427334.5,ENST00000450085.6,ENST00000465690.6,ENST00000476549.6,ENST00000502361.1,ENST00000506698.1,ENST00000513047.5	2803.82	2583.71	253.73	3.66	3.08	253.3	1.7	4.16	3.68	3.44718	4.91237	0.0605386	3.05288	4.34759	0.0605471	chr6	26402237	26415216	26408726	+	protein_coding	KNOWN	BTN3A1	11	10	0.455769	Decile 9	Vigintile 18	Expr 30-40%
ENSG00000027001.9	ENST00000382172.3,ENST00000433710.2,ENST00000464194.3,ENST00000469167.1,ENST00000494139.1	1214.88	994.83	722	27.04	22.76	722	0	25.88	22.89	22.6132	29.1723	0.0435209	20.0088	25.8099	0.0434689	chr13	23730189	23889419	23809804	-	protein_coding	KNOWN	MIPEP	5	19	-0.249917	Decile 6	Vigintile 11	Expr 70-80%
ENSG00000027075.13	ENST00000332981.9,ENST00000536400.5,ENST00000552875.2,ENST00000553265.5,ENST00000553726.5,ENST00000553830.1,ENST00000553831.5,ENST00000553846.1,ENST00000553889.5,ENST00000554835.1,ENST00000555082.5,ENST00000555110.1,ENST00000555185.5,ENST00000555233.5,ENST00000555382.5,ENST00000555542.5,ENST00000555604.1,ENST00000555628.5,ENST00000555906.5,ENST00000556164.5,ENST00000556245.1,ENST00000556778.5,ENS…	3238.54	3018.43	245	3.02	2.55	245.25	1.3	8.08	7.14	5.92497	10.4459	0.0948941	5.24562	9.24604	0.0948924	chr14	61187559	61550976	61369267	+	protein_coding	KNOWN	PRKCH	27	14	-0.132792	Decile 6	Vigintile 12	Expr 30-40%
ENSG00000027644.4	ENST00000368195.3	5101	4880.89	3	0.02	0.02	3	0	0.03	0.03	0.00527145	0.0577763	0.334765	0.00466045	0.0511046	0.334661	chr1	156840063	156859018	156849540	-	protein_coding	KNOWN	INSRR	1	22	0.964402	Decile 10	Vigintile 19	Expr 0-10%
ENSG00000027697.12	ENST00000367739.8,ENST00000414770.5,ENST00000458076.5,ENST00000478333.1,ENST00000543628.5	1915.82	1695.7	661	14.52	12.22	661	0	14.17	12.53	12.5734	15.7193	0.0390147	11.1497	13.9328	0.0389071	chr6	137197484	137219449	137208466	-	protein_coding	KNOWN	IFNGR1	5	8	-0.527584	Decile 3	Vigintile 6	Expr 60-70%
ENSG00000027847.13	ENST00000029410.9,ENST00000502420.1,ENST00000505145.1,ENST00000505433.5,ENST00000505468.1,ENST00000507061.1,ENST00000510761.1,ENST00000515353.1	1616.62	1396.52	462	12.32	10.37	462	0	12.3	10.87	10.8961	13.7453	0.0398761	9.62847	12.1498	0.0398547	chr5	177600100	177610347	177605223	+	protein_coding	KNOWN	B4GALT7	8	6	0.991186	Decile 10	Vigintile 19	Expr 50-60%
ENSG00000027869.11	ENST00000368198.7,ENST00000368199.7,ENST00000392306.2,ENST00000468744.5,ENST00000486350.1,ENST00000495306.1	1006.94	786.84	73	3.46	2.91	73	0	3.5	3.09	2.61091	4.40382	0.0891026	2.33097	3.91644	0.0890609	chr1	156806243	156816862	156811552	-	protein_coding	KNOWN	SH2D2A	6	9	0.849164	Decile 10	Vigintile 19	Expr 30-40%
ENSG00000028116.16	ENST00000340157.8,ENST00000412104.6,ENST00000417641.6,ENST00000428021.1,ENST00000432057.2,ENST00000435505.6,ENST00000440705.6,ENST00000463222.1,ENST00000478687.5	1716.13	1496.02	457.11	11.38	9.58	457.49	7.51	11.19	9.89	9.95835	12.4692	0.0385325	8.79315	11.0114	0.0385364	chr2	57907651	58159920	58033785	+	protein_coding	KNOWN	VRK2	9	16	-0.525056	Decile 3	Vigintile 6	Expr 50-60%
ENSG00000028137.16	ENST00000376259.6,ENST00000489921.1,ENST00000492361.1,ENST00000536782.2	3618.1	3397.99	89	0.98	0.82	89	0	1.35	1.2	0.857584	1.94762	0.13962	0.760553	1.72465	0.139604	chr1	12167003	12209228	12188115	+	protein_coding	KNOWN	TNFRSF1B	4	10	0.956566	Decile 10	Vigintile 19	Expr 20-30%
ENSG00000028203.17	ENST00000261219.7,ENST00000356859.8,ENST00000397792.8,ENST00000436874.5,ENST00000546365.5,ENST00000546398.5,ENST00000546409.5,ENST00000546445.5,ENST00000546557.5,ENST00000546951.1,ENST00000547484.5,ENST00000547611.5,ENST00000547894.5,ENST00000547997.5,ENST00000548245.5,ENST00000548371.5,ENST00000548455.5,ENST00000548822.5,ENST00000548838.5,ENST00000549002.5,ENST00000549192.5,ENST00000549589.5,ENS…	2028.24	1808.15	1306	26.91	22.65	1306	0	29.53	26.11	26.4643	32.6969	0.0364863	23.4321	28.9363	0.0364409	chr12	95217746	95302790	95260268	+	protein_coding	KNOWN	VEZT	41	16	-0.025948	Decile 7	Vigintile 14	Expr 70-80%
ENSG00000028277.20	ENST00000342301.8,ENST00000389341.9,ENST00000524801.6,ENST00000526816.6,ENST00000526831.1,ENST00000528894.8,ENST00000529067.5,ENST00000529952.5,ENST00000530982.7,ENST00000531773.5,ENST00000532176.2,ENST00000533548.1,ENST00000534559.5,ENST00000558596.3,ENST00000560398.5,ENST00000560558.5,ENST00000560804.6,ENST00000598842.2,ENST00000625670.2	3111.93	2891.83	423	5.45	4.59	423	0	13.96	12.35	5.34493	29.4413	0.329189	4.72103	26.0482	0.329039	chr19	42086110	42196585	42141347	-	protein_coding	KNOWN	POU2F2	19	16	1.31593	Decile 10	Vigintile 20	Expr 40-50%
ENSG00000028310.17	ENST00000466684.5,ENST00000467963.5,ENST00000475706.5,ENST00000483173.5,ENST00000483234.5,ENST00000487688.1,ENST00000489093.1,ENST00000489816.5,ENST00000490814.6,ENST00000493082.5,ENST00000494422.1,ENST00000495265.5,ENST00000495794.5,ENST00000497410.5,ENST00000518250.5,ENST00000518251.1,ENST00000519112.5,ENST00000519838.5,ENST00000523139.5	2685.88	2465.77	1899	28.69	24.15	1898.99	0.1	30.06	26.58	27.2442	33.3926	0.0356539	24.0908	29.5279	0.0356758	chr5	850291	892824	871557	-	protein_coding	KNOWN	BRD9	19	19	1.52819	Decile 10	Vigintile 20	Expr 70-80%
ENSG00000028528.14	ENST00000261889.9,ENST00000380285.7,ENST00000558040.5,ENST00000559061.5,ENST00000559339.1,ENST00000559389.1,ENST00000559401.1,ENST00000559844.5,ENST00000559961.1,ENST00000560260.5,ENST00000560829.5,ENST00000560861.1,ENST00000561026.5,ENST00000625244.2	2683.82	2463.71	2069	31.29	26.33	2069	0	31.91	28.21	29.1361	35.1651	0.0313748	25.784	31.1158	0.0313446	chr15	64094123	64146090	64120106	+	protein_coding	KNOWN	SNX1	14	15	0.304275	Decile 9	Vigintile 17	Expr 70-80%
ENSG00000028839.9	ENST00000237264.8,ENST00000367869.1,ENST00000367871.5,ENST00000416965.5,ENST00000457715.1,ENST00000477527.1,ENST00000481694.1,ENST00000613034.4	920.4	700.31	858.83	45.69	38.45	859.02	4.55	44.1	38.99	40.5605	47.8189	0.0285766	35.8817	42.2967	0.0285439	chr6	133952170	133990432	133971301	+	protein_coding	KNOWN	TBPL1	8	7	-0.227869	Decile 6	Vigintile 11	Expr 80-90%
ENSG00000029153.14	ENST00000261178.9,ENST00000266503.9,ENST00000311001.9,ENST00000395901.6,ENST00000457040.6,ENST00000539558.1,ENST00000542388.1,ENST00000544915.5,ENST00000546179.5	3442.67	3222.6	604	6.98	5.88	604	0	7.17	6.34	5.77911	8.80013	0.0711418	5.11937	7.79033	0.0712262	chr12	27332854	27425289	27379071	+	protein_coding	KNOWN	ARNTL2	9	17	-0.363074	Decile 5	Vigintile 9	Expr 40-50%
ENSG00000029363.15	ENST00000353331.8,ENST00000392348.6,ENST00000476194.1,ENST00000526228.1,ENST00000527536.5,ENST00000527613.5,ENST00000527759.5,ENST00000528229.1,ENST00000529522.5,ENST00000529826.5,ENST00000529917.5,ENST00000530429.5,ENST00000530767.5,ENST00000531224.5,ENST00000532076.1,ENST00000532384.5,ENST00000533422.5,ENST00000533621.1,ENST00000534269.5,ENST00000534321.1,ENST00000534762.5,ENST00000534792.5,ENS…	2580.07	2359.97	5526.37	87.24	73.42	5525.73	5.4	83.69	74	78.7773	88.6141	0.0208256	69.6893	78.3902	0.0207919	chr6	136256863	136289851	136273357	-	protein_coding	KNOWN	BCLAF1	23	15	-0.267371	Decile 5	Vigintile 10	Expr 91-92%
ENSG00000029364.11	ENST00000031146.8,ENST00000336643.9,ENST00000538956.5,ENST00000554023.1,ENST00000554059.1,ENST00000555245.5,ENST00000555840.5,ENST00000556125.5,ENST00000556605.5,ENST00000557046.1,ENST00000628474.2	3029.62	2809.51	1512	20.05	16.87	1512	0	19.46	17.21	17.9224	20.9851	0.0268317	15.876	18.5798	0.0267073	chr14	69398015	69462388	69430201	+	protein_coding	KNOWN	SLC39A9	11	8	0.090865	Decile 8	Vigintile 15	Expr 60-70%
ENSG00000029534.19	ENST00000265709.12,ENST00000289734.11,ENST00000314214.12,ENST00000335651.6,ENST00000347528.8,ENST00000348036.8,ENST00000518061.1,ENST00000518715.1,ENST00000520299.5,ENST00000521407.1,ENST00000522231.5,ENST00000522543.5,ENST00000524069.1,ENST00000524227.5	5164.61	4944.5	691	5.21	4.38	689.49	1.11	5.86	5.18	4.57293	7.16372	0.0788784	4.04954	6.34251	0.0788567	chr8	41653220	41896762	41774991	-	protein_coding	KNOWN	ANK1	14	43	0.467369	Decile 9	Vigintile 18	Expr 40-50%
ENSG00000029559.6	ENST00000226284.6	1546	1325.89	2	0.06	0.05	2	0	0.08	0.07	0.00838582	0.170594	0.388105	0.00732686	0.150861	0.388059	chr4	87799581	87812435	87806008	+	protein_coding	KNOWN	IBSP	1	7	-0.526405	Decile 3	Vigintile 6	Expr 0-10%
ENSG00000029639.10	ENST00000367166.4,ENST00000466349.1,ENST00000468889.5,ENST00000470239.1,ENST00000475849.1,ENST00000480390.1,ENST00000487586.5,ENST00000489874.5,ENST00000495806.1	1256.52	1036.43	722	25.95	21.84	722	0	25.63	22.66	23.4005	27.9794	0.0308996	20.6465	24.6962	0.0308544	chr6	155257509	155314493	155286001	-	protein_coding	KNOWN	TFB1M	9	7	-0.28686	Decile 5	Vigintile 10	Expr 70-80%
ENSG00000029725.16	ENST00000341923.10,ENST00000537505.5,ENST00000570487.1,ENST00000572250.1,ENST00000574568.1,ENST00000575475.2,ENST00000575991.1	4286.66	4066.55	2159.47	19.78	16.65	2159.14	1.55	19.36	17.12	17.9484	20.7401	0.0246601	15.8754	18.343	0.0246287	chr17	5282265	5385812	5334038	+	protein_coding	KNOWN	RABEP1	7	18	0.81716	Decile 10	Vigintile 19	Expr 60-70%
ENSG00000029993.14	ENST00000325307.11,ENST00000419110.5,ENST00000430118.1,ENST00000448905.6,ENST00000455596.5	2424.28	2204.18	7927	133.98	112.76	7927	0	126.88	112.19	119.772	134.228	0.0198661	105.969	118.724	0.0198846	chrX	150980509	150990775	150985642	+	protein_coding	KNOWN	HMGB3	5	5	0.700172	Decile 10	Vigintile 19	Expr 95-96%
ENSG00000030066.13	ENST00000378460.6,ENST00000526569.1,ENST00000526870.1,ENST00000527126.1,ENST00000527750.1,ENST00000528071.5,ENST00000528501.5,ENST00000529863.1,ENST00000530326.5,ENST00000531016.1,ENST00000532773.1	5073.22	4853.11	6628	50.88	42.82	6628	0	49.3	43.59	47.5203	51.1394	0.0126877	42.0442	45.2319	0.0126169	chr11	47778087	47848555	47813321	-	protein_coding	KNOWN	NUP160	11	36	0.699953	Decile 10	Vigintile 19	Expr 80-90%
ENSG00000030110.12	ENST00000360661.9,ENST00000374467.3,ENST00000442998.6	2135.96	1915.85	1426.4	27.74	23.34	1426.31	0.83	26.29	23.25	24.9349	27.6621	0.0178605	22.0473	24.4554	0.01785	chr6	33572547	33580293	33576420	-	protein_coding	KNOWN	BAK1	3	7	1.53482	Decile 10	Vigintile 20	Expr 70-80%
ENSG00000030304.13	ENST00000189978.10,ENST00000374438.1,ENST00000374439.1,ENST00000374440.7,ENST00000374448.8,ENST00000416899.7,ENST00000634612.1	1873	1652.92	0	0	0	0	0	0.37	0.32	0.0670011	0.769096	0.358377	0.0594418	0.680595	0.35838	chr9	110668771	110801620	110735195	+	protein_coding	KNOWN	MUSK	7	15	-0.429263	Decile 4	Vigintile 8	Non-expressed
ENSG00000030419.16	ENST00000342002.6,ENST00000374319.8,ENST00000374326.7,ENST00000412444.5,ENST00000431520.5,ENST00000433134.5,ENST00000434687.5,ENST00000439848.5,ENST00000442445.1,ENST00000451136.6,ENST00000452786.2,ENST00000453575.5,ENST00000457361.5,ENST00000484040.1	2670.96	2450.86	92	1.4	1.18	92	0	1.84	1.62	1.26668	2.49593	0.116389	1.12042	2.20771	0.116335	chr2	212999691	213152427	213076059	-	protein_coding	KNOWN	IKZF2	14	9	-0.635198	Decile 2	Vigintile 4	Expr 20-30%
ENSG00000030582.16	ENST00000053867.7,ENST00000585348.1,ENST00000585512.5,ENST00000586242.1,ENST00000586443.1,ENST00000586782.5,ENST00000587109.5,ENST00000587387.5,ENST00000587518.5,ENST00000587958.1,ENST00000588143.5,ENST00000588170.5,ENST00000588237.5,ENST00000589265.5,ENST00000589536.5,ENST00000589923.1,ENST00000590984.1,ENST00000591740.5,ENST00000592323.5,ENST00000592783.5,ENST00000593167.5	1790.17	1570.07	5128	121.67	102.41	5128	0	119.36	105.54	113.582	125.203	0.0168832	100.449	110.708	0.0168676	chr17	44345086	44353102	44349094	+	protein_coding	KNOWN	GRN	21	13	1.59143	Decile 10	Vigintile 20	Expr 94-95%
ENSG00000031003.10	ENST00000033079.7,ENST00000420893.6,ENST00000425075.6,ENST00000502471.5,ENST00000505281.1,ENST00000505961.1,ENST00000508403.5,ENST00000509596.5,ENST00000510804.1,ENST00000513640.1,ENST00000514310.5	4508.12	4288.02	608.15	5.28	4.45	607.96	0.81	6.01	5.31	5.17276	6.90426	0.0496102	4.57451	6.10569	0.0495743	chr5	137937960	138051961	137994960	-	protein_coding	KNOWN	FAM13B	11	23	0.212258	Decile 8	Vigintile 16	Expr 40-50%
ENSG00000031081.10	ENST00000264245.8,ENST00000482743.1	9317	9096.89	383	1.57	1.32	383	0	1.72	1.52	1.3803	2.18553	0.0782629	1.22192	1.9346	0.0781401	chr3	119294373	119420714	119357543	+	protein_coding	KNOWN	ARHGAP31	2	12	-0.107506	Decile 7	Vigintile 13	Expr 20-30%
ENSG00000031691.6	ENST00000335783.3	1733	1512.89	237	5.84	4.91	237	0	5.55	4.9	4.84966	6.25815	0.0439783	4.2973	5.5422	0.0439002	chr6	49463378	49493107	49478242	+	protein_coding	KNOWN	CENPQ	1	9	-0.562813	Decile 3	Vigintile 5	Expr 40-50%
ENSG00000031698.12	ENST00000234677.6,ENST00000369923.4,ENST00000468588.1,ENST00000471705.1,ENST00000477544.5,ENST00000482384.1	1774.29	1554.17	4719.76	113.13	95.22	4719.75	0.43	107.36	94.93	104.161	110.492	0.0102004	92.2097	97.78	0.010182	chr1	109213918	109238169	109226043	+	protein_coding	KNOWN	SARS	6	12	0.636969	Decile 9	Vigintile 18	Expr 94-95%
ENSG00000031823.14	ENST00000034275.12,ENST00000340578.10,ENST00000439268.6,ENST00000585339.5,ENST00000586117.5,ENST00000586344.5,ENST00000587159.5,ENST00000587263.5,ENST00000587411.5,ENST00000587463.5,ENST00000587479.2,ENST00000587799.1,ENST00000587956.5,ENST00000588010.5,ENST00000588879.5,ENST00000589353.5,ENST00000589886.5,ENST00000590623.5,ENST00000590953.5,ENST00000591092.5,ENST00000591124.5,ENST00000591333.5,E…	1658.69	1438.61	2778	71.94	60.55	2778	0	72.62	64.21	65.2391	80.2219	0.0345704	57.6836	70.9283	0.0345524	chr19	5916139	5978142	5947140	-	protein_coding	KNOWN	RANBP3	30	17	1.52723	Decile 10	Vigintile 20	Expr 80-90%
ENSG00000032219.18	ENST00000348476.7,ENST00000355431.7,ENST00000395168.7,ENST00000417477.2,ENST00000424658.5,ENST00000431317.6,ENST00000431612.5,ENST00000445108.5,ENST00000466065.1,ENST00000469635.1,ENST00000553355.1	4301.62	4081.52	521	4.76	4	521	0	5.47	4.83	4.45015	6.61073	0.0671323	3.93189	5.84364	0.0670379	chr14	58298385	58373887	58336136	+	protein_coding	KNOWN	ARID4A	11	24	-0.12571	Decile 6	Vigintile 12	Expr 40-50%
ENSG00000032389.12	ENST00000382125.8,ENST00000398659.8,ENST00000406835.6,ENST00000435721.5,ENST00000441271.1,ENST00000443925.6,ENST00000444776.1,ENST00000455162.5,ENST00000462515.1,ENST00000463662.5,ENST00000470625.1,ENST00000478754.5,ENST00000482570.5,ENST00000496433.5	1597.09	1376.98	862	23.32	19.63	862	0	23.63	20.89	21.6118	25.7916	0.0306651	19.1153	22.8056	0.0306205	chr2	3188925	3377882	3283403	-	protein_coding	KNOWN	TSSC1	14	11	0.229801	Decile 8	Vigintile 16	Expr 70-80%
ENSG00000032444.15	ENST00000221249.10,ENST00000414982.7,ENST00000450331.7,ENST00000545201.6,ENST00000593924.5,ENST00000594098.1,ENST00000594551.1,ENST00000594754.5,ENST00000594864.1,ENST00000595176.5,ENST00000595264.5,ENST00000595352.1,ENST00000595889.1,ENST00000596515.5,ENST00000597202.1,ENST00000598462.1,ENST00000599311.5,ENST00000599947.1,ENST00000599951.1,ENST00000600737.5,ENST00000600942.5,ENST00000601001.5,EN…	2481.19	2261.09	5302	87.36	73.52	5298.8	3.72	85.25	75.38	80.5079	89.9632	0.0191645	71.3083	79.6685	0.0191711	chr19	7534004	7561764	7547884	+	protein_coding	KNOWN	PNPLA6	24	35	1.78603	Decile 10	Vigintile 20	Expr 91-92%
ENSG00000032742.17	ENST00000319980.10,ENST00000351808.9,ENST00000389373.3,ENST00000461115.5,ENST00000470695.1,ENST00000482172.5,ENST00000537103.2	2750.77	2530.66	143	2.11	1.77	143	0	2.46	2.17	1.90412	3.08361	0.080716	1.69289	2.73627	0.0808808	chr13	20567069	20691437	20629253	+	protein_coding	KNOWN	IFT88	7	28	-0.299912	Decile 5	Vigintile 10	Expr 20-30%
ENSG00000033011.11	ENST00000262374.9,ENST00000544428.1,ENST00000586840.1,ENST00000588623.5,ENST00000591783.5,ENST00000591822.5,ENST00000592661.1,ENST00000592793.5	2026.69	1806.58	1314.42	27.1	22.81	1310.6	15.17	26.66	23.58	24.6876	28.6493	0.0253627	21.8568	25.3603	0.0253595	chr16	5033960	5087379	5060669	+	protein_coding	KNOWN	ALG1	8	14	0.960275	Decile 10	Vigintile 19	Expr 70-80%
ENSG00000033030.13	ENST00000536306.5,ENST00000536663.5,ENST00000538116.5,ENST00000538493.1,ENST00000540586.1,ENST00000542892.2,ENST00000543897.5,ENST00000544054.5,ENST00000546149.1,ENST00000633063.1	2863.5	2643.38	1035	14.59	12.28	1035	0	14.35	12.69	13.3252	15.3678	0.0244727	11.7949	13.6003	0.0244791	chr12	122471600	122501073	122486336	-	protein_coding	KNOWN	ZCCHC8	10	14	0.730461	Decile 10	Vigintile 19	Expr 60-70%
ENSG00000033050.7	ENST00000222388.6,ENST00000287844.6,ENST00000441774.1,ENST00000468073.5,ENST00000473874.1,ENST00000477252.1	3005.01	2784.93	2770	37.05	31.19	2770	0	36.74	32.48	33.3661	40.5222	0.0323773	29.5712	35.9052	0.0323911	chr7	151207837	151227230	151217533	-	protein_coding	KNOWN	ABCF2	6	16	1.08298	Decile 10	Vigintile 20	Expr 80-90%
ENSG00000033100.14	ENST00000035307.6,ENST00000465601.1,ENST00000482173.5,ENST00000495645.5	3580.88	3360.77	729	8.08	6.8	729	0	7.88	6.97	7.18703	8.60818	0.0308415	6.36864	7.62577	0.0308091	chr7	151232489	151238827	151235658	+	protein_coding	KNOWN	CHPF2	4	5	1.18829	Decile 10	Vigintile 20	Expr 40-50%
ENSG00000033122.18	ENST00000035383.9,ENST00000310961.9,ENST00000370958.5,ENST00000415775.2,ENST00000441830.1,ENST00000565615.1,ENST00000588515.5,ENST00000607936.5,ENST00000608470.5,ENST00000608744.5,ENST00000608815.5,ENST00000609072.5,ENST00000609498.5	4734.23	4514.12	2	0.02	0.01	2	0	0.74	0.65	0.274489	1.31445	0.253362	0.242609	1.16265	0.253453	chr1	69568398	70151945	69860171	+	protein_coding	KNOWN	LRRC7	13	27	-0.624152	Decile 2	Vigintile 4	Expr 0-10%
ENSG00000033170.16	ENST00000342677.10,ENST00000358307.6,ENST00000360689.9,ENST00000394586.6,ENST00000549235.6,ENST00000553924.5,ENST00000554610.1,ENST00000554667.1,ENST00000554765.1,ENST00000555559.5,ENST00000556292.1,ENST00000556518.5,ENST00000557164.5,ENST00000557338.5,ENST00000557536.5	2303.24	2083.13	705.71	12.62	10.62	705.69	0.52	13.69	12.11	12.1017	15.3873	0.041377	10.7112	13.6176	0.0413165	chr14	65410592	65744121	65577356	+	protein_coding	KNOWN	FUT8	15	11	-0.144033	Decile 6	Vigintile 12	Expr 50-60%
ENSG00000033178.12	ENST00000322244.9,ENST00000420827.2,ENST00000429659.7,ENST00000505673.2,ENST00000506571.1,ENST00000514261.1	2018.31	1798.3	1298	26.89	22.63	1298	0	25.8	22.81	21.2667	30.2895	0.0605081	18.8512	26.8343	0.0605123	chr4	67612652	67701179	67656915	-	protein_coding	KNOWN	UBA6	6	33	-0.614516	Decile 2	Vigintile 4	Expr 70-80%
ENSG00000033327.12	ENST00000340149.6,ENST00000361507.4,ENST00000526030.1,ENST00000528329.1,ENST00000528886.5,ENST00000530915.1,ENST00000534823.1	5964.35	5744.24	868	5.63	4.74	868	0	6.06	5.36	5.34098	6.83242	0.0419139	4.71687	6.03525	0.0418839	chr11	78215297	78418348	78316822	-	protein_coding	KNOWN	GAB2	7	10	-0.049673	Decile 7	Vigintile 13	Expr 40-50%
ENSG00000033627.14	ENST00000264649.10,ENST00000343619.8,ENST00000393829.6,ENST00000537728.5,ENST00000544137.5,ENST00000585525.5,ENST00000585828.5,ENST00000586001.1,ENST00000586201.5,ENST00000586315.1,ENST00000587299.1,ENST00000587375.1,ENST00000587510.5,ENST00000587797.1,ENST00000587824.5,ENST00000587882.5,ENST00000588138.1,ENST00000588629.1,ENST00000588806.1,ENST00000588901.5,ENST00000589213.1,ENST00000589727.5,EN…	2433.98	2213.88	2251	37.88	31.88	2251	0	38.13	33.72	34.5193	41.9412	0.0346302	30.4959	37.0586	0.0346472	chr17	42458844	42522611	42490727	+	protein_coding	KNOWN	ATP6V0A1	25	22	0.971746	Decile 10	Vigintile 19	Expr 80-90%
ENSG00000033800.13	ENST00000249636.10,ENST00000545237.1,ENST00000562190.1,ENST00000563996.1,ENST00000564009.1,ENST00000564915.5,ENST00000567417.1,ENST00000611270.1	2674.18	2454.08	1470.25	22.32	18.78	1467.1	11.15	21.77	19.25	19.4868	24.0869	0.0368858	17.2431	21.3125	0.0368871	chr15	68054179	68198603	68126391	+	protein_coding	KNOWN	PIAS1	8	15	-0.052684	Decile 7	Vigintile 13	Expr 70-80%
ENSG00000033867.16	ENST00000295736.9,ENST00000419036.5,ENST00000425128.6,ENST00000428005.1,ENST00000428179.1,ENST00000428386.5,ENST00000437179.5,ENST00000437266.5,ENST00000438530.5,ENST00000440156.5,ENST00000445684.5,ENST00000446700.5,ENST00000454389.5,ENST00000455077.5,ENST00000457377.5,ENST00000465487.5,ENST00000475120.1,ENST00000491211.1	2875.48	2655.37	1659	23.28	19.59	1659	0	22.69	20.06	20.4778	24.9834	0.0342922	18.1085	22.093	0.034264	chr3	27372721	27484420	27428570	-	protein_coding	KNOWN	SLC4A7	18	28	-0.421619	Decile 4	Vigintile 8	Expr 70-80%
ENSG00000034053.14	ENST00000382938.3,ENST00000411764.5,ENST00000558206.1,ENST00000558259.5,ENST00000558330.5,ENST00000558358.1,ENST00000558402.5,ENST00000558804.5,ENST00000559709.5,ENST00000559814.5,ENST00000560283.5,ENST00000561069.5	3243.93	3023.82	786	9.68	8.15	786	0	9.84	8.7	9.01093	10.7014	0.0294764	7.97379	9.47034	0.0294908	chr15	28884483	29118315	29001399	+	protein_coding	KNOWN	APBA2	12	16	0.424401	Decile 9	Vigintile 17	Expr 50-60%
ENSG00000034152.18	ENST00000316920.10,ENST00000342679.8,ENST00000361818.9,ENST00000395491.6,ENST00000477540.1,ENST00000479129.5,ENST00000483928.6,ENST00000496046.5,ENST00000526076.6,ENST00000527123.1,ENST00000529517.1,ENST00000534743.1,ENST00000583508.1,ENST00000613338.4,ENST00000627447.1	1723.01	1502.91	848	21.02	17.69	848	0	21.08	18.64	18.1857	23.8986	0.0468994	16.117	21.1737	0.0468936	chr17	21284672	21315240	21299956	+	protein_coding	KNOWN	MAP2K3	15	14	0.554367	Decile 9	Vigintile 18	Expr 60-70%
ENSG00000034239.10	ENST00000262103.7,ENST00000433756.1,ENST00000519425.1,ENST00000521002.5,ENST00000521701.5,ENST00000521721.1,ENST00000522254.5,ENST00000523008.5,ENST00000523092.5	2123.16	1903.04	3	0.06	0.05	3	0	0.62	0.55	0.252386	1.05809	0.23183	0.223302	0.936262	0.231978	chr8	48710789	48735311	48723050	-	protein_coding	KNOWN	EFCAB1	9	6	-0.018815	Decile 7	Vigintile 14	Expr 0-10%
ENSG00000034510.5	ENST00000233143.5	496	275.99	7195	971.19	817.41	7195	0	919.1	812.67	897.742	940.336	0.0079439	793.955	831.351	0.00791449	chr2	84905625	84906675	84906150	+	protein_coding	KNOWN	TMSB10	1	3	0.059645	Decile 8	Vigintile 15	Expr 99-100%
ENSG00000034533.11	ENST00000264992.7,ENST00000504725.1,ENST00000504964.1,ENST00000505290.1,ENST00000505545.5,ENST00000507978.5,ENST00000509060.1,ENST00000514044.5	2230.54	2010.44	239.57	4.44	3.74	239.54	0.69	5.2	4.6	4.04838	6.527	0.0789487	3.58716	5.78011	0.0789398	chr3	131013875	131027649	131020762	-	protein_coding	KNOWN	ASTE1	8	7	-0.245647	Decile 6	Vigintile 11	Expr 30-40%
ENSG00000034677.11	ENST00000341084.6,ENST00000432381.2,ENST00000517584.5,ENST00000519342.1,ENST00000519449.5,ENST00000519527.5,ENST00000520071.1,ENST00000520903.1,ENST00000522182.1,ENST00000522369.5,ENST00000523167.1,ENST00000523255.5,ENST00000523481.5,ENST00000523644.1,ENST00000524233.1,ENST00000616528.1	2851.12	2631.03	385	5.45	4.59	385	0	8.02	7.09	5.77629	10.5956	0.102216	5.08774	9.35102	0.102213	chr8	100257059	100410015	100333537	-	protein_coding	KNOWN	RNF19A	16	11	-0.151521	Decile 6	Vigintile 12	Expr 40-50%
ENSG00000034693.14	ENST00000367591.4,ENST00000367592.5,ENST00000585848.1	1501.43	1281.33	273	7.94	6.68	273	0	7.87	6.96	6.59792	9.19481	0.0565493	5.844	8.14015	0.0565695	chr6	143450807	143490010	143470408	+	protein_coding	KNOWN	PEX3	3	12	-0.561882	Decile 3	Vigintile 5	Expr 40-50%
ENSG00000034713.7	ENST00000037243.6,ENST00000563744.1,ENST00000565057.5,ENST00000565985.1,ENST00000568455.1	1016.27	796.16	950	44.45	37.41	950	0	43.16	38.16	40.147	46.2815	0.024643	35.5277	40.9401	0.024609	chr16	75566351	75577881	75572116	+	protein_coding	KNOWN	GABARAPL2	5	4	0.269453	Decile 8	Vigintile 16	Expr 80-90%
ENSG00000034971.14	ENST00000037502.10,ENST00000614688.1	2068.5	1848.39	0	0	0	0	0	0.04	0.03	0.00063187	0.0911167	0.47549	0.000564686	0.0805783	0.475634	chr1	171635417	171652683	171644050	-	protein_coding	KNOWN	MYOC	2	4	0.16825	Decile 8	Vigintile 16	Non-expressed
ENSG00000035115.21	ENST00000356150.9,ENST00000402632.5,ENST00000403657.5,ENST00000403658.5,ENST00000403712.6,ENST00000405430.5,ENST00000415368.5,ENST00000431160.5,ENST00000451005.5,ENST00000454318.1,ENST00000460974.1,ENST00000462719.1,ENST00000463865.5,ENST00000465733.5,ENST00000468321.5,ENST00000471948.5,ENST00000472012.1,ENST00000472861.1,ENST00000473104.5,ENST00000475027.5,ENST00000477707.5,ENST00000479739.6,ENS…	1254.66	1034.58	551.43	19.86	16.71	551.46	0.58	20.8	18.39	17.9514	23.5525	0.0456407	15.8883	20.8399	0.0455582	chr2	217730	266398	242064	-	protein_coding	KNOWN	SH3YL1	29	13	0.102815	Decile 8	Vigintile 15	Expr 60-70%
ENSG00000035141.7	ENST00000037869.7,ENST00000430566.5,ENST00000438759.1,ENST00000450256.1,ENST00000460307.1,ENST00000498665.1	1798.86	1578.75	3392.72	80.06	67.38	3392.6	0.58	76.16	67.34	73.5724	78.9384	0.0120678	65.012	69.7211	0.0120318	chr2	70295975	70302090	70299032	-	protein_coding	KNOWN	FAM136A	6	4	0.37639	Decile 9	Vigintile 17	Expr 91-92%
ENSG00000035403.16	ENST00000211998.8,ENST00000372755.7,ENST00000436396.1,ENST00000461383.1,ENST00000472585.1,ENST00000478896.2,ENST00000623461.3,ENST00000624354.3	5661.04	5440.93	19884.4	136.15	114.59	19884.2	3.16	130.15	115.08	124.513	135.937	0.0156823	110.285	120.372	0.0156813	chr10	73995193	74121363	74058278	+	protein_coding	KNOWN	VCL	8	23	0.470748	Decile 9	Vigintile 18	Expr 95-96%
ENSG00000035499.12	ENST00000265036.9,ENST00000453022.6,ENST00000505017.1,ENST00000509006.1,ENST00000512078.5,ENST00000512452.1	1912.05	1691.94	1659	36.53	30.74	1659	0.03	34.85	30.81	32.8128	36.8478	0.0201742	29.0531	32.6213	0.020181	chr5	60596912	60700190	60648551	-	protein_coding	KNOWN	DEPDC1B	6	11	-0.502794	Decile 3	Vigintile 6	Expr 80-90%
ENSG00000035664.11	ENST00000261891.7,ENST00000457488.5,ENST00000557867.1,ENST00000558064.1,ENST00000558069.5,ENST00000558076.1,ENST00000558482.5,ENST00000559007.5,ENST00000559306.1,ENST00000559731.5,ENST00000559897.1,ENST00000561162.5,ENST00000612884.4	2198.35	1978.24	64	1.21	1.01	64	0	2.2	1.94	1.43131	3.02597	0.1255	1.27202	2.68253	0.125482	chr15	63907036	64072033	63989534	-	protein_coding	KNOWN	DAPK2	13	12	0.36939	Decile 9	Vigintile 17	Expr 20-30%
ENSG00000035681.7	ENST00000038176.7,ENST00000427130.6,ENST00000517612.5,ENST00000518159.5,ENST00000518229.5,ENST00000519166.5,ENST00000519174.1,ENST00000519227.1,ENST00000519858.1,ENST00000519871.1,ENST00000521712.1,ENST00000521972.1,ENST00000522645.5,ENST00000523106.5,ENST00000523177.5,ENST00000523982.5,ENST00000524148.5	3101.2	2881.08	913.63	11.81	9.94	913.66	0.47	13.88	12.27	12.0479	15.8316	0.0476198	10.6719	14.0186	0.0476343	chr8	58583504	58659844	58621674	-	protein_coding	KNOWN	NSMAF	17	31	-0.578102	Decile 3	Vigintile 5	Expr 50-60%
ENSG00000035687.9	ENST00000366535.3,ENST00000462358.1,ENST00000468215.1	2732.49	2512.38	2919	43.28	36.43	2919	0	41.18	36.41	39.6067	42.7803	0.0133292	35.0313	37.8324	0.0132913	chr1	244408494	244452134	244430314	-	protein_coding	KNOWN	ADSS	3	13	-0.023553	Decile 7	Vigintile 14	Expr 80-90%
ENSG00000035720.7	ENST00000265404.6,ENST00000396225.1	1328.5	1108.39	0	0	0	0	0	0.07	0.06	0.00128194	0.158862	0.478932	0.00113476	0.140475	0.478876	chr4	67558728	67607337	67583032	+	protein_coding	KNOWN	STAP1	2	10	-0.559096	Decile 3	Vigintile 5	Non-expressed
ENSG00000035862.12	ENST00000262768.11,ENST00000536189.6,ENST00000585421.5,ENST00000586057.5,ENST00000592761.2	3403.73	3183.62	2370.67	27.74	23.35	2370.22	9.51	26.27	23.23	25.2067	27.3877	0.0143156	22.296	24.2207	0.0142594	chr17	78852977	78925387	78889182	-	protein_coding	KNOWN	TIMP2	5	5	1.17302	Decile 10	Vigintile 20	Expr 70-80%
ENSG00000035928.14	ENST00000349703.6,ENST00000381897.5,ENST00000418436.5,ENST00000502706.1,ENST00000502991.5,ENST00000503784.1,ENST00000504554.1,ENST00000504849.5,ENST00000504974.1,ENST00000505077.1,ENST00000509084.1,ENST00000510783.5,ENST00000512275.5,ENST00000512726.1,ENST00000512881.5,ENST00000514572.1	3488.54	3268.43	3195	36.42	30.65	3195	0	36.46	32.24	33.2635	39.7616	0.0309033	29.3856	35.1269	0.0308207	chr4	39287456	39366375	39326915	-	protein_coding	KNOWN	RFC1	16	25	-0.039787	Decile 7	Vigintile 14	Expr 80-90%
ENSG00000036054.12	ENST00000344949.9,ENST00000394144.8,ENST00000471098.1,ENST00000471273.1,ENST00000475134.1,ENST00000484231.1,ENST00000485687.5,ENST00000486274.5,ENST00000496167.1	2684.3	2464.21	467	7.06	5.94	467	0	7.65	6.77	5.92414	9.3952	0.080429	5.27494	8.34533	0.0805025	chr3	100261000	100325251	100293125	+	protein_coding	KNOWN	TBC1D23	9	19	-0.52602	Decile 3	Vigintile 6	Expr 40-50%
ENSG00000036257.12	ENST00000264414.8,ENST00000344951.8,ENST00000409096.5,ENST00000409777.5,ENST00000432260.2,ENST00000436172.1,ENST00000451538.1,ENST00000454323.1,ENST00000481135.1,ENST00000484081.1,ENST00000487558.1,ENST00000497715.1,ENST00000536702.1,ENST00000541548.5,ENST00000546102.1,ENST00000617432.4	2334.69	2114.58	2769	48.78	41.06	2768.3	0.95	48.07	42.51	45.4941	50.7719	0.0190001	40.2236	44.8898	0.0189871	chr2	224470150	224585397	224527773	-	protein_coding	KNOWN	CUL3	16	16	-0.207402	Decile 6	Vigintile 11	Expr 80-90%
ENSG00000036448.9	ENST00000262113.8,ENST00000517520.1,ENST00000518203.5,ENST00000518513.1,ENST00000518803.1,ENST00000519372.5,ENST00000519518.5,ENST00000519631.5,ENST00000520072.5,ENST00000520298.5,ENST00000520779.1,ENST00000523438.1,ENST00000523443.5,ENST00000612167.4,ENST00000621894.4	1017.27	797.17	18	0.84	0.71	18	0	6.71	5.94	1.24676	16.6194	0.453377	1.13137	14.733	0.453446	chr8	2045040	2165552	2105296	+	protein_coding	KNOWN	MYOM2	15	37	-0.02616	Decile 7	Vigintile 14	Expr 20-30%
ENSG00000036473.6	ENST00000039007.4,ENST00000488812.1	1106	885.91	0	0	0	0	0	0.11	0.1	0.00154738	0.29279	0.509591	0.00116476	0.258732	0.509643	chrX	38352545	38421450	38386997	+	protein_coding	KNOWN	OTC	2	10	-0.43868	Decile 4	Vigintile 7	Non-expressed
ENSG00000036530.8	ENST00000261835.7,ENST00000380228.6,ENST00000554176.5,ENST00000554611.5,ENST00000554917.5,ENST00000556313.1,ENST00000556822.1	1910.36	1690.27	54	1.19	1	54	0	1.47	1.3	0.889299	2.06992	0.142735	0.787685	1.83216	0.142671	chr14	99684304	99727301	99705802	+	protein_coding	KNOWN	CYP46A1	7	15	0.293205	Decile 9	Vigintile 17	Expr 20-30%
ENSG00000036549.12	ENST00000370798.5,ENST00000370801.7,ENST00000414381.5,ENST00000433749.5,ENST00000458763.2,ENST00000463166.5,ENST00000469944.1,ENST00000474746.1,ENST00000476195.5,ENST00000476275.5,ENST00000481346.5	3855.47	3635.36	1377	14.11	11.88	1377	0	14.53	12.85	13.1925	15.9228	0.0327187	11.6966	14.1113	0.0326823	chr1	77562416	77683419	77622917	-	protein_coding	KNOWN	ZZZ3	11	15	-0.277033	Decile 5	Vigintile 10	Expr 60-70%
ENSG00000036565.14	ENST00000265808.11,ENST00000276373.9,ENST00000381608.8,ENST00000437980.3,ENST00000440926.3,ENST00000517776.5,ENST00000519026.5,ENST00000519171.1,ENST00000522513.5,ENST00000524272.1	1999.9	1779.79	0	0	0	0	0	0.3	0.26	0.102364	0.522848	0.256096	0.0904413	0.46246	0.25594	chr8	20144855	20183206	20164030	-	protein_coding	KNOWN	SLC18A1	10	17	-0.181534	Decile 6	Vigintile 12	Non-expressed
ENSG00000036672.15	ENST00000260187.6,ENST00000455332.6,ENST00000525189.5,ENST00000525735.1,ENST00000527843.1,ENST00000531070.1,ENST00000532613.1	2869.17	2649.06	299	4.2	3.54	296.14	2.77	4.57	4.04	3.76375	5.38988	0.0615063	3.32823	4.76727	0.0615464	chr11	119355215	119381726	119368470	-	protein_coding	KNOWN	USP2	7	13	1.16962	Decile 10	Vigintile 20	Expr 30-40%
ENSG00000036828.13	ENST00000490131.5,ENST00000490186.1,ENST00000498619.2	4734.69	4514.58	23	0.19	0.16	23	0	0.3	0.26	0.139419	0.501044	0.204332	0.123609	0.443612	0.204272	chr3	122183683	122286503	122235093	+	protein_coding	KNOWN	CASR	3	7	-0.227474	Decile 6	Vigintile 11	Expr 10-20%
ENSG00000037042.8	ENST00000251412.7,ENST00000588870.1,ENST00000590396.1	1600.02	1379.9	520.62	14.06	11.83	520.68	4.24	13.4	11.85	12.1847	14.6478	0.0317926	10.7703	12.9512	0.0317195	chr17	42659305	42667006	42663155	+	protein_coding	KNOWN	TUBG2	3	11	1.04446	Decile 10	Vigintile 20	Expr 60-70%
ENSG00000037241.7	ENST00000265100.6,ENST00000519156.1,ENST00000519239.5,ENST00000519522.1,ENST00000519974.5,ENST00000521476.5	680.89	460.95	736.47	59.52	50.1	736.45	0.74	59.02	52.18	52.5233	66.6324	0.039052	46.4306	58.9175	0.0390089	chr5	172958729	172969771	172964250	+	protein_coding	KNOWN	RPL26L1	6	4	0.51928	Decile 9	Vigintile 18	Expr 80-90%
ENSG00000037280.15	ENST00000261937.10,ENST00000393347.7,ENST00000424276.6,ENST00000502293.5,ENST00000502603.5,ENST00000502649.5,ENST00000507059.5,ENST00000510000.1,ENST00000512795.1,ENST00000513527.1,ENST00000514810.1,ENST00000619105.4	4282.23	4062.12	496	4.55	3.83	496	0	5.29	4.68	4.29558	6.35941	0.0675297	3.79577	5.62144	0.0674641	chr5	180601506	180649624	180625565	-	protein_coding	KNOWN	FLT4	12	30	1.2702	Decile 10	Vigintile 20	Expr 30-40%
ENSG00000037474.14	ENST00000264670.10,ENST00000502932.1,ENST00000504374.5,ENST00000505264.1,ENST00000505892.5,ENST00000506139.5,ENST00000507888.1,ENST00000513888.5,ENST00000514127.1	2630.16	2410.05	4005	61.91	52.11	4005	0	59.26	52.4	56.7041	61.8271	0.0148948	50.1934	54.7203	0.0148646	chr5	6599239	6633291	6616265	-	protein_coding	KNOWN	NSUN2	9	19	0.012841	Decile 7	Vigintile 14	Expr 80-90%
ENSG00000037637.10	ENST00000375592.7,ENST00000444116.1,ENST00000456164.5,ENST00000478089.1	4016.6	3796.48	909	8.92	7.51	909	0	8.54	7.55	7.21589	9.84649	0.0525886	6.39089	8.71747	0.0525161	chr1	16246839	16352454	16299646	-	protein_coding	KNOWN	FBXO42	4	10	0.844315	Decile 10	Vigintile 19	Expr 50-60%
ENSG00000037749.11	ENST00000322602.9,ENST00000439768.2,ENST00000518497.5,ENST00000519325.1,ENST00000519612.5,ENST00000519928.1,ENST00000520327.5,ENST00000520899.1,ENST00000521527.5,ENST00000522177.1,ENST00000522440.5,ENST00000522782.5	1640.73	1420.63	502	13.16	11.08	502	0	13.56	11.99	11.5569	15.7758	0.0534209	10.1519	13.8845	0.0533984	chr5	154038906	154220478	154129692	+	protein_coding	KNOWN	MFAP3	12	5	-0.091988	Decile 7	Vigintile 13	Expr 50-60%
ENSG00000037757.13	ENST00000040663.7,ENST00000319545.12,ENST00000588526.5,ENST00000589290.1,ENST00000591688.5,ENST00000593245.5	1821.77	1601.66	614.12	14.28	12.02	612.03	5.08	13.87	12.27	12.5993	15.2261	0.0327498	11.1704	13.4973	0.0327729	chr19	13764532	13774282	13769407	+	protein_coding	KNOWN	MRI1	6	6	1.42856	Decile 10	Vigintile 20	Expr 60-70%
ENSG00000037897.16	ENST00000257848.7,ENST00000324871.11,ENST00000547653.1,ENST00000548504.1,ENST00000548681.1,ENST00000549773.1,ENST00000551117.1,ENST00000553125.5	914	693.92	633.75	34.02	28.64	633.74	0.44	32.99	29.17	29.3807	36.6976	0.0384207	25.9075	32.3811	0.0383812	chr12	57768471	57772793	57770632	-	protein_coding	KNOWN	METTL1	8	6	1.17003	Decile 10	Vigintile 20	Expr 70-80%
ENSG00000037965.5	ENST00000040584.5	1889	1668.89	3	0.07	0.06	3	0	0.08	0.07	0.0163642	0.168448	0.337955	0.0147858	0.149353	0.337777	chr12	54009106	54012362	54010734	+	protein_coding	KNOWN	HOXC8	1	2	1.0933	Decile 10	Vigintile 20	Expr 0-10%
ENSG00000038002.8	ENST00000264595.6,ENST00000502310.5,ENST00000506853.5,ENST00000510635.1,ENST00000510955.5,ENST00000511231.1	1123.62	903.52	283	11.67	9.82	283	0	12.29	10.87	10.204	14.4886	0.0596992	9.015	12.8045	0.0596454	chr4	177430770	177442503	177436636	-	protein_coding	KNOWN	AGA	6	9	-0.551523	Decile 3	Vigintile 5	Expr 50-60%
ENSG00000038210.12	ENST00000264864.7	3540	3319.89	271.38	3.05	2.56	272.59	13.76	2.91	2.57	2.46095	3.36058	0.0523347	2.18852	2.98391	0.0522872	chr4	25233975	25279092	25256533	+	protein_coding	KNOWN	PI4K2B	1	10	0.056741	Decile 8	Vigintile 15	Expr 30-40%
ENSG00000038219.12	ENST00000040738.9,ENST00000482713.1,ENST00000505343.1,ENST00000507943.1,ENST00000509897.1,ENST00000511119.1	8170.02	7949.9	3683	17.26	14.53	3683	0	25.19	22.27	15.6128	42.7413	0.200932	13.7773	37.7684	0.200902	chr4	13568738	13627723	13598230	-	protein_coding	KNOWN	BOD1L1	6	26	-0.565462	Decile 3	Vigintile 5	Expr 60-70%
ENSG00000038274.16	ENST00000280969.9,ENST00000321757.10,ENST00000421814.6,ENST00000518095.5,ENST00000519719.1,ENST00000520449.1,ENST00000521838.2,ENST00000523606.1	1863.01	1642.91	1867	42.34	35.63	1867	0	40.62	35.91	36.8586	44.3729	0.0318601	32.6019	39.2559	0.0318269	chr5	163503114	163519336	163511225	+	protein_coding	KNOWN	MAT2B	8	7	-0.250318	Decile 6	Vigintile 11	Expr 80-90%
ENSG00000038295.7	ENST00000061240.6,ENST00000504560.5,ENST00000506144.1,ENST00000507499.5,ENST00000509505.5,ENST00000513213.5	2279	2058.92	23	0.42	0.35	23	0	0.63	0.55	0.253067	1.07946	0.242034	0.224005	0.955263	0.24201	chr4	165873258	166103895	165988576	+	protein_coding	KNOWN	TLL1	6	22	-0.663515	Decile 2	Vigintile 3	Expr 10-20%
ENSG00000038358.14	ENST00000358933.9,ENST00000536072.6,ENST00000572031.1,ENST00000572221.5,ENST00000572724.1,ENST00000573985.5,ENST00000573992.5,ENST00000574770.5,ENST00000575033.1,ENST00000575507.1,ENST00000575514.5,ENST00000576972.5,ENST00000577028.5,ENST00000577105.1	2496.09	2276.01	3603.36	58.98	49.64	3603.15	6.38	57.52	50.86	52.6838	62.354	0.028698	46.7318	55.2864	0.0287021	chr16	67873023	67884503	67878763	+	protein_coding	KNOWN	EDC4	14	29	1.35152	Decile 10	Vigintile 20	Expr 80-90%
ENSG00000038382.17	ENST00000344135.5,ENST00000344204.8,ENST00000502490.1,ENST00000502816.1,ENST00000503399.1,ENST00000504606.1,ENST00000505971.5,ENST00000506611.1,ENST00000507714.1,ENST00000508283.5,ENST00000508343.1,ENST00000508717.1,ENST00000509354.1,ENST00000509967.6,ENST00000510281.1,ENST00000510757.1,ENST00000511019.1,ENST00000512070.6,ENST00000512303.1,ENST00000512979.1,ENST00000513206.5,ENST00000515144.5,ENS…	5353.9	5133.8	4042	29.33	24.69	4042	0	31.51	27.86	28.3417	34.7769	0.0349574	25.0472	30.7432	0.0349435	chr5	14143702	14532128	14337915	+	protein_coding	KNOWN	TRIO	24	57	-0.063262	Decile 7	Vigintile 13	Expr 70-80%
ENSG00000038427.15	ENST00000265077.7,ENST00000342785.8,ENST00000343200.9,ENST00000502527.2,ENST00000503923.1,ENST00000505615.1,ENST00000507162.1,ENST00000512590.6,ENST00000513016.5,ENST00000513960.5,ENST00000513984.5,ENST00000515397.1	5188.48	4968.39	22093	165.66	139.43	22092.7	0.63	157.91	139.63	150.863	165.013	0.0154225	133.552	146.043	0.0153733	chr5	83471465	83582303	83526884	+	protein_coding	KNOWN	VCAN	12	15	-0.409823	Decile 4	Vigintile 8	Expr 95-96%
ENSG00000038532.14	ENST00000261657.5,ENST00000409552.4,ENST00000409790.5,ENST00000428742.6,ENST00000436973.5,ENST00000459723.1,ENST00000463459.1,ENST00000463896.5,ENST00000465491.5,ENST00000476025.5,ENST00000487189.5,ENST00000494853.1	4256.81	4036.69	1076	9.93	8.36	1076	0	11.07	9.78	9.36176	12.8513	0.0540087	8.28408	11.3699	0.0539965	chr16	10944488	11182189	11063338	+	protein_coding	KNOWN	CLEC16A	12	24	0.659768	Decile 9	Vigintile 18	Expr 50-60%
ENSG00000038945.14	ENST00000262101.9,ENST00000350896.3,ENST00000355282.6,ENST00000381998.8,ENST00000445506.6,ENST00000517522.1,ENST00000518026.5,ENST00000518343.5,ENST00000518960.5,ENST00000519060.6,ENST00000520846.1,ENST00000521876.5,ENST00000522130.1,ENST00000522672.5	1157.07	937.03	0	0	0	0	0	1.36	1.2	0.562908	2.32188	0.229524	0.5001	2.05605	0.229486	chr8	16107878	16567490	16337684	-	protein_coding	KNOWN	MSR1	14	10	-0.627451	Decile 2	Vigintile 4	Non-expressed
ENSG00000039068.18	ENST00000261769.9,ENST00000422392.6,ENST00000561751.1,ENST00000562118.1,ENST00000562836.5,ENST00000564676.5,ENST00000564745.1,ENST00000565810.1,ENST00000566510.5,ENST00000566612.5,ENST00000567320.1,ENST00000611625.4,ENST00000612417.4,ENST00000621016.4	4136.29	3916.18	12908	122.79	103.35	12908	0.17	118.3	104.6	111.955	124.557	0.0178608	98.9394	110.047	0.0178481	chr16	68737225	68835548	68786386	+	protein_coding	KNOWN	CDH1	14	17	1.03802	Decile 10	Vigintile 20	Expr 94-95%
ENSG00000039123.15	ENST00000230640.9,ENST00000502953.1,ENST00000503165.5,ENST00000504388.5,ENST00000504997.1,ENST00000505565.5,ENST00000506750.5,ENST00000508716.1,ENST00000518955.1	3139.18	2919.08	3132.42	39.98	33.65	3132	8.85	38.47	34.02	33.6655	43.3979	0.0445002	29.7324	38.3422	0.0445796	chr5	55307760	55425581	55366670	+	protein_coding	KNOWN	SKIV2L2	9	27	-0.309833	Decile 5	Vigintile 10	Expr 80-90%
ENSG00000039139.9	ENST00000265104.4,ENST00000504001.3,ENST00000508040.1,ENST00000512443.1	11731.2	11511	44	0.14	0.12	44	0	0.31	0.28	0.128624	0.538388	0.236357	0.113694	0.476249	0.23635	chr5	13690331	13944543	13817437	-	protein_coding	KNOWN	DNAH5	4	79	-0.426095	Decile 4	Vigintile 8	Expr 0-10%
ENSG00000039319.16	ENST00000338008.9,ENST00000505560.4,ENST00000507548.1,ENST00000509558.1,ENST00000509562.2,ENST00000510158.5,ENST00000510995.1,ENST00000511050.5,ENST00000511829.5,ENST00000512442.1,ENST00000512558.5,ENST00000512907.5,ENST00000513789.1	2777.53	2557.48	669.17	9.75	8.2	669.17	0.37	10.33	9.14	7.67912	13.1622	0.0922984	6.7947	11.6472	0.0924054	chr5	80408013	80479350	80443681	+	protein_coding	KNOWN	ZFYVE16	13	19	-0.201187	Decile 6	Vigintile 11	Expr 50-60%
ENSG00000039523.17	ENST00000042381.8,ENST00000379312.7,ENST00000422602.6,ENST00000428437.6,ENST00000540839.7,ENST00000561534.5,ENST00000562116.1,ENST00000562755.5,ENST00000564616.1,ENST00000565176.5,ENST00000565190.1,ENST00000565679.1,ENST00000566522.5,ENST00000566559.5,ENST00000566730.1,ENST00000566815.5,ENST00000566907.1,ENST00000566920.5,ENST00000568959.1,ENST00000569179.1,ENST00000569253.5,ENST00000569474.5,ENS…	2679.4	2459.32	480	7.27	6.12	479.64	0.59	10.67	9.44	7.57324	14.141	0.101418	6.6966	12.5084	0.101581	chr16	67518418	67546788	67532603	+	protein_coding	KNOWN	FAM65A	23	23	1.25993	Decile 10	Vigintile 20	Expr 40-50%
ENSG00000039537.13	ENST00000263413.7,ENST00000337836.9,ENST00000417809.1,ENST00000433294.1,ENST00000461473.1,ENST00000473450.1,ENST00000475349.5,ENST00000511470.1	1368.12	1148.06	0	0	0	0	0	0.62	0.55	0.18937	1.13102	0.274402	0.169425	1.0025	0.274481	chr5	41142234	41261438	41201836	-	protein_coding	KNOWN	C6	8	18	-0.704243	Decile 1	Vigintile 2	Non-expressed
ENSG00000039560.13	ENST00000265109.7,ENST00000428746.6,ENST00000502736.5,ENST00000503222.5,ENST00000503673.5,ENST00000504052.5,ENST00000505185.5,ENST00000506376.1,ENST00000507276.5,ENST00000507502.5,ENST00000507883.1,ENST00000508315.5,ENST00000508777.5,ENST00000509247.1,ENST00000510319.5,ENST00000510386.1,ENST00000511652.5,ENST00000512305.5,ENST00000512625.5,ENST00000512629.5,ENST00000513772.1,ENST00000513974.5,ENS…	3439.07	3218.98	7374.29	85.34	71.83	7374.28	0.5	86.55	76.53	78.0783	96.0335	0.0322909	69.1953	85.0859	0.0323204	chr5	34656237	34832627	34744432	+	protein_coding	KNOWN	RAI14	28	20	-0.024342	Decile 7	Vigintile 14	Expr 91-92%
ENSG00000039600.10	ENST00000265007.10,ENST00000311371.9,ENST00000519442.1	3062.57	2842.46	11	0.14	0.12	11	0	0.21	0.18	0.0991357	0.324246	0.194379	0.0878979	0.287008	0.194493	chr5	157625679	157671480	157648579	-	protein_coding	KNOWN	SOX30	3	6	0.011339	Decile 7	Vigintile 14	Expr 0-10%
ENSG00000039650.9	ENST00000322344.7,ENST00000593706.3,ENST00000593946.5,ENST00000594661.5,ENST00000595081.5,ENST00000595792.1,ENST00000596014.5,ENST00000596726.3,ENST00000597965.2,ENST00000598020.3,ENST00000599454.5,ENST00000599543.3,ENST00000600573.5,ENST00000600910.5,ENST00000601816.3,ENST00000625216.2,ENST00000625299.1,ENST00000626274.2,ENST00000627232.2,ENST00000627317.1,ENST00000629088.1,ENST00000629179.1,ENS…	1152.18	932.12	1507	60.23	50.69	1507	0	59.38	52.51	54.4246	64.1066	0.0279711	48.226	56.7783	0.027961	chr19	49861204	49878351	49869777	-	protein_coding	KNOWN	PNKP	23	17	2.0971	Decile 10	Vigintile 20	Expr 80-90%
ENSG00000039987.6	ENST00000042931.1,ENST00000549706.5,ENST00000552539.1,ENST00000553030.5	1948.19	1728.07	110	2.37	2	110	0	2.4	2.12	1.92384	2.87711	0.0678425	1.69842	2.54158	0.0678904	chr19	12751702	12758458	12755080	+	protein_coding	KNOWN	BEST2	4	10	1.82393	Decile 10	Vigintile 20	Expr 30-40%
ENSG00000040199.18	ENST00000393524.6,ENST00000538126.5,ENST00000564884.5,ENST00000567016.1,ENST00000568004.5,ENST00000568954.5,ENST00000574977.1	7247.79	7027.68	1056.97	5.6	4.72	1059.58	2.33	5.67	5.01	5.01031	6.42844	0.042232	4.43279	5.68747	0.042232	chr16	71637835	71724701	71681268	-	protein_coding	KNOWN	PHLPP2	7	19	0.411308	Decile 9	Vigintile 17	Expr 40-50%
ENSG00000040275.16	ENST00000265295.8,ENST00000503209.1,ENST00000503871.1,ENST00000505977.1,ENST00000506574.5,ENST00000507232.5,ENST00000508247.5,ENST00000508837.1,ENST00000509785.5,ENST00000510751.5,ENST00000512028.5,ENST00000513795.1,ENST00000513941.5,ENST00000515224.5,ENST00000523518.1,ENST00000629457.2	1810.65	1590.59	1054	24.69	20.78	1054	0	25.41	22.47	21.0523	29.9813	0.0626597	18.6243	26.5206	0.0627626	chr5	169583634	169604778	169594206	+	protein_coding	KNOWN	SPDL1	16	12	-0.258853	Decile 6	Vigintile 11	Expr 70-80%
ENSG00000040341.17	ENST00000355780.9,ENST00000517542.5,ENST00000518502.5,ENST00000518767.5,ENST00000518981.5,ENST00000519818.5,ENST00000519961.5,ENST00000520872.5,ENST00000520945.5,ENST00000521210.5,ENST00000521293.5,ENST00000521419.5,ENST00000521447.5,ENST00000521451.5,ENST00000521727.5,ENST00000521736.5,ENST00000521845.5,ENST00000522061.5,ENST00000522509.5,ENST00000522695.5,ENST00000522818.1,ENST00000522962.5,ENS…	1767.14	1547.04	1216.62	29.3	24.66	1216.12	2.25	33.4	29.53	27.8848	39.9002	0.0573388	24.6989	35.3287	0.0573478	chr8	73420369	73747708	73584038	-	protein_coding	KNOWN	STAU2	29	15	-0.303902	Decile 5	Vigintile 10	Expr 70-80%
ENSG00000040487.12	ENST00000375153.7,ENST00000375155.7,ENST00000400548.6,ENST00000432465.1,ENST00000469076.5,ENST00000497827.1	1579.75	1359.64	468	12.82	10.79	468	0	12.35	10.92	11.1489	13.571	0.0340776	9.86214	12.0067	0.0340793	chr1	19312326	19329300	19320813	+	protein_coding	KNOWN	PQLC2	6	9	1.36132	Decile 10	Vigintile 20	Expr 50-60%
ENSG00000040531.14	ENST00000046640.7,ENST00000381870.7,ENST00000399306.6,ENST00000452111.5,ENST00000467663.5,ENST00000488623.5,ENST00000495445.5,ENST00000574218.1,ENST00000574776.5,ENST00000576979.1	2374.82	2154.72	680	11.76	9.9	680	0	12.38	10.95	10.9016	13.9184	0.0416042	9.64576	12.3154	0.041625	chr17	3636468	3661542	3649005	+	protein_coding	KNOWN	CTNS	10	13	1.26131	Decile 10	Vigintile 20	Expr 50-60%
ENSG00000040608.13	ENST00000043402.7,ENST00000416372.5,ENST00000425986.1,ENST00000463936.1,ENST00000469601.1,ENST00000474642.1	1819.69	1599.57	723	16.84	14.17	723	0	16.37	14.48	15.1002	17.6405	0.0264108	13.38	15.6236	0.0263757	chr22	20241415	20283246	20262330	-	protein_coding	KNOWN	RTN4R	6	3	1.4246	Decile 10	Vigintile 20	Expr 60-70%
ENSG00000040633.12	ENST00000320316.7,ENST00000454255.6,ENST00000570753.5,ENST00000570899.1,ENST00000571362.5,ENST00000572789.5,ENST00000573826.5,ENST00000574236.5,ENST00000574323.5,ENST00000574407.5,ENST00000574899.1,ENST00000576955.5,ENST00000613632.4	1738.21	1518.11	1925	47.24	39.76	1925	0	46.84	41.42	43.4753	50.4125	0.0251778	38.4356	44.5591	0.0251686	chr17	7235028	7239722	7237375	-	protein_coding	KNOWN	PHF23	13	6	2.09267	Decile 10	Vigintile 20	Expr 80-90%
ENSG00000040731.10	ENST00000264463.8,ENST00000502921.5,ENST00000503958.1,ENST00000510477.5	3438	3217.89	5	0.06	0.05	5	0	0.15	0.13	0.0532067	0.271073	0.252684	0.0471987	0.239956	0.252618	chr5	24487100	24644978	24566039	-	protein_coding	KNOWN	CDH10	4	12	-0.824827	Decile 1	Vigintile 1	Expr 0-10%
ENSG00000040933.15	ENST00000074304.9,ENST00000409016.8,ENST00000409463.5,ENST00000409540.7,ENST00000409851.7,ENST00000463367.1,ENST00000467042.1,ENST00000468638.1,ENST00000498026.1,ENST00000523221.1	3864.69	3644.6	2679	27.38	23.05	2679	0	26.35	23.3	23.5785	29.1765	0.0368294	20.8415	25.7966	0.0368081	chr2	98444854	98594390	98519622	+	protein_coding	KNOWN	INPP4A	10	26	0.451888	Decile 9	Vigintile 18	Expr 70-80%
ENSG00000041353.9	ENST00000262094.9,ENST00000586570.5,ENST00000586594.1,ENST00000592334.1	2183.25	1963.23	0	0	0	0	0	0.44	0.39	0.0419891	0.946101	0.391994	0.0371839	0.836812	0.391895	chr18	54717860	54895516	54806688	+	protein_coding	KNOWN	RAB27B	4	6	-0.479102	Decile 4	Vigintile 7	Non-expressed
ENSG00000041357.15	ENST00000044462.11,ENST00000413382.6,ENST00000557929.5,ENST00000558094.1,ENST00000558281.5,ENST00000558341.5,ENST00000558635.1,ENST00000558639.5,ENST00000559082.5,ENST00000559146.5,ENST00000559154.5,ENST00000559365.5,ENST00000559437.5,ENST00000559906.1,ENST00000559934.5,ENST00000559948.5,ENST00000560033.5,ENST00000560099.5,ENST00000560217.5,ENST00000560737.5,ENST00000560842.1	796.95	576.87	4916	317.47	267.2	4916	0	302.1	267.11	292.811	311.758	0.0108033	258.941	275.652	0.0107799	chr15	78540405	78552419	78546412	+	protein_coding	KNOWN	PSMA4	21	9	0.339653	Decile 9	Vigintile 17	Expr 98-99%
ENSG00000041515.15	ENST00000251041.9,ENST00000356711.6,ENST00000357550.3,ENST00000375857.6,ENST00000457511.6,ENST00000467639.1,ENST00000482793.1	3117	2896.89	1	0.01	0.01	1	0	0.27	0.24	0.0376429	0.596304	0.390863	0.0355865	0.529821	0.390859	chr13	108596152	109208007	108902079	+	protein_coding	KNOWN	MYO16	7	35	-0.400877	Decile 4	Vigintile 8	Expr 0-10%
ENSG00000041802.10	ENST00000265245.9,ENST00000427461.1,ENST00000437613.1,ENST00000460584.1,ENST00000461343.1,ENST00000466391.1,ENST00000475763.5,ENST00000480853.1	2901.82	2681.72	2262	31.42	26.45	2262	0	30.56	27.02	28.1182	33.0924	0.0281166	24.8965	29.2946	0.0281095	chr3	194640788	194672477	194656632	-	protein_coding	KNOWN	LSG1	8	14	0.248023	Decile 8	Vigintile 16	Expr 70-80%
ENSG00000041880.14	ENST00000398755.7,ENST00000417220.6,ENST00000431474.5,ENST00000470601.5,ENST00000470749.1,ENST00000471971.5,ENST00000475782.1,ENST00000486510.1,ENST00000498510.1	1596.18	1376.1	38	1.03	0.87	38	0	1.6	1.41	0.922583	2.40314	0.162933	0.793408	2.10327	0.162846	chr3	51942345	51948867	51945606	+	protein_coding	KNOWN	PARP3	9	12	1.17073	Decile 10	Vigintile 20	Expr 20-30%
ENSG00000041982.15	ENST00000341037.8,ENST00000350763.8,ENST00000423613.6,ENST00000460345.1,ENST00000473855.1,ENST00000476680.1,ENST00000481475.1,ENST00000498724.5,ENST00000534839.1,ENST00000535648.5,ENST00000537320.5,ENST00000542877.5,ENST00000544972.1,ENST00000635336.1	6586.98	6366.86	509	2.98	2.51	509	0	3.87	3.42	3.05327	4.79807	0.0775193	2.68667	4.22973	0.0775409	chr9	115019578	115118257	115068917	-	protein_coding	KNOWN	TNC	14	28	-0.273941	Decile 5	Vigintile 10	Expr 30-40%
ENSG00000041988.15	ENST00000054650.8,ENST00000307896.10,ENST00000377627.7,ENST00000472925.1,ENST00000480647.1,ENST00000484669.6,ENST00000484676.1,ENST00000487819.5	1376.41	1156.31	316.66	10.2	8.59	320.35	20.74	10.48	9.27	8.84854	12.1431	0.0531096	7.85018	10.7633	0.0531339	chr1	6624866	6635586	6630226	+	protein_coding	KNOWN	THAP3	8	6	1.01276	Decile 10	Vigintile 19	Expr 50-60%
ENSG00000042062.11	ENST00000045083.6,ENST00000327979.6,ENST00000462493.1,ENST00000462842.1,ENST00000482129.1,ENST00000488529.5	2790.95	2570.84	293	4.25	3.57	293	0	4.24	3.75	3.42383	5.06322	0.0678111	3.0277	4.47834	0.0677353	chr20	50586108	50691528	50638818	-	protein_coding	KNOWN	FAM65C	6	22	0.602401	Decile 9	Vigintile 18	Expr 30-40%
ENSG00000042088.13	ENST00000335725.8,ENST00000393452.7,ENST00000393454.6,ENST00000545686.6,ENST00000553527.1,ENST00000553569.1,ENST00000553617.5,ENST00000553989.1,ENST00000554180.5,ENST00000554976.5,ENST00000555178.5,ENST00000555565.5,ENST00000555880.5,ENST00000556063.1,ENST00000556498.1,ENST00000556867.1,ENST00000557782.1	2111.78	1891.67	1454	28.63	24.1	1454	0	28.68	25.36	26.4568	31.0149	0.0276358	23.3564	27.3901	0.0275751	chr14	89954939	90044768	89999853	+	protein_coding	KNOWN	TDP1	17	18	-0.126856	Decile 6	Vigintile 12	Expr 70-80%
ENSG00000042286.14	ENST00000307864.2,ENST00000373248.5,ENST00000482166.1,ENST00000613322.4	3206.53	2986.42	241	3.01	2.53	241	0	2.97	2.63	2.57745	3.37413	0.0457889	2.27848	2.98359	0.0457218	chr10	70098223	70132934	70115578	-	protein_coding	KNOWN	AIFM2	4	9	0.302133	Decile 9	Vigintile 17	Expr 30-40%
ENSG00000042304.10	ENST00000264387.8,ENST00000409066.1	1965	1744.89	0	0	0	0	0	0.04	0.04	0.00119356	0.0965907	0.472701	0.0010533	0.0854024	0.472754	chr2	227610090	227633320	227621705	-	protein_coding	KNOWN	C2orf83	2	4	-0.387453	Decile 4	Vigintile 8	Non-expressed
ENSG00000042317.16	ENST00000045347.11,ENST00000356583.9,ENST00000393545.8,ENST00000553303.1,ENST00000553626.5,ENST00000553885.5,ENST00000553908.5,ENST00000554102.5,ENST00000554168.5,ENST00000554802.1,ENST00000555356.5,ENST00000555401.5,ENST00000555515.5,ENST00000555534.5,ENST00000555715.5,ENST00000556406.5,ENST00000556553.5,ENST00000556666.5,ENST00000556870.5,ENST00000557248.5,ENST00000557567.1,ENST00000557724.5	1745.97	1525.86	159	3.88	3.27	159	0	5.47	4.84	4.37676	6.60053	0.0704583	3.86886	5.83531	0.0703397	chr14	88384924	88470350	88427637	+	protein_coding	KNOWN	SPATA7	22	13	-0.448696	Decile 4	Vigintile 7	Expr 30-40%
ENSG00000042429.10	ENST00000251871.7,ENST00000507258.3,ENST00000525026.5,ENST00000525613.1,ENST00000528786.1,ENST00000529626.1,ENST00000530819.1,ENST00000531920.5,ENST00000533133.5,ENST00000533359.5,ENST00000533367.5	1532.27	1312.2	770	21.86	18.4	770	0	21.2	18.74	17.8441	24.5697	0.0551273	15.8594	21.811	0.0550507	chr11	93784227	93814695	93799461	+	protein_coding	KNOWN	MED17	11	12	0.296728	Decile 9	Vigintile 17	Expr 70-80%
ENSG00000042445.13	ENST00000295802.8,ENST00000409984.2,ENST00000429806.5,ENST00000438611.4,ENST00000449375.1,ENST00000482694.1,ENST00000490291.1	2753.91	2533.8	1099	16.16	13.6	1099	0	15.76	13.94	14.5038	17.0643	0.0279941	12.814	15.0815	0.0279529	chr2	85342088	85354620	85348354	-	protein_coding	KNOWN	RETSAT	7	11	0.609773	Decile 9	Vigintile 18	Expr 60-70%
ENSG00000042493.15	ENST00000263867.8,ENST00000409275.1,ENST00000409670.5,ENST00000409724.5,ENST00000409921.5,ENST00000415012.1,ENST00000439385.5,ENST00000447219.6,ENST00000449030.5,ENST00000453973.5,ENST00000459793.2,ENST00000471064.1,ENST00000479651.1,ENST00000483659.5,ENST00000491267.1	834.46	614.41	1187	71.97	60.58	1187	0	70.44	62.28	65.1294	75.9451	0.0264042	57.629	67.193	0.0263884	chr2	85394748	85418432	85406590	-	protein_coding	KNOWN	CAPG	15	10	0.513093	Decile 9	Vigintile 18	Expr 90-91%
ENSG00000042753.11	ENST00000263270.10,ENST00000352203.8,ENST00000593442.5,ENST00000597020.5,ENST00000597421.1,ENST00000598027.1,ENST00000599990.5,ENST00000600964.1,ENST00000601498.5,ENST00000601649.1	847.05	626.95	2570	152.71	128.53	2570	0	146.47	129.51	140.39	152.929	0.0147147	124.079	135.145	0.0146783	chr19	46838136	46850992	46844564	-	protein_coding	KNOWN	AP2S1	10	5	1.20077	Decile 10	Vigintile 20	Expr 95-96%
ENSG00000042781.12	ENST00000307340.7,ENST00000366942.3,ENST00000463147.1,ENST00000481786.1	18883	18662.9	5	0.01	0.01	5	0	0.19	0.17	0.0176264	0.436481	0.426965	0.0158921	0.386528	0.427226	chr1	215622894	216423396	216023145	-	protein_coding	KNOWN	USH2A	4	72	-0.582566	Decile 3	Vigintile 5	Expr 0-10%
ENSG00000042813.7	ENST00000046087.6,ENST00000413331.1,ENST00000419417.5,ENST00000450231.1,ENST00000465922.1,ENST00000491129.5	757.33	537.27	0	0	0	0	0	0.5	0.44	0.130325	0.939409	0.293463	0.11413	0.829693	0.293625	chr7	49850421	50121329	49985875	-	protein_coding	KNOWN	ZPBP	6	8	-0.405188	Decile 4	Vigintile 8	Non-expressed
ENSG00000042832.11	ENST00000220616.8,ENST00000518058.1,ENST00000518097.1,ENST00000518108.1,ENST00000518505.1,ENST00000519178.5,ENST00000519294.5,ENST00000519543.5,ENST00000520089.5,ENST00000520197.5,ENST00000520769.1,ENST00000521107.1,ENST00000522523.5,ENST00000522691.1,ENST00000522797.1,ENST00000522809.1,ENST00000522996.5,ENST00000523756.5,ENST00000523901.1,ENST00000524151.5	1498.8	1280.67	0	0	0	0	0	11.49	10.16	0.96947	31.5012	0.547723	0.836962	27.8599	0.547913	chr8	132866958	133134903	133000930	+	protein_coding	KNOWN	TG	20	48	-0.193233	Decile 6	Vigintile 12	Non-expressed
ENSG00000042980.12	ENST00000265769.8,ENST00000437154.6,ENST00000518326.1,ENST00000518516.5,ENST00000518737.1,ENST00000520448.5,ENST00000520665.1,ENST00000521110.1,ENST00000521629.5,ENST00000523236.5,ENST00000523379.5,ENST00000523440.1	1694.88	1474.79	34	0.86	0.72	34	0	1.83	1.62	1.09162	2.6513	0.148593	0.962151	2.3414	0.148652	chr8	24294040	24359018	24326529	+	protein_coding	KNOWN	ADAM28	12	23	-0.340428	Decile 5	Vigintile 9	Expr 20-30%
ENSG00000043039.6	ENST00000281437.5,ENST00000605151.1	1980.5	1760.39	0	0	0	0	0	0.04	0.04	0.000865977	0.0961803	0.474408	0.000770837	0.0851187	0.47438	chr11	129375940	129452279	129414109	+	protein_coding	KNOWN	BARX2	2	4	-0.197962	Decile 6	Vigintile 11	Non-expressed
ENSG00000043093.13	ENST00000292782.8,ENST00000460412.5,ENST00000466812.1,ENST00000469954.5,ENST00000487822.5,ENST00000492563.1,ENST00000497606.5,ENST00000632685.1	2911.61	2691.52	714	9.88	8.32	714	0	10.28	9.09	8.33056	12.2187	0.0648625	7.37526	10.8126	0.0649077	chr3	182938074	182985953	182962013	-	protein_coding	KNOWN	DCUN1D1	8	7	-0.071412	Decile 7	Vigintile 13	Expr 50-60%
ENSG00000043143.20	ENST00000282605.8,ENST00000361895.6,ENST00000395003.5,ENST00000402835.5,ENST00000430087.1,ENST00000431355.1,ENST00000453515.1,ENST00000470876.1,ENST00000512386.5,ENST00000515554.1,ENST00000612830.1	4607.2	4387.1	2007	17.04	14.34	2007	0	16.89	14.94	15.4642	18.3205	0.0289497	13.6971	16.2204	0.0288857	chr5	134524312	134583230	134553771	+	protein_coding	KNOWN	JADE2	11	12	0.66875	Decile 9	Vigintile 18	Expr 60-70%
ENSG00000043355.10	ENST00000376335.7,ENST00000468291.1,ENST00000477213.1,ENST00000481565.1,ENST00000490085.5,ENST00000620342.1	2145.08	1925	6354	122.97	103.5	6354	0	121.81	107.7	112.325	132.73	0.0273668	99.2094	117.248	0.0273043	chr13	99981772	99986773	99984272	+	protein_coding	KNOWN	ZIC2	6	5	0.757508	Decile 10	Vigintile 19	Expr 94-95%
ENSG00000043462.11	ENST00000046794.9,ENST00000519149.1,ENST00000519594.5,ENST00000520322.1,ENST00000520344.1,ENST00000521416.5,ENST00000522760.5,ENST00000522823.5,ENST00000523369.1,ENST00000628092.2	1827.46	1607.34	8	0.19	0.16	8	0	0.69	0.61	0.311251	1.12467	0.20692	0.274808	0.994353	0.206953	chr5	170246237	170298227	170272232	-	protein_coding	KNOWN	LCP2	10	21	0.146743	Decile 8	Vigintile 15	Expr 10-20%
ENSG00000043514.15	ENST00000316891.9,ENST00000372818.5,ENST00000441669.6,ENST00000462243.2,ENST00000462797.5,ENST00000465417.5,ENST00000467774.1,ENST00000469476.2,ENST00000486825.6,ENST00000489945.5,ENST00000491865.5,ENST00000492612.6,ENST00000495175.6,ENST00000537440.5,ENST00000541099.5	1805.52	1585.41	757	17.79	14.97	757	0	18.22	16.11	16.465	19.9688	0.0329212	14.5666	17.6667	0.0328673	chr1	39841022	39883511	39862266	-	protein_coding	KNOWN	TRIT1	15	11	0.507768	Decile 9	Vigintile 18	Expr 60-70%
ENSG00000043591.5	ENST00000369295.3	2853	2632.89	3	0.04	0.04	3	0	0.05	0.05	0.00904711	0.105901	0.339194	0.00806297	0.0937368	0.339204	chr10	114044056	114046908	114045482	+	protein_coding	KNOWN	ADRB1	1	1	-0.375864	Decile 5	Vigintile 9	Expr 0-10%
ENSG00000044012.3	ENST00000372581.1	597	376.95	0	0	0	0	0	0.09	0.08	1.78178e-06	0.279638	0.651782	1.57613e-06	0.247393	0.651835	chr1	42153421	42155824	42154622	+	protein_coding	KNOWN	GUCA2B	1	3	0.437246	Decile 9	Vigintile 17	Non-expressed
ENSG00000044090.8	ENST00000265348.7,ENST00000478630.1,ENST00000535468.1	4879.17	4659.06	1382.95	11.06	9.31	1382.95	0.23	10.61	9.38	9.71589	11.5506	0.0295173	8.58987	10.2131	0.0294854	chr6	43037617	43053945	43045781	-	protein_coding	KNOWN	CUL7	3	26	1.34362	Decile 10	Vigintile 20	Expr 50-60%
ENSG00000044115.20	ENST00000302763.11,ENST00000517533.5,ENST00000517534.5,ENST00000517656.5,ENST00000517904.1,ENST00000517980.5,ENST00000518263.5,ENST00000518381.5,ENST00000518585.1,ENST00000518825.5,ENST00000518910.5,ENST00000518919.1,ENST00000519113.5,ENST00000519116.5,ENST00000519309.5,ENST00000519489.1,ENST00000519634.5,ENST00000519768.5,ENST00000520158.5,ENST00000520260.5,ENST00000520339.5,ENST00000520400.5,EN…	3433.11	3213	16057	186.18	156.7	16057	0	186.24	164.68	177.81	195.71	0.0162132	157.209	173.052	0.0162325	chr5	138610967	138935034	138773000	+	protein_coding	KNOWN	CTNNA1	44	19	0.419445	Decile 9	Vigintile 17	Expr 96-97%
ENSG00000044446.11	ENST00000379942.4,ENST00000464455.1,ENST00000469485.5,ENST00000469645.5,ENST00000473597.1,ENST00000473739.5,ENST00000481718.1,ENST00000486231.2	3074.3	2854.2	1799	23.48	19.76	1798.99	0.09	23.35	20.65	20.5112	26.4315	0.0445979	18.1069	23.3453	0.0445999	chrX	18892300	18984598	18938449	-	protein_coding	KNOWN	PHKA2	8	33	0.244841	Decile 8	Vigintile 16	Expr 70-80%
ENSG00000044459.14	ENST00000380641.4,ENST00000380647.7,ENST00000461247.1,ENST00000484374.1	5243.31	5023.19	609	4.52	3.8	609	0	4.47	3.95	4.01566	4.94724	0.0344208	3.55755	4.38253	0.0344425	chr9	17134982	17503923	17319452	+	protein_coding	KNOWN	CNTLN	4	26	-0.446165	Decile 4	Vigintile 7	Expr 30-40%
ENSG00000044524.10	ENST00000336596.6,ENST00000452448.6,ENST00000494014.1	4724.77	4504.65	19	0.16	0.13	19	0	0.19	0.16	0.104075	0.27933	0.16552	0.0930384	0.248049	0.165442	chr3	89107524	89482134	89294829	+	protein_coding	KNOWN	EPHA3	3	17	-0.706335	Decile 1	Vigintile 2	Expr 0-10%
ENSG00000044574.7	ENST00000324460.6	3908	3687.89	22432	226.6	190.72	22432	0.09	214.43	189.6	211.572	217.342	0.00461281	187.171	192.153	0.00448389	chr9	125234853	125241330	125238091	-	protein_coding	KNOWN	HSPA5	1	8	0.4141	Decile 9	Vigintile 17	Expr 97-98%
ENSG00000046604.12	ENST00000261590.12,ENST00000585206.1	5789.8	5569.68	8289.94	55.45	46.67	8289.94	0.25	52.58	46.49	51.3866	53.8009	0.00795026	45.4437	47.5656	0.00791462	chr18	31498043	31549008	31523525	+	protein_coding	KNOWN	DSG2	2	15	-0.155266	Decile 6	Vigintile 12	Expr 80-90%
ENSG00000046647.13	ENST00000332885.7,ENST00000380523.8,ENST00000398355.7,ENST00000460203.1,ENST00000477386.1	1135.03	914.92	454	18.49	15.56	454	0	17.7	15.65	15.9178	19.4811	0.0349311	14.1123	17.2643	0.0349903	chrX	14008279	14029893	14019086	-	protein_coding	KNOWN	GEMIN8	5	5	0.160924	Decile 8	Vigintile 16	Expr 60-70%
ENSG00000046651.14	ENST00000340096.10,ENST00000380550.6,ENST00000380567.5,ENST00000398395.7,ENST00000464463.5,ENST00000466534.1,ENST00000474705.1,ENST00000485052.5,ENST00000490265.5	2528.19	2308.08	708	11.43	9.62	708	0	11.68	10.32	9.89144	13.4479	0.0528544	8.7807	11.9237	0.0527735	chrX	13734745	13769353	13752049	+	protein_coding	KNOWN	OFD1	9	24	-0.05113	Decile 7	Vigintile 13	Expr 50-60%
ENSG00000046653.14	ENST00000316715.8,ENST00000355135.6,ENST00000356942.9,ENST00000398361.7,ENST00000454189.6,ENST00000468080.1,ENST00000472735.5,ENST00000475307.1,ENST00000493085.5,ENST00000493677.5,ENST00000495211.2	1405.95	1185.86	2986	93.81	78.95	2986	0	90.61	80.11	84.7691	96.3342	0.0218328	75.088	85.3079	0.0217893	chrX	13771031	13938638	13854834	-	protein_coding	KNOWN	GPM6B	11	9	-0.276202	Decile 5	Vigintile 10	Expr 92-93%
ENSG00000046774.9	ENST00000247452.3	1991	1770.89	0	0	0	0	0	0.02	0.02	5.74877e-09	0.0595024	0.657497	5.07674e-09	0.0526561	0.657383	chrX	142202345	142205290	142203817	-	protein_coding	KNOWN	MAGEC2	1	3	-0.29234	Decile 5	Vigintile 10	Non-expressed
ENSG00000046889.18	ENST00000288368.4,ENST00000517617.1,ENST00000520235.1,ENST00000522247.5,ENST00000529398.5	6968.85	6748.76	1663	9.18	7.73	1663	0	9.16	8.1	7.62303	10.8409	0.0616311	6.74441	9.59001	0.0615624	chr8	67952118	68237030	68094574	+	protein_coding	KNOWN	PREX2	5	40	-0.422591	Decile 4	Vigintile 8	Expr 50-60%
ENSG00000047056.14	ENST00000263150.8,ENST00000358220.5,ENST00000381329.5,ENST00000436154.1,ENST00000482165.1,ENST00000620998.4	4287.79	4067.67	652	5.97	5.03	652	0	6.01	5.32	5.42958	6.64649	0.0339767	4.79683	5.87194	0.0339747	chr10	1049538	1132297	1090917	+	protein_coding	KNOWN	WDR37	6	14	0.274478	Decile 8	Vigintile 16	Expr 40-50%
ENSG00000047188.15	ENST00000161863.8,ENST00000503857.5,ENST00000506333.1,ENST00000507567.1,ENST00000512600.1,ENST00000514720.1,ENST00000515883.5	4758.78	4538.67	916	7.52	6.33	916	0	7.65	6.77	6.40765	8.97694	0.059156	5.69557	7.96884	0.0590939	chr5	113513683	113595285	113554484	+	protein_coding	KNOWN	YTHDC2	7	30	-0.411482	Decile 4	Vigintile 8	Expr 40-50%
ENSG00000047230.14	ENST00000359276.8,ENST00000380241.7,ENST00000443824.5,ENST00000455276.1,ENST00000483053.1	3840.57	3620.46	1775	18.26	15.37	1775	0	17.56	15.53	16.6123	18.587	0.0192359	14.6804	16.4215	0.0191834	chrX	16588003	16712936	16650469	-	protein_coding	KNOWN	CTPS2	5	19	0.193089	Decile 8	Vigintile 16	Expr 60-70%
ENSG00000047249.16	ENST00000355221.7,ENST00000359530.6,ENST00000396774.6,ENST00000518072.1,ENST00000519588.1,ENST00000519922.1,ENST00000520188.5,ENST00000521275.5,ENST00000521335.1,ENST00000521377.5,ENST00000521707.1,ENST00000521900.5,ENST00000522159.5,ENST00000522849.1,ENST00000523343.1,ENST00000523426.1,ENST00000523899.5,ENST00000524164.5,ENST00000524234.1,ENST00000630578.1	1747.37	1527.27	1215	29.64	24.94	1215	0	81.45	72.02	28.3278	170.355	0.355792	25.3532	150.953	0.355727	chr8	53715557	53843558	53779557	-	protein_coding	KNOWN	ATP6V1H	20	14	-0.121768	Decile 7	Vigintile 13	Expr 70-80%
ENSG00000047315.14	ENST00000314595.5,ENST00000381227.5,ENST00000431623.6,ENST00000433463.1,ENST00000441246.6,ENST00000450656.5,ENST00000464918.1,ENST00000478188.5,ENST00000484821.1,ENST00000495311.1,ENST00000497845.1,ENST00000510355.1	3115.56	2895.46	5388.37	69.33	58.35	5388.25	0.89	66.71	58.98	62.4514	71.0377	0.0224026	55.3052	62.8918	0.0223326	chr4	56977722	57031168	57004445	+	protein_coding	KNOWN	POLR2B	12	26	-0.171792	Decile 6	Vigintile 12	Expr 80-90%
ENSG00000047346.12	ENST00000261844.11,ENST00000399202.8,ENST00000534964.6,ENST00000546305.6,ENST00000561490.5,ENST00000561543.5,ENST00000562135.5,ENST00000562351.2,ENST00000566768.5,ENST00000566948.5,ENST00000568637.5,ENST00000568668.1,ENST00000568863.1,ENST00000568871.1,ENST00000570204.1,ENST00000619572.4	1950.73	1730.64	228	4.91	4.13	228	0	6.11	5.4	4.76503	7.61002	0.0804556	4.21221	6.72828	0.0804729	chr15	52581317	52709817	52645567	-	protein_coding	KNOWN	FAM214A	16	13	-0.384987	Decile 4	Vigintile 8	Expr 40-50%
ENSG00000047365.11	ENST00000303965.8,ENST00000503225.5,ENST00000503904.1,ENST00000505837.1,ENST00000506189.1,ENST00000508066.1,ENST00000511416.1,ENST00000512804.1,ENST00000513032.2,ENST00000618163.1	5157.02	4936.92	39	0.29	0.25	39	0	5.48	4.84	0.54498	14.7032	0.528279	0.491338	13.0102	0.528356	chr4	35948221	36244509	36096365	-	protein_coding	KNOWN	ARAP2	10	33	-0.731537	Decile 1	Vigintile 2	Expr 10-20%
ENSG00000047410.13	ENST00000367478.8,ENST00000451586.1,ENST00000467810.1,ENST00000469463.1,ENST00000474852.1,ENST00000481347.1,ENST00000491783.5,ENST00000492973.1,ENST00000613151.1	6044.78	5824.69	8439	53.97	45.43	8439	0	51.93	45.92	47.2586	56.4368	0.0305691	41.9202	50.0314	0.030603	chr1	186311652	186375693	186343672	-	protein_coding	KNOWN	TPR	9	51	-0.385528	Decile 4	Vigintile 8	Expr 80-90%
ENSG00000047457.13	ENST00000264613.10,ENST00000455472.3,ENST00000460674.5,ENST00000462336.5,ENST00000463556.5,ENST00000471356.1,ENST00000473296.1,ENST00000474204.1,ENST00000479771.5,ENST00000481169.5,ENST00000489736.5,ENST00000490639.5,ENST00000494544.1,ENST00000497797.5,ENST00000497902.5	1310.57	1090.49	17.1	0.58	0.49	17.21	0.47	1.43	1.26	0.782174	2.11428	0.164652	0.691563	1.87008	0.164531	chr3	149162410	149222055	149192232	-	protein_coding	KNOWN	CP	15	19	-0.373068	Decile 5	Vigintile 9	Expr 10-20%
ENSG00000047578.12	ENST00000261588.8,ENST00000562207.1,ENST00000564749.5,ENST00000565672.5,ENST00000566023.1,ENST00000567894.5,ENST00000568258.5,ENST00000568622.1,ENST00000573850.1,ENST00000618117.1	3243.86	3023.79	899.98	11.09	9.33	899.91	0.28	11.84	10.46	9.50191	14.3972	0.0713427	8.35804	12.6894	0.0713227	chr16	27550133	27780369	27665251	+	protein_coding	KNOWN	KIAA0556	10	28	0.689687	Decile 10	Vigintile 19	Expr 50-60%
ENSG00000047579.19	ENST00000338950.9,ENST00000344537.9,ENST00000355917.7,ENST00000462989.6,ENST00000506844.1,ENST00000509674.1,ENST00000510395.5,ENST00000511762.2,ENST00000513680.5,ENST00000514651.1,ENST00000515875.5,ENST00000622898.4	1416.76	1196.65	302	9.4	7.91	302	0	10.17	8.99	8.70401	11.7994	0.0522395	7.68369	10.4187	0.0522567	chr6	15522801	15663058	15592929	-	protein_coding	KNOWN	DTNBP1	12	11	-0.082816	Decile 7	Vigintile 13	Expr 50-60%
ENSG00000047597.5	ENST00000378616.3	5206	4985.89	32	0.24	0.2	32	0	0.23	0.21	0.1567	0.314335	0.117428	0.138552	0.277992	0.11761	chrX	37685759	37732130	37708944	+	protein_coding	KNOWN	XK	1	3	-0.262279	Decile 5	Vigintile 10	Expr 10-20%
ENSG00000047617.14	ENST00000327087.12,ENST00000356134.9,ENST00000536751.1,ENST00000538154.5,ENST00000540543.1,ENST00000541487.1,ENST00000541874.1,ENST00000542326.5,ENST00000544988.1,ENST00000545860.1,ENST00000546188.5,ENST00000612575.1	2076.04	1855.96	108	2.17	1.82	108	0	3.02	2.67	2.06513	3.98262	0.111305	1.82859	3.52431	0.111218	chr12	5531869	5946232	5739050	-	protein_coding	KNOWN	ANO2	12	27	0.357702	Decile 9	Vigintile 17	Expr 20-30%
ENSG00000047621.11	ENST00000261250.7,ENST00000509318.2,ENST00000535030.1,ENST00000535887.1,ENST00000541014.5,ENST00000542080.5,ENST00000544258.1,ENST00000544697.1,ENST00000545746.5	2454.86	2234.77	231	3.85	3.24	231	0	4.67	4.13	3.54953	5.86494	0.0866995	3.1114	5.15868	0.0867215	chr12	4487728	4538508	4513118	-	protein_coding	KNOWN	C12orf4	9	14	0.104258	Decile 8	Vigintile 15	Expr 30-40%
ENSG00000047634.14	ENST00000380041.7,ENST00000380043.7,ENST00000380045.7,ENST00000398080.5,ENST00000419185.1,ENST00000427362.2,ENST00000487842.1	2361.89	2141.78	48	0.83	0.7	48	0	0.96	0.85	0.647156	1.27649	0.112997	0.576998	1.13357	0.112966	chrX	17737449	17754988	17746218	+	protein_coding	KNOWN	SCML1	7	8	-0.289486	Decile 5	Vigintile 10	Expr 20-30%
ENSG00000047644.17	ENST00000380861.8,ENST00000454666.2,ENST00000466248.1	5817.85	5597.75	2390	15.91	13.39	2390	0	15.2	13.44	14.1076	16.3027	0.0246531	12.5077	14.4467	0.0246407	chrX	10015562	10144478	10080020	+	protein_coding	KNOWN	WWC3	3	24	0.188123	Decile 8	Vigintile 16	Expr 60-70%
ENSG00000047648.21	ENST00000303025.10,ENST00000337414.8,ENST00000380717.7,ENST00000380718.1,ENST00000380736.5,ENST00000489330.6,ENST00000491514.1,ENST00000495242.5	2837.2	2617.08	25	0.36	0.3	25	0	0.47	0.41	0.238601	0.721726	0.180151	0.212579	0.640319	0.180231	chrX	11137543	11665701	11401622	-	protein_coding	KNOWN	ARHGAP6	8	15	-0.525279	Decile 3	Vigintile 6	Expr 10-20%
ENSG00000047662.4	ENST00000265018.3	6622	6401.89	25.21	0.15	0.12	25.26	1.92	0.14	0.13	0.0877904	0.204124	0.139605	0.078214	0.181182	0.139566	chr4	17629306	17781512	17705409	-	protein_coding	KNOWN	FAM184B	1	18	-0.277218	Decile 5	Vigintile 10	Expr 0-10%
ENSG00000047849.21	ENST00000335271.9,ENST00000360240.10,ENST00000383736.3,ENST00000395734.7,ENST00000420772.6,ENST00000423088.5,ENST00000426837.6,ENST00000429422.5,ENST00000434267.5,ENST00000439356.2,ENST00000462206.1,ENST00000468075.2,ENST00000477765.1,ENST00000482752.1,ENST00000497735.1,ENST00000633710.1	4777.35	4557.24	11738	95.95	80.76	11738	0	92.15	81.48	89.2021	95.4323	0.0114557	78.9779	84.4575	0.0114574	chr3	47850690	48089272	47969981	-	protein_coding	KNOWN	MAP4	16	21	0.903543	Decile 10	Vigintile 19	Expr 92-93%
ENSG00000047932.13	ENST00000052569.10,ENST00000368498.6,ENST00000535237.2	4586.03	4365.91	890	7.59	6.39	886.49	3.81	7.19	6.36	6.71139	7.66506	0.0229762	5.94295	6.78694	0.0229724	chr6	117560269	117602542	117581405	-	protein_coding	KNOWN	GOPC	3	9	-0.429028	Decile 4	Vigintile 8	Expr 40-50%
ENSG00000047936.10	ENST00000368507.7,ENST00000368508.7,ENST00000403284.2	5177.67	4957.56	0	0	0	0	0	0.09	0.08	0.00152999	0.238759	0.56593	0.00141149	0.211248	0.565973	chr6	117288300	117425855	117357077	-	protein_coding	KNOWN	ROS1	3	44	-0.604239	Decile 2	Vigintile 4	Non-expressed
ENSG00000048028.11	ENST00000003302.8,ENST00000535607.5,ENST00000537490.1,ENST00000537642.1,ENST00000537706.5,ENST00000538224.1,ENST00000538475.5,ENST00000540438.5,ENST00000540925.5,ENST00000542033.5,ENST00000544272.1,ENST00000544750.1,ENST00000544967.5,ENST00000545540.5,ENST00000545608.5	2260.04	2039.94	3723	67.99	57.22	3723	0	65.49	57.9	60.6529	70.5437	0.0264371	53.5709	62.3217	0.0264282	chr11	113797874	113875570	113836722	-	protein_coding	KNOWN	USP28	15	25	0.166617	Decile 8	Vigintile 16	Expr 80-90%
ENSG00000048052.21	ENST00000401921.5,ENST00000405010.7,ENST00000406072.5,ENST00000406451.8,ENST00000411993.1,ENST00000413380.5,ENST00000413509.6,ENST00000417496.6,ENST00000425071.5,ENST00000428307.6,ENST00000430454.5,ENST00000432645.6,ENST00000433709.6,ENST00000441542.6,ENST00000441986.5,ENST00000446646.1,ENST00000455069.1,ENST00000456174.6,ENST00000461159.6,ENST00000461409.1,ENST00000471887.1,ENST00000474742.1,ENS…	2261.37	2041.26	659	12.03	10.12	659	0	13.55	11.98	11.7047	15.3848	0.0465424	10.368	13.6237	0.0465496	chr7	18086949	19002416	18544682	+	protein_coding	KNOWN	HDAC9	29	26	-0.572175	Decile 3	Vigintile 5	Expr 50-60%
ENSG00000048140.17	ENST00000298564.14,ENST00000310032.12,ENST00000503030.1,ENST00000503045.5,ENST00000504168.5,ENST00000507471.1,ENST00000508164.5,ENST00000514705.5,ENST00000515708.5	2332.62	2112.51	2058	36.29	30.55	2058	0	34.74	30.72	32.8448	36.7726	0.0194695	29.0329	32.4989	0.0194497	chr5	176647387	176659054	176653220	+	protein_coding	KNOWN	TSPAN17	9	9	1.42732	Decile 10	Vigintile 20	Expr 80-90%
ENSG00000048162.19	ENST00000502577.1,ENST00000502663.5,ENST00000503849.5,ENST00000504821.1,ENST00000509257.1,ENST00000510608.1,ENST00000613081.4,ENST00000614830.4,ENST00000616685.1,ENST00000618911.4,ENST00000619979.4,ENST00000621444.4	1068.64	848.54	1466.33	64.38	54.18	1465.69	3.91	62	54.82	57.2362	66.9635	0.0276335	50.6703	59.2683	0.0275722	chr5	176383938	176388975	176386456	-	protein_coding	KNOWN	NOP16	12	8	0.802736	Decile 10	Vigintile 19	Expr 80-90%
ENSG00000048342.15	ENST00000389652.9,ENST00000424120.5,ENST00000438599.6,ENST00000503292.5,ENST00000503658.2,ENST00000506643.4,ENST00000507954.5,ENST00000510220.1,ENST00000511544.5,ENST00000512202.1,ENST00000512702.5,ENST00000513035.1,ENST00000513811.5,ENST00000514039.5,ENST00000514450.2,ENST00000515124.5,ENST00000634028.1	3113.82	2893.73	545	7.02	5.91	545	0	8.47	7.49	6.75966	10.4077	0.0757762	5.98022	9.20533	0.0758119	chr4	15469865	15601557	15535711	+	protein_coding	KNOWN	CC2D2A	17	38	-0.284426	Decile 5	Vigintile 10	Expr 40-50%
ENSG00000048392.11	ENST00000251810.7,ENST00000395910.6,ENST00000395912.6,ENST00000517517.1,ENST00000519125.1,ENST00000519317.5,ENST00000519962.5,ENST00000522368.5,ENST00000522394.1,ENST00000523957.1,ENST00000621845.1	3305.15	3085.04	1723.99	20.82	17.52	1723.99	0.09	29.76	26.31	20.1159	43.4819	0.131575	17.8255	38.498	0.131571	chr8	102204502	102239118	102221810	-	protein_coding	KNOWN	RRM2B	11	11	-0.013948	Decile 7	Vigintile 14	Expr 60-70%
ENSG00000048405.9	ENST00000265827.7,ENST00000393312.5,ENST00000393313.5,ENST00000434602.5,ENST00000436992.5,ENST00000439506.1,ENST00000485577.1,ENST00000619291.4	1966.86	1746.81	81	1.73	1.45	81	0	2.11	1.87	1.24917	3.11171	0.158039	1.10782	2.75562	0.158159	chr7	127346790	127431924	127389357	-	protein_coding	KNOWN	ZNF800	8	6	-0.544109	Decile 3	Vigintile 5	Expr 20-30%
ENSG00000048462.10	ENST00000053243.5,ENST00000396495.3,ENST00000562385.1	724.33	504.26	0	0	0	0	0	0.25	0.22	0.0244103	0.545046	0.404471	0.0217976	0.482305	0.404568	chr16	11965107	11968068	11966587	+	protein_coding	KNOWN	TNFRSF17	3	4	0.512452	Decile 9	Vigintile 18	Non-expressed
ENSG00000048471.13	ENST00000562510.1,ENST00000563308.1,ENST00000564111.5,ENST00000564791.5,ENST00000566228.5,ENST00000568359.1,ENST00000568949.1,ENST00000569801.5	7635.61	7415.5	422.94	2.12	1.79	422.92	0.28	2.91	2.58	2.18504	3.77316	0.0955175	1.91792	3.32369	0.0955304	chr16	11976737	12574289	12275513	+	protein_coding	KNOWN	SNX29	8	21	0.390813	Decile 9	Vigintile 17	Expr 20-30%
ENSG00000048540.14	ENST00000261169.10,ENST00000320122.10,ENST00000332914.10,ENST00000354662.5,ENST00000396205.6,ENST00000424192.6,ENST00000439600.2,ENST00000441439.6,ENST00000447609.5,ENST00000453727.6,ENST00000534946.5,ENST00000535535.5,ENST00000536172.5,ENST00000536509.5,ENST00000537304.5,ENST00000537568.1,ENST00000537757.5,ENST00000538020.1,ENST00000538051.5,ENST00000539232.1,ENST00000539534.5,ENST00000540445.5,…	1607.9	1387.81	116	3.11	2.62	116	0	5.16	4.56	3.90295	6.49953	0.0878729	3.4545	5.75034	0.0878734	chr12	16548373	16610594	16579483	-	protein_coding	KNOWN	LMO3	35	7	-0.366548	Decile 5	Vigintile 9	Expr 30-40%
ENSG00000048544.5	ENST00000053468.3	2110	1889.89	746	14.71	12.38	746	0	13.93	12.32	12.9411	14.9215	0.0245673	11.4399	13.1923	0.0245038	chr6	42206801	42217865	42212333	-	protein_coding	KNOWN	MRPS10	1	7	0.552323	Decile 9	Vigintile 18	Expr 60-70%
ENSG00000048545.13	ENST00000053469.8,ENST00000372958.1,ENST00000394237.5,ENST00000418175.5,ENST00000541991.5	1586.02	1365.91	206	5.62	4.73	206	0	5.42	4.8	4.69034	6.17157	0.0467651	4.13363	5.44373	0.0466911	chr6	42155406	42180056	42167731	+	protein_coding	KNOWN	GUCA1A	5	7	0.876906	Decile 10	Vigintile 19	Expr 40-50%
ENSG00000048649.13	ENST00000308488.10,ENST00000440064.2,ENST00000467567.1,ENST00000480887.5,ENST00000526324.5,ENST00000528095.5,ENST00000529470.1,ENST00000530604.1,ENST00000531026.5,ENST00000531768.1,ENST00000532556.1,ENST00000534794.1	2515.06	2295.01	2560.18	41.56	34.98	2560.51	1.82	41.22	36.45	36.0563	46.3881	0.0421408	32.0744	41.2001	0.0422378	chr11	77659996	77821017	77740506	-	protein_coding	KNOWN	RSF1	12	16	0.049623	Decile 8	Vigintile 15	Expr 80-90%
ENSG00000048707.13	ENST00000011700.10,ENST00000460333.5,ENST00000466732.2,ENST00000469054.1,ENST00000473099.1,ENST00000476045.5,ENST00000476169.1,ENST00000481484.1,ENST00000487188.1,ENST00000489961.1,ENST00000543710.5,ENST00000543766.2,ENST00000613099.4,ENST00000620676.4	9822.05	9601.93	2319	9	7.57	2319	0	10.82	9.57	9.17443	12.7034	0.0574565	8.12447	11.2447	0.0573957	chr1	12230067	12512047	12371057	+	protein_coding	KNOWN	VPS13D	14	70	0.479489	Decile 9	Vigintile 18	Expr 50-60%
ENSG00000048740.17	ENST00000354897.3,ENST00000399850.7,ENST00000416382.6,ENST00000417956.6,ENST00000542579.5,ENST00000608830.5,ENST00000609692.5,ENST00000609870.5,ENST00000631460.1,ENST00000631816.1,ENST00000632065.1,ENST00000632728.1,ENST00000633077.1,ENST00000633200.1	3916.27	3696.16	1220.06	12.3	10.35	1220.06	0.24	11.97	10.58	10.9294	12.9773	0.029568	9.6675	11.4802	0.0295901	chr10	11005321	11336675	11170998	+	protein_coding	KNOWN	CELF2	14	14	-0.329617	Decile 5	Vigintile 9	Expr 50-60%
ENSG00000048828.16	ENST00000277165.10,ENST00000375389.7,ENST00000427765.1,ENST00000446420.2,ENST00000475933.1	3911.86	3691.74	2305.26	23.26	19.58	2304.93	4.57	22.14	19.57	20.0105	24.0823	0.0309368	17.7569	21.3596	0.0309342	chr9	93451722	93566107	93508914	+	protein_coding	KNOWN	FAM120A	5	18	0.260229	Decile 8	Vigintile 16	Expr 70-80%
ENSG00000048991.16	ENST00000264160.8,ENST00000409478.5,ENST00000409606.5,ENST00000410054.5,ENST00000425804.1,ENST00000429703.6,ENST00000436436.5,ENST00000438014.5,ENST00000441871.5,ENST00000443537.2,ENST00000445855.1,ENST00000456040.1,ENST00000463230.5,ENST00000480793.1,ENST00000483021.5,ENST00000483065.1,ENST00000486532.5,ENST00000487294.1,ENST00000488035.5,ENST00000628915.2	2531.62	2311.54	2230	35.94	30.25	2230	0	37.76	33.39	33.0047	42.9112	0.0424693	29.2198	37.9816	0.0424423	chr2	135531455	135725270	135628362	+	protein_coding	KNOWN	R3HDM1	20	26	-0.298085	Decile 5	Vigintile 10	Expr 80-90%
ENSG00000049089.13	ENST00000372736.3,ENST00000372748.7,ENST00000417105.5,ENST00000427563.1,ENST00000461118.5,ENST00000466267.1,ENST00000482722.5,ENST00000488463.5,ENST00000490132.1,ENST00000495948.1,ENST00000496215.5	2469.53	2249.42	176	2.91	2.45	176	0	3.99	3.53	2.9812	5.07575	0.0896857	2.63897	4.4918	0.089662	chr1	40300487	40317816	40309151	-	protein_coding	KNOWN	COL9A2	11	32	0.435534	Decile 9	Vigintile 17	Expr 30-40%
ENSG00000049130.13	ENST00000228280.9,ENST00000347404.9,ENST00000357116.4,ENST00000378535.4,ENST00000552044.1,ENST00000613305.1	2733.29	2513.18	327	4.85	4.08	327	0	4.87	4.3	4.17668	5.58525	0.0495776	3.6953	4.94145	0.0495276	chr12	88492793	88580851	88536822	-	protein_coding	KNOWN	KITLG	6	10	-0.686883	Decile 2	Vigintile 3	Expr 40-50%
ENSG00000049167.13	ENST00000265038.9,ENST00000381118.7,ENST00000439176.5,ENST00000462279.5,ENST00000477893.1,ENST00000484330.5,ENST00000495985.5,ENST00000497892.5	1533.07	1312.96	384.65	10.91	9.19	385.43	5.77	11.01	9.74	9.36412	12.6842	0.0522522	8.30492	11.2383	0.0523229	chr5	60873831	60945073	60909452	-	protein_coding	KNOWN	ERCC8	8	13	-0.542784	Decile 3	Vigintile 5	Expr 50-60%
ENSG00000049192.14	ENST00000314351.9,ENST00000381052.8,ENST00000381055.7,ENST00000417396.2,ENST00000464680.6,ENST00000470597.5,ENST00000502886.1,ENST00000504282.1	6422.67	6202.56	61	0.37	0.31	61	0	0.96	0.85	0.443372	1.64061	0.218866	0.39114	1.44993	0.218924	chr5	65148736	65481920	65315328	-	protein_coding	KNOWN	ADAMTS6	8	26	-0.614314	Decile 2	Vigintile 4	Expr 10-20%
ENSG00000049239.12	ENST00000377403.6,ENST00000495451.1,ENST00000602477.1	9146	8925.89	640	2.67	2.25	640	0	2.59	2.29	2.3736	2.80374	0.0283545	2.10038	2.48045	0.0283665	chr1	9234775	9271337	9253056	+	protein_coding	KNOWN	H6PD	3	5	0.787637	Decile 10	Vigintile 19	Expr 30-40%
ENSG00000049245.12	ENST00000054666.10,ENST00000470357.1,ENST00000487194.1	2052.03	1831.93	946	19.24	16.19	946	0	18.99	16.79	16.9542	21.4192	0.0385548	14.9948	18.9434	0.0385356	chr1	7771269	7781432	7776350	+	protein_coding	KNOWN	VAMP3	3	5	0.202652	Decile 8	Vigintile 16	Expr 60-70%
ENSG00000049246.14	ENST00000361923.2,ENST00000377532.7,ENST00000377541.5,ENST00000463106.1,ENST00000473653.1,ENST00000494684.1,ENST00000602883.1,ENST00000613533.4,ENST00000614998.4	4669.2	4449.1	381.87	3.2	2.69	381.13	1.13	3.55	3.14	2.83432	4.34707	0.0738618	2.50616	3.84294	0.073786	chr1	7784320	7845177	7814748	+	protein_coding	KNOWN	PER3	9	23	0.447971	Decile 9	Vigintile 17	Expr 30-40%
ENSG00000049247.13	ENST00000054668.5,ENST00000361696.9,ENST00000377516.6	860	639.96	0	0	0	0.67	1.05	0.32	0.29	0.022426	0.73346	0.42328	0.0202261	0.649212	0.423165	chr1	7843083	7853512	7848297	-	protein_coding	KNOWN	UTS2	3	7	0.471502	Decile 9	Vigintile 18	Non-expressed
ENSG00000049249.8	ENST00000377507.7,ENST00000474475.1,ENST00000492571.1,ENST00000615230.4	2230.5	2010.44	0	0	0	0	0	0.28	0.25	0.0196547	0.646292	0.430344	0.0179599	0.572181	0.430612	chr1	7915894	7943165	7929529	-	protein_coding	KNOWN	TNFRSF9	4	9	0.252935	Decile 8	Vigintile 16	Non-expressed
ENSG00000049283.17	ENST00000268933.7,ENST00000503246.1,ENST00000503690.5,ENST00000504857.1,ENST00000507467.1,ENST00000507709.1,ENST00000507998.5,ENST00000510045.5,ENST00000510462.5,ENST00000511414.5,ENST00000512291.5,ENST00000512379.5,ENST00000514874.5,ENST00000515028.5,ENST00000515126.1,ENST00000537145.2,ENST00000571402.1,ENST00000574464.5	1978.98	1758.87	288	6.1	5.13	287.17	1.07	7.47	6.6	5.95509	9.14767	0.072456	5.26095	8.08558	0.0724998	chr17	50532543	50543750	50538146	+	protein_coding	KNOWN	EPN3	18	10	0.951785	Decile 10	Vigintile 19	Expr 40-50%
ENSG00000049323.15	ENST00000402934.5,ENST00000404525.5,ENST00000404816.6,ENST00000407925.5,ENST00000413303.5,ENST00000415140.6,ENST00000418533.6,ENST00000422669.1,ENST00000432635.1,ENST00000468091.2,ENST00000489740.1,ENST00000498013.1	4564.91	4344.8	2072.86	17.77	14.96	2072.84	0.37	18.07	15.97	16.2044	19.8785	0.0351036	14.3994	17.6483	0.0350525	chr2	32946972	33399509	33173240	+	protein_coding	KNOWN	LTBP1	12	34	-0.246722	Decile 6	Vigintile 11	Expr 60-70%
ENSG00000049449.8	ENST00000054950.3,ENST00000506388.2,ENST00000527337.1,ENST00000528630.1,ENST00000530146.1,ENST00000530348.5,ENST00000531345.1,ENST00000532474.5,ENST00000532721.1,ENST00000532942.5,ENST00000533898.5	2346.18	2126.06	4226.1	74.05	62.33	4226.1	5.37	71.72	63.41	68.1691	75.3136	0.0172001	60.2806	66.5863	0.01711	chr11	31812391	32105755	31959073	+	protein_coding	KNOWN	RCN1	11	6	-0.175726	Decile 6	Vigintile 12	Expr 90-91%
ENSG00000049540.16	ENST00000252034.11,ENST00000320399.10,ENST00000320492.11,ENST00000357036.9,ENST00000358929.8,ENST00000380553.8,ENST00000380562.8,ENST00000380575.8,ENST00000380576.9,ENST00000380584.8,ENST00000414324.5,ENST00000416107.5,ENST00000417091.5,ENST00000419398.1,ENST00000428787.5,ENST00000429192.5,ENST00000431562.5,ENST00000438880.5,ENST00000438906.5,ENST00000442310.5,ENST00000445912.5,ENST00000458204.5,…	2577.53	2357.43	192	3.03	2.55	192	0	4.99	4.41	3.92853	6.15641	0.0771851	3.48334	5.45178	0.0771988	chr7	74027789	74069907	74048848	+	protein_coding	KNOWN	ELN	34	34	0.967466	Decile 10	Vigintile 19	Expr 30-40%
ENSG00000049541.10	ENST00000055077.7,ENST00000352131.7,ENST00000463194.1,ENST00000470266.5,ENST00000473493.2,ENST00000479105.6,ENST00000480432.5,ENST00000485545.5,ENST00000491206.5,ENST00000493156.6,ENST00000494019.5,ENST00000497430.1,ENST00000621097.4	1462.22	1242.11	2079	62.35	52.48	2079	0	60.84	53.8	57.3492	64.513	0.0204771	50.6915	57.018	0.0204835	chr7	74231499	74254458	74242978	-	protein_coding	KNOWN	RFC2	13	11	1.12626	Decile 10	Vigintile 20	Expr 80-90%
ENSG00000049618.21	ENST00000319584.10,ENST00000346085.9,ENST00000350026.9,ENST00000400790.3,ENST00000414678.6,ENST00000452544.1,ENST00000478761.3,ENST00000493658.1,ENST00000494260.1	6827.94	6607.83	4608.97	25.98	21.87	4608.97	0.18	24.98	22.09	24.0144	25.9736	0.0134247	21.2509	22.9807	0.0133838	chr6	156777374	157210779	156994076	+	protein_coding	KNOWN	ARID1B	9	20	-0.157911	Decile 6	Vigintile 12	Expr 70-80%
ENSG00000049656.13	ENST00000320895.9,ENST00000503042.5,ENST00000503151.5,ENST00000503534.5,ENST00000505605.5,ENST00000505914.5,ENST00000506641.5,ENST00000507195.5,ENST00000507807.3,ENST00000508765.5,ENST00000511268.6,ENST00000511786.1,ENST00000512451.5,ENST00000513250.1,ENST00000515719.5,ENST00000630539.1	1759.6	1539.53	3505	84.81	71.38	3505	0	82.83	73.24	74.8666	91.0015	0.0327711	66.0979	80.3783	0.0327506	chr5	1317744	1345099	1331421	-	protein_coding	KNOWN	CLPTM1L	16	17	1.14019	Decile 10	Vigintile 20	Expr 91-92%
ENSG00000049759.16	ENST00000256830.13,ENST00000356462.10,ENST00000357895.9,ENST00000382850.8,ENST00000400345.7,ENST00000431212.6,ENST00000435432.6,ENST00000456173.6,ENST00000456986.5,ENST00000585323.5,ENST00000585363.5,ENST00000585594.5,ENST00000585970.1,ENST00000586263.5,ENST00000586268.5,ENST00000587190.5,ENST00000587246.1,ENST00000587547.1,ENST00000587634.5,ENST00000587881.1,ENST00000588066.5,ENST00000588494.5,E…	2718.31	2498.21	2836.42	42.3	35.6	2832.72	7.33	101.88	90.08	48.1673	177.154	0.23408	42.9771	157.159	0.234146	chr18	58044367	58401540	58222953	+	protein_coding	KNOWN	NEDD4L	37	31	0.11527	Decile 8	Vigintile 15	Expr 80-90%
ENSG00000049768.14	ENST00000376197.1,ENST00000376199.6,ENST00000376207.8,ENST00000455775.6,ENST00000518685.5,ENST00000557224.5	2333.58	2113.46	16	0.28	0.24	16	0	0.42	0.37	0.247314	0.614847	0.151249	0.218504	0.543603	0.151316	chrX	49250436	49264826	49257631	-	protein_coding	KNOWN	FOXP3	6	12	1.13293	Decile 10	Vigintile 20	Expr 10-20%
ENSG00000049769.12	ENST00000055335.10,ENST00000376188.1,ENST00000466508.5,ENST00000471261.2,ENST00000495799.5	2817.38	2597.27	274	3.93	3.31	274	0	4.3	3.81	3.48192	5.28094	0.0708485	3.08235	4.67298	0.0707825	chrX	49269843	49301461	49285652	+	protein_coding	KNOWN	PPP1R3F	5	5	0.823407	Decile 10	Vigintile 19	Expr 30-40%
ENSG00000049860.13	ENST00000261416.11,ENST00000503312.5,ENST00000504459.5,ENST00000505859.1,ENST00000509579.1,ENST00000510820.1,ENST00000511181.5,ENST00000511621.1,ENST00000513079.5,ENST00000513336.5,ENST00000513539.1,ENST00000513867.1,ENST00000515528.1	1210.17	990.08	1110.22	41.77	35.16	1110.23	0.47	41.14	36.37	37.1825	45.0769	0.0331159	32.8863	39.8618	0.0331292	chr5	74640023	74722647	74681335	+	protein_coding	KNOWN	HEXB	13	14	-0.034887	Decile 7	Vigintile 14	Expr 80-90%
ENSG00000049883.14	ENST00000308077.9,ENST00000380639.9,ENST00000460837.2,ENST00000486995.5,ENST00000493283.5,ENST00000503315.5,ENST00000503868.5,ENST00000510676.6,ENST00000511752.5,ENST00000515198.5,ENST00000536805.5,ENST00000543322.5	3169.97	2949.86	491	6.2	5.22	491	0	6.38	5.64	5.39572	7.39605	0.0537629	4.77996	6.54967	0.0537747	chr5	72320367	72368395	72344381	+	protein_coding	KNOWN	PTCD2	12	11	0.022181	Decile 7	Vigintile 14	Expr 40-50%
ENSG00000050030.13	ENST00000055682.10,ENST00000424929.1,ENST00000616200.1	11719	11498.9	50	0.16	0.14	50	0	0.28	0.25	0.126939	0.535984	0.251834	0.112866	0.474617	0.251802	chrX	74732849	74925485	74829167	-	protein_coding	KNOWN	KIAA2022	3	5	-0.321505	Decile 5	Vigintile 10	Expr 0-10%
ENSG00000050130.17	ENST00000261247.13,ENST00000356057.9,ENST00000425728.6,ENST00000553156.2,ENST00000553647.1,ENST00000553941.5,ENST00000554271.5,ENST00000554721.1,ENST00000554754.5,ENST00000554795.1,ENST00000555491.5,ENST00000556985.5,ENST00000557560.5,ENST00000602482.5,ENST00000616435.4	1298.76	1078.67	791	27.32	22.99	790.98	0.13	26.87	23.76	23.981	29.8464	0.0377091	21.2115	26.3978	0.0376717	chr14	59484443	59505410	59494926	+	protein_coding	KNOWN	JKAMP	15	8	-0.137132	Decile 6	Vigintile 12	Expr 70-80%
ENSG00000050165.17	ENST00000326932.8,ENST00000396505.6,ENST00000525493.5,ENST00000525927.5,ENST00000526218.5,ENST00000527132.1,ENST00000528188.5,ENST00000529338.1,ENST00000530694.5,ENST00000531309.1,ENST00000532372.5,ENST00000532873.5,ENST00000533813.5,ENST00000533900.1,ENST00000534479.5,ENST00000534511.5	1731.58	1511.49	815	20.09	16.91	815	0	20.78	18.37	17.6439	23.8043	0.05048	15.6694	21.1201	0.0505602	chr11	11963106	12009769	11986437	-	protein_coding	KNOWN	DKK3	16	8	0.488457	Decile 9	Vigintile 18	Expr 60-70%
ENSG00000050327.14	ENST00000056217.9,ENST00000471847.2,ENST00000474817.5,ENST00000498580.5	3963.59	3743.48	1449.63	14.43	12.14	1448.79	30.61	13.76	12.17	12.5873	14.9772	0.0302051	11.1266	13.2397	0.0301398	chr7	144355288	144380632	144367960	+	protein_coding	KNOWN	ARHGEF5	4	15	0.323086	Decile 9	Vigintile 17	Expr 60-70%
ENSG00000050344.8	ENST00000056233.3,ENST00000606261.1,ENST00000607375.1	3272.8	3052.7	2174	26.53	22.33	2174	0	25.64	22.67	23.868	27.488	0.023303	21.1223	24.3162	0.0232854	chr7	26152240	26187125	26169682	+	protein_coding	KNOWN	NFE2L3	3	4	0.594559	Decile 9	Vigintile 18	Expr 70-80%
ENSG00000050393.11	ENST00000379170.8,ENST00000488770.1,ENST00000607303.1	4477.42	4257.31	1028	9	7.57	1028	0	8.76	7.75	7.5027	10.1202	0.0526034	6.63532	8.95208	0.0526072	chr6	13786557	13814568	13800562	-	protein_coding	KNOWN	MCUR1	3	10	0.212405	Decile 8	Vigintile 16	Expr 50-60%
ENSG00000050405.13	ENST00000341247.8,ENST00000394943.7,ENST00000547825.5,ENST00000549064.1,ENST00000550592.1,ENST00000550611.1,ENST00000551486.1,ENST00000551691.5,ENST00000552008.5,ENST00000552045.1,ENST00000552338.5,ENST00000552491.5,ENST00000552720.5,ENST00000552783.5,ENST00000552823.5,ENST00000552909.5	3317.3	3097.18	1593.92	19.17	16.14	1593.92	0.27	19.71	17.43	18.2249	21.277	0.0264222	16.106	18.8062	0.0263883	chr12	50175788	50283546	50229667	-	protein_coding	KNOWN	LIMA1	16	12	0.644004	Decile 9	Vigintile 18	Expr 60-70%
ENSG00000050426.15	ENST00000262055.8,ENST00000380135.7,ENST00000418425.6,ENST00000546814.1,ENST00000546992.5,ENST00000547008.5,ENST00000547029.5,ENST00000547256.1,ENST00000547318.5,ENST00000547555.5,ENST00000547660.5,ENST00000547877.5,ENST00000548209.5,ENST00000548251.5,ENST00000548390.5,ENST00000548401.1,ENST00000548516.5,ENST00000549340.5,ENST00000549395.1,ENST00000549686.5,ENST00000550100.5,ENST00000550274.1,ENS…	1396.14	1176.05	1425	45.14	37.99	1425	0	47.29	41.81	43.4901	51.2115	0.0285773	38.4894	45.317	0.0285966	chr12	51047962	51060424	51054193	+	protein_coding	KNOWN	LETMD1	38	9	0.753062	Decile 10	Vigintile 19	Expr 80-90%
ENSG00000050438.16	ENST00000319957.10,ENST00000358657.7,ENST00000453097.6,ENST00000514353.7,ENST00000535225.6,ENST00000546497.1,ENST00000546663.1,ENST00000546872.1,ENST00000546875.1,ENST00000547697.6,ENST00000548352.5,ENST00000548616.1,ENST00000548811.5,ENST00000550211.1,ENST00000551071.5,ENST00000552001.1,ENST00000604314.5,ENST00000615370.1	5947.08	5726.96	633	4.12	3.47	633	0	18.75	16.58	5.04636	42.4217	0.388683	4.46419	37.5349	0.388851	chr12	51391317	51515763	51453540	+	protein_coding	KNOWN	SLC4A8	18	25	0.374449	Decile 9	Vigintile 17	Expr 30-40%
ENSG00000050555.17	ENST00000355452.5,ENST00000361069.8,ENST00000462567.1,ENST00000480883.1	3347.27	3127.16	764	9.1	7.66	764	0	8.75	7.74	7.40254	10.1583	0.0547447	6.54505	8.98271	0.0547308	chr9	131009082	131094473	131051777	+	protein_coding	KNOWN	LAMC3	4	28	1.15564	Decile 10	Vigintile 20	Expr 50-60%
ENSG00000050628.20	ENST00000306666.9,ENST00000351052.9,ENST00000354608.9,ENST00000356595.8,ENST00000361210.6,ENST00000370924.4,ENST00000370931.7,ENST00000370932.6,ENST00000460330.5,ENST00000479353.5,ENST00000497146.5,ENST00000628037.2	2239	2018.89	22	0.41	0.34	22	0	0.59	0.52	0.36307	0.824384	0.136199	0.321674	0.729648	0.13621	chr1	70852353	71047808	70950080	-	protein_coding	KNOWN	PTGER3	12	7	-0.693023	Decile 2	Vigintile 3	Expr 10-20%
ENSG00000050730.15	ENST00000057513.7,ENST00000506753.1,ENST00000507879.5,ENST00000509841.1,ENST00000511909.5,ENST00000515036.1,ENST00000515605.1	1291.71	1071.61	0	0	0	0	0	0.31	0.27	0.0904723	0.565369	0.277906	0.0816107	0.501789	0.278135	chr4	121131408	121227466	121179437	-	protein_coding	KNOWN	TNIP3	7	13	-0.574938	Decile 3	Vigintile 5	Non-expressed
ENSG00000050748.17	ENST00000343111.10,ENST00000347470.8,ENST00000393360.7,ENST00000393362.8,ENST00000397072.7,ENST00000425491.6,ENST00000452135.6,ENST00000455781.5,ENST00000520212.6,ENST00000523135.1,ENST00000523583.1,ENST00000524170.5,ENST00000539014.5	3051.19	2831.09	1369	18.01	15.16	1369	0	18.03	15.95	16.0352	20.0953	0.0382439	14.1625	17.754	0.0383217	chr5	180233143	180292099	180262621	-	protein_coding	KNOWN	MAPK9	13	12	0.733348	Decile 10	Vigintile 19	Expr 60-70%
ENSG00000050767.15	ENST00000390654.7,ENST00000407622.2,ENST00000484750.1	2493.41	2273.29	180	2.95	2.48	180	0	2.92	2.58	2.4648	3.3932	0.0542333	2.17546	2.99551	0.0541545	chr5	178237618	178590555	178414086	-	protein_coding	KNOWN	COL23A1	3	29	1.03453	Decile 10	Vigintile 20	Expr 30-40%
ENSG00000050820.16	ENST00000162330.9,ENST00000393420.10,ENST00000393422.6,ENST00000418647.7,ENST00000420641.7,ENST00000535626.6,ENST00000538440.6,ENST00000542031.6,ENST00000546196.2,ENST00000561970.1,ENST00000562556.5,ENST00000563038.5,ENST00000563323.1,ENST00000563700.1,ENST00000564028.1,ENST00000564170.1,ENST00000566465.1,ENST00000566982.1,ENST00000567215.1,ENST00000568864.1,ENST00000569006.1,ENST00000569340.1	3196.96	2976.84	3864	48.36	40.7	3864.3	0.72	48.73	43.09	46.2363	51.4017	0.018215	40.8757	45.434	0.0182105	chr16	75228187	75268053	75248120	-	protein_coding	KNOWN	BCAR1	22	8	0.809423	Decile 10	Vigintile 19	Expr 80-90%
ENSG00000051009.10	ENST00000265978.8,ENST00000449352.6,ENST00000524416.1,ENST00000529360.1,ENST00000532797.1	2580.65	2360.54	855	13.49	11.36	855	0	13.23	11.7	11.9742	14.4778	0.0316686	10.6152	12.8272	0.0316992	chr11	6211335	6234711	6223023	-	protein_coding	KNOWN	FAM160A2	5	12	0.3445	Decile 9	Vigintile 17	Expr 50-60%
ENSG00000051108.14	ENST00000300302.9,ENST00000344114.8,ENST00000379792.6,ENST00000439977.6,ENST00000562914.1,ENST00000563343.5,ENST00000563781.5,ENST00000563911.5,ENST00000564678.1,ENST00000565966.5,ENST00000566550.1,ENST00000567944.1,ENST00000568358.1,ENST00000568651.1,ENST00000568676.5,ENST00000568814.1,ENST00000569429.5,ENST00000569569.5,ENST00000570273.5	1313.4	1093.32	615	20.96	17.64	615	0	22.29	19.71	19.0366	25.7426	0.0531711	16.8455	22.7818	0.0531456	chr16	56932048	56944863	56938455	+	protein_coding	KNOWN	HERPUD1	19	8	0.421166	Decile 9	Vigintile 17	Expr 60-70%
ENSG00000051128.18	ENST00000221222.15,ENST00000392351.7,ENST00000433218.6,ENST00000539827.5,ENST00000542541.6,ENST00000594439.5,ENST00000594794.5,ENST00000595756.1,ENST00000596482.5,ENST00000599097.1,ENST00000599808.1,ENST00000600077.5	1191.99	971.88	810.73	31.08	26.16	810.47	1.22	30.48	26.95	27.9449	33.1784	0.0294117	24.7137	29.3442	0.0293659	chr19	18929201	18941261	18935231	-	protein_coding	KNOWN	HOMER3	12	10	1.84594	Decile 10	Vigintile 20	Expr 70-80%
ENSG00000051180.16	ENST00000267868.7,ENST00000382643.7,ENST00000423169.6,ENST00000525066.5,ENST00000526763.5,ENST00000527860.5,ENST00000531277.2,ENST00000532743.5,ENST00000533741.1,ENST00000557850.5	1714.72	1494.61	1075	26.79	22.55	1075	0	26.82	23.71	23.8262	29.9274	0.0389603	21.0544	26.4509	0.0389674	chr15	40694774	40732339	40713556	+	protein_coding	KNOWN	RAD51	10	10	0.66128	Decile 9	Vigintile 18	Expr 70-80%
ENSG00000051341.13	ENST00000264233.5,ENST00000474243.1,ENST00000488282.1,ENST00000621776.4	6766.74	6546.64	977.58	5.56	4.68	977.58	0.49	5.45	4.82	4.69619	6.25387	0.049385	4.14792	5.52648	0.0492939	chr3	121431427	121546641	121489034	-	protein_coding	KNOWN	POLQ	4	31	-0.24154	Decile 6	Vigintile 11	Expr 40-50%
ENSG00000051382.8	ENST00000289153.6,ENST00000461451.1,ENST00000462294.1,ENST00000462898.5,ENST00000465581.1,ENST00000469284.6,ENST00000473435.1,ENST00000477593.5,ENST00000481749.5,ENST00000483968.5,ENST00000485060.1,ENST00000487552.1,ENST00000493568.5,ENST00000544716.5	2684.22	2464.12	907	13.71	11.54	907	0	13.93	12.32	12.297	15.6	0.0404917	10.8652	13.7861	0.040487	chr3	138652699	138834938	138743818	-	protein_coding	KNOWN	PIK3CB	14	23	-0.020124	Decile 7	Vigintile 14	Expr 50-60%
ENSG00000051523.10	ENST00000261623.7,ENST00000561972.1,ENST00000562209.1,ENST00000563526.5,ENST00000565588.5,ENST00000566229.1,ENST00000566534.5,ENST00000567174.5,ENST00000568278.1,ENST00000569359.5	825.91	605.8	2342	144.02	121.22	2342	0.04	140.89	124.58	132.651	150.333	0.0199354	117.133	132.78	0.0199019	chr16	88643283	88651152	88647217	-	protein_coding	KNOWN	CYBA	10	6	1.71356	Decile 10	Vigintile 20	Expr 95-96%
ENSG00000051596.9	ENST00000265097.8,ENST00000432305.6,ENST00000505969.1,ENST00000510300.5,ENST00000511062.5,ENST00000513006.1,ENST00000513118.1,ENST00000513482.1,ENST00000514250.1,ENST00000514861.5,ENST00000515016.1,ENST00000628318.2	1256.69	1036.6	1498.43	53.85	45.32	1489.29	45.32	53.04	46.89	44.8245	60.891	0.0513791	39.6629	53.8748	0.0513617	chr5	175917873	176034680	175976276	-	protein_coding	KNOWN	THOC3	12	6	0.570425	Decile 9	Vigintile 18	Expr 80-90%
ENSG00000051620.10	ENST00000367697.7,ENST00000448741.5,ENST00000453452.1,ENST00000607197.5	2811.8	2591.7	769	11.05	9.3	769	0	10.95	9.69	8.97155	12.9327	0.0618999	7.94675	11.4497	0.0618927	chr6	138403531	138422197	138412864	+	protein_coding	KNOWN	HEBP2	4	4	-0.27305	Decile 5	Vigintile 10	Expr 50-60%
ENSG00000051825.14	ENST00000302373.8,ENST00000369865.3,ENST00000535049.5,ENST00000536198.1,ENST00000537854.5,ENST00000538169.5,ENST00000538250.5,ENST00000539024.5,ENST00000539336.2,ENST00000539639.5,ENST00000541076.6,ENST00000541437.5,ENST00000541603.6,ENST00000541823.1,ENST00000544217.1,ENST00000545406.1,ENST00000545556.6,ENST00000545974.5,ENST00000563178.1,ENST00000606320.5,ENST00000606321.1,ENST00000606326.1,ENS…	2431.22	2211.15	666.81	11.23	9.46	667.59	3.65	13.92	12.31	11.1434	16.6748	0.0696651	9.89808	14.7856	0.06959	chr12	123152320	123244014	123198167	-	protein_coding	KNOWN	MPHOSPH9	24	24	0.66803	Decile 9	Vigintile 18	Expr 50-60%
ENSG00000052126.14	ENST00000299275.10,ENST00000424268.5,ENST00000429027.6,ENST00000510738.2,ENST00000534979.1,ENST00000535357.5,ENST00000536974.5,ENST00000537027.1,ENST00000538034.5,ENST00000538068.1,ENST00000538305.5,ENST00000538677.1,ENST00000538714.5,ENST00000538972.1,ENST00000539256.5,ENST00000540972.5	3975.82	3755.71	2443	24.23	20.4	2443	0	24.17	21.37	22.8726	25.4447	0.0183429	20.2188	22.49	0.0183309	chr12	19129752	19376400	19253076	+	protein_coding	KNOWN	PLEKHA5	16	32	-0.211966	Decile 6	Vigintile 11	Expr 70-80%
ENSG00000052344.15	ENST00000317508.10,ENST00000564025.1,ENST00000567531.5,ENST00000567797.1,ENST00000567833.1,ENST00000568261.5	1849.92	1629.8	3294	75.29	63.37	3293.96	0.19	71.85	63.53	69.2566	74.3957	0.0123808	61.3553	65.8864	0.0123423	chr16	31131433	31135762	31133597	-	protein_coding	KNOWN	PRSS8	6	6	1.56744	Decile 10	Vigintile 20	Expr 90-91%
ENSG00000052723.11	ENST00000060969.5,ENST00000369524.5,ENST00000369528.9,ENST00000462123.5,ENST00000466657.1,ENST00000471969.1,ENST00000474562.1,ENST00000475335.5,ENST00000506320.1,ENST00000510745.5	1293.59	1073.59	1166	40.46	34.05	1166	0	39.79	35.18	34.6639	44.962	0.0447963	30.6401	39.7508	0.0448307	chr1	114769479	114780685	114775082	-	protein_coding	KNOWN	SIKE1	10	5	-0.172998	Decile 6	Vigintile 12	Expr 80-90%
ENSG00000052749.13	ENST00000315563.10,ENST00000370992.8,ENST00000414986.5,ENST00000439965.6,ENST00000465394.1,ENST00000479317.1,ENST00000479481.5,ENST00000487612.1,ENST00000490815.1,ENST00000491313.5,ENST00000536831.5,ENST00000618765.1,ENST00000619048.1,ENST00000621606.4,ENST00000622320.4	3677.39	3457.27	3760.66	40.52	34.11	3760.34	0.72	39.88	35.26	37.9319	41.8648	0.016962	33.5896	37.0644	0.016943	chr10	97356358	97426076	97391217	-	protein_coding	KNOWN	RRP12	15	35	0.952893	Decile 10	Vigintile 19	Expr 80-90%
ENSG00000052795.12	ENST00000264433.10,ENST00000504704.6,ENST00000504715.1,ENST00000505130.1,ENST00000505445.1,ENST00000512986.5	4530.9	4310.79	464	4.01	3.37	464	0	4.2	3.72	3.43094	5.05498	0.0669804	3.03545	4.4727	0.06693	chr4	158769138	158908049	158838593	+	protein_coding	KNOWN	FNIP2	6	17	-0.376853	Decile 5	Vigintile 9	Expr 30-40%
ENSG00000052802.12	ENST00000261507.10,ENST00000393766.6,ENST00000504317.1,ENST00000505270.1,ENST00000507013.5	2024.43	1804.31	1652.37	34.12	28.71	1652.36	0.48	32.72	28.93	30.897	34.5483	0.019212	27.2973	30.5183	0.0191677	chr4	165327623	165343160	165335391	+	protein_coding	KNOWN	MSMO1	5	6	-0.088948	Decile 7	Vigintile 13	Expr 70-80%
ENSG00000052841.14	ENST00000039989.8,ENST00000299240.10,ENST00000418561.2,ENST00000524936.1,ENST00000525029.1,ENST00000525135.5,ENST00000525543.5,ENST00000526774.5,ENST00000529140.1,ENST00000530469.1,ENST00000530483.1,ENST00000533072.1,ENST00000533554.1,ENST00000534347.5,ENST00000534417.1	2669.91	2449.82	2707	41.16	34.65	2707	0	40.33	35.66	36.7674	44.1646	0.0313971	32.5232	39.0655	0.0313399	chr11	43358932	43494933	43426932	+	protein_coding	KNOWN	TTC17	15	24	-0.186822	Decile 6	Vigintile 12	Expr 80-90%
ENSG00000052850.5	ENST00000329255.3	5750	5529.89	1	0.01	0.01	1	0	0.01	0.01	0.000217726	0.0305431	0.472882	0.000221839	0.0270325	0.472771	chr11	44260444	44310166	44285305	-	protein_coding	KNOWN	ALX4	1	4	0.352314	Decile 9	Vigintile 17	Expr 0-10%
ENSG00000053108.16	ENST00000265342.11,ENST00000507112.1,ENST00000509525.5,ENST00000510685.1,ENST00000511375.1,ENST00000514998.1,ENST00000621681.4	2897.06	2676.95	191	2.66	2.24	191	0	3.07	2.71	2.26759	3.95485	0.0963046	1.99612	3.48795	0.0962683	chr5	133196455	133612564	133404509	-	protein_coding	KNOWN	FSTL4	7	16	0.144472	Decile 8	Vigintile 15	Expr 30-40%
ENSG00000053254.15	ENST00000261302.9,ENST00000345097.8,ENST00000553353.5,ENST00000553840.5,ENST00000553904.1,ENST00000554005.1,ENST00000555010.1,ENST00000555034.5,ENST00000555353.5,ENST00000555658.5,ENST00000555855.5,ENST00000556541.1,ENST00000556916.5,ENST00000557258.5,ENST00000557261.1,ENST00000557496.1,ENST00000557572.1,ENST00000557718.5,ENST00000615335.4	4359.97	4139.86	5254.65	47.29	39.8	5253.69	15.66	50.04	44.25	44.9037	56.3698	0.035792	39.7446	49.8903	0.0357365	chr14	89124871	89619149	89372010	-	protein_coding	KNOWN	FOXN3	19	7	0.094407	Decile 8	Vigintile 15	Expr 80-90%
ENSG00000053328.8	ENST00000338882.4,ENST00000490043.1	1119	898.89	3	0.12	0.1	3	0	0.22	0.19	0.0515918	0.419487	0.305884	0.0461573	0.371671	0.305779	chr6	110245928	110358272	110302100	-	protein_coding	KNOWN	METTL24	2	5	-0.146937	Decile 6	Vigintile 12	Expr 0-10%
ENSG00000053371.12	ENST00000235835.7,ENST00000330072.9,ENST00000481966.1,ENST00000489286.5,ENST00000492217.1	1327.05	1106.94	743	25.01	21.05	743	0	24.13	21.34	22.2114	26.0184	0.0271723	19.6945	23.0646	0.0271545	chr1	19303965	19312146	19308055	-	protein_coding	KNOWN	AKR7A2	5	7	1.32366	Decile 10	Vigintile 20	Expr 70-80%
ENSG00000053372.4	ENST00000330263.4,ENST00000479559.1,ENST00000493700.1	2156.56	1936.45	2016	38.78	32.64	2016	0	37.19	32.88	35.0987	39.4432	0.0201024	31.0428	34.8829	0.0200464	chr1	19251539	19260128	19255833	+	protein_coding	KNOWN	MRTO4	3	8	1.42038	Decile 10	Vigintile 20	Expr 80-90%
ENSG00000053438.8	ENST00000062104.3,ENST00000346199.2	1271.76	1051.65	2615	92.63	77.97	2615	0	87.71	77.56	84.3111	91.0626	0.0132879	74.6305	80.5801	0.0132983	chr20	37521215	37523693	37522454	+	protein_coding	KNOWN	NNAT	2	3	0.524569	Decile 9	Vigintile 18	Expr 92-93%
ENSG00000053501.12	ENST00000263897.9,ENST00000445667.6,ENST00000593597.1,ENST00000594399.1,ENST00000594724.5,ENST00000595101.5,ENST00000596136.5,ENST00000600970.5,ENST00000601592.5,ENST00000601662.5	944.61	724.51	197	10.13	8.53	197	0	10.66	9.42	8.98507	12.3485	0.0542538	7.94425	10.9199	0.0542551	chr19	17215346	17219829	17217587	+	protein_coding	KNOWN	USE1	10	8	1.69542	Decile 10	Vigintile 20	Expr 50-60%
ENSG00000053524.11	ENST00000328913.7,ENST00000414362.6,ENST00000447025.6,ENST00000459750.5,ENST00000461074.1,ENST00000464626.1,ENST00000468976.5,ENST00000473233.5,ENST00000475664.1,ENST00000478652.1,ENST00000482017.1,ENST00000488149.5,ENST00000492331.1	2344.45	2124.38	242.97	4.26	3.59	241.3	4.2	5.13	4.54	3.92279	6.38572	0.0830047	3.47724	5.65615	0.0829799	chr3	183178043	183428778	183303410	-	protein_coding	KNOWN	MCF2L2	13	30	0.118714	Decile 8	Vigintile 15	Expr 30-40%
ENSG00000053702.14	ENST00000337508.8,ENST00000542386.1,ENST00000542990.5	2746	2525.89	63	0.93	0.78	63	0	1.11	0.98	0.770281	1.49009	0.108936	0.676203	1.31315	0.10888	chr12	2825348	2835544	2830446	-	protein_coding	KNOWN	NRIP2	3	6	0.895763	Decile 10	Vigintile 19	Expr 20-30%
ENSG00000053747.15	ENST00000269217.10,ENST00000313654.13,ENST00000399516.7,ENST00000585600.5,ENST00000586709.1,ENST00000586751.5,ENST00000587184.5,ENST00000588004.1,ENST00000588164.2,ENST00000588770.5,ENST00000590104.1,ENST00000591749.1,ENST00000592442.1,ENST00000592519.1	4905.81	4685.73	96	0.76	0.64	96	0	1.63	1.44	0.951614	2.36095	0.153869	0.839217	2.08637	0.153916	chr18	23689443	23955066	23822254	+	protein_coding	KNOWN	LAMA3	14	75	0.057638	Decile 8	Vigintile 15	Expr 20-30%
ENSG00000053770.11	ENST00000261558.7,ENST00000431972.6,ENST00000554213.1,ENST00000554863.1,ENST00000554931.1,ENST00000555448.5,ENST00000556377.1,ENST00000556723.1,ENST00000556995.1	2329.53	2109.43	1130	19.96	16.8	1130	0	19.89	17.59	17.8758	21.9402	0.0352163	15.8039	19.4019	0.0351371	chr14	57268909	57298742	57283825	+	protein_coding	KNOWN	AP5M1	9	9	-0.350714	Decile 5	Vigintile 9	Expr 60-70%
ENSG00000053900.10	ENST00000315368.7,ENST00000503805.5,ENST00000504256.5,ENST00000505080.1,ENST00000505842.5,ENST00000505991.1,ENST00000506973.1,ENST00000507809.1,ENST00000507925.1,ENST00000510092.5,ENST00000515848.1	2270.13	2050.03	917	16.66	14.03	917	0	16.7	14.76	14.9004	18.5102	0.037546	13.2073	16.399	0.037495	chr4	25377213	25418498	25397855	+	protein_coding	KNOWN	ANAPC4	11	29	-0.267085	Decile 5	Vigintile 10	Expr 60-70%
ENSG00000053918.15	ENST00000155840.9,ENST00000335475.5,ENST00000345015.4,ENST00000380776.4,ENST00000496887.6,ENST00000526095.1	3245	3024.89	103	1.27	1.07	103	0	4.39	3.88	1.35017	9.49117	0.345771	1.21408	8.41454	0.345784	chr11	2444684	2849109	2646896	+	protein_coding	KNOWN	KCNQ1	6	16	0.752248	Decile 10	Vigintile 19	Expr 20-30%
ENSG00000054116.11	ENST00000373159.1,ENST00000373162.5,ENST00000373163.5,ENST00000373166.7,ENST00000462715.1,ENST00000469757.1,ENST00000497251.1,ENST00000616074.4,ENST00000616395.4,ENST00000617904.4	1184.6	965.31	1077	41.56	34.98	1077	0	43.28	38.27	35.6497	53.2483	0.0711027	31.6254	47.1877	0.0711147	chr1	36136570	36156053	36146311	-	protein_coding	KNOWN	TRAPPC3	10	5	1.00845	Decile 10	Vigintile 19	Expr 80-90%
ENSG00000054118.13	ENST00000354618.9,ENST00000466743.1,ENST00000469141.6,ENST00000478853.1	4214.62	3994.51	8584.99	80.07	67.39	8585	0.68	76.65	67.77	73.6464	79.8712	0.0139574	65.1817	70.6684	0.013942	chr1	36224416	36305357	36264886	+	protein_coding	KNOWN	THRAP3	4	13	0.804709	Decile 10	Vigintile 19	Expr 91-92%
ENSG00000054148.17	ENST00000247665.11,ENST00000371661.5,ENST00000462205.5,ENST00000463215.1,ENST00000492540.5,ENST00000497413.1	782.69	562.61	1736	114.95	96.75	1736	0	109.22	96.57	103.301	114.973	0.0184323	91.3897	101.699	0.0183765	chr9	136848724	136851027	136849875	+	protein_coding	KNOWN	PHPT1	6	5	1.99309	Decile 10	Vigintile 20	Expr 94-95%
ENSG00000054179.11	ENST00000312665.7,ENST00000355097.6,ENST00000460614.1,ENST00000469106.4	1899.32	1679.21	63	1.4	1.18	63	0	1.5	1.33	1.12438	1.91429	0.090611	0.985958	1.68515	0.0905799	chr9	137048098	137054045	137051071	-	protein_coding	KNOWN	ENTPD2	4	9	1.81225	Decile 10	Vigintile 20	Expr 20-30%
ENSG00000054219.10	ENST00000263636.4,ENST00000471164.1,ENST00000484559.1,ENST00000492955.1	3852.57	3632.46	160.69	1.65	1.39	150.47	14.05	1.79	1.58	1.28333	2.32707	0.100818	1.13555	2.05909	0.100817	chr2	159803355	159904749	159854052	-	protein_coding	KNOWN	LY75	4	35	-0.457647	Decile 4	Vigintile 7	Expr 20-30%
ENSG00000054267.20	ENST00000264183.7,ENST00000349213.7,ENST00000366603.6,ENST00000418304.1,ENST00000421364.5,ENST00000444620.2,ENST00000462969.1,ENST00000466653.1,ENST00000471257.5,ENST00000474401.1,ENST00000474953.5,ENST00000491632.5,ENST00000494543.1	4519.57	4299.47	1352.81	11.72	9.87	1354.57	16.81	12.46	11.02	10.5532	14.5427	0.0534478	9.30949	12.8347	0.0534208	chr1	235131634	235328219	235229926	-	protein_coding	KNOWN	ARID4B	13	25	0.160805	Decile 8	Vigintile 16	Expr 50-60%
ENSG00000054277.12	ENST00000366554.2,ENST00000462265.5,ENST00000463155.5,ENST00000469376.5,ENST00000478849.1,ENST00000490673.5	2008.27	1788.16	416.76	8.68	7.31	416.37	0.9	8.75	7.74	7.75121	9.76011	0.0392394	6.86744	8.64308	0.0391713	chr1	241590102	241677376	241633739	-	protein_coding	KNOWN	OPN3	6	5	-0.309611	Decile 5	Vigintile 10	Expr 50-60%
ENSG00000054282.15	ENST00000366541.7,ENST00000435549.1,ENST00000463012.1,ENST00000463042.1,ENST00000476722.6,ENST00000482234.1,ENST00000490065.5,ENST00000491888.1,ENST00000493334.1,ENST00000496361.1,ENST00000497459.1	1025.76	805.71	293.27	13.56	11.41	293.35	1.21	14.51	12.83	11.9388	17.2367	0.0633946	10.5465	15.233	0.0633856	chr1	243256034	243500092	243378063	+	protein_coding	KNOWN	SDCCAG8	11	18	-0.191371	Decile 6	Vigintile 12	Expr 50-60%
ENSG00000054356.13	ENST00000295718.6,ENST00000409251.7,ENST00000412847.5,ENST00000423636.6,ENST00000440552.5,ENST00000442029.5,ENST00000443981.5,ENST00000446182.5,ENST00000451506.5,ENST00000460801.5,ENST00000462351.5,ENST00000468454.1,ENST00000476930.1,ENST00000477819.1,ENST00000484986.1,ENST00000486480.1,ENST00000489650.1,ENST00000497977.1,ENST00000606213.5	2648.28	2428.18	337	5.17	4.35	337	0	7.28	6.44	5.77362	8.86322	0.0737688	5.08849	7.82208	0.0737549	chr2	219289623	219309648	219299635	-	protein_coding	KNOWN	PTPRN	19	23	1.1197	Decile 10	Vigintile 20	Expr 40-50%
ENSG00000054392.12	ENST00000261458.7,ENST00000367009.2,ENST00000367010.5,ENST00000413764.6,ENST00000426968.2,ENST00000537898.5,ENST00000541565.5,ENST00000545154.5,ENST00000545781.2	3594	3373.89	12	0.13	0.11	12	0	0.31	0.27	0.153738	0.508991	0.194748	0.136568	0.450842	0.194775	chr1	210328252	210676296	210502274	+	protein_coding	KNOWN	HHAT	9	12	-0.205657	Decile 6	Vigintile 11	Expr 0-10%
ENSG00000054523.17	ENST00000263934.10,ENST00000377081.5,ENST00000377083.5,ENST00000377086.5,ENST00000377093.8,ENST00000465635.5,ENST00000470616.1,ENST00000483340.1,ENST00000495136.1,ENST00000497835.1,ENST00000620295.2,ENST00000622724.3,ENST00000635499.1	8588.49	8368.38	5683.75	25.3	21.3	5683.61	3.51	24.86	21.98	23.4802	26.2658	0.0197281	20.7972	23.2619	0.019694	chr1	10210805	10381603	10296204	+	protein_coding	KNOWN	KIF1B	13	49	0.58574	Decile 9	Vigintile 18	Expr 70-80%
ENSG00000054598.6	ENST00000380874.3	3926	3705.89	5	0.05	0.04	5	0	0.06	0.05	0.0176773	0.10386	0.275546	0.0156496	0.0918871	0.275554	chr6	1609972	1613897	1611934	+	protein_coding	KNOWN	FOXC1	1	1	0.423532	Decile 9	Vigintile 17	Expr 0-10%
ENSG00000054611.13	ENST00000337137.8,ENST00000355704.7,ENST00000380995.5,ENST00000394449.6,ENST00000406733.1,ENST00000407381.7,ENST00000441162.5,ENST00000441936.5,ENST00000472791.5,ENST00000486163.5,ENST00000496139.5	2780.62	2560.5	694	10.1	8.5	694	0	10.21	9.03	9.19893	11.3198	0.0355733	8.13133	10.0068	0.0356566	chr22	46762617	47175699	46969158	+	protein_coding	KNOWN	TBC1D22A	11	14	0.524953	Decile 9	Vigintile 18	Expr 50-60%
ENSG00000054654.15	ENST00000341472.9,ENST00000344113.8,ENST00000357395.7,ENST00000358025.7,ENST00000394768.6,ENST00000441438.2,ENST00000458046.6,ENST00000553289.5,ENST00000553308.1,ENST00000553455.1,ENST00000553801.1,ENST00000553806.5,ENST00000554584.5,ENST00000554805.5,ENST00000554928.1,ENST00000554997.1,ENST00000555002.5,ENST00000555022.5,ENST00000555241.5,ENST00000555323.1,ENST00000555612.5,ENST00000556342.1,ENS…	5329.29	5109.18	3821	27.86	23.45	3821	0	29.15	25.77	25.995	32.4789	0.0379411	22.9976	28.7243	0.0379337	chr14	63852983	64226433	64039708	+	protein_coding	KNOWN	SYNE2	29	116	0.048569	Decile 8	Vigintile 15	Expr 70-80%
ENSG00000054690.13	ENST00000329153.9,ENST00000557971.5,ENST00000558214.1,ENST00000558296.1,ENST00000558366.5,ENST00000558386.5,ENST00000558981.5,ENST00000559168.1,ENST00000559766.1,ENST00000559832.1,ENST00000559981.1,ENST00000560100.1,ENST00000561057.1,ENST00000561135.1,ENST00000561370.5,ENST00000561456.5	4134.76	3914.66	2380.67	22.66	19.07	2380.76	1.73	37.76	33.39	21.46	67.234	0.224068	19.0033	59.4991	0.223912	chr14	67533301	67589612	67561456	+	protein_coding	KNOWN	PLEKHH1	16	29	0.425306	Decile 9	Vigintile 17	Expr 70-80%
ENSG00000054793.13	ENST00000311637.9,ENST00000338821.5,ENST00000477492.1	7932.95	7712.83	777	3.75	3.16	777	0	3.71	3.28	3.35889	4.11118	0.032403	2.97203	3.63743	0.0324633	chr20	51596514	51768634	51682574	-	protein_coding	KNOWN	ATP9A	3	28	0.346416	Decile 9	Vigintile 17	Expr 30-40%
ENSG00000054796.12	ENST00000345868.8,ENST00000371260.8,ENST00000371263.7,ENST00000418127.5,ENST00000494972.1	1410.2	1190.09	0	0	0	0	0	0.17	0.15	0.0341731	0.331168	0.318494	0.0306709	0.293349	0.318458	chr20	57329759	57343994	57336876	+	protein_coding	KNOWN	SPO11	5	13	0.227645	Decile 8	Vigintile 16	Non-expressed
ENSG00000054803.3	ENST00000064571.2	3024	2803.89	2	0.03	0.02	2	0	0.04	0.03	0.00363941	0.0811185	0.387171	0.00297833	0.0715074	0.387055	chr20	55997440	56005472	56001456	-	protein_coding	KNOWN	CBLN4	1	3	-0.619151	Decile 2	Vigintile 4	Expr 0-10%
ENSG00000054938.15	ENST00000263671.9,ENST00000376324.7,ENST00000376332.7,ENST00000525413.5,ENST00000528471.1,ENST00000528789.1,ENST00000529912.5,ENST00000534159.5,ENST00000534276.5,ENST00000622063.4	1809.49	1589.38	13	0.3	0.26	13	0	0.94	0.83	0.420566	1.6017	0.212173	0.371082	1.41553	0.21204	chr11	74696429	74731385	74713907	-	protein_coding	KNOWN	CHRDL2	10	12	0.548034	Decile 9	Vigintile 18	Expr 10-20%
ENSG00000054965.10	ENST00000064778.8,ENST00000356467.4,ENST00000432223.2,ENST00000450446.6,ENST00000632101.1	5844.2	5624.09	1754.7	11.62	9.78	1754.71	0.45	11.3	9.99	10.4568	12.1708	0.0260775	9.25624	10.772	0.0260574	chr11	73400487	73598189	73499338	-	protein_coding	KNOWN	FAM168A	5	9	0.512618	Decile 9	Vigintile 18	Expr 50-60%
ENSG00000054967.12	ENST00000064780.6,ENST00000393580.2,ENST00000537771.1,ENST00000539134.1,ENST00000544075.5,ENST00000545687.5,ENST00000545886.1	3300.17	3080.05	230	2.78	2.34	225.75	3.67	2.97	2.63	2.4321	3.53122	0.0627813	2.15049	3.12285	0.0627764	chr11	73376264	73397474	73386869	+	protein_coding	KNOWN	RELT	7	11	1.18376	Decile 10	Vigintile 20	Expr 30-40%
ENSG00000054983.16	ENST00000261304.6,ENST00000393568.8,ENST00000393569.6,ENST00000474294.6,ENST00000477716.3,ENST00000544807.6,ENST00000554372.5,ENST00000554916.5,ENST00000555000.5,ENST00000555179.1,ENST00000555956.1,ENST00000556261.5,ENST00000556879.5,ENST00000557316.5,ENST00000557520.1,ENST00000622264.4	3058.01	2837.9	462	6.06	5.1	462	0	7.29	6.45	6.18804	8.48988	0.0547075	5.46002	7.49828	0.0546998	chr14	87837820	87993665	87915742	-	protein_coding	KNOWN	GALC	16	17	-0.501976	Decile 3	Vigintile 6	Expr 40-50%
ENSG00000055044.10	ENST00000264279.9,ENST00000426814.5,ENST00000433543.2,ENST00000467734.5,ENST00000472050.5,ENST00000478508.1,ENST00000478941.1,ENST00000488403.5,ENST00000492688.5,ENST00000492740.5	1720.42	1500.32	3195	79.33	66.77	3195	0	76.69	67.81	72.3665	81.3205	0.0201987	63.8856	71.7895	0.0201375	chr2	202265716	202303666	202284691	+	protein_coding	KNOWN	NOP58	10	15	0.242276	Decile 8	Vigintile 16	Expr 91-92%
ENSG00000055070.16	ENST00000401088.8,ENST00000401089.3,ENST00000471507.5,ENST00000472351.5,ENST00000472461.1,ENST00000475078.1,ENST00000475554.5,ENST00000476423.5,ENST00000486763.5,ENST00000492354.1	3015.59	2795.48	4358	58.08	48.88	4357.95	0.23	56.28	49.76	53.4776	59.0384	0.0170286	47.3826	52.2854	0.0170216	chr1	16352575	16398145	16375360	+	protein_coding	KNOWN	SZRD1	10	5	0.926609	Decile 10	Vigintile 19	Expr 80-90%
ENSG00000055118.14	ENST00000262186.9,ENST00000330883.8,ENST00000430723.4,ENST00000461280.1,ENST00000473610.5,ENST00000532957.5	3222.71	3002.59	557	6.91	5.82	557	0	6.59	5.82	6.00238	7.19142	0.0312628	5.30006	6.35232	0.0312239	chr7	150944961	150978315	150961638	-	protein_coding	KNOWN	KCNH2	6	15	1.20005	Decile 10	Vigintile 20	Expr 40-50%
ENSG00000055130.15	ENST00000325222.8,ENST00000409469.5,ENST00000602748.5,ENST00000617797.1	3061.03	2840.92	3303.18	43.32	36.46	3303.25	2.06	41.05	36.3	39.6121	42.4328	0.011828	35.0502	37.5402	0.0117919	chr7	148697914	148801036	148749475	+	protein_coding	KNOWN	CUL1	4	22	-0.004221	Decile 7	Vigintile 14	Expr 80-90%
ENSG00000055147.17	ENST00000351797.8,ENST00000517605.1,ENST00000517803.5,ENST00000518102.5,ENST00000518735.1,ENST00000518900.1,ENST00000518914.1,ENST00000518946.1,ENST00000519808.5,ENST00000520313.5,ENST00000520667.5,ENST00000521031.1,ENST00000522395.5,ENST00000522634.1,ENST00000522858.5,ENST00000523705.5,ENST00000524246.1,ENST00000616320.4	1698.07	1477.98	242	6.1	5.13	242	0	7.8	6.9	6.12564	9.53677	0.0754334	5.41349	8.43473	0.0753714	chr5	153990128	154038936	154014532	-	protein_coding	KNOWN	FAM114A2	18	15	-0.262504	Decile 5	Vigintile 10	Expr 40-50%
ENSG00000055163.18	ENST00000435847.6,ENST00000518456.1,ENST00000518511.1,ENST00000518555.1,ENST00000519663.5,ENST00000520424.1,ENST00000520942.1,ENST00000520960.2,ENST00000521420.5,ENST00000522463.5,ENST00000522637.5,ENST00000522775.1,ENST00000522884.5,ENST00000522892.1,ENST00000523383.5,ENST00000524058.1,ENST00000611075.4,ENST00000611925.4,ENST00000616178.4,ENST00000617629.4,ENST00000618329.4,ENST00000620254.4,ENS…	2837.79	2617.68	4335.97	61.71	51.94	4335.95	0.22	61.44	54.32	57.635	65.3197	0.0216599	50.9853	57.7883	0.0215958	chr5	157266079	157395595	157330837	+	protein_coding	KNOWN	CYFIP2	25	32	0.057343	Decile 8	Vigintile 15	Expr 80-90%
ENSG00000055208.17	ENST00000367456.5,ENST00000461481.5,ENST00000470466.5,ENST00000484505.1,ENST00000538427.5,ENST00000606202.1,ENST00000606797.5	4220.07	3999.96	2591	24.13	20.31	2591	0.05	23.53	20.81	22.371	24.7042	0.0167188	19.7845	21.8484	0.0167159	chr6	149218641	149411613	149315127	+	protein_coding	KNOWN	TAB2	7	8	-0.375669	Decile 5	Vigintile 9	Expr 70-80%
ENSG00000055211.12	ENST00000367419.9,ENST00000433539.1	1978.39	1758.28	332	7.03	5.92	332	0.05	6.84	6.05	5.99296	7.67969	0.0418677	5.31416	6.80448	0.0418824	chr6	149566294	149591748	149579021	+	protein_coding	KNOWN	GINM1	2	8	-0.18467	Decile 6	Vigintile 12	Expr 40-50%
ENSG00000055332.16	ENST00000233057.8,ENST00000390013.3,ENST00000395127.6,ENST00000405334.5,ENST00000411537.6,ENST00000462861.1,ENST00000496059.1	8490.63	8270.52	1833	8.26	6.95	1833	0	8.74	7.73	7.58961	9.98241	0.0473704	6.71973	8.83543	0.0473412	chr2	37099210	37157065	37128137	-	protein_coding	KNOWN	EIF2AK2	7	17	-0.009885	Decile 7	Vigintile 14	Expr 40-50%
ENSG00000055483.19	ENST00000312010.10,ENST00000449938.6,ENST00000542802.7,ENST00000586066.3,ENST00000586531.5,ENST00000586896.2,ENST00000587010.5,ENST00000587379.1,ENST00000587783.5,ENST00000588086.5,ENST00000588130.5,ENST00000588365.1,ENST00000588467.5,ENST00000589225.5,ENST00000589254.1,ENST00000589424.5,ENST00000590312.1,ENST00000590546.6,ENST00000591052.5,ENST00000591942.6,ENST00000592231.5,ENST00000592275.5,EN…	2910.03	2689.93	2816	39	32.82	2816	0	40.01	35.38	36.8563	43.3531	0.0280529	32.6208	38.3694	0.0280479	chr17	78787381	78841441	78814411	-	protein_coding	KNOWN	USP36	24	21	1.0876	Decile 10	Vigintile 20	Expr 80-90%
ENSG00000055609.17	ENST00000262189.10,ENST00000355193.6,ENST00000360104.7,ENST00000418061.1,ENST00000418673.1,ENST00000424877.5,ENST00000452749.1,ENST00000473186.5,ENST00000485241.1,ENST00000489110.1,ENST00000490130.1,ENST00000558084.5,ENST00000558665.1	9189.79	8969.69	2407	10	8.41	2406.86	0.39	10.99	9.72	9.21501	12.8543	0.0581818	8.14065	11.3604	0.0582413	chr7	152134922	152436005	152285463	-	protein_coding	KNOWN	KMT2C	13	59	-0.077416	Decile 7	Vigintile 13	Expr 50-60%
ENSG00000055732.12	ENST00000341115.8,ENST00000370587.5,ENST00000370589.6,ENST00000474447.1,ENST00000475312.1,ENST00000490600.6	2757.72	2537.6	191	2.8	2.36	191	0	2.77	2.45	2.37142	3.14801	0.0484022	2.10064	2.78824	0.048374	chr1	85018082	85048499	85033290	-	protein_coding	KNOWN	MCOLN3	6	13	-0.415342	Decile 4	Vigintile 8	Expr 30-40%
ENSG00000055813.5	ENST00000407595.2	3982	3761.89	15.42	0.15	0.13	15.08	1.75	0.15	0.13	0.0745022	0.2318	0.184064	0.0661183	0.205255	0.183897	chr2	56184123	56386173	56285148	+	protein_coding	KNOWN	CCDC85A	1	6	-0.517236	Decile 3	Vigintile 6	Expr 0-10%
ENSG00000055917.15	ENST00000319801.9,ENST00000338086.9,ENST00000361078.6,ENST00000403432.5,ENST00000420234.5,ENST00000424110.1,ENST00000429419.6,ENST00000432105.5,ENST00000440577.5,ENST00000442400.5,ENST00000446940.5	4341.06	4120.95	4227	38.21	32.16	4227	0	37.01	32.72	35.238	38.7923	0.0162953	31.1465	34.2825	0.0163232	chr2	20248691	20352234	20300462	-	protein_coding	KNOWN	PUM2	11	21	-0.120012	Decile 7	Vigintile 13	Expr 80-90%
ENSG00000055950.16	ENST00000299179.9,ENST00000318325.6,ENST00000318364.12,ENST00000342071.5,ENST00000370234.4,ENST00000370236.5,ENST00000370241.7,ENST00000370242.8,ENST00000448244.5,ENST00000476012.5,ENST00000477279.1,ENST00000487059.1,ENST00000493646.1,ENST00000523148.5	975.63	755.52	1639.01	80.82	68.02	1639.94	1.04	77.57	68.58	73.5373	81.6249	0.017853	65.1019	72.2511	0.0177897	chr10	100969458	100987515	100978486	-	protein_coding	KNOWN	MRPL43	14	6	0.666535	Decile 9	Vigintile 18	Expr 91-92%
ENSG00000055955.15	ENST00000266041.8,ENST00000406595.5,ENST00000441637.2,ENST00000461966.5,ENST00000464000.1,ENST00000467462.1,ENST00000471505.1,ENST00000473904.1,ENST00000481977.5,ENST00000483372.1,ENST00000484632.1,ENST00000485816.5,ENST00000485894.1,ENST00000491663.5,ENST00000537897.5	1283.69	1063.62	47.42	1.66	1.4	52.79	5.57	3.59	3.17	1.88398	5.62105	0.173893	1.67959	4.9842	0.173918	chr3	52812975	52831479	52822227	-	protein_coding	KNOWN	ITIH4	15	24	1.07704	Decile 10	Vigintile 20	Expr 20-30%
ENSG00000055957.10	ENST00000273283.6,ENST00000405128.3,ENST00000428133.5,ENST00000478667.5,ENST00000480409.1,ENST00000482836.1,ENST00000484844.2,ENST00000487686.5,ENST00000494603.1,ENST00000494705.1,ENST00000537050.5,ENST00000628722.2	1281.92	1061.84	0	0	0	0	0	0.77	0.68	0.294109	1.30713	0.238449	0.261671	1.15771	0.238499	chr3	52777592	52792068	52784830	+	protein_coding	KNOWN	ITIH1	12	22	1.15405	Decile 10	Vigintile 20	Non-expressed
ENSG00000056050.6	ENST00000393381.2,ENST00000506125.1,ENST00000515204.1	1120.25	900.15	578	23.92	20.13	578	0.04	23.09	20.41	20.395	25.8887	0.0415994	17.9866	22.846	0.0416338	chr4	169729465	169757953	169743709	-	protein_coding	KNOWN	C4orf27	3	8	-0.39711	Decile 4	Vigintile 8	Expr 70-80%
ENSG00000056097.15	ENST00000265069.12,ENST00000502988.5,ENST00000505204.1,ENST00000505366.1,ENST00000507465.1,ENST00000510369.5,ENST00000514356.5	4286.18	4066.06	3469	31.78	26.75	3469	0	30.62	27.07	28.6051	32.6502	0.022377	25.3236	28.8983	0.0223588	chr5	32354350	32444761	32399555	-	protein_coding	KNOWN	ZFR	7	20	-0.272324	Decile 5	Vigintile 10	Expr 70-80%
ENSG00000056277.15	ENST00000370978.8,ENST00000447817.1	4224.36	4004.24	432	4.02	3.38	432	0	3.86	3.41	3.38906	4.3164	0.0417516	2.99617	3.81716	0.0417195	chrX	130202711	130268899	130235805	-	protein_coding	KNOWN	ZNF280C	2	19	-0.00519	Decile 7	Vigintile 14	Expr 30-40%
ENSG00000056291.17	ENST00000308744.10,ENST00000344413.5,ENST00000358749.3,ENST00000395999.5,ENST00000506359.1	1432.57	1212.46	11	0.34	0.28	11	0	0.46	0.41	0.24578	0.709518	0.175911	0.215935	0.626246	0.176066	chr4	72031804	72148067	72089935	+	protein_coding	KNOWN	NPFFR2	5	5	-0.739736	Decile 1	Vigintile 2	Expr 10-20%
ENSG00000056487.15	ENST00000313237.9,ENST00000396103.7,ENST00000403565.5,ENST00000414269.1,ENST00000420689.1,ENST00000460507.5,ENST00000462631.1,ENST00000474327.5,ENST00000490679.5,ENST00000491522.1,ENST00000495348.1,ENST00000629843.2	2133.96	1913.88	1025	19.95	16.79	1025	0	20.75	18.34	18.2699	23.3189	0.0420645	16.1546	20.6251	0.0420244	chr22	44881162	45009999	44945580	-	protein_coding	KNOWN	PHF21B	12	14	0.945207	Decile 10	Vigintile 19	Expr 60-70%
ENSG00000056558.10	ENST00000373887.7,ENST00000540010.1,ENST00000546084.5	5277.46	5057.35	198	1.46	1.23	198	0	1.42	1.26	1.20747	1.64542	0.0530385	1.06932	1.45652	0.0530375	chr9	120902393	120929173	120915783	-	protein_coding	KNOWN	TRAF1	3	9	0.38512	Decile 9	Vigintile 17	Expr 20-30%
ENSG00000056586.15	ENST00000335387.9,ENST00000357244.6,ENST00000373670.5,ENST00000398671.2,ENST00000423239.6,ENST00000454740.5,ENST00000471874.2,ENST00000478216.1,ENST00000495727.2,ENST00000498479.5	4261.3	4041.2	1359	12.53	10.54	1359	0	12.49	11.04	11.0373	14.0163	0.0408565	9.78711	12.4231	0.0409228	chr9	122844556	122905341	122874948	-	protein_coding	KNOWN	RC3H2	10	22	0.088115	Decile 8	Vigintile 15	Expr 50-60%
ENSG00000056736.9	ENST00000288167.7,ENST00000475124.1,ENST00000494338.1	2273.22	2053.11	553.69	10.05	8.46	553.71	0.5	9.61	8.5	8.73518	10.5198	0.0317452	7.71704	9.29326	0.0317527	chr3	53846580	53865800	53856190	+	protein_coding	KNOWN	IL17RB	3	11	0.623703	Decile 9	Vigintile 18	Expr 50-60%
ENSG00000056972.18	ENST00000340026.10,ENST00000359831.8,ENST00000368730.5,ENST00000368731.6,ENST00000368734.5,ENST00000368735.1,ENST00000368761.9,ENST00000392556.8,ENST00000464903.1,ENST00000492671.1,ENST00000528599.1,ENST00000532708.5	2047.54	1827.43	718	14.64	12.32	718	0	15.16	13.4	13.1864	17.2673	0.0469868	11.6484	15.2609	0.046952	chr6	111556454	111606278	111581366	-	protein_coding	KNOWN	TRAF3IP2	12	10	-0.258367	Decile 6	Vigintile 11	Expr 60-70%
ENSG00000056998.18	ENST00000353656.10,ENST00000381157.2,ENST00000381161.5,ENST00000381163.7,ENST00000398806.7,ENST00000453106.1,ENST00000469234.6,ENST00000520904.3	2645.52	2425.41	2792	42.88	36.09	2792	0	41.22	36.45	38.4468	43.9755	0.0230858	34.0113	38.8919	0.0230621	chrX	2828788	2882818	2855803	+	protein_coding	KNOWN	GYG2	8	12	0.253208	Decile 8	Vigintile 16	Expr 80-90%
ENSG00000057019.15	ENST00000326840.10,ENST00000326857.9,ENST00000449482.1,ENST00000460008.1,ENST00000469648.5,ENST00000470393.1,ENST00000479144.5,ENST00000486004.1,ENST00000494614.5,ENST00000496736.1	4454.57	4234.47	2712	23.86	20.08	2712.01	0.08	24.05	21.26	21.2822	26.935	0.0409869	18.8703	23.8752	0.0410172	chr3	98795941	98901689	98848815	-	protein_coding	KNOWN	DCBLD2	10	16	-0.412117	Decile 4	Vigintile 8	Expr 70-80%
ENSG00000057149.14	ENST00000283752.9,ENST00000332821.8,ENST00000356424.10	1777	1556.89	10	0.24	0.2	10.04	0.8	0.33	0.29	0.153163	0.526475	0.200154	0.135651	0.465882	0.200128	chr18	63637719	63661963	63649841	-	protein_coding	KNOWN	SERPINB3	3	8	-0.74901	Decile 1	Vigintile 2	Expr 10-20%
ENSG00000057252.12	ENST00000367619.7,ENST00000426956.1,ENST00000539888.5,ENST00000540564.5	4256.02	4035.91	146	1.35	1.13	146	0	1.38	1.22	0.823912	1.92636	0.141066	0.730607	1.70614	0.141142	chr1	179293714	179358680	179326197	+	protein_coding	KNOWN	SOAT1	4	16	-0.166826	Decile 6	Vigintile 12	Expr 20-30%
ENSG00000057294.13	ENST00000070846.10,ENST00000340811.8,ENST00000546498.1,ENST00000546741.2,ENST00000546769.1,ENST00000549461.1,ENST00000552612.5,ENST00000613243.1	3904.91	3684.8	1383.99	13.99	11.78	1383.99	0.1	13.97	12.35	12.956	15.0244	0.0254022	11.4594	13.2882	0.0254095	chr12	32790745	32896840	32843792	-	protein_coding	KNOWN	PKP2	8	15	-0.215159	Decile 6	Vigintile 11	Expr 60-70%
ENSG00000057468.6	ENST00000263187.3	3266	3045.89	0	0	0	0	0	0.01	0.01	5.4057e-07	0.0348358	0.656696	4.77739e-07	0.0307964	0.656733	chr1	75796882	75913238	75855060	+	protein_coding	KNOWN	MSH4	1	20	-0.394602	Decile 4	Vigintile 8	Non-expressed
ENSG00000057593.13	ENST00000346342.7,ENST00000375581.3,ENST00000444337.1,ENST00000473085.1,ENST00000479674.1,ENST00000541084.5	2221.22	2001.12	26	0.48	0.41	26	0	0.76	0.67	0.405971	1.17025	0.177034	0.359408	1.03535	0.176964	chr13	113105788	113120681	113113234	+	protein_coding	KNOWN	F7	6	9	0.921245	Decile 10	Vigintile 19	Expr 10-20%
ENSG00000057608.16	ENST00000380127.5,ENST00000380181.7,ENST00000380191.8,ENST00000418688.5,ENST00000447751.5,ENST00000456041.5,ENST00000479928.1,ENST00000608581.5,ENST00000609712.1	2345.58	2125.47	10933	191.63	161.28	10933	0.11	182.14	161.05	178.41	185.958	0.00710322	157.914	164.52	0.00703919	chr10	5765223	5842132	5803677	-	protein_coding	KNOWN	GDI2	9	11	0.076461	Decile 8	Vigintile 15	Expr 96-97%
ENSG00000057657.14	ENST00000369089.3,ENST00000369091.6,ENST00000369096.8,ENST00000424894.1,ENST00000450060.5,ENST00000481163.1,ENST00000489365.1,ENST00000613999.4	3595.21	3375.1	29	0.32	0.27	29	0	0.79	0.7	0.387137	1.26109	0.199017	0.335096	1.10822	0.199134	chr6	106086320	106109939	106098129	+	protein_coding	KNOWN	PRDM1	8	9	-0.200852	Decile 6	Vigintile 11	Expr 10-20%
ENSG00000057663.12	ENST00000343245.7,ENST00000360666.5,ENST00000369070.5,ENST00000369076.7,ENST00000475645.1,ENST00000476518.1,ENST00000613993.1	3187.17	2967.06	1097	13.77	11.59	1097	0	13.57	11.99	12.583	14.5476	0.0246026	11.1529	12.8901	0.0245885	chr6	106184476	106325820	106255148	-	protein_coding	KNOWN	ATG5	7	8	-0.374763	Decile 5	Vigintile 9	Expr 60-70%
ENSG00000057704.10	ENST00000261226.8,ENST00000548918.1,ENST00000551457.1,ENST00000552239.1	5395.84	5175.73	164	1.18	0.99	164	0	1.52	1.34	1.04032	2.14857	0.125945	0.910145	1.89044	0.126027	chr12	94567124	94650562	94608843	-	protein_coding	KNOWN	TMCC3	4	4	0.03612	Decile 7	Vigintile 14	Expr 20-30%
ENSG00000057757.9	ENST00000246151.8,ENST00000374524.1,ENST00000415372.1	1476.78	1256.66	1677	49.71	41.84	1677	0	47.08	41.63	44.6151	49.4135	0.0176306	39.5399	43.7769	0.0176164	chr1	23778405	23788232	23783318	+	protein_coding	KNOWN	PITHD1	3	6	0.814762	Decile 10	Vigintile 19	Expr 80-90%
ENSG00000057935.13	ENST00000405094.1,ENST00000405592.5,ENST00000406652.5,ENST00000406911.5,ENST00000407270.7,ENST00000409019.5,ENST00000430763.5,ENST00000433553.5,ENST00000454356.5,ENST00000461256.5,ENST00000467925.5,ENST00000472767.5,ENST00000475383.5,ENST00000478602.1,ENST00000482875.5,ENST00000484780.5,ENST00000490611.1,ENST00000491314.1,ENST00000493983.1	1818.41	1598.31	5175	120.62	101.52	5175	0	115.58	102.2	110.193	121.17	0.0161815	97.6049	107.299	0.0161401	chr2	42494569	42756947	42625758	+	protein_coding	KNOWN	MTA3	19	18	0.182669	Decile 8	Vigintile 16	Expr 94-95%
ENSG00000058056.8	ENST00000263966.7,ENST00000482333.5,ENST00000496897.5,ENST00000497155.1,ENST00000497380.1	5585.35	5365.24	1514	10.51	8.85	1514	0	10.42	9.22	9.32964	11.5819	0.0382664	8.23858	10.2317	0.0382375	chr3	179652755	179789401	179721078	+	protein_coding	KNOWN	USP13	5	21	-0.227433	Decile 6	Vigintile 11	Expr 50-60%
ENSG00000058063.15	ENST00000323116.9,ENST00000466758.5,ENST00000475636.1,ENST00000482070.1,ENST00000482794.1,ENST00000484691.1,ENST00000490303.5,ENST00000491699.6,ENST00000493826.1,ENST00000498086.5	3465.93	3245.83	728	8.36	7.03	728	0	8.72	7.71	7.15685	10.3575	0.0632279	6.35052	9.1819	0.0631283	chr3	182793500	182921635	182857567	+	protein_coding	KNOWN	ATP11B	10	30	-0.277705	Decile 5	Vigintile 10	Expr 40-50%
ENSG00000058085.14	ENST00000264144.4,ENST00000461729.1,ENST00000476255.1,ENST00000493293.5	4960.36	4740.24	807	6.34	5.34	807	0	6.62	5.85	5.71662	7.81011	0.0495639	5.04862	6.89849	0.0495531	chr1	183186238	183244900	183215569	+	protein_coding	KNOWN	LAMC2	4	23	0.137967	Decile 8	Vigintile 15	Expr 40-50%
ENSG00000058091.16	ENST00000265741.7,ENST00000380050.7,ENST00000406263.5,ENST00000430760.5,ENST00000431029.5,ENST00000436577.3,ENST00000446224.5,ENST00000446790.5,ENST00000449528.5,ENST00000456689.5,ENST00000460493.1,ENST00000478540.1,ENST00000484035.5,ENST00000487145.1,ENST00000496279.5	4995	4774.89	793	6.19	5.21	793	0	20.97	18.54	7.03296	47.3155	0.377584	6.24338	41.8932	0.377464	chr7	90466424	91210590	90838507	+	protein_coding	KNOWN	CDK14	15	15	-0.368975	Decile 5	Vigintile 9	Expr 40-50%
ENSG00000058262.9	ENST00000243253.7,ENST00000424880.2,ENST00000464451.5,ENST00000481210.5,ENST00000483956.1,ENST00000491668.1,ENST00000498837.1	3580.33	3360.22	8592.98	95.27	80.18	8592.98	0.14	90.76	80.25	88.5691	92.9969	0.00840805	78.3552	82.2396	0.00838822	chr3	128051641	128071683	128061662	+	protein_coding	KNOWN	SEC61A1	7	12	0.712775	Decile 10	Vigintile 19	Expr 92-93%
ENSG00000058272.16	ENST00000261207.9,ENST00000437004.6,ENST00000450142.6,ENST00000546369.5,ENST00000546762.5,ENST00000547131.1,ENST00000547253.5,ENST00000547330.5,ENST00000548318.1,ENST00000548908.2,ENST00000550001.1,ENST00000550007.1,ENST00000550107.5,ENST00000550299.5,ENST00000550351.5,ENST00000550510.5,ENST00000550903.5,ENST00000551191.1,ENST00000551781.2,ENST00000552892.1,ENST00000553081.5,ENST00000634739.1	2741.27	2521.2	2801.52	41.4	34.84	2801.46	1.25	41.59	36.77	36.0253	47.3025	0.0473454	31.8091	41.7792	0.0472237	chr12	79773563	79935460	79854511	-	protein_coding	KNOWN	PPP1R12A	22	26	-0.449427	Decile 4	Vigintile 7	Expr 80-90%
ENSG00000058335.15	ENST00000394745.3,ENST00000419573.7,ENST00000558480.6,ENST00000559926.1,ENST00000560286.1,ENST00000560334.5,ENST00000560943.5,ENST00000561112.1,ENST00000623620.1	5012	4791.89	44	0.34	0.29	44	0	1.63	1.44	0.4652	3.30976	0.31489	0.402841	2.919	0.314853	chr15	78959947	79090773	79025360	-	protein_coding	KNOWN	RASGRF1	9	28	0.457602	Decile 9	Vigintile 18	Expr 10-20%
ENSG00000058404.19	ENST00000258682.10,ENST00000346990.8,ENST00000347193.8,ENST00000350811.7,ENST00000353185.7,ENST00000353625.8,ENST00000358707.7,ENST00000395747.6,ENST00000395749.6,ENST00000415369.5,ENST00000421607.1,ENST00000424197.5,ENST00000425809.5,ENST00000427209.1,ENST00000433930.1,ENST00000440254.6,ENST00000457475.5,ENST00000462128.5,ENST00000466584.5,ENST00000470984.5,ENST00000484972.5,ENST00000489429.5,EN…	4142	3921.89	3	0.03	0.02	3	0	1.59	1.41	0.860679	2.3796	0.166296	0.790449	2.13403	0.166215	chr7	44217150	44334577	44275863	-	protein_coding	KNOWN	CAMK2B	26	24	0.963432	Decile 10	Vigintile 19	Expr 0-10%
ENSG00000058453.16	ENST00000375541.9,ENST00000445545.6,ENST00000465021.5,ENST00000465291.1,ENST00000466256.6,ENST00000467715.2,ENST00000467938.5,ENST00000477773.1,ENST00000486318.1,ENST00000492631.5,ENST00000494191.6,ENST00000497654.2,ENST00000498688.5	3528.93	3308.84	3039.31	34.22	28.8	3039.21	1.57	33.72	29.82	30.5066	36.9909	0.0329433	27.0605	32.7943	0.0328625	chr1	16740273	16972979	16856626	+	protein_coding	KNOWN	CROCC	13	37	0.883222	Decile 10	Vigintile 19	Expr 70-80%
ENSG00000058600.15	ENST00000299853.9,ENST00000359210.8,ENST00000418581.6,ENST00000561494.5,ENST00000563024.5,ENST00000563282.1,ENST00000563766.5,ENST00000564061.5,ENST00000564209.5,ENST00000564256.1,ENST00000564750.5,ENST00000564883.5,ENST00000565117.1,ENST00000565358.5,ENST00000565551.5,ENST00000567022.5,ENST00000569757.1,ENST00000569787.1,ENST00000615879.4	2275.71	2055.62	3115	56.45	47.51	3115	0	55.57	49.13	51.0298	60.1159	0.0280986	45.1573	53.1955	0.0281184	chr16	22297375	22335103	22316239	+	protein_coding	KNOWN	POLR3E	19	21	0.977304	Decile 10	Vigintile 19	Expr 80-90%
ENSG00000058668.14	ENST00000341360.6,ENST00000356729.5,ENST00000357681.9,ENST00000367218.7,ENST00000458092.5,ENST00000466407.1,ENST00000484746.1	5957.39	5737.29	1724	11.19	9.42	1724	0	11.13	9.84	9.81393	12.5508	0.0422615	8.6867	11.1065	0.0422491	chr1	203626561	203744081	203685321	+	protein_coding	KNOWN	ATP2B4	7	22	0.673615	Decile 9	Vigintile 18	Expr 50-60%
ENSG00000058673.15	ENST00000332127.8,ENST00000367210.1,ENST00000367212.7,ENST00000367214.5,ENST00000432282.5,ENST00000453771.5,ENST00000461980.1,ENST00000466470.5,ENST00000480354.1,ENST00000488411.1,ENST00000492823.1,ENST00000495527.5,ENST00000545588.5	3520.97	3300.86	3738.09	42.19	35.51	3739.35	5.41	40.67	35.96	38.5485	42.9271	0.0184817	34.0614	37.9383	0.0184537	chr1	203795654	203854124	203824889	+	protein_coding	KNOWN	ZC3H11A	13	20	0.56013	Decile 9	Vigintile 18	Expr 80-90%
ENSG00000058729.10	ENST00000283109.7,ENST00000508447.1,ENST00000508991.1,ENST00000510384.1,ENST00000511012.1,ENST00000511293.1,ENST00000511920.1	2005.05	1784.97	718	14.99	12.61	717.96	0.19	15.2	13.44	12.0042	18.5375	0.0752147	10.642	16.4238	0.0751619	chr5	97160867	97183260	97172063	-	protein_coding	KNOWN	RIOK2	7	10	-0.580717	Decile 3	Vigintile 5	Expr 60-70%
ENSG00000058799.13	ENST00000072644.5,ENST00000371399.5,ENST00000412288.5,ENST00000464950.6,ENST00000465897.5,ENST00000469457.5,ENST00000472983.1,ENST00000480151.5	1537.54	1317.42	781	22.08	18.59	781	0	21.57	19.07	19.8593	23.263	0.0274171	17.6173	20.6265	0.027396	chr1	53851719	53889834	53870776	-	protein_coding	KNOWN	YIPF1	8	11	0.323988	Decile 9	Vigintile 17	Expr 70-80%
ENSG00000058804.11	ENST00000371429.3,ENST00000480952.1	4800.3	4580.18	2697	21.94	18.46	2697	0	20.98	18.55	19.4925	22.6469	0.0258357	17.2122	19.9989	0.0258547	chr1	53765460	53838860	53802160	-	protein_coding	KNOWN	NDC1	2	18	0.162161	Decile 8	Vigintile 16	Expr 70-80%
ENSG00000058866.14	ENST00000265022.7,ENST00000344484.8,ENST00000382164.8,ENST00000437018.2,ENST00000447054.5,ENST00000466466.1,ENST00000472506.1,ENST00000480809.5,ENST00000480933.1,ENST00000482566.1,ENST00000490452.5	5839.26	5619.15	7	0.05	0.04	7.01	0.09	1.43	1.27	0.448017	2.68702	0.28126	0.398463	2.37902	0.281296	chr3	186105668	186362237	186233952	-	protein_coding	KNOWN	DGKG	11	25	0.105328	Decile 8	Vigintile 15	Expr 0-10%
ENSG00000059122.16	ENST00000253928.13,ENST00000344592.9,ENST00000416288.6,ENST00000570425.5,ENST00000570752.5,ENST00000570759.1,ENST00000571140.5,ENST00000571580.1,ENST00000571983.5,ENST00000573525.1,ENST00000573564.5,ENST00000574985.1,ENST00000575604.1,ENST00000575679.1	3453.3	3233.19	901.11	10.38	8.74	901.11	0.32	11.7	10.34	10.1114	13.3374	0.0472755	8.94204	11.7962	0.0472554	chr16	2911937	2951208	2931572	+	protein_coding	KNOWN	FLYWCH1	14	10	1.76945	Decile 10	Vigintile 20	Expr 50-60%
ENSG00000059145.18	ENST00000248104.11,ENST00000301712.5,ENST00000382757.9,ENST00000389221.8,ENST00000397464.5,ENST00000402641.6,ENST00000403703.5,ENST00000502438.6,ENST00000503648.1,ENST00000508903.6,ENST00000509981.1,ENST00000511095.2,ENST00000513783.1,ENST00000515195.1,ENST00000561783.1,ENST00000562537.1,ENST00000566707.1	2844.24	2624.13	709.68	10.08	8.48	709.52	5.67	26.41	23.35	11.3072	48.9811	0.2672	9.89634	43.2298	0.267195	chr16	1363205	1414751	1388978	-	protein_coding	KNOWN	UNKL	17	15	2.07662	Decile 10	Vigintile 20	Expr 50-60%
ENSG00000059377.15	ENST00000263552.10,ENST00000336425.9,ENST00000411653.5,ENST00000414041.1,ENST00000414508.6,ENST00000416849.6,ENST00000422328.5,ENST00000425687.5,ENST00000438104.5,ENST00000448866.5,ENST00000455353.5,ENST00000458722.5,ENST00000462053.5,ENST00000462275.5,ENST00000469630.1,ENST00000473948.6,ENST00000474763.5,ENST00000476637.5,ENST00000481440.5,ENST00000492560.6,ENST00000493340.5,ENST00000494876.1	782.4	562.32	15	0.99	0.84	15	0	3.64	3.22	1.52292	6.95972	0.257484	1.34564	6.15694	0.257545	chr7	139777051	140020325	139898688	+	protein_coding	KNOWN	TBXAS1	22	18	0.156005	Decile 8	Vigintile 16	Expr 20-30%
ENSG00000059378.12	ENST00000263549.7,ENST00000466597.1,ENST00000467638.1,ENST00000470515.1,ENST00000473341.5,ENST00000484111.1,ENST00000488726.5,ENST00000489383.1,ENST00000489809.5,ENST00000491598.5,ENST00000493262.1,ENST00000496624.5	2109.18	1889.08	375	7.4	6.22	375	0	7.94	7.02	6.75906	9.15279	0.0521468	6.00083	8.11727	0.0520993	chr7	140023744	140063721	140043732	-	protein_coding	KNOWN	PARP12	12	12	0.226826	Decile 8	Vigintile 16	Expr 40-50%
ENSG00000059573.8	ENST00000371221.3,ENST00000371224.6,ENST00000483788.1,ENST00000485428.1,ENST00000489386.1	3150.78	2930.67	4745	60.32	50.77	4745	0	57.68	51	55.423	60.0115	0.0135867	49.0436	53.091	0.013559	chr10	95605929	95656706	95631317	-	protein_coding	KNOWN	ALDH18A1	5	18	0.13528	Decile 8	Vigintile 15	Expr 80-90%
ENSG00000059588.9	ENST00000040877.1,ENST00000462259.5,ENST00000463793.1,ENST00000468077.5,ENST00000471918.1,ENST00000481183.1,ENST00000483404.5,ENST00000484454.1,ENST00000496673.5	2986.49	2766.38	1343	18.09	15.22	1343	0	18.36	16.24	16.8513	19.9663	0.0289888	14.8872	17.6418	0.0290181	chr1	234391313	234479103	234435208	-	protein_coding	KNOWN	TARBP1	9	30	-0.009904	Decile 7	Vigintile 14	Expr 60-70%
ENSG00000059691.11	ENST00000263985.10,ENST00000503160.5,ENST00000505211.5,ENST00000507592.5,ENST00000508611.1,ENST00000510396.1,ENST00000510720.1,ENST00000511538.5,ENST00000512306.5,ENST00000513504.1,ENST00000515490.1,ENST00000515564.5,ENST00000515812.5,ENST00000515884.5	2307.42	2087.3	806.7	14.4	12.12	806.7	1.69	16.18	14.31	14.1739	18.3841	0.0452799	12.5696	16.2971	0.0453282	chr4	151670504	151761023	151715763	-	protein_coding	KNOWN	GATB	14	13	-0.072013	Decile 7	Vigintile 13	Expr 60-70%
ENSG00000059728.10	ENST00000264444.6,ENST00000409442.2,ENST00000410000.2,ENST00000435990.5,ENST00000465446.1,ENST00000540449.5	3621.38	3401.31	98	1.07	0.9	98.02	0.15	1.5	1.32	0.921785	2.14715	0.144999	0.81592	1.89975	0.145085	chr2	69897688	69942945	69920316	+	protein_coding	KNOWN	MXD1	6	8	0.113583	Decile 8	Vigintile 15	Expr 20-30%
ENSG00000059758.7	ENST00000261211.7,ENST00000542666.5,ENST00000543119.6,ENST00000548422.1,ENST00000548734.1,ENST00000549899.1,ENST00000550971.5,ENST00000551484.1,ENST00000551816.5,ENST00000552262.1,ENST00000552496.5,ENST00000553042.1	1531.85	1311.79	402	11.42	9.61	402	0	12.13	10.73	8.98036	15.2689	0.0938196	7.96967	13.5349	0.0937732	chr12	96278261	96400560	96339410	-	protein_coding	KNOWN	CDK17	12	17	-0.235667	Decile 6	Vigintile 11	Expr 50-60%
ENSG00000059769.19	ENST00000313525.3,ENST00000447096.1,ENST00000463589.5	2403.46	2183.34	150.15	2.56	2.16	150.17	1.12	2.47	2.18	2.08969	2.87908	0.0549069	1.849	2.54744	0.0549177	chr9	111631352	111654351	111642851	+	protein_coding	KNOWN	DNAJC25	3	5	-0.032752	Decile 7	Vigintile 14	Expr 30-40%
ENSG00000059804.15	ENST00000075120.11,ENST00000469295.1,ENST00000476634.1,ENST00000479059.3,ENST00000486749.5,ENST00000490763.1,ENST00000495813.5,ENST00000541671.1,ENST00000543435.1,ENST00000544291.1,ENST00000544936.1	3278.43	3058.34	20094.5	244.77	206.01	20094.4	3.76	232.37	205.46	223.742	241.455	0.0130509	198.042	213.692	0.013022	chr12	7919230	7936275	7927752	-	protein_coding	KNOWN	SLC2A3	11	10	0.83088	Decile 10	Vigintile 19	Expr 97-98%
ENSG00000059915.16	ENST00000020673.5,ENST00000406432.5,ENST00000461698.5,ENST00000472685.5,ENST00000473507.1,ENST00000479172.5,ENST00000488194.1,ENST00000492902.2,ENST00000611678.4	2702.89	2482.78	329.33	4.94	4.16	329.38	0.62	5.28	4.67	4.40494	6.23546	0.0596757	3.90688	5.52724	0.0596405	chr10	102402617	102421539	102412078	-	protein_coding	KNOWN	PSD	9	18	1.45997	Decile 10	Vigintile 20	Expr 40-50%
ENSG00000060069.16	ENST00000075430.11,ENST00000299543.8,ENST00000585951.1,ENST00000587623.1,ENST00000590599.1,ENST00000590635.5,ENST00000591598.5,ENST00000613122.4	3380.5	3160.39	1935	22.81	19.2	1935	0.03	22.21	19.64	20.9453	23.5333	0.0201634	18.5301	20.8152	0.0201461	chr18	79679801	79756623	79718212	+	protein_coding	KNOWN	CTDP1	8	13	0.473033	Decile 9	Vigintile 18	Expr 70-80%
ENSG00000060138.12	ENST00000228251.8,ENST00000279550.11,ENST00000366286.6,ENST00000366290.2,ENST00000536107.5,ENST00000536823.5,ENST00000539204.5,ENST00000540447.5,ENST00000540747.1,ENST00000540975.5,ENST00000541351.3,ENST00000542002.5,ENST00000542641.5,ENST00000544501.1,ENST00000544504.5,ENST00000544622.4,ENST00000546164.5,ENST00000546298.5	1229.08	1008.98	6011	221.94	186.8	6011	0	222.23	196.5	202.319	247.668	0.0315934	178.929	219.032	0.031613	chr12	10699089	10723312	10711200	-	protein_coding	KNOWN	YBX3	18	10	-0.124143	Decile 7	Vigintile 13	Expr 97-98%
ENSG00000060140.8	ENST00000075503.7,ENST00000535345.5,ENST00000538867.5,ENST00000541561.1,ENST00000542562.5,ENST00000542924.1	1066.28	846.82	38	1.67	1.41	38	0	3.3	2.92	0.814979	6.63686	0.33256	0.723373	5.87232	0.332637	chr12	10618939	10674318	10646628	-	protein_coding	KNOWN	STYK1	6	11	-0.272517	Decile 5	Vigintile 10	Expr 20-30%
ENSG00000060237.16	ENST00000315939.10,ENST00000340908.8,ENST00000447667.2,ENST00000530271.6,ENST00000534872.1,ENST00000535572.5,ENST00000535698.1,ENST00000537603.1,ENST00000537687.5,ENST00000538787.1,ENST00000540360.5,ENST00000540885.1,ENST00000542424.1,ENST00000542543.1,ENST00000543065.1,ENST00000544559.1,ENST00000544965.5,ENST00000545055.1,ENST00000545285.5,ENST00000574564.1,ENST00000574679.1	3966.72	3746.64	8175	81.29	68.41	8175	0	87.92	77.74	75.5258	103.726	0.0518988	66.7927	91.6992	0.0519025	chr12	752593	911452	832022	+	protein_coding	KNOWN	WNK1	21	31	0.325806	Decile 9	Vigintile 17	Expr 91-92%
ENSG00000060339.13	ENST00000265872.10,ENST00000398676.3,ENST00000479143.2,ENST00000480627.2,ENST00000483264.1,ENST00000494903.2,ENST00000536012.5,ENST00000536391.5,ENST00000538031.5,ENST00000539250.1,ENST00000539539.5,ENST00000540210.5,ENST00000541012.5,ENST00000543225.5,ENST00000543229.5,ENST00000543706.1,ENST00000543719.5,ENST00000630771.2	2143.64	1923.56	4190	81.15	68.3	4190	0	78.31	69.25	72.2509	84.6449	0.0274843	63.9092	74.873	0.0274471	chr10	68721012	68792377	68756694	+	protein_coding	KNOWN	CCAR1	18	25	0.330743	Decile 9	Vigintile 17	Expr 91-92%
ENSG00000060491.16	ENST00000290291.10,ENST00000370461.5,ENST00000450048.1,ENST00000621591.4	2520.59	2300.47	1050	17	14.31	1050	0	16.48	14.57	15.2824	17.6967	0.0250044	13.5097	15.6438	0.0249897	chr20	62804835	62814000	62809417	+	protein_coding	KNOWN	OGFR	4	13	1.64034	Decile 10	Vigintile 20	Expr 60-70%
ENSG00000060558.3	ENST00000262958.3,ENST00000586082.1,ENST00000592455.1	2133	1912.89	5	0.1	0.08	5	0	0.27	0.24	0.072922	0.513902	0.29279	0.0618785	0.451916	0.292897	chr19	3136193	3163769	3149981	+	protein_coding	KNOWN	GNA15	3	7	1.36096	Decile 10	Vigintile 20	Expr 0-10%
ENSG00000060566.13	ENST00000078445.6,ENST00000595923.5,ENST00000598894.1,ENST00000602147.1,ENST00000602257.5	2618	2397.89	4	0.06	0.05	4	0	0.27	0.24	0.0814568	0.510833	0.280982	0.0708316	0.450705	0.28094	chr19	4153601	4173054	4163327	+	protein_coding	KNOWN	CREB3L3	5	10	1.43691	Decile 10	Vigintile 20	Expr 0-10%
ENSG00000060642.10	ENST00000078527.8,ENST00000374145.5,ENST00000430292.5,ENST00000431541.5,ENST00000455364.1,ENST00000472757.5	2209.34	1989.23	422	7.9	6.65	422	0	8.15	7.21	7.01816	9.33099	0.0489647	6.21684	8.26072	0.0489573	chr1	26787472	26798398	26792935	+	protein_coding	KNOWN	PIGV	6	5	1.04276	Decile 10	Vigintile 20	Expr 40-50%
ENSG00000060656.19	ENST00000345512.7,ENST00000373779.7,ENST00000415600.6,ENST00000428026.6,ENST00000460170.2,ENST00000465525.6,ENST00000492954.1,ENST00000493601.5,ENST00000526080.1,ENST00000527027.1,ENST00000531385.1	3352.24	3132.15	2537	30.18	25.4	2537	0	29.49	26.08	26.4023	32.6716	0.0366248	23.3648	28.9107	0.0366317	chr1	29236516	29326813	29281664	+	protein_coding	KNOWN	PTPRU	11	31	0.750685	Decile 10	Vigintile 19	Expr 70-80%
ENSG00000060688.12	ENST00000263694.8,ENST00000373720.3,ENST00000463988.1,ENST00000474025.1,ENST00000486941.1,ENST00000489853.1,ENST00000491106.1	1485.57	1265.46	2943.89	86.66	72.94	2943.89	0.31	82.68	73.1	79.2827	86.2283	0.0143885	70.1293	76.2567	0.0143411	chr1	31259568	31296782	31278175	-	protein_coding	KNOWN	SNRNP40	7	10	0.554871	Decile 9	Vigintile 18	Expr 91-92%
ENSG00000060709.13	ENST00000261655.8,ENST00000535703.5,ENST00000536002.5,ENST00000536632.1,ENST00000540658.1,ENST00000544568.2	4315.23	4095.12	7	0.06	0.05	7	0	0.32	0.28	0.0910878	0.595679	0.287382	0.0867355	0.533224	0.287394	chr12	130396137	130716281	130556209	-	protein_coding	KNOWN	RIMBP2	6	19	0.616349	Decile 9	Vigintile 18	Expr 0-10%
ENSG00000060718.19	ENST00000353414.8,ENST00000358392.6,ENST00000370096.7,ENST00000427239.5,ENST00000447608.1,ENST00000461720.5,ENST00000465209.1,ENST00000470170.1,ENST00000475980.1,ENST00000512756.5,ENST00000635193.1	4180.07	3959.97	1442	13.57	11.42	1442	0	13.99	12.37	11.7812	16.1559	0.0534463	10.458	14.3226	0.0534705	chr1	102876467	103108496	102992481	-	protein_coding	KNOWN	COL11A1	11	67	-0.629756	Decile 2	Vigintile 4	Expr 50-60%
ENSG00000060749.14	ENST00000399302.6,ENST00000524678.1,ENST00000527250.5,ENST00000527788.5,ENST00000528034.1,ENST00000528155.1	8537.61	8317.5	5193.56	23.26	19.58	5193.57	0.5	22.85	20.2	21.2919	24.5872	0.0245906	18.8213	21.7373	0.0246016	chr11	32893178	32993316	32943247	+	protein_coding	KNOWN	QSER1	6	16	0.082358	Decile 8	Vigintile 15	Expr 70-80%
ENSG00000060762.18	ENST00000341756.10,ENST00000360961.10,ENST00000366868.5,ENST00000475708.1,ENST00000487218.5,ENST00000621630.1,ENST00000621685.4	814.49	594.4	145	9.09	7.65	145	0	8.86	7.84	7.22513	10.571	0.0651207	6.39371	9.35502	0.0651173	chr6	166364919	166383013	166373966	-	protein_coding	KNOWN	MPC1	7	6	-0.258389	Decile 6	Vigintile 11	Expr 50-60%
ENSG00000060971.17	ENST00000301810.11,ENST00000333167.12,ENST00000411549.5,ENST00000418880.1,ENST00000421218.1,ENST00000423611.5,ENST00000440176.5,ENST00000447223.5,ENST00000450296.5,ENST00000451419.1,ENST00000452171.5,ENST00000460424.5,ENST00000465181.1,ENST00000469559.5,ENST00000469600.1,ENST00000480865.5,ENST00000484284.5,ENST00000489559.1,ENST00000625927.2,ENST00000627515.2	1622.03	1401.92	838.35	22.28	18.75	838.13	2.82	22.33	19.74	20.5377	24.1318	0.0275355	18.16	21.3387	0.0275042	chr3	38103129	38137242	38120185	-	protein_coding	KNOWN	ACAA1	20	13	0.519532	Decile 9	Vigintile 18	Expr 70-80%
ENSG00000060982.14	ENST00000261192.11,ENST00000342945.9,ENST00000355164.3,ENST00000538118.5,ENST00000539282.5,ENST00000539780.5,ENST00000543099.1,ENST00000544418.1,ENST00000546285.1,ENST00000612790.1	4136.93	3916.83	7811	74.29	62.53	7811	0.03	70.86	62.66	66.242	75.4959	0.0229612	58.5747	66.7593	0.022947	chr12	24810022	24949459	24879740	-	protein_coding	KNOWN	BCAT1	10	11	-0.15112	Decile 6	Vigintile 12	Expr 90-91%
ENSG00000061273.17	ENST00000080059.11,ENST00000354334.7,ENST00000380610.8,ENST00000417107.5,ENST00000417902.5,ENST00000421231.5,ENST00000422254.5,ENST00000425451.2,ENST00000427332.6,ENST00000430670.5,ENST00000433685.5,ENST00000434070.5,ENST00000440293.5,ENST00000445237.2,ENST00000447463.5,ENST00000450805.5,ENST00000459625.5,ENST00000463732.5,ENST00000470668.5,ENST00000471235.1,ENST00000477203.6,ENST00000477937.2,EN…	2985.68	2765.58	3754.3	50.57	42.56	3754.34	4.3	51.57	45.6	48.5206	54.7579	0.0208773	42.9507	48.4649	0.0208351	chr12	47782722	47833132	47807927	-	protein_coding	KNOWN	HDAC7	30	27	1.2761	Decile 10	Vigintile 20	Expr 80-90%
ENSG00000061337.15	ENST00000265801.6,ENST00000381569.5,ENST00000522290.5,ENST00000616228.1	5498.31	5278.19	647	4.57	3.84	647	0	6.65	5.88	4.09964	11.3849	0.199706	3.61888	10.0644	0.199869	chr8	20246165	20303963	20275064	-	protein_coding	KNOWN	LZTS1	4	4	0.568951	Decile 9	Vigintile 18	Expr 30-40%
ENSG00000061455.10	ENST00000407847.4,ENST00000427739.1,ENST00000434521.1,ENST00000464424.1	9267	9046.89	3	0.01	0.01	3	0	1.18	1.04	0.0489121	3.13571	0.519879	0.0429864	2.77441	0.519969	chr5	123089121	123194266	123141693	+	protein_coding	KNOWN	PRDM6	4	8	-0.312746	Decile 5	Vigintile 10	Expr 0-10%
ENSG00000061492.11	ENST00000361560.6,ENST00000398754.1,ENST00000504809.5,ENST00000506684.5	1193	972.89	9	0.34	0.29	9	0	0.39	0.34	0.184004	0.611394	0.194056	0.165258	0.543319	0.194142	chr5	138083892	138092365	138088128	+	protein_coding	KNOWN	WNT8A	4	8	0.301164	Decile 9	Vigintile 17	Expr 10-20%
ENSG00000061656.9	ENST00000374273.7,ENST00000430878.1,ENST00000454819.1,ENST00000462896.1,ENST00000463973.5,ENST00000468248.5,ENST00000498203.1	986.45	766.35	34	1.65	1.39	34	0	2.45	2.17	1.50118	3.54445	0.143154	1.30957	3.11675	0.143192	chr20	35615892	35621049	35618470	+	protein_coding	KNOWN	SPAG4	7	12	1.05677	Decile 10	Vigintile 20	Expr 20-30%
ENSG00000061676.14	ENST00000360982.2,ENST00000361354.8,ENST00000471640.1,ENST00000477988.1,ENST00000478449.5,ENST00000492058.1,ENST00000493359.1,ENST00000495619.1	3879.92	3659.82	7260	73.9	62.2	7260	0	71.46	63.19	66.788	75.972	0.0220825	59.1218	67.2474	0.0220662	chr2	182909115	183038858	182973986	-	protein_coding	KNOWN	NCKAP1	8	32	-0.355342	Decile 5	Vigintile 9	Expr 90-91%
ENSG00000061794.12	ENST00000081029.7,ENST00000536569.1,ENST00000538315.5,ENST00000542199.1,ENST00000542791.1	1885	1664.89	1020	22.82	19.21	1020	0	22.47	19.87	20.8719	24.2019	0.0248138	18.4162	21.3649	0.0247976	chr12	27710773	27756295	27733534	+	protein_coding	KNOWN	MRPS35	5	8	-0.307674	Decile 5	Vigintile 10	Expr 70-80%
ENSG00000061918.12	ENST00000264424.12,ENST00000502959.5,ENST00000503520.5,ENST00000505154.5,ENST00000505764.5,ENST00000507146.5,ENST00000513437.1	2692.23	2472.12	88	1.33	1.12	88	0	1.39	1.23	1.10143	1.69412	0.0739561	0.976038	1.50087	0.0739391	chr4	155758992	155807591	155783291	+	protein_coding	KNOWN	GUCY1B3	7	15	-0.700118	Decile 2	Vigintile 3	Expr 20-30%
ENSG00000061936.9	ENST00000261674.8,ENST00000535202.1,ENST00000535236.5,ENST00000535399.1,ENST00000537164.1,ENST00000537582.1,ENST00000538548.5,ENST00000539506.5,ENST00000540469.5,ENST00000541286.5,ENST00000542813.2	3169.1	2948.98	2198	27.77	23.37	2198	0	27.21	24.06	25.6364	28.806	0.0198659	22.7123	25.5097	0.0198353	chr12	131711081	131799737	131755409	+	protein_coding	KNOWN	SFSWAP	11	19	1.08013	Decile 10	Vigintile 20	Expr 70-80%
ENSG00000061938.16	ENST00000333602.10,ENST00000381916.6,ENST00000411741.1,ENST00000416152.5,ENST00000420716.2,ENST00000424563.5,ENST00000427576.1,ENST00000428187.5,ENST00000430929.1,ENST00000433111.1,ENST00000438207.5,ENST00000439230.5,ENST00000447060.5,ENST00000464041.5,ENST00000468680.1,ENST00000468819.1,ENST00000478623.5,ENST00000478715.1,ENST00000481865.5,ENST00000486523.1,ENST00000489628.1,ENST00000495247.5	2946.57	2726.46	1468.45	20.06	16.89	1468.38	0.81	21.48	19	19.3368	23.6609	0.034513	17.1442	20.9667	0.0345094	chr3	195863364	195911945	195887654	-	protein_coding	KNOWN	TNK2	22	15	1.11533	Decile 10	Vigintile 20	Expr 60-70%
ENSG00000061987.14	ENST00000393629.6,ENST00000393630.7,ENST00000546600.5,ENST00000546751.1,ENST00000547095.5,ENST00000547287.1,ENST00000549286.1,ENST00000549378.5,ENST00000549539.1,ENST00000551307.5,ENST00000551397.1,ENST00000552115.5,ENST00000552738.5	4738.21	4518.11	837	6.9	5.81	837	0	7.43	6.57	6.14268	8.88488	0.0635317	5.42622	7.85095	0.0635808	chr12	62466817	62600479	62533648	+	protein_coding	KNOWN	MON2	13	36	-0.325025	Decile 5	Vigintile 9	Expr 40-50%
ENSG00000062038.13	ENST00000264012.8,ENST00000429102.6,ENST00000542274.5,ENST00000565453.1,ENST00000566808.2,ENST00000567674.1,ENST00000568292.1,ENST00000569036.2,ENST00000569080.1,ENST00000569117.1	2668.34	2448.23	7778.8	118.37	99.62	7778.81	0.43	113.2	100.1	108.039	118.301	0.015604	95.6601	104.716	0.0155793	chr16	68636189	68722616	68679402	+	protein_coding	KNOWN	CDH3	10	16	1.04009	Decile 10	Vigintile 20	Expr 94-95%
ENSG00000062096.14	ENST00000359361.2,ENST00000381127.5	1991	1770.89	1	0.02	0.02	1	0	0.06	0.05	0.00559234	0.122011	0.389297	0.00478481	0.107807	0.389182	chrX	3041471	3112726	3077098	+	protein_coding	KNOWN	ARSF	2	11	0.086485	Decile 8	Vigintile 15	Expr 0-10%
ENSG00000062194.15	ENST00000264779.6,ENST00000309096.4,ENST00000424459.7,ENST00000506184.6,ENST00000511209.5,ENST00000513524.5,ENST00000513732.2,ENST00000514387.6,ENST00000515484.2	2517.3	2297.19	2844	46.12	38.82	2844	0	44.29	39.16	42.2784	46.3225	0.015874	37.4238	40.9947	0.0158819	chr5	57173948	57264679	57219313	+	protein_coding	KNOWN	GPBP1	9	13	-0.003006	Decile 7	Vigintile 14	Expr 80-90%
ENSG00000062282.14	ENST00000228027.11,ENST00000376262.7,ENST00000603276.5,ENST00000603363.5,ENST00000603865.1,ENST00000604733.5,ENST00000604935.5,ENST00000605099.1,ENST00000605608.1	2484.43	2264.32	174	2.86	2.41	172.04	2.07	3.64	3.22	2.85623	4.4855	0.0770476	2.52479	3.96701	0.07697	chr11	75759512	75801535	75780523	+	protein_coding	KNOWN	DGAT2	9	8	0.438276	Decile 9	Vigintile 17	Expr 30-40%
ENSG00000062370.16	ENST00000337401.8,ENST00000354340.8,ENST00000587909.1,ENST00000588057.1,ENST00000590687.5,ENST00000592151.1	3489.56	3269.45	90	1.03	0.86	89.41	0.89	1.6	1.41	1.05421	2.22528	0.127655	0.932799	1.9697	0.12756	chr19	44326555	44367217	44346886	-	protein_coding	KNOWN	ZNF112	6	5	0.425292	Decile 9	Vigintile 17	Expr 20-30%
ENSG00000062485.18	ENST00000351328.7,ENST00000542324.6,ENST00000546585.1,ENST00000546621.5,ENST00000546891.5,ENST00000546930.5,ENST00000547283.5,ENST00000547298.5,ENST00000547449.1,ENST00000547912.1,ENST00000548041.5,ENST00000548567.5,ENST00000548746.5,ENST00000548849.5,ENST00000549143.5,ENST00000549221.5,ENST00000550044.1,ENST00000550159.5,ENST00000550655.5,ENST00000550700.1,ENST00000550734.5,ENST00000550996.1,ENS…	2773.08	2552.96	6969.21	101.7	85.59	6969.13	1.03	101.67	89.9	97.6522	105.669	0.0133451	86.4649	93.5384	0.0133358	chr12	56271699	56300392	56286045	-	protein_coding	KNOWN	CS	33	12	1.29215	Decile 10	Vigintile 20	Expr 93-94%
ENSG00000062524.15	ENST00000263800.10,ENST00000355166.9,ENST00000453182.2,ENST00000561619.5,ENST00000563518.5,ENST00000569283.1	1235.13	1015.07	8	0.29	0.25	8	0	0.42	0.37	0.125203	0.790489	0.303937	0.108736	0.697569	0.303675	chr15	41503638	41513887	41508762	-	protein_coding	KNOWN	LTK	6	20	1.14954	Decile 10	Vigintile 20	Expr 10-20%
ENSG00000062582.13	ENST00000317534.5,ENST00000414932.1,ENST00000418740.5,ENST00000467084.1,ENST00000483330.1	708.03	487.94	1906.8	145.58	122.53	1904.29	3.93	138.07	122.08	131.734	144.178	0.0156835	116.553	127.557	0.0156952	chr7	43866558	43869893	43868225	-	protein_coding	KNOWN	MRPS24	5	4	0.58176	Decile 9	Vigintile 18	Expr 95-96%
ENSG00000062598.17	ENST00000290246.10,ENST00000352077.6,ENST00000372176.5,ENST00000396391.5,ENST00000425546.5,ENST00000450812.5,ENST00000452857.5,ENST00000460474.5,ENST00000462491.5,ENST00000462593.1,ENST00000464448.1,ENST00000467800.5,ENST00000469801.5,ENST00000480042.5,ENST00000481852.5,ENST00000487583.5,ENST00000488853.5,ENST00000497412.5	2633.07	2412.96	1292	19.95	16.79	1292	0	20.46	18.09	18.4895	22.4364	0.0329416	16.3564	19.8492	0.0328796	chr20	46366049	46432985	46399517	-	protein_coding	KNOWN	ELMO2	18	22	0.765218	Decile 10	Vigintile 19	Expr 60-70%
ENSG00000062650.17	ENST00000263070.11,ENST00000298767.9,ENST00000372075.1,ENST00000484070.1,ENST00000489996.1,ENST00000495124.1,ENST00000618527.4	4332.28	4112.2	2893	26.21	22.06	2893	0	25.34	22.4	21.501	29.0551	0.0525443	19.0412	25.7255	0.0526333	chr10	86435256	86521815	86478535	-	protein_coding	KNOWN	WAPL	7	20	-0.108843	Decile 7	Vigintile 13	Expr 70-80%
ENSG00000062716.10	ENST00000262291.8,ENST00000585847.5,ENST00000586245.5,ENST00000587259.5,ENST00000587470.1,ENST00000587945.1,ENST00000588131.1,ENST00000588617.1,ENST00000588915.1,ENST00000589823.6,ENST00000591315.5,ENST00000591782.1,ENST00000591877.1,ENST00000592106.5,ENST00000592619.5,ENST00000592790.1,ENST00000593168.5	1615.29	1395.19	1718	45.87	38.61	1718	0	48.73	43.09	42.4802	55.4294	0.0440662	37.6346	49.0907	0.0441215	chr17	59707192	59842255	59774723	+	protein_coding	KNOWN	VMP1	17	12	0.401325	Decile 9	Vigintile 17	Expr 80-90%
ENSG00000062725.9	ENST00000083182.7,ENST00000585368.1,ENST00000588668.5,ENST00000589341.5,ENST00000590244.1,ENST00000592995.1	2896.07	2675.99	524	7.29	6.14	524	0	7.23	6.39	5.48749	9.06579	0.0885518	4.87682	8.04044	0.0884042	chr17	60443149	60526219	60484684	-	protein_coding	KNOWN	APPBP2	6	13	0.216971	Decile 8	Vigintile 16	Expr 40-50%
ENSG00000062822.12	ENST00000440232.6,ENST00000593407.5,ENST00000593887.1,ENST00000593981.1,ENST00000595904.5,ENST00000596221.1,ENST00000596425.1,ENST00000596648.1,ENST00000597963.5,ENST00000599857.5,ENST00000600746.1,ENST00000600859.5,ENST00000601098.5,ENST00000613923.4	1644.07	1424.02	4878	127.61	107.41	4875.27	2.83	121.53	107.46	113.663	129.434	0.0221843	100.558	114.483	0.0221882	chr19	50384204	50418018	50401111	+	protein_coding	KNOWN	POLD1	14	27	1.68596	Decile 10	Vigintile 20	Expr 94-95%
ENSG00000063015.19	ENST00000317338.16,ENST00000335960.10,ENST00000360295.13,ENST00000442608.7,ENST00000535262.1,ENST00000539265.1,ENST00000540419.5,ENST00000540632.6,ENST00000544224.2,ENST00000585644.1	2341.8	2121.7	768	13.48	11.35	768	0	12.98	11.48	10.8943	15.1932	0.0560959	9.65615	13.4606	0.0560285	chr17	28954901	29006440	28980670	-	protein_coding	KNOWN	SEZ6	10	18	1.35195	Decile 10	Vigintile 20	Expr 50-60%
ENSG00000063046.17	ENST00000262056.13,ENST00000416762.7,ENST00000420463.7,ENST00000549077.5,ENST00000549481.5,ENST00000549592.1,ENST00000549645.5,ENST00000550025.1,ENST00000550390.1,ENST00000550704.5,ENST00000551002.5,ENST00000551527.5,ENST00000552490.5,ENST00000553209.1	2744.1	2524	26474.3	390.76	328.88	26473.9	9.72	372.22	329.12	363.184	381.285	0.00839602	321.34	337.259	0.0083213	chr12	53006158	53042209	53024183	+	protein_coding	KNOWN	EIF4B	14	15	0.830477	Decile 10	Vigintile 19	Expr 98-99%
ENSG00000063127.15	ENST00000335875.8,ENST00000454748.7,ENST00000594180.1,ENST00000594917.1,ENST00000597969.5,ENST00000598221.1,ENST00000598828.1	1159.19	939.17	28	1.11	0.93	28	0	1.71	1.51	0.863156	2.62971	0.183357	0.762393	2.3254	0.183341	chr19	49289638	49325225	49307431	-	protein_coding	KNOWN	SLC6A16	7	12	1.3395	Decile 10	Vigintile 20	Expr 20-30%
ENSG00000063169.10	ENST00000396720.7,ENST00000594866.1,ENST00000602258.1,ENST00000614245.1	2977.79	2757.72	1293	17.47	14.7	1293	0	16.76	14.82	14.59	18.9979	0.0458083	12.9216	16.8185	0.0457936	chr19	47608196	47703277	47655736	+	protein_coding	KNOWN	GLTSCR1	4	15	1.2823	Decile 10	Vigintile 20	Expr 60-70%
ENSG00000063176.15	ENST00000245222.8,ENST00000340932.7,ENST00000426514.2,ENST00000593308.1,ENST00000597434.5,ENST00000598088.5,ENST00000598574.1,ENST00000599029.2,ENST00000599033.1,ENST00000599748.5,ENST00000600537.5,ENST00000601704.1,ENST00000601712.5	2118.85	1898.74	1726.18	33.87	28.51	1726.28	5.45	32.72	28.93	30.6459	34.7937	0.0217767	27.1051	30.7738	0.0217395	chr19	48619291	48630717	48625004	+	protein_coding	KNOWN	SPHK2	13	7	2.00929	Decile 10	Vigintile 20	Expr 70-80%
ENSG00000063177.12	ENST00000084795.9,ENST00000546623.5,ENST00000547892.1,ENST00000547897.5,ENST00000549273.5,ENST00000549370.5,ENST00000549533.1,ENST00000549920.5,ENST00000550645.5,ENST00000550671.1,ENST00000550973.5,ENST00000551749.5,ENST00000552347.5,ENST00000552588.5,ENST00000552705.5,ENST00000552851.1	628.53	408.47	19200.1	1751.1	1473.82	19200.1	0.97	1657.76	1465.79	1631.18	1685.44	0.00565558	1443.04	1490.46	0.00559208	chr19	48615328	48619536	48617432	-	protein_coding	KNOWN	RPL18	16	7	2.01411	Decile 10	Vigintile 20	Expr 99-100%
ENSG00000063180.8	ENST00000084798.8,ENST00000594088.1,ENST00000596080.1,ENST00000599267.1	1416.52	1196.49	2871	89.39	75.24	2871	0	85.95	76	78.1236	94.1709	0.032066	69.0158	83.1937	0.03205	chr19	48637942	48646312	48642127	-	protein_coding	KNOWN	CA11	4	9	1.93745	Decile 10	Vigintile 20	Expr 92-93%
ENSG00000063241.7	ENST00000085068.7,ENST00000425675.6,ENST00000438389.6,ENST00000587226.5,ENST00000589080.1,ENST00000589108.1,ENST00000590921.1,ENST00000591718.1	1088.35	868.24	1730	74.23	62.48	1730	0	70.66	62.48	67.1823	74.0963	0.016862	59.5161	65.6223	0.0168413	chr19	55452985	55462343	55457664	-	protein_coding	KNOWN	ISOC2	8	6	1.53922	Decile 10	Vigintile 20	Expr 90-91%
ENSG00000063244.12	ENST00000308924.8,ENST00000450554.6,ENST00000587196.2,ENST00000587275.1,ENST00000588850.5,ENST00000590551.1,ENST00000592867.1,ENST00000592874.1	1698.25	1478.15	9162	230.91	194.35	9162	0.03	219.22	193.84	212.435	225.928	0.0105776	188.045	199.962	0.0105412	chr19	55654146	55674715	55664430	+	protein_coding	KNOWN	U2AF2	8	12	1.67842	Decile 10	Vigintile 20	Expr 97-98%
ENSG00000063245.14	ENST00000085079.11,ENST00000270460.10,ENST00000411543.6,ENST00000586194.1,ENST00000587937.1,ENST00000589704.1,ENST00000591743.1	2005.21	1785.12	5365	111.96	94.23	5364.52	0.6	107.51	95.06	102.562	112.566	0.015739	90.7741	99.6149	0.0156851	chr19	55675226	55709858	55692542	+	protein_coding	KNOWN	EPN1	7	11	1.71694	Decile 10	Vigintile 20	Expr 93-94%
ENSG00000063322.13	ENST00000315588.9,ENST00000594368.5,ENST00000596297.1,ENST00000599213.6,ENST00000599417.1,ENST00000600973.5,ENST00000615911.4	3627.05	3406.93	1676	18.33	15.42	1676	0	18.04	15.95	16.9966	19.1159	0.01985	15.0413	16.9137	0.0198328	chr19	39391303	39400637	39395970	+	protein_coding	KNOWN	MED29	7	4	1.51453	Decile 10	Vigintile 20	Expr 60-70%
ENSG00000063438.16	ENST00000316418.9,ENST00000504625.1,ENST00000505113.5,ENST00000506456.1,ENST00000507048.1,ENST00000510400.5,ENST00000510910.1,ENST00000511487.1,ENST00000512529.5,ENST00000514523.1,ENST00000515206.5	4305.55	4085.43	45	0.41	0.35	45	0	1.38	1.22	0.725802	2.11157	0.174785	0.647006	1.87311	0.174796	chr5	304176	438291	371233	+	protein_coding	KNOWN	AHRR	11	12	1.1004	Decile 10	Vigintile 20	Expr 10-20%
ENSG00000063515.2	ENST00000086933.2	1033	812.89	5	0.23	0.19	5	0	0.26	0.23	0.0751791	0.470834	0.2739	0.0696972	0.419628	0.273839	chr22	19148576	19150283	19149429	-	protein_coding	KNOWN	GSC2	1	3	1.31	Decile 10	Vigintile 20	Expr 10-20%
ENSG00000063587.13	ENST00000370249.2,ENST00000370251.3,ENST00000438239.1	6138.93	5918.81	717	4.51	3.8	717	0	4.38	3.87	3.98274	4.78623	0.030892	3.52289	4.23464	0.0308862	chrX	153334155	153360110	153347132	+	protein_coding	KNOWN	ZNF275	3	5	0.311118	Decile 9	Vigintile 17	Expr 30-40%
ENSG00000063601.16	ENST00000370387.2,ENST00000370390.7,ENST00000429965.6,ENST00000434699.6,ENST00000436701.5,ENST00000438018.5,ENST00000439546.6,ENST00000445323.6,ENST00000485376.5,ENST00000488357.1,ENST00000490316.6,ENST00000493480.1,ENST00000493995.6,ENST00000542156.5	3743.35	3523.23	969	10.25	8.62	969	0	10.96	9.69	9.72272	12.2819	0.0395365	8.61116	10.8734	0.0395376	chrX	150692971	150765103	150729037	+	protein_coding	KNOWN	MTMR1	14	17	0.181284	Decile 8	Vigintile 16	Expr 50-60%
ENSG00000063660.8	ENST00000264039.6,ENST00000420138.5,ENST00000425056.5,ENST00000426280.3,ENST00000427506.5,ENST00000455111.1,ENST00000466624.1,ENST00000469694.5,ENST00000495100.1	3676.79	3456.67	2003	21.59	18.17	2003	0	21.28	18.81	20.1173	22.4381	0.0185303	17.7986	19.8426	0.0185206	chr2	240435671	240468078	240451874	+	protein_coding	KNOWN	GPC1	9	9	1.37817	Decile 10	Vigintile 20	Expr 70-80%
ENSG00000063761.15	ENST00000238561.9,ENST00000341211.5,ENST00000393639.8,ENST00000555217.1,ENST00000555333.1,ENST00000556048.5,ENST00000556560.5,ENST00000557501.5	2022.78	1802.67	474	9.8	8.24	474	0	9.84	8.7	8.72027	10.9884	0.0391822	7.70569	9.70989	0.0392233	chr14	77800083	77935012	77867547	+	protein_coding	KNOWN	ADCK1	8	11	0.097142	Decile 8	Vigintile 15	Expr 50-60%
ENSG00000063854.12	ENST00000397353.6,ENST00000397356.7,ENST00000455446.6,ENST00000564445.5,ENST00000564518.5,ENST00000565097.1,ENST00000566644.5,ENST00000566709.5,ENST00000567190.5,ENST00000567398.1,ENST00000569339.1,ENST00000569700.5	1094.51	874.41	520	22.15	18.65	520	0	21.94	19.4	19.2772	24.623	0.0420166	17.0578	21.7824	0.0420942	chr16	1795620	1827194	1811407	-	protein_coding	KNOWN	HAGH	12	10	1.88784	Decile 10	Vigintile 20	Expr 70-80%
ENSG00000063978.15	ENST00000314289.12,ENST00000502316.5,ENST00000503123.5,ENST00000503659.5,ENST00000504224.5,ENST00000504782.5,ENST00000506706.5,ENST00000507247.5,ENST00000507784.5,ENST00000508235.1,ENST00000509206.1,ENST00000509258.5,ENST00000509388.5,ENST00000511600.5,ENST00000511843.5,ENST00000511859.5,ENST00000511892.5,ENST00000513284.5,ENST00000513450.1,ENST00000513578.5,ENST00000513643.5,ENST00000541204.5	2817.4	2597.29	3179	45.6	38.38	3179.01	0.08	46.43	41.06	43.6358	49.2736	0.0208771	38.647	43.6241	0.0208959	chr4	2462220	2625320	2543770	+	protein_coding	KNOWN	RNF4	22	9	0.926067	Decile 10	Vigintile 19	Expr 80-90%
ENSG00000064012.21	ENST00000264274.13,ENST00000264275.9,ENST00000323492.11,ENST00000339403.6,ENST00000358485.8,ENST00000392258.7,ENST00000392263.6,ENST00000392266.7,ENST00000413726.5,ENST00000424461.5,ENST00000429881.1,ENST00000432109.6,ENST00000437283.5,ENST00000440732.5,ENST00000444430.2,ENST00000447616.5,ENST00000450491.5,ENST00000471383.5,ENST00000490412.5,ENST00000490682.5	1628.82	1408.72	84	2.22	1.87	84	0	5.94	5.25	2.68384	10.9493	0.241282	2.37352	9.68634	0.241473	chr2	201233443	201287711	201260577	+	protein_coding	KNOWN	CASP8	20	10	0.102487	Decile 8	Vigintile 15	Expr 30-40%
ENSG00000064042.17	ENST00000313860.11,ENST00000381753.8,ENST00000396595.7,ENST00000446625.6,ENST00000503057.5,ENST00000505705.1,ENST00000508466.1,ENST00000508501.5,ENST00000509277.5,ENST00000509454.5,ENST00000509638.5,ENST00000511424.5,ENST00000511496.5,ENST00000512228.5,ENST00000512632.5,ENST00000512820.5,ENST00000512946.5,ENST00000513024.5,ENST00000514096.5,ENST00000514190.5,ENST00000515785.1,ENST00000515847.1	3851.64	3631.53	278	2.85	2.4	278	0	3.96	3.5	2.89381	5.04024	0.0953999	2.57141	4.47035	0.0954059	chr4	41359607	41700044	41529825	+	protein_coding	KNOWN	LIMCH1	22	32	-0.152091	Decile 6	Vigintile 12	Expr 30-40%
ENSG00000064102.14	ENST00000261191.11,ENST00000536232.1,ENST00000537336.1,ENST00000538016.1,ENST00000538155.5,ENST00000538727.5,ENST00000538748.1,ENST00000542392.4,ENST00000544548.5	2888.17	2668.06	1527	21.32	17.95	1527	0	22.2	19.63	20.4398	24.1299	0.0283916	18.1067	21.3691	0.0283657	chr12	26905181	26938326	26921753	-	protein_coding	KNOWN	ASUN	9	17	-0.19344	Decile 6	Vigintile 12	Expr 60-70%
ENSG00000064115.10	ENST00000343028.8,ENST00000512808.2,ENST00000535260.5,ENST00000535423.5,ENST00000535819.1,ENST00000537406.1,ENST00000539399.1,ENST00000539741.5,ENST00000541081.1,ENST00000542019.1,ENST00000542667.5,ENST00000543088.5,ENST00000543655.5,ENST00000543803.5,ENST00000543882.5,ENST00000544179.1,ENST00000545303.5,ENST00000545344.5,ENST00000545600.1	1605.55	1385.55	1879	50.52	42.52	1879	0	51.85	45.84	45.1007	58.6061	0.0442304	39.9258	51.8647	0.0442157	chr12	26973195	27014434	26993814	-	protein_coding	KNOWN	TM7SF3	19	12	-0.150756	Decile 6	Vigintile 12	Expr 80-90%
ENSG00000064195.7	ENST00000434704.2,ENST00000512495.2	2602	2381.89	12	0.19	0.16	12	0	0.29	0.26	0.115168	0.495804	0.228216	0.10478	0.441382	0.228186	chr17	49990005	49995224	49992614	-	protein_coding	KNOWN	DLX3	2	3	1.18348	Decile 10	Vigintile 20	Expr 10-20%
ENSG00000064199.6	ENST00000227135.6,ENST00000524614.1,ENST00000529498.1,ENST00000532692.1	1112.12	892.01	101	4.22	3.55	101	0	4.3	3.8	3.32975	5.31059	0.079473	2.94452	4.69562	0.0793923	chr11	124673798	124697518	124685658	+	protein_coding	KNOWN	SPA17	4	5	0.148969	Decile 8	Vigintile 16	Expr 30-40%
ENSG00000064201.15	ENST00000182290.8,ENST00000339046.8,ENST00000381117.1,ENST00000381121.7,ENST00000437313.1,ENST00000446063.6,ENST00000451520.6,ENST00000461200.5,ENST00000479508.5,ENST00000483227.5,ENST00000484104.5,ENST00000484523.1,ENST00000486011.1,ENST00000493924.5,ENST00000493948.5,ENST00000498313.5,ENST00000612299.4	3325	3104.89	1	0.01	0.01	1	0	0.99	0.88	0.483962	1.56503	0.191283	0.428461	1.38472	0.19125	chr11	2301997	2318200	2310098	+	protein_coding	KNOWN	TSPAN32	17	10	0.996822	Decile 10	Vigintile 19	Expr 0-10%
ENSG00000064205.10	ENST00000190983.4,ENST00000372865.4,ENST00000372868.6,ENST00000465000.1,ENST00000471629.1,ENST00000497421.1	1518	1297.89	1	0.03	0.02	1	0	0.2	0.18	0.0563619	0.368946	0.276038	0.0498433	0.326374	0.275977	chr20	44714844	44728509	44721676	+	protein_coding	KNOWN	WISP2	6	5	0.623858	Decile 9	Vigintile 18	Expr 0-10%
ENSG00000064218.4	ENST00000190165.2,ENST00000417254.1	2183	1962.89	3	0.06	0.05	3	0	0.2	0.18	0.02666	0.466823	0.407878	0.0238272	0.413109	0.40788	chr9	976964	991731	984347	+	protein_coding	KNOWN	DMRT3	2	2	0.251738	Decile 8	Vigintile 16	Expr 0-10%
ENSG00000064225.12	ENST00000265261.10,ENST00000394162.5,ENST00000460774.5,ENST00000462152.5,ENST00000465004.1,ENST00000466482.5,ENST00000468553.5,ENST00000469105.5,ENST00000474595.1,ENST00000476833.5,ENST00000477574.5,ENST00000477899.5,ENST00000480133.1,ENST00000483910.5,ENST00000485145.1,ENST00000485391.5,ENST00000486249.5,ENST00000486334.6,ENST00000489112.5,ENST00000490684.1,ENST00000491912.1,ENST00000492254.5,EN…	1827.45	1607.34	156.58	3.63	3.05	156.47	0.5	6.47	5.72	4.93028	8.14528	0.0846098	4.34528	7.18879	0.0846407	chr3	98732236	98821201	98776718	+	protein_coding	KNOWN	ST3GAL6	28	11	-0.462958	Decile 4	Vigintile 7	Expr 30-40%
ENSG00000064270.12	ENST00000262429.8,ENST00000416219.6,ENST00000420010.6,ENST00000563340.1,ENST00000564099.1,ENST00000565546.5,ENST00000565631.5,ENST00000565927.1,ENST00000566874.1,ENST00000567222.1,ENST00000567629.1,ENST00000567892.5,ENST00000568160.1,ENST00000569207.5,ENST00000624933.1	2300.01	2079.95	99.45	1.78	1.5	100.03	1.36	3.58	3.16	2.21805	5.12669	0.140323	1.96489	4.53827	0.140288	chr16	84368527	84464187	84416357	+	protein_coding	KNOWN	ATP2C2	15	28	0.620805	Decile 9	Vigintile 18	Expr 20-30%
ENSG00000064300.8	ENST00000172229.7,ENST00000504201.1,ENST00000509200.5	3356.25	3136.14	549.81	6.53	5.5	549.67	0.57	6.3	5.57	5.74262	6.88881	0.0315052	5.07947	6.09286	0.0314744	chr17	49495293	49515017	49505155	+	protein_coding	KNOWN	NGFR	3	6	0.958758	Decile 10	Vigintile 19	Expr 40-50%
ENSG00000064309.14	ENST00000263577.11,ENST00000392693.7,ENST00000525625.1,ENST00000527967.5,ENST00000531586.5,ENST00000531738.5,ENST00000531830.1,ENST00000534661.5,ENST00000534818.1	4223.86	4003.75	1141.88	10.62	8.94	1141.75	7.08	10.72	9.48	9.29935	12.1872	0.0459739	8.22143	10.778	0.0459939	chr11	125955796	126063335	126009565	-	protein_coding	KNOWN	CDON	9	20	0.149681	Decile 8	Vigintile 16	Expr 50-60%
ENSG00000064313.11	ENST00000378164.6,ENST00000519355.5,ENST00000521007.1,ENST00000523078.1,ENST00000523098.1,ENST00000523734.1,ENST00000523904.1,ENST00000526969.1,ENST00000529653.1	3116.94	2896.83	1122	14.43	12.14	1122	0	15.03	13.29	12.6175	17.4275	0.0571638	11.2256	15.4809	0.0571052	chr8	119730775	119832863	119781819	-	protein_coding	KNOWN	TAF2	9	26	-0.589862	Decile 2	Vigintile 4	Expr 60-70%
ENSG00000064393.15	ENST00000342645.7,ENST00000406875.7,ENST00000428878.6	13207.5	12987.4	2016	5.78	4.87	2016	0	5.55	4.91	5.18074	5.92353	0.0229815	4.58204	5.23818	0.0229582	chr7	139561570	139777778	139669674	-	protein_coding	KNOWN	HIPK2	3	15	0.284385	Decile 9	Vigintile 17	Expr 40-50%
ENSG00000064419.13	ENST00000265388.9,ENST00000471166.1,ENST00000471234.5,ENST00000482320.5,ENST00000627585.2	4091.32	3871.21	6579	63.31	53.29	6579	0	59.77	52.85	58.1585	61.4232	0.00955404	51.4978	54.3725	0.00945591	chr7	128954180	129055173	129004676	-	protein_coding	KNOWN	TNPO3	5	24	0.240426	Decile 8	Vigintile 16	Expr 80-90%
ENSG00000064489.22	ENST00000354191.8,ENST00000444486.7,ENST00000514819.7,ENST00000602276.5,ENST00000602438.1,ENST00000602689.1,ENST00000602804.5,ENST00000630940.2	993.86	773.79	105.48	5.08	4.27	98.99	11.29	5.46	4.83	3.40083	7.6429	0.13709	2.99344	6.74723	0.137036	chr19	19145567	19192158	19168862	-	protein_coding	KNOWN	BORCS8-MEF2B	8	13	1.36262	Decile 10	Vigintile 20	Expr 40-50%
ENSG00000064490.13	ENST00000303088.8,ENST00000392324.8,ENST00000407360.7,ENST00000421262.7,ENST00000456252.7,ENST00000535017.1,ENST00000536253.1,ENST00000540977.1,ENST00000540981.5,ENST00000541873.6,ENST00000543118.1,ENST00000543157.7,ENST00000544923.5,ENST00000545522.2,ENST00000593273.5	670.14	450.14	1114.2	92.21	77.61	1114.43	2.17	88.94	78.64	81.2347	96.5632	0.0297587	71.8988	85.4532	0.0297627	chr19	19192229	19201869	19197049	+	protein_coding	KNOWN	RFXANK	15	10	1.59075	Decile 10	Vigintile 20	Expr 92-93%
ENSG00000064545.14	ENST00000162044.13,ENST00000450333.6,ENST00000586357.1,ENST00000587096.5,ENST00000587406.5,ENST00000587583.6,ENST00000587915.1,ENST00000587925.5,ENST00000587985.6,ENST00000589448.5,ENST00000590216.6,ENST00000591031.6,ENST00000591443.1,ENST00000592147.1,ENST00000592369.1	1632.26	1412.16	1324	34.93	29.4	1324	0	35.38	31.29	32.4402	38.5753	0.0303185	28.6633	34.0943	0.0302943	chr19	19119169	19138513	19128841	-	protein_coding	KNOWN	TMEM161A	15	12	1.59052	Decile 10	Vigintile 20	Expr 70-80%
ENSG00000064547.13	ENST00000407877.7,ENST00000542587.5,ENST00000586703.1,ENST00000588233.1,ENST00000588461.1,ENST00000589311.1,ENST00000590629.1,ENST00000591042.1,ENST00000592061.1	1395.71	1175.62	1537	48.71	40.99	1537	0	47.19	41.72	43.899	50.4763	0.0238164	38.8797	44.6906	0.0238042	chr19	19623668	19628930	19626299	-	protein_coding	KNOWN	LPAR2	9	6	0.999214	Decile 10	Vigintile 19	Expr 80-90%
ENSG00000064601.16	ENST00000191018.9,ENST00000354880.9,ENST00000372459.6,ENST00000372484.7,ENST00000419493.2,ENST00000480961.1,ENST00000484855.2,ENST00000485627.1,ENST00000493522.6,ENST00000606000.1,ENST00000606066.1,ENST00000606394.5,ENST00000606782.1,ENST00000606788.5,ENST00000607187.1,ENST00000607212.1,ENST00000607482.5,ENST00000607814.5,ENST00000607841.5	1694.4	1474.29	1709.77	43.2	36.36	1711.16	4.78	43.04	38.06	40.2136	45.8596	0.0227397	35.5254	40.5128	0.022697	chr20	45890144	45898820	45894482	+	protein_coding	KNOWN	CTSA	19	15	1.59383	Decile 10	Vigintile 20	Expr 80-90%
ENSG00000064607.16	ENST00000330854.15,ENST00000337018.10,ENST00000452918.6,ENST00000593795.5,ENST00000594445.1,ENST00000594773.5,ENST00000597095.5,ENST00000597163.5,ENST00000597280.5,ENST00000598202.1,ENST00000598240.1,ENST00000598863.1,ENST00000600239.5,ENST00000600377.1,ENST00000601879.5	3613.93	3393.84	6475.01	71.08	59.82	6475.07	0.54	68.35	60.44	64.3754	72.591	0.0202911	56.9582	64.2193	0.0203037	chr19	18990888	19034023	19012455	-	protein_coding	KNOWN	SUGP2	15	13	1.30391	Decile 10	Vigintile 20	Expr 80-90%
ENSG00000064651.13	ENST00000262461.6,ENST00000343225.4,ENST00000502849.1,ENST00000504416.5,ENST00000507791.5,ENST00000509205.5,ENST00000509616.1,ENST00000628403.2	5906.77	5686.66	585	3.83	3.23	585	0	4.59	4.06	3.69401	5.62791	0.0747355	3.26272	4.97368	0.074763	chr5	128083766	128189688	128136727	+	protein_coding	KNOWN	SLC12A2	8	27	-0.50813	Decile 3	Vigintile 6	Expr 30-40%
ENSG00000064652.10	ENST00000261369.8,ENST00000395451.8,ENST00000502387.5,ENST00000503149.5,ENST00000506996.5,ENST00000507364.5,ENST00000510914.5,ENST00000511211.5,ENST00000511545.5,ENST00000513613.5,ENST00000513881.5,ENST00000515729.1	1763.35	1543.25	300	7.24	6.1	300	0	8.4	7.42	6.93844	9.96082	0.0624204	6.11872	8.7924	0.0623907	chr5	122843439	123029354	122936396	+	protein_coding	KNOWN	SNX24	12	8	-0.364945	Decile 5	Vigintile 9	Expr 40-50%
ENSG00000064655.18	ENST00000317304.10,ENST00000327619.9,ENST00000357410.7,ENST00000458636.2,ENST00000471081.1,ENST00000475856.1,ENST00000479843.5,ENST00000497062.6,ENST00000497428.1,ENST00000611592.4	2105.46	1885.36	95	1.88	1.58	95	0	16.01	14.16	1.75955	43.3492	0.544155	1.56573	38.359	0.54416	chr20	46894624	47188844	47041734	+	protein_coding	KNOWN	EYA2	10	16	0.378456	Decile 9	Vigintile 17	Expr 20-30%
ENSG00000064666.14	ENST00000263097.8,ENST00000348419.7,ENST00000562015.5,ENST00000562075.6,ENST00000562958.6,ENST00000564572.1,ENST00000565096.6,ENST00000566695.5,ENST00000568865.2,ENST00000569352.6,ENST00000606983.5,ENST00000607102.1	1841.63	1621.52	13536.9	311.01	261.76	13537.4	20.18	295.8	261.55	287.509	304.637	0.0100364	254.302	269.393	0.0100321	chr19	1026581	1039068	1032824	+	protein_coding	KNOWN	CNN2	12	7	2.30981	Decile 10	Vigintile 20	Expr 98-99%
ENSG00000064687.12	ENST00000263094.10,ENST00000433129.5,ENST00000435683.6,ENST00000524383.1,ENST00000524850.5,ENST00000525073.6,ENST00000525238.2,ENST00000525939.1,ENST00000526885.5,ENST00000527496.1,ENST00000529442.6,ENST00000530092.2,ENST00000530703.1,ENST00000531467.5,ENST00000531478.5,ENST00000532194.2,ENST00000533574.1,ENST00000611490.4,ENST00000612569.1	2445.66	2225.6	1310.79	21.94	18.47	1310.81	0.4	23.72	20.97	19.5449	27.8328	0.0611168	17.3287	24.659	0.0610691	chr19	1040101	1065572	1052836	+	protein_coding	KNOWN	ABCA7	19	47	2.16396	Decile 10	Vigintile 20	Expr 70-80%
ENSG00000064692.18	ENST00000261367.11,ENST00000261368.12,ENST00000379538.7,ENST00000395466.6,ENST00000395469.6,ENST00000414317.6,ENST00000504884.6,ENST00000506272.5,ENST00000508017.5,ENST00000508681.5,ENST00000509023.5,ENST00000509154.6,ENST00000509652.1,ENST00000510003.5,ENST00000510658.5,ENST00000512146.6,ENST00000512385.5,ENST00000513719.1,ENST00000514467.5,ENST00000514497.6,ENST00000515215.6,ENST00000542191.5	2049.86	1829.79	297	6.05	5.09	297	0	6.8	6.01	5.28229	8.39156	0.0798648	4.68285	7.43426	0.0799103	chr5	122311354	122464219	122387786	+	protein_coding	KNOWN	SNCAIP	22	14	-0.351167	Decile 5	Vigintile 9	Expr 40-50%
ENSG00000064703.11	ENST00000369702.4,ENST00000475700.1,ENST00000524894.1,ENST00000533164.5,ENST00000534200.1	4212.47	3992.35	1029.94	9.61	8.09	1029.93	0.25	9.68	8.56	8.83661	10.5897	0.0298478	7.82383	9.37541	0.0298553	chr1	111755245	111768016	111761630	+	protein_coding	KNOWN	DDX20	5	11	0.296103	Decile 9	Vigintile 17	Expr 50-60%
ENSG00000064726.9	ENST00000261721.8,ENST00000379403.2,ENST00000558344.1,ENST00000559652.5,ENST00000560015.1	2625.71	2405.6	947	14.67	12.34	947	0	14.3	12.64	12.886	15.7613	0.0347069	11.4197	13.9619	0.0346816	chr15	83016422	83067354	83041888	-	protein_coding	KNOWN	BTBD1	5	8	0.159664	Decile 8	Vigintile 16	Expr 60-70%
ENSG00000064763.10	ENST00000182377.8,ENST00000536681.7,ENST00000547116.5,ENST00000547411.1,ENST00000547759.1,ENST00000549080.1,ENST00000550541.1,ENST00000551193.1,ENST00000551451.5,ENST00000552137.1	2181.7	1961.61	825	15.67	13.19	824.99	0.08	15.97	14.12	13.2569	18.6371	0.0598299	11.7673	16.5274	0.0598576	chr12	29149103	29340980	29245041	+	protein_coding	KNOWN	FAR2	10	12	-0.185856	Decile 6	Vigintile 12	Expr 60-70%
ENSG00000064787.12	ENST00000371435.6,ENST00000371440.7,ENST00000395961.7,ENST00000422805.1,ENST00000448484.5	2880.97	2660.86	15.16	0.21	0.18	15.23	0.42	0.31	0.27	0.157459	0.487276	0.183865	0.13745	0.429232	0.183825	chr20	53936777	54070594	54003685	-	protein_coding	KNOWN	BCAS1	5	12	-0.189221	Decile 6	Vigintile 12	Expr 10-20%
ENSG00000064835.10	ENST00000344265.7,ENST00000350375.6,ENST00000560656.1,ENST00000561167.5	984.25	764.16	0	0	0	0	0	0.23	0.2	0.0334132	0.473376	0.357385	0.0296406	0.418861	0.357482	chr3	87259404	87276587	87267995	-	protein_coding	KNOWN	POU1F1	4	6	-0.706512	Decile 1	Vigintile 2	Non-expressed
ENSG00000064886.13	ENST00000369744.6,ENST00000369748.8,ENST00000445067.6,ENST00000466741.5,ENST00000467038.6,ENST00000472825.2,ENST00000474304.6,ENST00000477185.6,ENST00000486561.6,ENST00000497220.5,ENST00000497587.6,ENST00000524472.5,ENST00000526684.1,ENST00000528451.5,ENST00000529459.1,ENST00000530597.1,ENST00000533831.6	1435	1214.89	1	0.03	0.03	1	0	1.44	1.27	0.657109	2.29143	0.197996	0.582746	2.02888	0.197828	chr1	111200771	111243440	111222105	+	protein_coding	KNOWN	CHI3L2	17	13	0.259066	Decile 8	Vigintile 16	Expr 0-10%
ENSG00000064932.15	ENST00000361757.7,ENST00000438103.6,ENST00000586109.1,ENST00000587024.5,ENST00000587655.2,ENST00000587673.5,ENST00000590176.5,ENST00000590446.2,ENST00000590998.5,ENST00000592222.5	3669.41	3449.32	1742	18.81	15.84	1742	0	19.33	17.09	16.9567	21.7712	0.0430883	15.0221	19.2775	0.0430725	chr19	1107636	1174283	1140959	-	protein_coding	KNOWN	SBNO2	10	32	2.14923	Decile 10	Vigintile 20	Expr 60-70%
ENSG00000064933.16	ENST00000342075.8,ENST00000374826.8,ENST00000409593.5,ENST00000409823.7,ENST00000409985.5,ENST00000418224.7,ENST00000420421.1,ENST00000421722.5,ENST00000424059.1,ENST00000424307.5,ENST00000424766.5,ENST00000432292.7,ENST00000441310.6,ENST00000446877.5,ENST00000447232.6,ENST00000447734.5,ENST00000450931.5,ENST00000452382.1,ENST00000483293.1,ENST00000618056.4,ENST00000624204.3	2343.5	2123.39	871	15.28	12.86	871	0	16.28	14.39	14.3544	18.3517	0.0421349	12.6845	16.2213	0.0421923	chr2	189784085	189877629	189830857	+	protein_coding	KNOWN	PMS1	21	13	-0.266978	Decile 5	Vigintile 10	Expr 60-70%
ENSG00000064961.18	ENST00000262949.7,ENST00000333651.10,ENST00000416526.5,ENST00000417382.5,ENST00000435022.5,ENST00000453933.5,ENST00000461099.1,ENST00000464304.1,ENST00000470356.3,ENST00000483417.1,ENST00000486028.1,ENST00000487894.5,ENST00000488973.6,ENST00000493191.1,ENST00000585741.1,ENST00000585900.1	1585.73	1365.62	1631	44.49	37.45	1631	0.03	44.19	39.07	41.5139	46.9233	0.0211511	36.7509	41.5307	0.0211782	chr19	3572777	3579088	3575932	+	protein_coding	KNOWN	HMG20B	16	10	1.99448	Decile 10	Vigintile 20	Expr 80-90%
ENSG00000064989.12	ENST00000392370.7,ENST00000409998.5,ENST00000410068.5,ENST00000410102.5,ENST00000447403.5,ENST00000461244.5,ENST00000474212.5,ENST00000479784.1,ENST00000485973.1	2846.21	2626.1	85	1.21	1.01	85	0	1.78	1.57	1.20361	2.41684	0.118228	1.05986	2.13347	0.118102	chr2	187343129	187448460	187395794	-	protein_coding	KNOWN	CALCRL	9	16	-0.863357	Decile 1	Vigintile 1	Expr 20-30%
ENSG00000064995.16	ENST00000361288.8,ENST00000420584.3	1568.62	1348.5	1242	34.31	28.88	1242	0	32.54	28.77	30.7203	34.326	0.0191237	27.1738	30.3642	0.0191272	chr6	34877778	34888089	34882933	-	protein_coding	KNOWN	TAF11	2	5	0.611861	Decile 9	Vigintile 18	Expr 70-80%
ENSG00000064999.13	ENST00000360359.4,ENST00000470698.1	6316.47	6096.36	2457	15.01	12.64	2457	0	14.29	12.63	13.6987	14.8807	0.0143313	12.1277	13.1725	0.0143434	chr6	34889265	35091413	34990339	+	protein_coding	KNOWN	ANKS1A	2	24	0.646822	Decile 9	Vigintile 18	Expr 60-70%
ENSG00000065000.15	ENST00000345016.9,ENST00000355272.10,ENST00000585652.5,ENST00000586177.1,ENST00000586370.5,ENST00000589223.5,ENST00000589369.2,ENST00000590683.2,ENST00000591284.2,ENST00000591631.2,ENST00000591650.1,ENST00000592488.2	4423.08	4202.97	13009	115.31	97.05	13009	0	110.04	97.3	106.434	113.657	0.0113223	94.1899	100.564	0.011257	chr19	2100988	2164465	2132726	-	protein_coding	KNOWN	AP3D1	12	32	1.94756	Decile 10	Vigintile 20	Expr 94-95%
ENSG00000065029.14	ENST00000229405.8,ENST00000339411.5,ENST00000373953.7,ENST00000460229.1,ENST00000469195.5,ENST00000479226.1,ENST00000482946.1,ENST00000484932.5,ENST00000486891.5,ENST00000491400.5,ENST00000498555.1	2111.92	1891.81	1078	21.23	17.87	1078	0	39.37	34.81	19.3791	76.8839	0.28395	17.1639	68.0272	0.283942	chr6	35258909	35295985	35277447	+	protein_coding	KNOWN	ZNF76	11	14	0.711436	Decile 10	Vigintile 19	Expr 60-70%
ENSG00000065054.13	ENST00000424542.6,ENST00000432365.6,ENST00000561844.5,ENST00000563587.5,ENST00000564033.1,ENST00000565086.1,ENST00000565855.5,ENST00000566198.1,ENST00000567504.5	1216.06	995.95	290	10.85	9.13	290	0	10.75	9.51	9.43909	12.1199	0.0432034	8.34747	10.7153	0.0431907	chr16	2025356	2039026	2032191	+	protein_coding	KNOWN	SLC9A3R2	9	7	2.00041	Decile 10	Vigintile 20	Expr 50-60%
ENSG00000065057.7	ENST00000219066.5,ENST00000561841.1,ENST00000561862.5,ENST00000562120.1,ENST00000562951.5,ENST00000565406.5,ENST00000566380.5,ENST00000567727.5,ENST00000568513.5,ENST00000623977.1	859.24	639.16	1041	60.68	51.07	1041	0.05	58.21	51.47	52.9485	63.3712	0.030675	46.8657	56.0706	0.0306598	chr16	2039815	2047866	2043840	-	protein_coding	KNOWN	NTHL1	10	7	1.93892	Decile 10	Vigintile 20	Expr 80-90%
ENSG00000065060.16	ENST00000192788.5,ENST00000452449.6	9536.42	9316.31	1766	7.06	5.94	1766	0	6.71	5.93	6.3898	7.02781	0.0163965	5.65	6.21525	0.0163156	chr6	34792015	34883138	34837576	+	protein_coding	KNOWN	UHRF1BP1	2	22	0.595706	Decile 9	Vigintile 18	Expr 40-50%
ENSG00000065135.8	ENST00000369851.5	27174	26953.9	3038.96	4.2	3.54	3038.93	0.26	3.98	3.52	3.82735	4.11398	0.0122989	3.39348	3.64632	0.0122855	chr1	109548611	109618321	109583466	+	protein_coding	KNOWN	GNAI3	1	9	0.417889	Decile 9	Vigintile 17	Expr 30-40%
ENSG00000065150.18	ENST00000261574.9,ENST00000357602.7,ENST00000403772.7,ENST00000421861.6,ENST00000460070.5,ENST00000463157.5,ENST00000468620.1,ENST00000469360.5,ENST00000470493.1,ENST00000471898.5,ENST00000473582.1,ENST00000475420.5,ENST00000479736.1,ENST00000480611.5,ENST00000480641.1,ENST00000481455.5,ENST00000481689.5,ENST00000482642.1,ENST00000485433.5,ENST00000489058.5,ENST00000490369.5,ENST00000490680.5,ENS…	3906.05	3685.95	20831.8	210.55	177.21	20831.8	0.4	211.31	186.84	195.858	230.58	0.0251994	173.241	203.977	0.0252054	chr13	97953658	98024297	97988977	+	protein_coding	KNOWN	IPO5	29	29	-0.042881	Decile 7	Vigintile 14	Expr 96-97%
ENSG00000065154.11	ENST00000368845.5,ENST00000467675.5,ENST00000471127.1,ENST00000476917.5,ENST00000483711.1,ENST00000490096.5,ENST00000492376.1,ENST00000539214.5	2003.65	1783.54	3012.95	62.93	52.97	3012.96	0.2	60.4	53.4	58.0857	62.7263	0.0132879	51.4216	55.516	0.0131915	chr10	124397303	124418976	124408139	-	protein_coding	KNOWN	OAT	8	10	0.465862	Decile 9	Vigintile 18	Expr 80-90%
ENSG00000065183.15	ENST00000349139.5,ENST00000369441.7,ENST00000471680.1,ENST00000487202.5	2540.31	2320.21	2514	40.37	33.97	2513.99	0.1	38.41	33.96	35.2582	41.5452	0.0278415	31.2337	36.7917	0.0278815	chr1	117929720	117966542	117948131	+	protein_coding	KNOWN	WDR3	4	27	0.05111	Decile 8	Vigintile 15	Expr 80-90%
ENSG00000065243.18	ENST00000316005.11,ENST00000370505.7,ENST00000370513.9,ENST00000370521.7,ENST00000436111.1,ENST00000449189.1,ENST00000495119.1	5249.88	5029.76	880	6.52	5.49	880	0	7.21	6.37	6.10843	8.46308	0.0553637	5.40106	7.48331	0.0553317	chr1	88684222	88836255	88760238	+	protein_coding	KNOWN	PKN2	7	22	-0.440413	Decile 4	Vigintile 7	Expr 40-50%
ENSG00000065268.10	ENST00000251289.9,ENST00000585809.5,ENST00000586317.2,ENST00000587001.6,ENST00000590354.3,ENST00000590397.5,ENST00000591155.1,ENST00000591276.1,ENST00000591985.6,ENST00000591997.2,ENST00000607440.5	1374.86	1154.77	2490	80.33	67.61	2490	0	76.84	67.94	70.6545	83.1106	0.027995	62.3497	73.3834	0.0278781	chr19	984271	998438	991354	+	protein_coding	KNOWN	WDR18	11	10	2.01275	Decile 10	Vigintile 20	Expr 91-92%
ENSG00000065308.4	ENST00000182527.3	6908	6687.89	1418	7.9	6.65	1418	0	7.48	6.61	7.07175	7.8524	0.0179545	6.27001	6.95794	0.0179314	chr6	52497402	52576915	52537158	-	protein_coding	KNOWN	TRAM2	1	11	0.198265	Decile 8	Vigintile 16	Expr 40-50%
ENSG00000065320.8	ENST00000173229.6,ENST00000436734.1	5954	5733.89	219	1.42	1.2	219	0	1.43	1.26	1.20171	1.66062	0.0532499	1.06065	1.4663	0.0532253	chr17	9021542	9244000	9132771	+	protein_coding	KNOWN	NTN1	2	7	0.664723	Decile 9	Vigintile 18	Expr 20-30%
ENSG00000065325.12	ENST00000262441.9,ENST00000304773.5,ENST00000458005.2,ENST00000574745.5	2395.75	2175.66	0	0	0	0	0	0.16	0.14	0.0109687	0.40211	0.463775	0.00953572	0.355617	0.463933	chr17	9822206	9892102	9857154	+	protein_coding	KNOWN	GLP2R	4	13	0.239077	Decile 8	Vigintile 16	Non-expressed
ENSG00000065328.16	ENST00000378694.1,ENST00000378714.7,ENST00000459751.1,ENST00000479669.5,ENST00000481292.1,ENST00000484800.6,ENST00000485659.1	3308.47	3088.37	1873	22.59	19.02	1873	0	22.11	19.55	20.3216	24.0012	0.0285414	17.9703	21.2261	0.0285316	chr10	13161554	13211104	13186329	+	protein_coding	KNOWN	MCM10	7	20	0.144107	Decile 8	Vigintile 15	Expr 70-80%
ENSG00000065357.19	ENST00000331886.9,ENST00000394147.5,ENST00000402956.7,ENST00000432422.7,ENST00000546878.5,ENST00000546895.5,ENST00000546995.5,ENST00000547015.5,ENST00000547324.5,ENST00000547358.5,ENST00000547535.5,ENST00000548047.5,ENST00000548378.1,ENST00000548407.6,ENST00000548479.1,ENST00000548491.1,ENST00000548549.5,ENST00000549079.6,ENST00000549085.1,ENST00000549097.5,ENST00000549323.6,ENST00000549368.5,ENS…	1402.85	1182.78	599	18.87	15.88	600.51	1.15	27.07	23.93	21.3882	34.2215	0.0749757	18.9456	30.2954	0.0751047	chr12	55927319	55954027	55940673	+	protein_coding	KNOWN	DGKA	49	24	1.20207	Decile 10	Vigintile 20	Expr 60-70%
ENSG00000065361.14	ENST00000267101.7,ENST00000411731.6,ENST00000415288.6,ENST00000546748.1,ENST00000546884.1,ENST00000548709.1,ENST00000549061.5,ENST00000549205.1,ENST00000549282.5,ENST00000549472.1,ENST00000549644.1,ENST00000549672.5,ENST00000549832.1,ENST00000550070.6,ENST00000550828.1,ENST00000550869.5,ENST00000551085.5,ENST00000551176.1,ENST00000551242.5,ENST00000552691.1,ENST00000553131.5	2955.06	2734.97	3050	41.54	34.97	3050	0	43.38	38.36	38.1869	48.7106	0.0413087	33.9448	43.2603	0.0412758	chr12	56079857	56103505	56091681	+	protein_coding	KNOWN	ERBB3	21	29	1.32784	Decile 10	Vigintile 20	Expr 80-90%
ENSG00000065371.17	ENST00000184183.8,ENST00000405845.7,ENST00000459660.5,ENST00000460743.5,ENST00000467907.5,ENST00000479867.1,ENST00000484329.1,ENST00000487124.1,ENST00000495093.1,ENST00000496145.5,ENST00000620893.4	1377.47	1157.36	2	0.06	0.05	2.53	0.5	0.63	0.56	0.274824	1.03705	0.212748	0.243569	0.917883	0.212823	chr3	123968521	123992178	123980349	-	protein_coding	KNOWN	ROPN1	11	7	0.01714	Decile 7	Vigintile 14	Expr 0-10%
ENSG00000065413.16	ENST00000282272.12,ENST00000328737.6,ENST00000409153.5,ENST00000409919.5,ENST00000422886.5,ENST00000424317.5,ENST00000443014.1,ENST00000447713.1,ENST00000448801.5,ENST00000463879.1,ENST00000473081.1,ENST00000477852.1,ENST00000486006.1,ENST00000493808.1	1577.55	1357.63	28	0.77	0.65	28	0	11.94	10.55	1.2959	30.7985	0.494481	1.18715	27.2806	0.494337	chr2	196967017	197311173	197139095	-	protein_coding	KNOWN	ANKRD44	14	28	-0.277865	Decile 5	Vigintile 10	Expr 20-30%
ENSG00000065427.14	ENST00000302445.7,ENST00000319410.9,ENST00000562875.5,ENST00000564578.5,ENST00000565738.1,ENST00000566249.5,ENST00000566560.5,ENST00000566772.1,ENST00000568378.5,ENST00000568682.5,ENST00000569298.1,ENST00000570215.1	2014.05	1793.94	5961.2	123.79	104.19	5961.16	0.71	118.23	104.54	114.949	121.409	0.00949005	101.662	107.353	0.00943624	chr16	75627474	75648643	75638058	-	protein_coding	KNOWN	KARS	12	15	0.162189	Decile 8	Vigintile 16	Expr 94-95%
ENSG00000065457.10	ENST00000307921.7,ENST00000562374.1,ENST00000564657.1,ENST00000565109.5,ENST00000566445.5,ENST00000566450.5,ENST00000567281.5,ENST00000568001.5,ENST00000568478.1,ENST00000568510.1	1039.73	819.67	638	29	24.41	637.98	0.15	28.57	25.26	25.1828	31.9907	0.0416355	22.2828	28.307	0.0415653	chr16	75596981	75623300	75610140	-	protein_coding	KNOWN	ADAT1	10	11	0.160355	Decile 8	Vigintile 16	Expr 70-80%
ENSG00000065485.17	ENST00000316218.11,ENST00000467157.1,ENST00000469649.1,ENST00000472319.5,ENST00000484644.5,ENST00000485208.1,ENST00000489923.5,ENST00000495004.1	1769.38	1549.27	881	21.18	17.83	881.55	0.89	21.13	18.68	19.3502	22.8579	0.0284104	17.1233	20.2227	0.0284385	chr3	123067062	123225227	123146144	+	protein_coding	KNOWN	PDIA5	8	17	0.25042	Decile 8	Vigintile 16	Expr 60-70%
ENSG00000065491.8	ENST00000373491.3	3462	3241.89	934.98	10.74	9.04	934.96	0.19	10.18	9	9.52827	10.8264	0.0219444	8.43706	9.58486	0.0219196	chr6	37257772	37332970	37295371	+	protein_coding	KNOWN	TBC1D22B	1	13	0.416878	Decile 9	Vigintile 17	Expr 50-60%
ENSG00000065518.7	ENST00000184266.2,ENST00000461682.1,ENST00000485064.1,ENST00000491335.1,ENST00000492739.1,ENST00000496588.1	668.84	448.77	2890	239.91	201.92	2890	0	227.83	201.45	219.443	236.664	0.0129202	194.098	209.29	0.0128825	chr3	120596309	120602500	120599404	+	protein_coding	KNOWN	NDUFB4	6	3	-0.38545	Decile 4	Vigintile 8	Expr 97-98%
ENSG00000065526.10	ENST00000375759.7,ENST00000438066.1,ENST00000442985.1,ENST00000471538.1,ENST00000487496.1	5722.74	5502.66	4120	27.89	23.48	4120	0	26.62	23.54	23.9005	29.4593	0.035945	21.1373	26.0548	0.035926	chr1	15847864	15940460	15894162	+	protein_coding	KNOWN	SPEN	5	15	0.810474	Decile 10	Vigintile 19	Expr 70-80%
ENSG00000065534.18	ENST00000346322.9,ENST00000354792.9,ENST00000359169.5,ENST00000360304.7,ENST00000360772.7,ENST00000418370.6,ENST00000464489.5,ENST00000475616.5,ENST00000503644.1,ENST00000504946.5,ENST00000506361.5,ENST00000508240.1,ENST00000510571.1,ENST00000510775.5,ENST00000511058.1,ENST00000513111.1,ENST00000514623.1,ENST00000514895.5,ENST00000515434.1,ENST00000578202.1,ENST00000583087.5	5399.23	5179.12	974	7.01	5.9	974	0	13.6	12.02	7.48473	21.9445	0.188197	6.57039	19.3674	0.188172	chr3	123610049	123884331	123747190	-	protein_coding	KNOWN	MYLK	21	34	0.078164	Decile 8	Vigintile 15	Expr 40-50%
ENSG00000065548.17	ENST00000337859.10,ENST00000421536.5,ENST00000437396.1,ENST00000445547.1,ENST00000468120.5,ENST00000477672.1,ENST00000481101.5,ENST00000496289.1,ENST00000498757.1	2055.69	1835.58	2223	45.12	37.97	2223	0	44.25	39.13	41.9443	46.594	0.0180088	37.1304	41.2368	0.0179617	chr2	186486156	186509363	186497759	+	protein_coding	KNOWN	ZC3H15	9	10	-0.471755	Decile 4	Vigintile 7	Expr 80-90%
ENSG00000065559.14	ENST00000353533.9,ENST00000415385.7,ENST00000536413.2,ENST00000538465.7,ENST00000579089.5,ENST00000581941.5,ENST00000582183.5,ENST00000582377.1,ENST00000582897.5,ENST00000585076.1,ENST00000602305.5,ENST00000602375.5,ENST00000602537.5,ENST00000602686.5,ENST00000602811.5	3617.2	3397.09	1193.98	13.09	11.02	1193.97	0.18	13.95	12.33	12.7077	15.2539	0.0317277	11.2418	13.4945	0.0317085	chr17	12020824	12143830	12082327	+	protein_coding	KNOWN	MAP2K4	15	12	-0.03778	Decile 7	Vigintile 14	Expr 50-60%
ENSG00000065600.12	ENST00000261455.8,ENST00000467822.5,ENST00000471937.1,ENST00000478166.5,ENST00000535273.2	1704.87	1484.76	430	10.79	9.08	430	0	10.72	9.48	8.88917	12.5346	0.0582211	7.872	11.0989	0.0581973	chr1	212363931	212414901	212389416	-	protein_coding	KNOWN	TMEM206	5	9	0.069736	Decile 8	Vigintile 15	Expr 50-60%
ENSG00000065609.14	ENST00000195649.10,ENST00000369690.6,ENST00000369691.5,ENST00000369694.6,ENST00000439399.6,ENST00000518309.6,ENST00000518312.5,ENST00000519133.1,ENST00000519779.5,ENST00000519825.5,ENST00000520213.5,ENST00000520302.5,ENST00000521485.5,ENST00000521616.5,ENST00000521743.5,ENST00000521931.5,ENST00000522248.5,ENST00000523199.1,ENST00000523448.5,ENST00000523484.6,ENST00000523585.5,ENST00000523780.1	2598.12	2378.01	26	0.41	0.34	26	0	2.53	2.23	1.11779	4.42626	0.220234	0.989863	3.91718	0.220226	chr6	83552880	83709691	83631285	-	protein_coding	KNOWN	SNAP91	22	30	-0.48856	Decile 3	Vigintile 6	Expr 10-20%
ENSG00000065613.13	ENST00000335753.8,ENST00000369755.3,ENST00000474260.1	7558.68	7338.56	1362	6.91	5.82	1362	0	6.67	5.89	6.18801	7.1986	0.0252929	5.45994	6.35424	0.0252786	chr10	103967201	104029233	103998217	+	protein_coding	KNOWN	SLK	3	19	-0.196547	Decile 6	Vigintile 11	Expr 40-50%
ENSG00000065615.13	ENST00000369679.4,ENST00000369681.9,ENST00000479164.1	2832.14	2612.04	385	5.49	4.62	385	0	5.32	4.71	3.99184	6.6402	0.0861985	3.53812	5.88167	0.0860616	chr6	83859643	83967424	83913533	+	protein_coding	KNOWN	CYB5R4	3	16	-0.393461	Decile 4	Vigintile 8	Expr 40-50%
ENSG00000065618.16	ENST00000353479.9,ENST00000369733.7,ENST00000393211.3,ENST00000433822.1,ENST00000480127.1,ENST00000483876.1,ENST00000488320.1	2112.81	1892.75	33	0.65	0.55	33	0	1.12	0.99	0.525568	1.77806	0.198244	0.463035	1.57171	0.198304	chr10	104031286	104086002	104058644	-	protein_coding	KNOWN	COL17A1	7	56	0.110974	Decile 8	Vigintile 15	Expr 10-20%
ENSG00000065621.14	ENST00000338595.6,ENST00000369707.2,ENST00000450629.6,ENST00000467629.1,ENST00000473401.5,ENST00000477078.2,ENST00000498052.1	1662.31	1442.21	508	13.12	11.04	508	0.05	12.78	11.3	11.0512	14.4864	0.0461681	9.75126	12.7893	0.0461627	chr10	104268873	104304945	104286909	+	protein_coding	KNOWN	GSTO2	7	7	0.112622	Decile 8	Vigintile 15	Expr 50-60%
ENSG00000065665.20	ENST00000298428.13,ENST00000304267.12,ENST00000379017.7,ENST00000379020.8,ENST00000379033.7,ENST00000379051.5,ENST00000418772.1,ENST00000419021.1,ENST00000441368.5,ENST00000457034.1,ENST00000466451.1,ENST00000472221.5,ENST00000475268.5,ENST00000495368.1	1843.15	1623.04	528	12.12	10.2	528	0	12.84	11.36	11.2667	14.4904	0.0431362	9.96522	12.8174	0.0430588	chr10	12129637	12169961	12149799	+	protein_coding	KNOWN	SEC61A2	14	14	0.30048	Decile 9	Vigintile 17	Expr 50-60%
ENSG00000065675.14	ENST00000263125.9,ENST00000397176.6,ENST00000539722.5,ENST00000610727.1	3236.69	3016.58	968	11.95	10.06	968	0	11.35	10.04	10.6098	12.0576	0.0221298	9.38806	10.6686	0.0220796	chr10	6427143	6580301	6503722	-	protein_coding	KNOWN	PRKCQ	4	18	-0.113034	Decile 7	Vigintile 13	Expr 50-60%
ENSG00000065717.14	ENST00000262953.10,ENST00000426948.6,ENST00000443826.7,ENST00000455444.6,ENST00000586422.5,ENST00000586492.1,ENST00000587137.5,ENST00000587217.5,ENST00000587672.5,ENST00000587770.5,ENST00000587893.1,ENST00000589205.5,ENST00000589291.1,ENST00000589364.5,ENST00000590101.5,ENST00000590183.5,ENST00000590536.5,ENST00000591457.5,ENST00000591529.5,ENST00000591720.1,ENST00000592305.5,ENST00000592584.1	1959.97	1739.87	398	8.52	7.17	398	0	11.6	10.26	9.51311	13.9369	0.0663302	8.42933	12.3418	0.0663582	chr19	2997638	3047635	3022636	-	protein_coding	KNOWN	TLE2	22	20	1.51591	Decile 10	Vigintile 20	Expr 50-60%
ENSG00000065802.11	ENST00000264607.8,ENST00000409297.1,ENST00000438264.5,ENST00000463352.5,ENST00000468122.1,ENST00000469885.1,ENST00000473306.1,ENST00000481566.1,ENST00000491653.1	2668.62	2448.53	1780	27.08	22.79	1780	0	26.77	23.67	24.0824	29.607	0.0354318	21.3136	26.1955	0.0353635	chr2	238426742	238452250	238439496	+	protein_coding	KNOWN	ASB1	9	5	0.479344	Decile 9	Vigintile 18	Expr 70-80%
ENSG00000065809.13	ENST00000181796.6,ENST00000378458.6,ENST00000378462.5,ENST00000378465.7,ENST00000378467.8,ENST00000378470.5,ENST00000442012.5,ENST00000452706.6,ENST00000464952.5,ENST00000468492.5,ENST00000468747.5,ENST00000471815.5,ENST00000472095.5,ENST00000474143.5,ENST00000475786.5,ENST00000475858.1,ENST00000478076.5,ENST00000479731.5,ENST00000481209.5,ENST00000482277.5,ENST00000487335.5,ENST00000488576.5,ENS…	2722.02	2501.91	591	8.8	7.41	591	0	11.64	10.29	10.0053	13.3633	0.049822	8.8367	11.8092	0.049824	chr10	14518557	14774897	14646727	-	protein_coding	KNOWN	FAM107B	29	6	-0.019193	Decile 7	Vigintile 14	Expr 50-60%
ENSG00000065833.8	ENST00000369705.3	3371	3150.89	184	2.18	1.83	184	0	2.07	1.83	1.7731	2.36786	0.0496649	1.57119	2.09707	0.0496769	chr6	83210389	83431071	83320730	-	protein_coding	KNOWN	ME1	1	14	-0.445837	Decile 4	Vigintile 7	Expr 30-40%
ENSG00000065882.15	ENST00000261439.8,ENST00000401554.5,ENST00000402522.1,ENST00000405444.3,ENST00000406664.5,ENST00000407365.5,ENST00000421339.3,ENST00000443855.5,ENST00000446803.6,ENST00000469803.1,ENST00000475531.1,ENST00000491553.1,ENST00000492180.1,ENST00000508802.5,ENST00000509761.1,ENST00000510573.6,ENST00000511238.5,ENST00000513936.6,ENST00000615497.4	1925.39	1705.28	3860	84.33	70.97	3860	0	81.96	72.47	74.9689	88.8974	0.0296598	66.3316	78.6445	0.0296656	chr4	37891087	38139175	38015131	+	protein_coding	KNOWN	TBC1D1	19	21	-0.155924	Decile 6	Vigintile 12	Expr 91-92%
ENSG00000065883.14	ENST00000181839.8,ENST00000340829.9,ENST00000465643.1,ENST00000478563.1,ENST00000484589.1,ENST00000611390.1,ENST00000613626.4	4568.86	4348.74	1970	16.88	14.2	1970	0	16.62	14.7	15.2796	18.0109	0.0280469	13.5341	15.9464	0.0279983	chr7	39950037	40097134	40023585	+	protein_coding	KNOWN	CDK13	7	14	-0.075406	Decile 7	Vigintile 13	Expr 60-70%
ENSG00000065911.11	ENST00000394053.6,ENST00000409601.1,ENST00000409804.5,ENST00000462026.1,ENST00000470592.5,ENST00000477455.5,ENST00000488086.1,ENST00000489041.1	1695.74	1475.65	5716.65	144.32	121.47	5716.51	1.33	136.78	120.94	130.317	143.33	0.0164225	115.362	126.882	0.0164096	chr2	74198562	74217565	74208063	+	protein_coding	KNOWN	MTHFD2	8	8	0.819115	Decile 10	Vigintile 19	Expr 95-96%
ENSG00000065923.9	ENST00000328306.4,ENST00000464933.5,ENST00000489574.2,ENST00000491894.4,ENST00000616978.4	5267.33	5047.25	748	5.52	4.65	748	0	5.7	5.04	4.31554	7.18211	0.0881274	3.82298	6.35995	0.0880662	chrX	46599252	46759172	46679212	-	protein_coding	KNOWN	SLC9A7	5	17	0.429636	Decile 9	Vigintile 17	Expr 40-50%
ENSG00000065970.8	ENST00000162391.7,ENST00000428177.2,ENST00000539192.1	5374.71	5154.6	616	4.45	3.75	616	0	4.37	3.86	3.93301	4.84766	0.0354814	3.47966	4.2887	0.0354845	chr12	8032703	8055503	8044103	+	protein_coding	KNOWN	FOXJ2	3	11	0.913567	Decile 10	Vigintile 19	Expr 30-40%
ENSG00000065978.17	ENST00000321358.11,ENST00000332220.10,ENST00000436427.1,ENST00000467957.1,ENST00000616651.4	1504.6	1284.49	31532.5	914.53	769.72	31531.8	8.68	865.72	765.47	855.776	875.817	0.00400139	757.205	774.42	0.0038786	chr1	42682427	42702349	42692388	+	protein_coding	KNOWN	YBX1	5	16	0.542993	Decile 9	Vigintile 18	Expr 99-100%
ENSG00000065989.15	ENST00000293683.9,ENST00000344979.7,ENST00000380702.6,ENST00000440014.6,ENST00000586275.1,ENST00000589073.1,ENST00000590407.1,ENST00000591971.5,ENST00000592685.5	4363	4142.88	307.93	2.77	2.33	307.93	0.26	3.03	2.68	2.60056	3.48282	0.0499246	2.30397	3.08331	0.0499167	chr19	10416773	10469631	10443202	+	protein_coding	KNOWN	PDE4A	9	17	1.56769	Decile 10	Vigintile 20	Expr 30-40%
ENSG00000066027.11	ENST00000261461.6,ENST00000479259.1,ENST00000498123.5,ENST00000498129.6,ENST00000537030.3	3089.91	2869.8	955	12.4	10.43	955	0	12.15	10.75	11.2968	13.0882	0.0251471	9.99148	11.5759	0.0251168	chr1	212285537	212361863	212323700	+	protein_coding	KNOWN	PPP2R5A	5	13	0.114391	Decile 8	Vigintile 15	Expr 50-60%
ENSG00000066032.18	ENST00000343114.7,ENST00000361291.8,ENST00000402739.8,ENST00000409266.5,ENST00000409550.2,ENST00000409971.6,ENST00000451966.5,ENST00000465616.1,ENST00000466387.5,ENST00000467488.1,ENST00000467892.1,ENST00000493024.5,ENST00000496251.5,ENST00000496558.5,ENST00000497804.1,ENST00000508970.1,ENST00000540488.5,ENST00000541047.5,ENST00000629316.2	3823.44	3603.33	467	4.83	4.06	467	0	6.38	5.64	5.35916	7.51152	0.0579744	4.7446	6.64863	0.0579807	chr2	79185231	80648861	79917046	+	protein_coding	KNOWN	CTNNA2	19	22	-0.43503	Decile 4	Vigintile 7	Expr 40-50%
ENSG00000066044.13	ENST00000351593.9,ENST00000407627.6,ENST00000593807.1,ENST00000595499.1,ENST00000596154.5,ENST00000596459.5	2084.75	1864.64	4282	85.55	72	4281.92	0.28	81.27	71.86	77.9466	84.6129	0.0139648	69.0067	74.8997	0.0139956	chr19	7958579	8445041	8201810	-	protein_coding	KNOWN	ELAVL1	6	8	1.50165	Decile 10	Vigintile 20	Expr 91-92%
ENSG00000066056.13	ENST00000372476.7,ENST00000461061.1,ENST00000471187.1,ENST00000473014.1,ENST00000480269.1,ENST00000485125.1,ENST00000488437.1,ENST00000492599.1,ENST00000492874.1,ENST00000538015.1	2358.33	2138.3	71	1.24	1.04	71	0	2.54	2.25	1.42477	3.81444	0.164222	1.25993	3.3741	0.164176	chr1	43300993	43323108	43312050	+	protein_coding	KNOWN	TIE1	10	23	1.13332	Decile 10	Vigintile 20	Expr 20-30%
ENSG00000066084.12	ENST00000301180.9,ENST00000546719.1,ENST00000546732.1,ENST00000549620.5,ENST00000552328.1	7531.96	7311.84	2066	10.53	8.86	2066	0	10.18	9	9.32963	10.9993	0.0279333	8.26296	9.73779	0.0279176	chr12	50504985	50748667	50626826	+	protein_coding	KNOWN	DIP2B	5	38	0.543508	Decile 9	Vigintile 18	Expr 50-60%
ENSG00000066117.14	ENST00000381513.8,ENST00000394963.8,ENST00000547247.5,ENST00000547637.1,ENST00000548573.5,ENST00000549274.1,ENST00000549526.1,ENST00000550280.1,ENST00000550477.5,ENST00000551352.1,ENST00000551497.1,ENST00000551966.5	2558.65	2338.54	6071	96.71	81.4	6071	0	93.31	82.51	88.6693	98.1409	0.0176906	78.4353	86.7873	0.0176151	chr12	50084972	50100712	50092842	+	protein_coding	KNOWN	SMARCD1	12	13	1.11689	Decile 10	Vigintile 20	Expr 92-93%
ENSG00000066135.12	ENST00000372396.3,ENST00000463151.5,ENST00000472265.1,ENST00000481296.1,ENST00000485249.1	3721.07	3500.96	5562.79	59.19	49.82	5559.38	6.25	56.53	49.99	54.2887	58.7378	0.0134896	48.0716	51.996	0.013483	chr1	43650158	43705515	43677836	+	protein_coding	KNOWN	KDM4A	5	22	1.2583	Decile 10	Vigintile 20	Expr 80-90%
ENSG00000066136.19	ENST00000308733.9,ENST00000372651.5,ENST00000372652.5,ENST00000372653.5,ENST00000372654.5,ENST00000372669.8,ENST00000414185.1,ENST00000416859.6,ENST00000424419.6,ENST00000425457.6,ENST00000427410.6,ENST00000440226.7,ENST00000447388.7,ENST00000453631.5,ENST00000456393.6,ENST00000467203.5,ENST00000483091.1,ENST00000488635.1,ENST00000496608.1,ENST00000525290.5,ENST00000525349.1,ENST00000530965.5,ENS…	1672.85	1452.73	1646.46	42.22	35.54	1646.35	1.33	42.95	37.97	39.9062	46.2563	0.0245684	35.1899	40.8113	0.0245215	chr1	40691570	40771603	40731586	+	protein_coding	KNOWN	NFYC	25	15	0.425939	Decile 9	Vigintile 17	Expr 80-90%
ENSG00000066185.12	ENST00000372565.7,ENST00000461083.1,ENST00000475426.1,ENST00000611861.4	1093.25	873.19	0	0	0	0	0	0.31	0.27	0.0334641	0.69788	0.412205	0.0297221	0.617573	0.412261	chr1	42430329	42456267	42443298	-	protein_coding	KNOWN	ZMYND12	4	8	0.33599	Decile 9	Vigintile 17	Non-expressed
ENSG00000066230.10	ENST00000264938.7,ENST00000507407.1,ENST00000514375.1	1323.64	1103.56	13.13	0.44	0.37	13.76	1.58	0.61	0.54	0.188353	1.13388	0.286854	0.164563	1.00064	0.286646	chr5	473310	524332	498821	-	protein_coding	KNOWN	SLC9A3	3	17	1.38477	Decile 10	Vigintile 20	Expr 10-20%
ENSG00000066248.14	ENST00000264051.7,ENST00000373552.8,ENST00000409079.1,ENST00000414326.1,ENST00000416114.3,ENST00000420650.2,ENST00000424488.5,ENST00000461944.1,ENST00000489127.1	1572.92	1352.85	159	4.38	3.69	159	0	4.95	4.37	3.5596	6.37193	0.0981752	3.14153	5.6291	0.0981032	chr2	232878686	233013272	232945979	-	protein_coding	KNOWN	NGEF	9	15	0.523719	Decile 9	Vigintile 18	Expr 30-40%
ENSG00000066279.16	ENST00000294732.11,ENST00000367408.5,ENST00000367409.8,ENST00000612785.1	6431.76	6211.65	2526	15.15	12.75	2526	0	14.36	12.7	13.6423	15.088	0.0175173	12.0697	13.3472	0.0174808	chr1	197084128	197146694	197115411	-	protein_coding	KNOWN	ASPM	4	28	-0.526628	Decile 3	Vigintile 6	Expr 60-70%
ENSG00000066294.14	ENST00000311224.8,ENST00000360056.7,ENST00000368047.3,ENST00000368048.7,ENST00000368051.3,ENST00000368054.7,ENST00000466767.1,ENST00000534968.5	2771	2550.89	0	0	0	0	0	0.29	0.25	0.0886551	0.523412	0.271618	0.0785294	0.463015	0.271752	chr1	160541095	160579516	160560305	-	protein_coding	KNOWN	CD84	8	8	0.435492	Decile 9	Vigintile 17	Non-expressed
ENSG00000066322.12	ENST00000372458.7,ENST00000413844.3,ENST00000464204.5,ENST00000465321.5,ENST00000468865.6,ENST00000470769.5,ENST00000470968.6,ENST00000478481.5,ENST00000479439.5,ENST00000479686.5,ENST00000482302.5,ENST00000487209.5,ENST00000496932.1,ENST00000497050.5,ENST00000497569.5,ENST00000621943.4	1339.24	1119.14	853	28.39	23.9	853	0	28.82	25.48	26.4747	31.1806	0.0280564	23.4588	27.6215	0.028021	chr1	43363397	43368074	43365735	-	protein_coding	KNOWN	ELOVL1	16	9	1.07468	Decile 10	Vigintile 20	Expr 70-80%
ENSG00000066336.11	ENST00000227163.8,ENST00000378538.7,ENST00000533030.1,ENST00000533968.1	1225.31	1005.2	4	0.15	0.12	4	0	0.31	0.28	0.102938	0.547902	0.25086	0.0911155	0.484764	0.250702	chr11	47354860	47378576	47366718	-	protein_coding	KNOWN	SPI1	4	5	1.19633	Decile 10	Vigintile 20	Expr 0-10%
ENSG00000066379.14	ENST00000332435.9,ENST00000359374.8,ENST00000376782.6,ENST00000376785.2,ENST00000463141.1,ENST00000471008.5	786.99	566.89	566.18	37.21	31.32	565.85	1.72	35.6	31.48	32.6472	38.6377	0.0291793	28.8347	34.1232	0.0292154	chr6	30058899	30064909	30061904	+	protein_coding	KNOWN	ZNRD1	6	5	0.420778	Decile 9	Vigintile 17	Expr 80-90%
ENSG00000066382.16	ENST00000358117.9,ENST00000448418.6,ENST00000524636.1,ENST00000524667.5,ENST00000525519.1,ENST00000526437.5,ENST00000528686.2,ENST00000529220.5	1629.9	1409.83	85	2.25	1.89	85	0	2.85	2.52	1.90289	3.9051	0.1221	1.68058	3.45098	0.122117	chr11	30384493	30586872	30485682	-	protein_coding	KNOWN	MPPED2	8	8	-0.247718	Decile 6	Vigintile 11	Expr 30-40%
ENSG00000066405.12	ENST00000183605.9,ENST00000343735.8,ENST00000479660.1	2798.4	2578.29	7	0.1	0.09	7	0	0.13	0.12	0.0541212	0.227353	0.227439	0.0474596	0.200714	0.227375	chr3	137998735	138033655	138016195	+	protein_coding	KNOWN	CLDN18	3	5	-0.068089	Decile 7	Vigintile 13	Expr 0-10%
ENSG00000066422.4	ENST00000312938.4,ENST00000461821.1,ENST00000471673.1	5611.65	5391.54	702.79	4.86	4.09	702.8	3.36	4.76	4.21	4.31401	5.23504	0.0323085	3.80336	4.6179	0.0322734	chr3	101648889	101677495	101663192	-	protein_coding	KNOWN	ZBTB11	3	11	-0.271194	Decile 5	Vigintile 10	Expr 40-50%
ENSG00000066427.21	ENST00000340660.10,ENST00000359366.9,ENST00000393287.9,ENST00000429774.6,ENST00000454964.3,ENST00000502250.5,ENST00000503767.5,ENST00000504047.1,ENST00000506466.5,ENST00000507965.5,ENST00000511362.5,ENST00000515746.5,ENST00000526245.1,ENST00000526872.2,ENST00000532032.5,ENST00000545170.5,ENST00000553287.5,ENST00000553309.5,ENST00000553488.5,ENST00000553491.5,ENST00000553498.5,ENST00000553570.5,EN…	1366.88	1146.84	740.63	24.06	20.25	740.49	1.2	24.78	21.91	20.8137	28.7717	0.05444	18.4261	25.4609	0.0544528	chr14	92038652	92106621	92072636	-	protein_coding	KNOWN	ATXN3	53	13	0.161582	Decile 8	Vigintile 16	Expr 70-80%
ENSG00000066455.12	ENST00000163416.6,ENST00000554700.1,ENST00000555793.1	2819.25	2599.13	938	13.44	11.32	938	0	12.93	11.44	11.9469	13.9339	0.0264516	10.587	12.345	0.0264937	chr14	92794231	92839963	92817097	+	protein_coding	KNOWN	GOLGA5	3	13	0.079121	Decile 8	Vigintile 15	Expr 50-60%
ENSG00000066468.20	ENST00000336553.10,ENST00000346997.6,ENST00000351936.10,ENST00000356226.8,ENST00000357555.9,ENST00000358487.9,ENST00000359354.6,ENST00000360144.7,ENST00000369056.5,ENST00000369058.7,ENST00000369059.5,ENST00000369060.8,ENST00000369061.8,ENST00000429361.5,ENST00000457416.6,ENST00000463870.5,ENST00000467584.1,ENST00000478859.5,ENST00000490349.5,ENST00000491111.1,ENST00000491475.1,ENST00000604236.5,E…	3436.09	3215.98	3722	43.12	36.29	3722	0	42.56	37.63	40.1894	45.048	0.0194653	35.5477	39.8509	0.0195163	chr10	121478334	121598458	121538396	-	protein_coding	KNOWN	FGFR2	25	18	0.308761	Decile 9	Vigintile 17	Expr 80-90%
ENSG00000066557.5	ENST00000370952.3	2884	2663.89	747	10.45	8.79	747	0	9.9	8.75	9.20472	10.6164	0.0246985	8.1513	9.39828	0.0246848	chr1	70144805	70205620	70175212	-	protein_coding	KNOWN	LRRC40	1	15	-0.457142	Decile 4	Vigintile 7	Expr 50-60%
ENSG00000066583.11	ENST00000173527.5,ENST00000514194.5	1886.99	1666.88	844	18.86	15.88	844	0	18.11	16.01	16.647	19.6806	0.0282826	14.731	17.4126	0.028239	chr5	129094751	129114028	129104389	+	protein_coding	KNOWN	ISOC1	2	5	-0.568966	Decile 3	Vigintile 5	Expr 60-70%
[truncated: 18,869 more rows]

## Sheet: HCT116
gene_id	transcript_id(s)	length	effective_length	expected_count	TPM	FPKM	posterior_mean_count	posterior_standard_deviation_of_count	pme_TPM	pme_FPKM	TPM_ci_lower_bound	TPM_ci_upper_bound	TPM_coefficient_of_quartile_variation	FPKM_ci_lower_bound	FPKM_ci_upper_bound	FPKM_coefficient_of_quartile_variation	#chrom	start	stop	mid	strand	gene_type	gene_status	gene_name	isoform_count	exon_count	HCT116_SON_TSA_2.0	HCT116_SON_TSA_2.0.deciles	HCT116_SON_TSA_2.0.vigintiles	FPKM_percentile
[truncated: 19,844 more rows]

[truncated: 2 more sheets: K562, HFF]
